# Supplementary material
Source: publisher figshare collection journal article supplement (https://acs.figshare.com/ndownloader/files/4091518)
Supplement: Supplementary file 1 [file 4091518]

data_2312

_audit_creation_method            'SHELXL-97 & ZCIF'
_chemical_name_systematic
;
QY0716
;
_chemical_name_common             QY0716
_chemical_formula_moiety          'C27 H33 Br N2 O4 Si'
_chemical_formula_sum             'C27 H33 Br N2 O4 Si'
_chemical_formula_weight          557.55

loop_
 _atom_type_symbol
 _atom_type_description
 _atom_type_scat_dispersion_real
 _atom_type_scat_dispersion_imag
 _atom_type_scat_source
 'C'  'C'   0.0033   0.0016
 'International Tables Vol C Tables 4.2.6.8 and 6.1.1.4'
 'H'  'H'   0.0000   0.0000
 'International Tables Vol C Tables 4.2.6.8 and 6.1.1.4'
 'N'  'N'   0.0061   0.0033
 'International Tables Vol C Tables 4.2.6.8 and 6.1.1.4'
 'O'  'O'   0.0106   0.0060
 'International Tables Vol C Tables 4.2.6.8 and 6.1.1.4'
 'Si'  'Si'   0.0817   0.0704
 'International Tables Vol C Tables 4.2.6.8 and 6.1.1.4'
 'Br'  'Br'  -0.2901   2.4595
 'International Tables Vol C Tables 4.2.6.8 and 6.1.1.4'

_space_group_crystal_system       triclinic
_space_group_IT_number            2
_space_group_name_H-M_alt         'P -1'
_space_group_name_Hall            '-P 1'

_shelx_space_group_comment
;
The symmetry employed for this shelxl refinement is uniquely defined
by the following loop, which should always be used as a source of
symmetry information in preference to the above space-group names.
They are only intended as comments.
;

loop_
 _space_group_symop_operation_xyz
 'x, y, z'
 '-x, -y, -z'

_cell_length_a                    12.0963(12)
_cell_length_b                    12.6843(13)
_cell_length_c                    18.3120(18)
_cell_angle_alpha                 90.5361(16)
_cell_angle_beta                  94.8492(17)
_cell_angle_gamma                 102.6097(16)
_cell_volume                      2731.0(5)
_cell_formula_units_Z             4
_cell_measurement_temperature     150(2)
_cell_measurement_reflns_used     13943
_cell_measurement_theta_min       2.3
_cell_measurement_theta_max       30.9

_exptl_crystal_description        needle
_exptl_crystal_colour             colourless
_exptl_crystal_density_meas       ?
_exptl_crystal_density_method     'not measured'
_exptl_crystal_density_diffrn     1.356
_exptl_crystal_F_000              1160
_exptl_transmission_factor_min    ?
_exptl_transmission_factor_max    ?
_exptl_crystal_size_max           0.51
_exptl_crystal_size_mid           0.165
_exptl_crystal_size_min           0.145
_exptl_absorpt_coefficient_mu     1.583
_shelx_estimated_absorpt_T_min    0.499
_shelx_estimated_absorpt_T_max    0.803
_exptl_absorpt_correction_type    multi-scan
_exptl_absorpt_correction_T_min   0.670
_exptl_absorpt_correction_T_max   0.795
_exptl_absorpt_process_details    'SADABS (Sheldrick, 2008)'

_diffrn_ambient_temperature       150(2)
_diffrn_radiation_wavelength      0.71073
_diffrn_radiation_type            MoK\a
_diffrn_radiation_source          ?
_diffrn_radiation_monochromator   ?
_diffrn_measurement_device_type   'three-circle diffractometer'
_diffrn_measurement_method        '\f and \w scans'
_diffrn_detector_area_resol_mean  8.333
_diffrn_reflns_number             46940
_diffrn_reflns_sigmaI/netI        0.0338
_diffrn_reflns_av_R_equivalents   0.0266
_diffrn_reflns_limit_h_min        -17
_diffrn_reflns_limit_h_max        16
_diffrn_reflns_limit_k_min        -17
_diffrn_reflns_limit_k_max        17
_diffrn_reflns_limit_l_min        -25
_diffrn_reflns_limit_l_max        25
_diffrn_reflns_theta_min          2.015
_diffrn_reflns_theta_max          29.999
_diffrn_reflns_theta_full         25.242
_diffrn_measured_fraction_theta_max   0.995
_diffrn_measured_fraction_theta_full  0.999
_diffrn_reflns_Laue_measured_fraction_max    0.995
_diffrn_reflns_Laue_measured_fraction_full   0.999
_diffrn_reflns_point_group_measured_fraction_max   0.995
_diffrn_reflns_point_group_measured_fraction_full  0.999
_reflns_number_total              15841
_reflns_number_gt                 11997
_reflns_threshold_expression      'I > 2\s(I)'
_reflns_Friedel_coverage          0.000
_reflns_Friedel_fraction_max      .
_reflns_Friedel_fraction_full     .

_reflns_special_details
;
 The reflections were merged according to the crystal class
 for structure refinement and the calculation of statistics.
 _reflns_Friedel_fraction is defined as the number of unique
 Friedel pairs measured divided by the number that would be
 possible theoretically, ignoring centric projections and
 systematic absences.
;

_computing_data_collection        'Apex2 (Bruker, 2010)'
_computing_cell_refinement        Apex2
_computing_data_reduction         Apex2
_computing_structure_solution     'SHELXS (Sheldrick, 2008)'
_computing_structure_refinement   'SHELXL-2012 (Sheldrick, 2012)'
_computing_molecular_graphics     'XSHEL (Bruker, 2004)'
_computing_publication_material   SHELXL-97
_refine_ls_structure_factor_coef  Fsqd
_refine_ls_matrix_type            full
_refine_ls_weighting_scheme       calc
_refine_ls_weighting_details
;
 w=1/[\s^2^(Fo^2^)+(0.0100P)^2^+1.7320P]
 where P=(Fo^2^+2Fc^2^)/3
;
_atom_sites_solution_primary      direct 
_atom_sites_solution_secondary    difmap 
_atom_sites_solution_hydrogens    difmap
_refine_ls_hydrogen_treatment     refxyz
_refine_ls_extinction_method      none
_refine_ls_extinction_coef        .
_refine_ls_number_reflns          15841
_refine_ls_number_parameters      829
_refine_ls_number_restraints      0
_refine_ls_R_factor_all           0.0543
_refine_ls_R_factor_gt            0.0338
_refine_ls_wR_factor_ref          0.0634
_refine_ls_wR_factor_gt           0.0598
_refine_ls_goodness_of_fit_ref    1.000
_refine_ls_restrained_S_all       1.000
_refine_ls_shift/su_max           0.001
_refine_ls_shift/su_mean          0.000

loop_
 _atom_site_label
 _atom_site_type_symbol
 _atom_site_fract_x
 _atom_site_fract_y
 _atom_site_fract_z
 _atom_site_U_iso_or_equiv
 _atom_site_adp_type
 _atom_site_occupancy
 _atom_site_site_symmetry_order
 _atom_site_calc_flag
 _atom_site_refinement_flags
 _atom_site_disorder_assembly
 _atom_site_disorder_group
C1A C 0.10374(12) 0.59227(12) 0.39322(7) 0.0176(3) Uani 1 1 d D . .
C2A C 0.22440(12) 0.58135(12) 0.41387(8) 0.0191(3) Uani 1 1 d D . .
H2A H 0.2516(14) 0.6125(13) 0.4611(9) 0.023 Uiso 1 1 d D . .
H2B H 0.2752(14) 0.6155(13) 0.3784(9) 0.023 Uiso 1 1 d D . .
C3A C 0.21224(12) 0.45778(12) 0.41202(7) 0.0173(3) Uani 1 1 d D . .
H3A H 0.1840(13) 0.4285(13) 0.4585(9) 0.021 Uiso 1 1 d D . .
N4A N 0.12279(10) 0.42682(10) 0.34960(6) 0.0169(2) Uani 1 1 d D . .
C5A C 0.05672(12) 0.31343(12) 0.34708(8) 0.0186(3) Uani 1 1 d D . .
H5A H 0.1084(14) 0.2684(13) 0.3662(9) 0.022 Uiso 1 1 d D . .
C6A C -0.03777(14) 0.31196(13) 0.39861(8) 0.0223(3) Uani 1 1 d D . .
H6A H -0.1074(15) 0.2674(14) 0.3808(9) 0.027 Uiso 1 1 d D . .
H6B H -0.0180(14) 0.2906(14) 0.4458(10) 0.027 Uiso 1 1 d D . .
C7A C -0.04569(12) 0.42887(12) 0.40550(7) 0.0193(3) Uani 1 1 d D . .
N8A N 0.04041(10) 0.48974(10) 0.36659(6) 0.0171(2) Uani 1 1 d D . .
O9A O -0.11179(9) 0.46721(9) 0.43757(6) 0.0249(2) Uani 1 1 d D . .
C10A C 0.05991(12) 0.67828(12) 0.40530(7) 0.0185(3) Uani 1 1 d D . .
O10A O 0.12860(9) 0.76573(8) 0.44252(5) 0.0212(2) Uani 1 1 d D . .
C11A C -0.06266(12) 0.68220(12) 0.39325(8) 0.0210(3) Uani 1 1 d D . .
O11A O -0.10810(9) 0.73189(9) 0.43410(6) 0.0298(3) Uani 1 1 d D . .
O12A O -0.11391(9) 0.62894(9) 0.33202(6) 0.0244(2) Uani 1 1 d D . .
C13A C -0.23532(15) 0.62147(18) 0.32139(11) 0.0357(4) Uani 1 1 d D . .
H13A H -0.2710(18) 0.5818(18) 0.3586(12) 0.054 Uiso 1 1 d D . .
H13B H -0.2612(18) 0.5857(17) 0.2751(12) 0.054 Uiso 1 1 d D . .
H13C H -0.2488(18) 0.6921(18) 0.3208(11) 0.054 Uiso 1 1 d D . .
Si1A Si 0.15054(4) 0.89767(3) 0.42708(2) 0.02062(8) Uani 1 1 d D . .
C14A C 0.04949(16) 0.92820(16) 0.35205(10) 0.0320(4) Uani 1 1 d D . .
H14A H 0.0448(17) 0.8837(17) 0.3107(12) 0.048 Uiso 1 1 d D . .
H14B H 0.0759(17) 1.0016(18) 0.3378(11) 0.048 Uiso 1 1 d D . .
H14C H -0.0267(18) 0.9173(16) 0.3654(11) 0.048 Uiso 1 1 d D . .
C15A C 0.13471(17) 0.95973(15) 0.51678(10) 0.0318(4) Uani 1 1 d D . .
H15A H 0.0601(18) 0.9325(16) 0.5312(11) 0.048 Uiso 1 1 d D . .
H15B H 0.1464(17) 1.0362(18) 0.5155(11) 0.048 Uiso 1 1 d D . .
H15C H 0.1894(18) 0.9416(16) 0.5546(11) 0.048 Uiso 1 1 d D . .
C16A C 0.30085(13) 0.93760(13) 0.40119(8) 0.0252(3) Uani 1 1 d D . .
C17A C 0.34051(18) 1.06139(16) 0.40076(12) 0.0405(4) Uani 1 1 d D . .
H17A H 0.3386(19) 1.0952(18) 0.4494(13) 0.061 Uiso 1 1 d D . .
H17B H 0.2915(19) 1.0931(18) 0.3677(13) 0.061 Uiso 1 1 d D . .
H17C H 0.417(2) 1.0830(18) 0.3844(12) 0.061 Uiso 1 1 d D . .
C18A C 0.37991(15) 0.89293(16) 0.45718(10) 0.0313(4) Uani 1 1 d D . .
H18A H 0.4580(18) 0.9139(16) 0.4448(11) 0.047 Uiso 1 1 d D . .
H18B H 0.3602(17) 0.8136(18) 0.4586(11) 0.047 Uiso 1 1 d D . .
H18C H 0.3797(17) 0.9214(16) 0.5068(12) 0.047 Uiso 1 1 d D . .
C19A C 0.30789(17) 0.88917(17) 0.32475(10) 0.0337(4) Uani 1 1 d D . .
H19A H 0.2619(18) 0.9192(17) 0.2874(12) 0.051 Uiso 1 1 d D . .
H19B H 0.2830(18) 0.8093(18) 0.3241(11) 0.051 Uiso 1 1 d D . .
H19C H 0.3868(18) 0.9067(17) 0.3117(11) 0.051 Uiso 1 1 d D . .
C31A C 0.31828(12) 0.41861(11) 0.39908(7) 0.0175(3) Uani 1 1 d D . .
C32A C 0.36487(13) 0.43058(13) 0.33191(8) 0.0234(3) Uani 1 1 d D . .
H32A H 0.3282(14) 0.4643(14) 0.2936(9) 0.028 Uiso 1 1 d D . .
C33A C 0.46279(13) 0.39428(14) 0.32057(8) 0.0252(3) Uani 1 1 d D . .
H33A H 0.4953(15) 0.4036(14) 0.2757(10) 0.030 Uiso 1 1 d D . .
C34A C 0.51293(12) 0.34524(12) 0.37723(8) 0.0220(3) Uani 1 1 d D . .
C35A C 0.46909(14) 0.33263(15) 0.44466(9) 0.0299(4) Uani 1 1 d D . .
H35A H 0.5026(16) 0.2980(15) 0.4811(10) 0.036 Uiso 1 1 d D . .
C36A C 0.37093(14) 0.36931(14) 0.45503(8) 0.0274(3) Uani 1 1 d D . .
H36A H 0.3396(15) 0.3606(14) 0.5017(10) 0.033 Uiso 1 1 d D . .
Br1A Br 0.643280(14) 0.289552(16) 0.362186(10) 0.03475(5) Uani 1 1 d D . .
C41A C 0.01073(12) 0.27729(12) 0.26880(8) 0.0196(3) Uani 1 1 d D . .
C42A C -0.05070(14) 0.17152(14) 0.25412(9) 0.0288(3) Uani 1 1 d D . .
H42A H -0.0620(15) 0.1246(15) 0.2934(10) 0.035 Uiso 1 1 d D . .
C43A C -0.09053(16) 0.13575(16) 0.18295(10) 0.0369(4) Uani 1 1 d D . .
H43A H -0.1296(17) 0.0645(17) 0.1739(11) 0.044 Uiso 1 1 d D . .
C44A C -0.07047(15) 0.20529(16) 0.12526(10) 0.0352(4) Uani 1 1 d D . .
H44A H -0.0985(16) 0.1817(15) 0.0752(11) 0.042 Uiso 1 1 d D . .
C45A C -0.01080(14) 0.31035(15) 0.13941(9) 0.0279(3) Uani 1 1 d D . .
H45A H 0.0022(15) 0.3600(15) 0.1007(10) 0.033 Uiso 1 1 d D . .
C46A C 0.02976(13) 0.34665(13) 0.21067(8) 0.0220(3) Uani 1 1 d D . .
H46A H 0.0700(14) 0.4197(14) 0.2201(9) 0.026 Uiso 1 1 d D . .
C1B C 0.41444(12) 0.42749(12) 0.11743(7) 0.0192(3) Uani 1 1 d D . .
C2B C 0.29230(13) 0.43761(12) 0.10313(9) 0.0208(3) Uani 1 1 d D . .
H2C H 0.2495(14) 0.4138(13) 0.1443(9) 0.025 Uiso 1 1 d D . .
H2D H 0.2556(14) 0.3970(14) 0.0607(9) 0.025 Uiso 1 1 d D . .
C3B C 0.30501(12) 0.56064(12) 0.09550(8) 0.0189(3) Uani 1 1 d D . .
H3B H 0.3259(14) 0.5796(13) 0.0470(9) 0.023 Uiso 1 1 d D . .
N4B N 0.40362(10) 0.60094(10) 0.15025(6) 0.0179(2) Uani 1 1 d D . .
C5B C 0.46968(13) 0.71256(12) 0.14062(8) 0.0206(3) Uani 1 1 d D . .
H5B H 0.4167(14) 0.7550(13) 0.1201(9) 0.025 Uiso 1 1 d D . .
C6B C 0.55574(14) 0.70134(13) 0.08545(9) 0.0238(3) Uani 1 1 d D . .
H6C H 0.5290(14) 0.7143(14) 0.0373(10) 0.029 Uiso 1 1 d D . .
H6D H 0.6265(15) 0.7459(14) 0.0961(9) 0.029 Uiso 1 1 d D . .
C7B C 0.56284(12) 0.58413(12) 0.08809(8) 0.0207(3) Uani 1 1 d D . .
N8B N 0.48172(10) 0.53288(10) 0.13401(6) 0.0184(2) Uani 1 1 d D . .
O9B O 0.62510(9) 0.53874(9) 0.05755(6) 0.0265(2) Uani 1 1 d D . .
C10B C 0.45474(12) 0.33850(12) 0.10936(8) 0.0197(3) Uani 1 1 d D . .
O10B O 0.38112(9) 0.24512(8) 0.08228(5) 0.0224(2) Uani 1 1 d D . .
C11B C 0.57740(13) 0.33283(12) 0.11644(8) 0.0225(3) Uani 1 1 d D . .
O11B O 0.61743(10) 0.27939(9) 0.07519(6) 0.0317(3) Uani 1 1 d D . .
O12B O 0.63525(9) 0.39007(9) 0.17470(6) 0.0255(2) Uani 1 1 d D . .
C13B C 0.75646(15) 0.39356(18) 0.18125(11) 0.0360(4) Uani 1 1 d D . .
H13D H 0.7695(18) 0.3211(18) 0.1819(11) 0.054 Uiso 1 1 d D . .
H13E H 0.7868(18) 0.4311(18) 0.2267(12) 0.054 Uiso 1 1 d D . .
H13F H 0.7882(18) 0.4335(18) 0.1419(12) 0.054 Uiso 1 1 d D . .
Si1B Si 0.33857(4) 0.13605(3) 0.13238(2) 0.02291(9) Uani 1 1 d D . .
C14B C 0.24301(17) 0.16863(17) 0.19928(10) 0.0350(4) Uani 1 1 d D . .
H14D H 0.2837(18) 0.2274(18) 0.2314(12) 0.053 Uiso 1 1 d D . .
H14E H 0.2147(18) 0.1080(18) 0.2297(12) 0.053 Uiso 1 1 d D . .
H14F H 0.1796(19) 0.1898(17) 0.1749(12) 0.053 Uiso 1 1 d D . .
C15B C 0.46436(18) 0.09869(19) 0.18125(13) 0.0435(5) Uani 1 1 d D . .
H15D H 0.520(2) 0.0916(19) 0.1498(13) 0.065 Uiso 1 1 d D . .
H15E H 0.4439(19) 0.032(2) 0.2068(13) 0.065 Uiso 1 1 d D . .
H15F H 0.499(2) 0.153(2) 0.2174(13) 0.065 Uiso 1 1 d D . .
C16B C 0.26113(16) 0.03064(14) 0.06223(10) 0.0339(4) Uani 1 1 d D . .
C17B C 0.2049(3) -0.07109(19) 0.10156(14) 0.0638(8) Uani 1 1 d D . .
H17D H 0.147(2) -0.056(2) 0.1329(16) 0.096 Uiso 1 1 d D . .
H17E H 0.261(2) -0.100(2) 0.1340(16) 0.096 Uiso 1 1 d D . .
H17F H 0.169(2) -0.127(2) 0.0666(16) 0.096 Uiso 1 1 d D . .
C18B C 0.3440(2) 0.00072(19) 0.01135(14) 0.0533(6) Uani 1 1 d D . .
H18D H 0.302(2) -0.051(2) -0.0269(14) 0.080 Uiso 1 1 d D . .
H18E H 0.404(2) -0.029(2) 0.0387(14) 0.080 Uiso 1 1 d D . .
H18F H 0.384(2) 0.064(2) -0.0124(14) 0.080 Uiso 1 1 d D . .
C19B C 0.1702(2) 0.0744(2) 0.01644(14) 0.0548(6) Uani 1 1 d D . .
H19D H 0.203(2) 0.143(2) -0.0100(14) 0.082 Uiso 1 1 d D . .
H19E H 0.115(2) 0.093(2) 0.0461(15) 0.082 Uiso 1 1 d D . .
H19F H 0.129(2) 0.021(2) -0.0190(15) 0.082 Uiso 1 1 d D . .
C31B C 0.20201(12) 0.60311(11) 0.11154(8) 0.0185(3) Uani 1 1 d D . .
C32B C 0.18171(13) 0.62925(14) 0.18237(8) 0.0251(3) Uani 1 1 d D . .
H32B H 0.2344(15) 0.6198(14) 0.2215(10) 0.030 Uiso 1 1 d D . .
C33B C 0.08562(14) 0.66728(14) 0.19590(8) 0.0270(3) Uani 1 1 d D . .
H33B H 0.0740(15) 0.6850(14) 0.2445(10) 0.032 Uiso 1 1 d D . .
C34B C 0.00961(13) 0.67886(13) 0.13780(8) 0.0236(3) Uani 1 1 d D . .
C35B C 0.02626(15) 0.65216(16) 0.06687(9) 0.0324(4) Uani 1 1 d D . .
H35B H -0.0266(16) 0.6622(15) 0.0280(10) 0.039 Uiso 1 1 d D . .
C36B C 0.12305(14) 0.61508(15) 0.05427(9) 0.0300(4) Uani 1 1 d D . .
H36B H 0.1364(15) 0.5979(15) 0.0055(10) 0.036 Uiso 1 1 d D . .
Br1B Br -0.117918(15) 0.737728(18) 0.154763(10) 0.04046(5) Uani 1 1 d D . .
C41B C 0.52612(12) 0.76361(12) 0.21391(8) 0.0228(3) Uani 1 1 d D . .
C42B C 0.59710(16) 0.86637(15) 0.21565(11) 0.0376(4) Uani 1 1 d D . .
H42B H 0.6071(17) 0.9020(16) 0.1711(11) 0.045 Uiso 1 1 d D . .
C43B C 0.64850(18) 0.91511(19) 0.28188(13) 0.0502(6) Uani 1 1 d D . .
H43B H 0.692(2) 0.9825(19) 0.2811(12) 0.060 Uiso 1 1 d D . .
C44B C 0.62995(17) 0.86267(19) 0.34657(12) 0.0484(6) Uani 1 1 d D . .
H44B H 0.6674(19) 0.8958(18) 0.3920(12) 0.058 Uiso 1 1 d D . .
C45B C 0.56021(16) 0.76150(18) 0.34547(10) 0.0382(4) Uani 1 1 d D . .
H45B H 0.5463(17) 0.7215(16) 0.3890(11) 0.046 Uiso 1 1 d D . .
C46B C 0.50794(14) 0.71148(15) 0.27955(9) 0.0271(3) Uani 1 1 d D . .
H46B H 0.4627(15) 0.6416(15) 0.2797(10) 0.032 Uiso 1 1 d D . .

loop_
 _atom_site_aniso_label
 _atom_site_aniso_U_11
 _atom_site_aniso_U_22
 _atom_site_aniso_U_33
 _atom_site_aniso_U_23
 _atom_site_aniso_U_13
 _atom_site_aniso_U_12
C1A 0.0176(7) 0.0200(7) 0.0145(6) 0.0000(5) 0.0019(5) 0.0028(6)
C2A 0.0178(7) 0.0202(8) 0.0193(7) -0.0015(6) 0.0022(5) 0.0042(6)
C3A 0.0177(7) 0.0194(7) 0.0149(6) -0.0001(5) 0.0012(5) 0.0045(6)
N4A 0.0161(6) 0.0174(6) 0.0181(5) -0.0017(5) 0.0014(4) 0.0059(5)
C5A 0.0195(7) 0.0173(7) 0.0192(7) 0.0001(5) 0.0023(5) 0.0040(6)
C6A 0.0234(8) 0.0208(8) 0.0217(7) 0.0005(6) 0.0066(6) 0.0010(6)
C7A 0.0179(7) 0.0238(8) 0.0154(6) 0.0001(5) 0.0017(5) 0.0028(6)
N8A 0.0163(6) 0.0183(6) 0.0175(5) -0.0008(5) 0.0038(4) 0.0048(5)
O9A 0.0225(5) 0.0288(6) 0.0238(5) -0.0025(4) 0.0080(4) 0.0046(5)
C10A 0.0204(7) 0.0200(7) 0.0153(6) 0.0004(5) 0.0025(5) 0.0043(6)
O10A 0.0235(5) 0.0181(5) 0.0210(5) -0.0016(4) -0.0004(4) 0.0037(4)
C11A 0.0222(7) 0.0209(8) 0.0212(7) 0.0014(6) 0.0026(6) 0.0071(6)
O11A 0.0266(6) 0.0343(7) 0.0312(6) -0.0074(5) 0.0046(5) 0.0123(5)
O12A 0.0197(5) 0.0315(6) 0.0231(5) -0.0043(4) -0.0018(4) 0.0098(5)
C13A 0.0208(8) 0.0459(12) 0.0408(10) -0.0084(9) -0.0032(7) 0.0107(8)
Si1A 0.0240(2) 0.0179(2) 0.02056(19) -0.00076(16) 0.00133(16) 0.00622(17)
C14A 0.0339(9) 0.0315(10) 0.0327(9) 0.0039(7) -0.0015(7) 0.0130(8)
C15A 0.0391(10) 0.0268(9) 0.0310(9) -0.0080(7) 0.0046(8) 0.0100(8)
C16A 0.0259(8) 0.0221(8) 0.0267(8) 0.0032(6) 0.0036(6) 0.0031(6)
C17A 0.0407(11) 0.0274(10) 0.0501(12) 0.0076(9) 0.0051(9) -0.0001(8)
C18A 0.0236(8) 0.0342(10) 0.0337(9) 0.0025(8) -0.0019(7) 0.0029(7)
C19A 0.0344(10) 0.0411(11) 0.0276(8) 0.0057(8) 0.0088(7) 0.0100(8)
C31A 0.0169(6) 0.0175(7) 0.0179(6) -0.0010(5) 0.0017(5) 0.0032(5)
C32A 0.0229(7) 0.0306(9) 0.0192(7) 0.0052(6) 0.0029(6) 0.0105(7)
C33A 0.0225(7) 0.0349(9) 0.0201(7) 0.0021(6) 0.0061(6) 0.0087(7)
C34A 0.0165(7) 0.0225(8) 0.0275(7) -0.0011(6) 0.0012(6) 0.0054(6)
C35A 0.0302(9) 0.0399(10) 0.0243(8) 0.0080(7) 0.0005(7) 0.0182(8)
C36A 0.0286(8) 0.0384(10) 0.0192(7) 0.0053(7) 0.0062(6) 0.0143(7)
Br1A 0.02225(8) 0.04650(11) 0.04038(10) 0.00446(8) 0.00520(7) 0.01708(8)
C41A 0.0173(7) 0.0219(8) 0.0205(7) -0.0034(6) 0.0020(5) 0.0064(6)
C42A 0.0320(9) 0.0233(9) 0.0302(8) -0.0021(7) 0.0039(7) 0.0039(7)
C43A 0.0373(10) 0.0288(10) 0.0392(10) -0.0142(8) -0.0014(8) -0.0022(8)
C44A 0.0324(9) 0.0459(11) 0.0250(8) -0.0142(8) -0.0017(7) 0.0061(8)
C45A 0.0256(8) 0.0385(10) 0.0201(7) -0.0020(7) 0.0024(6) 0.0081(7)
C46A 0.0198(7) 0.0245(8) 0.0214(7) -0.0026(6) 0.0030(6) 0.0041(6)
C1B 0.0213(7) 0.0192(7) 0.0172(6) 0.0014(5) 0.0046(5) 0.0033(6)
C2B 0.0206(7) 0.0187(8) 0.0234(7) 0.0001(6) 0.0047(6) 0.0042(6)
C3B 0.0203(7) 0.0202(7) 0.0165(6) 0.0001(5) 0.0031(5) 0.0045(6)
N4B 0.0182(6) 0.0163(6) 0.0202(6) -0.0004(5) 0.0030(5) 0.0055(5)
C5B 0.0227(7) 0.0178(7) 0.0217(7) 0.0007(6) 0.0029(6) 0.0046(6)
C6B 0.0270(8) 0.0213(8) 0.0225(7) 0.0011(6) 0.0076(6) 0.0018(6)
C7B 0.0211(7) 0.0231(8) 0.0168(6) 0.0000(6) 0.0029(5) 0.0021(6)
N8B 0.0188(6) 0.0169(6) 0.0205(6) 0.0003(5) 0.0051(5) 0.0049(5)
O9B 0.0269(6) 0.0274(6) 0.0266(5) 0.0004(5) 0.0112(5) 0.0058(5)
C10B 0.0228(7) 0.0188(7) 0.0177(6) 0.0014(5) 0.0048(5) 0.0039(6)
O10B 0.0271(5) 0.0167(5) 0.0230(5) 0.0008(4) 0.0033(4) 0.0035(4)
C11B 0.0249(7) 0.0207(8) 0.0233(7) 0.0035(6) 0.0061(6) 0.0062(6)
O11B 0.0317(6) 0.0322(7) 0.0347(6) -0.0059(5) 0.0082(5) 0.0130(5)
O12B 0.0210(5) 0.0308(6) 0.0262(5) -0.0020(5) 0.0021(4) 0.0094(5)
C13B 0.0229(8) 0.0451(12) 0.0411(10) -0.0045(9) 0.0011(7) 0.0112(8)
Si1B 0.0261(2) 0.0186(2) 0.0249(2) 0.00353(16) 0.00528(17) 0.00553(17)
C14B 0.0418(11) 0.0348(10) 0.0309(9) 0.0035(8) 0.0143(8) 0.0094(9)
C15B 0.0380(11) 0.0431(12) 0.0518(12) 0.0231(10) 0.0032(9) 0.0134(9)
C16B 0.0417(10) 0.0215(9) 0.0350(9) -0.0021(7) 0.0102(8) -0.0034(7)
C17B 0.095(2) 0.0295(12) 0.0532(14) -0.0030(10) 0.0222(13) -0.0220(13)
C18B 0.0697(16) 0.0390(13) 0.0512(13) -0.0127(10) 0.0244(12) 0.0051(11)
C19B 0.0477(13) 0.0586(15) 0.0494(13) -0.0122(11) -0.0121(10) -0.0004(12)
C31B 0.0199(7) 0.0159(7) 0.0198(7) 0.0016(5) 0.0030(5) 0.0038(6)
C32B 0.0248(8) 0.0349(9) 0.0180(7) 0.0020(6) 0.0001(6) 0.0120(7)
C33B 0.0287(8) 0.0378(10) 0.0183(7) 0.0016(6) 0.0045(6) 0.0147(7)
C34B 0.0200(7) 0.0247(8) 0.0279(8) 0.0038(6) 0.0036(6) 0.0083(6)
C35B 0.0281(9) 0.0476(11) 0.0240(8) -0.0020(7) -0.0056(7) 0.0169(8)
C36B 0.0318(9) 0.0421(10) 0.0188(7) -0.0050(7) -0.0005(6) 0.0151(8)
Br1B 0.03188(9) 0.06002(13) 0.03827(10) 0.00701(9) 0.00604(7) 0.02785(9)
C41B 0.0198(7) 0.0234(8) 0.0261(7) -0.0058(6) 0.0016(6) 0.0074(6)
C42B 0.0378(10) 0.0293(10) 0.0423(10) -0.0089(8) 0.0054(8) -0.0001(8)
C43B 0.0397(11) 0.0427(12) 0.0604(14) -0.0274(11) 0.0023(10) -0.0056(9)
C44B 0.0326(10) 0.0671(15) 0.0439(12) -0.0324(11) -0.0080(9) 0.0130(10)
C45B 0.0355(10) 0.0579(13) 0.0259(8) -0.0090(8) -0.0027(7) 0.0233(9)
C46B 0.0262(8) 0.0326(9) 0.0242(8) -0.0041(7) 0.0004(6) 0.0111(7)

_geom_special_details
;
 All esds (except the esd in the dihedral angle between two l.s. planes)
 are estimated using the full covariance matrix.  The cell esds are taken
 into account individually in the estimation of esds in distances, angles
 and torsion angles; correlations between esds in cell parameters are only
 used when they are defined by crystal symmetry.  An approximate (isotropic)
 treatment of cell esds is used for estimating esds involving l.s. planes.
;

loop_
 _geom_bond_atom_site_label_1
 _geom_bond_atom_site_label_2
 _geom_bond_distance
 _geom_bond_site_symmetry_2
 _geom_bond_publ_flag
C1A C10A 1.337(2) . ?
C1A N8A 1.4163(18) . ?
C1A C2A 1.513(2) . ?
C2A C3A 1.542(2) . ?
C2A H2A 0.950(17) . ?
C2A H2B 0.972(16) . ?
C3A N4A 1.4928(18) . ?
C3A C31A 1.5085(19) . ?
C3A H3A 0.990(16) . ?
N4A N8A 1.4566(15) . ?
N4A C5A 1.4833(18) . ?
C5A C41A 1.522(2) . ?
C5A C6A 1.5397(19) . ?
C5A H5A 0.981(16) . ?
C6A C7A 1.512(2) . ?
C6A H6A 0.936(18) . ?
C6A H6B 0.936(17) . ?
C7A O9A 1.2103(17) . ?
C7A N8A 1.4047(17) . ?
C10A O10A 1.3686(17) . ?
C10A C11A 1.492(2) . ?
O10A Si1A 1.6670(11) . ?
C11A O11A 1.2129(17) . ?
C11A O12A 1.3354(18) . ?
O12A C13A 1.4471(19) . ?
C13A H13A 0.93(2) . ?
C13A H13B 0.95(2) . ?
C13A H13C 0.94(2) . ?
Si1A C15A 1.8573(17) . ?
Si1A C14A 1.8613(18) . ?
Si1A C16A 1.8803(16) . ?
C14A H14A 0.93(2) . ?
C14A H14B 0.96(2) . ?
C14A H14C 0.95(2) . ?
C15A H15A 0.95(2) . ?
C15A H15B 0.95(2) . ?
C15A H15C 0.98(2) . ?
C16A C17A 1.539(2) . ?
C16A C18A 1.539(2) . ?
C16A C19A 1.540(2) . ?
C17A H17A 0.99(2) . ?
C17A H17B 0.96(2) . ?
C17A H17C 0.98(2) . ?
C18A H18A 0.97(2) . ?
C18A H18B 0.98(2) . ?
C18A H18C 0.97(2) . ?
C19A H19A 0.98(2) . ?
C19A H19B 0.99(2) . ?
C19A H19C 0.98(2) . ?
C31A C36A 1.386(2) . ?
C31A C32A 1.3918(19) . ?
C32A C33A 1.391(2) . ?
C32A H32A 0.953(17) . ?
C33A C34A 1.379(2) . ?
C33A H33A 0.939(17) . ?
C34A C35A 1.382(2) . ?
C34A Br1A 1.9018(14) . ?
C35A C36A 1.393(2) . ?
C35A H35A 0.917(19) . ?
C36A H36A 0.962(18) . ?
C41A C46A 1.389(2) . ?
C41A C42A 1.396(2) . ?
C42A C43A 1.387(2) . ?
C42A H42A 0.938(18) . ?
C43A C44A 1.386(3) . ?
C43A H43A 0.93(2) . ?
C44A C45A 1.381(3) . ?
C44A H44A 0.970(19) . ?
C45A C46A 1.392(2) . ?
C45A H45A 0.952(18) . ?
C46A H46A 0.954(17) . ?
C1B C10B 1.335(2) . ?
C1B N8B 1.4202(19) . ?
C1B C2B 1.512(2) . ?
C2B C3B 1.543(2) . ?
C2B H2C 0.965(17) . ?
C2B H2D 0.949(17) . ?
C3B N4B 1.4871(19) . ?
C3B C31B 1.5102(19) . ?
C3B H3B 0.962(16) . ?
N4B N8B 1.4578(16) . ?
N4B C5B 1.4863(19) . ?
C5B C41B 1.524(2) . ?
C5B C6B 1.538(2) . ?
C5B H5B 0.978(17) . ?
C6B C7B 1.509(2) . ?
C6B H6C 0.941(17) . ?
C6B H6D 0.922(18) . ?
C7B O9B 1.2108(17) . ?
C7B N8B 1.4012(18) . ?
C10B O10B 1.3769(18) . ?
C10B C11B 1.496(2) . ?
O10B Si1B 1.6773(11) . ?
C11B O11B 1.2084(17) . ?
C11B O12B 1.3388(18) . ?
O12B C13B 1.452(2) . ?
C13B H13D 0.97(2) . ?
C13B H13E 0.96(2) . ?
C13B H13F 0.94(2) . ?
Si1B C15B 1.853(2) . ?
Si1B C14B 1.8563(18) . ?
Si1B C16B 1.8797(18) . ?
C14B H14D 0.96(2) . ?
C14B H14E 0.97(2) . ?
C14B H14F 0.94(2) . ?
C15B H15D 0.94(2) . ?
C15B H15E 0.97(2) . ?
C15B H15F 0.95(2) . ?
C16B C18B 1.528(3) . ?
C16B C19B 1.530(3) . ?
C16B C17B 1.537(3) . ?
C17B H17D 0.99(3) . ?
C17B H17E 0.99(3) . ?
C17B H17F 0.96(3) . ?
C18B H18D 0.98(3) . ?
C18B H18E 0.98(3) . ?
C18B H18F 0.97(3) . ?
C19B H19D 1.02(3) . ?
C19B H19E 0.96(3) . ?
C19B H19F 0.96(3) . ?
C31B C36B 1.390(2) . ?
C31B C32B 1.391(2) . ?
C32B C33B 1.392(2) . ?
C32B H32B 0.945(18) . ?
C33B C34B 1.377(2) . ?
C33B H33B 0.945(18) . ?
C34B C35B 1.381(2) . ?
C34B Br1B 1.9009(15) . ?
C35B C36B 1.389(2) . ?
C35B H35B 0.945(19) . ?
C36B H36B 0.953(18) . ?
C41B C46B 1.388(2) . ?
C41B C42B 1.394(2) . ?
C42B C43B 1.389(3) . ?
C42B H42B 0.94(2) . ?
C43B C44B 1.375(3) . ?
C43B H43B 0.90(2) . ?
C44B C45B 1.372(3) . ?
C44B H44B 0.96(2) . ?
C45B C46B 1.393(2) . ?
C45B H45B 0.96(2) . ?
C46B H46B 0.935(18) . ?

loop_
 _geom_angle_atom_site_label_1
 _geom_angle_atom_site_label_2
 _geom_angle_atom_site_label_3
 _geom_angle
 _geom_angle_site_symmetry_1
 _geom_angle_site_symmetry_3
 _geom_angle_publ_flag
C10A C1A N8A 125.07(13) . . ?
C10A C1A C2A 127.05(13) . . ?
N8A C1A C2A 107.46(12) . . ?
C1A C2A C3A 102.35(11) . . ?
C1A C2A H2A 111.2(10) . . ?
C3A C2A H2A 112.0(10) . . ?
C1A C2A H2B 111.1(10) . . ?
C3A C2A H2B 111.1(10) . . ?
H2A C2A H2B 109.0(14) . . ?
N4A C3A C31A 111.72(11) . . ?
N4A C3A C2A 99.91(11) . . ?
C31A C3A C2A 115.96(12) . . ?
N4A C3A H3A 111.1(9) . . ?
C31A C3A H3A 109.0(9) . . ?
C2A C3A H3A 109.0(9) . . ?
N8A N4A C5A 103.87(10) . . ?
N8A N4A C3A 102.06(10) . . ?
C5A N4A C3A 116.18(11) . . ?
N4A C5A C41A 110.67(11) . . ?
N4A C5A C6A 105.40(11) . . ?
C41A C5A C6A 112.99(12) . . ?
N4A C5A H5A 107.3(10) . . ?
C41A C5A H5A 109.9(9) . . ?
C6A C5A H5A 110.3(9) . . ?
C7A C6A C5A 104.36(12) . . ?
C7A C6A H6A 111.8(11) . . ?
C5A C6A H6A 112.9(10) . . ?
C7A C6A H6B 106.7(10) . . ?
C5A C6A H6B 112.4(10) . . ?
H6A C6A H6B 108.5(14) . . ?
O9A C7A N8A 124.07(14) . . ?
O9A C7A C6A 128.77(13) . . ?
N8A C7A C6A 107.16(11) . . ?
C7A N8A C1A 121.45(11) . . ?
C7A N8A N4A 111.23(11) . . ?
C1A N8A N4A 106.59(10) . . ?
C1A C10A O10A 117.91(13) . . ?
C1A C10A C11A 125.92(13) . . ?
O10A C10A C11A 115.35(12) . . ?
C10A O10A Si1A 131.55(9) . . ?
O11A C11A O12A 124.66(14) . . ?
O11A C11A C10A 122.62(14) . . ?
O12A C11A C10A 112.67(12) . . ?
C11A O12A C13A 114.84(12) . . ?
O12A C13A H13A 109.8(14) . . ?
O12A C13A H13B 107.0(13) . . ?
H13A C13A H13B 110.1(18) . . ?
O12A C13A H13C 108.7(13) . . ?
H13A C13A H13C 111.2(18) . . ?
H13B C13A H13C 109.9(18) . . ?
O10A Si1A C15A 104.24(7) . . ?
O10A Si1A C14A 111.96(8) . . ?
C15A Si1A C14A 112.81(9) . . ?
O10A Si1A C16A 105.42(6) . . ?
C15A Si1A C16A 111.57(8) . . ?
C14A Si1A C16A 110.46(8) . . ?
Si1A C14A H14A 112.3(13) . . ?
Si1A C14A H14B 108.7(12) . . ?
H14A C14A H14B 107.6(17) . . ?
Si1A C14A H14C 112.9(12) . . ?
H14A C14A H14C 104.8(17) . . ?
H14B C14A H14C 110.3(17) . . ?
Si1A C15A H15A 110.1(12) . . ?
Si1A C15A H15B 112.6(12) . . ?
H15A C15A H15B 107.6(17) . . ?
Si1A C15A H15C 110.0(12) . . ?
H15A C15A H15C 108.0(17) . . ?
H15B C15A H15C 108.3(17) . . ?
C17A C16A C18A 108.81(15) . . ?
C17A C16A C19A 109.74(15) . . ?
C18A C16A C19A 108.77(14) . . ?
C17A C16A Si1A 110.70(12) . . ?
C18A C16A Si1A 109.34(11) . . ?
C19A C16A Si1A 109.45(12) . . ?
C16A C17A H17A 111.9(13) . . ?
C16A C17A H17B 111.6(14) . . ?
H17A C17A H17B 105.4(18) . . ?
C16A C17A H17C 111.3(13) . . ?
H17A C17A H17C 109.8(18) . . ?
H17B C17A H17C 106.6(18) . . ?
C16A C18A H18A 110.1(12) . . ?
C16A C18A H18B 112.4(12) . . ?
H18A C18A H18B 107.5(16) . . ?
C16A C18A H18C 112.6(12) . . ?
H18A C18A H18C 106.0(16) . . ?
H18B C18A H18C 107.8(16) . . ?
C16A C19A H19A 110.8(12) . . ?
C16A C19A H19B 110.8(12) . . ?
H19A C19A H19B 110.1(17) . . ?
C16A C19A H19C 110.1(12) . . ?
H19A C19A H19C 107.5(17) . . ?
H19B C19A H19C 107.3(17) . . ?
C36A C31A C32A 118.87(13) . . ?
C36A C31A C3A 119.64(12) . . ?
C32A C31A C3A 121.50(13) . . ?
C33A C32A C31A 121.04(14) . . ?
C33A C32A H32A 120.4(10) . . ?
C31A C32A H32A 118.5(10) . . ?
C34A C33A C32A 118.70(14) . . ?
C34A C33A H33A 120.1(11) . . ?
C32A C33A H33A 121.2(11) . . ?
C33A C34A C35A 121.66(14) . . ?
C33A C34A Br1A 119.68(11) . . ?
C35A C34A Br1A 118.64(12) . . ?
C34A C35A C36A 118.88(14) . . ?
C34A C35A H35A 120.2(11) . . ?
C36A C35A H35A 120.9(11) . . ?
C31A C36A C35A 120.85(14) . . ?
C31A C36A H36A 119.7(11) . . ?
C35A C36A H36A 119.5(11) . . ?
C46A C41A C42A 118.59(14) . . ?
C46A C41A C5A 121.65(13) . . ?
C42A C41A C5A 119.76(14) . . ?
C43A C42A C41A 120.81(16) . . ?
C43A C42A H42A 120.9(11) . . ?
C41A C42A H42A 118.2(11) . . ?
C44A C43A C42A 120.19(17) . . ?
C44A C43A H43A 120.0(12) . . ?
C42A C43A H43A 119.8(12) . . ?
C45A C44A C43A 119.34(16) . . ?
C45A C44A H44A 119.5(12) . . ?
C43A C44A H44A 121.2(12) . . ?
C44A C45A C46A 120.77(16) . . ?
C44A C45A H45A 120.7(11) . . ?
C46A C45A H45A 118.5(11) . . ?
C41A C46A C45A 120.30(15) . . ?
C41A C46A H46A 119.4(10) . . ?
C45A C46A H46A 120.3(10) . . ?
C10B C1B N8B 125.30(13) . . ?
C10B C1B C2B 126.98(14) . . ?
N8B C1B C2B 107.43(12) . . ?
C1B C2B C3B 102.35(12) . . ?
C1B C2B H2C 111.2(10) . . ?
C3B C2B H2C 109.5(10) . . ?
C1B C2B H2D 111.8(10) . . ?
C3B C2B H2D 113.3(10) . . ?
H2C C2B H2D 108.6(14) . . ?
N4B C3B C31B 112.19(11) . . ?
N4B C3B C2B 100.15(11) . . ?
C31B C3B C2B 115.21(12) . . ?
N4B C3B H3B 109.9(10) . . ?
C31B C3B H3B 110.4(10) . . ?
C2B C3B H3B 108.6(10) . . ?
N8B N4B C5B 103.87(10) . . ?
N8B N4B C3B 102.42(10) . . ?
C5B N4B C3B 116.31(11) . . ?
N4B C5B C41B 110.80(12) . . ?
N4B C5B C6B 105.45(12) . . ?
C41B C5B C6B 112.99(13) . . ?
N4B C5B H5B 107.7(10) . . ?
C41B C5B H5B 109.4(10) . . ?
C6B C5B H5B 110.4(10) . . ?
C7B C6B C5B 104.52(12) . . ?
C7B C6B H6C 107.5(11) . . ?
C5B C6B H6C 111.6(10) . . ?
C7B C6B H6D 110.8(11) . . ?
C5B C6B H6D 113.8(11) . . ?
H6C C6B H6D 108.4(15) . . ?
O9B C7B N8B 124.06(14) . . ?
O9B C7B C6B 128.70(13) . . ?
N8B C7B C6B 107.24(12) . . ?
C7B N8B C1B 121.91(11) . . ?
C7B N8B N4B 111.65(11) . . ?
C1B N8B N4B 106.71(10) . . ?
C1B C10B O10B 118.78(13) . . ?
C1B C10B C11B 125.96(14) . . ?
O10B C10B C11B 114.61(12) . . ?
C10B O10B Si1B 123.99(9) . . ?
O11B C11B O12B 124.64(14) . . ?
O11B C11B C10B 123.06(14) . . ?
O12B C11B C10B 112.26(12) . . ?
C11B O12B C13B 114.51(12) . . ?
O12B C13B H13D 110.1(13) . . ?
O12B C13B H13E 106.5(13) . . ?
H13D C13B H13E 110.1(18) . . ?
O12B C13B H13F 107.8(13) . . ?
H13D C13B H13F 112.6(18) . . ?
H13E C13B H13F 109.6(18) . . ?
O10B Si1B C15B 109.48(8) . . ?
O10B Si1B C14B 108.73(7) . . ?
C15B Si1B C14B 110.13(10) . . ?
O10B Si1B C16B 103.42(7) . . ?
C15B Si1B C16B 112.85(10) . . ?
C14B Si1B C16B 111.95(9) . . ?
Si1B C14B H14D 109.6(13) . . ?
Si1B C14B H14E 112.6(12) . . ?
H14D C14B H14E 107.5(17) . . ?
Si1B C14B H14F 110.7(13) . . ?
H14D C14B H14F 108.3(18) . . ?
H14E C14B H14F 108.0(18) . . ?
Si1B C15B H15D 112.8(14) . . ?
Si1B C15B H15E 111.9(14) . . ?
H15D C15B H15E 108.1(19) . . ?
Si1B C15B H15F 110.0(15) . . ?
H15D C15B H15F 107(2) . . ?
H15E C15B H15F 106.5(19) . . ?
C18B C16B C19B 108.93(18) . . ?
C18B C16B C17B 108.89(18) . . ?
C19B C16B C17B 109.7(2) . . ?
C18B C16B Si1B 110.37(14) . . ?
C19B C16B Si1B 109.69(14) . . ?
C17B C16B Si1B 109.22(14) . . ?
C16B C17B H17D 111.5(17) . . ?
C16B C17B H17E 112.4(17) . . ?
H17D C17B H17E 107(2) . . ?
C16B C17B H17F 110.3(17) . . ?
H17D C17B H17F 108(2) . . ?
H17E C17B H17F 108(2) . . ?
C16B C18B H18D 109.4(15) . . ?
C16B C18B H18E 111.5(15) . . ?
H18D C18B H18E 111(2) . . ?
C16B C18B H18F 111.0(15) . . ?
H18D C18B H18F 108(2) . . ?
H18E C18B H18F 105(2) . . ?
C16B C19B H19D 112.5(15) . . ?
C16B C19B H19E 111.8(16) . . ?
H19D C19B H19E 106(2) . . ?
C16B C19B H19F 110.7(16) . . ?
H19D C19B H19F 109(2) . . ?
H19E C19B H19F 106(2) . . ?
C36B C31B C32B 118.21(14) . . ?
C36B C31B C3B 119.56(13) . . ?
C32B C31B C3B 122.22(13) . . ?
C31B C32B C33B 121.21(14) . . ?
C31B C32B H32B 118.4(10) . . ?
C33B C32B H32B 120.4(10) . . ?
C34B C33B C32B 119.01(14) . . ?
C34B C33B H33B 121.3(11) . . ?
C32B C33B H33B 119.6(11) . . ?
C33B C34B C35B 121.31(14) . . ?
C33B C34B Br1B 119.51(11) . . ?
C35B C34B Br1B 119.14(12) . . ?
C34B C35B C36B 118.93(15) . . ?
C34B C35B H35B 119.4(11) . . ?
C36B C35B H35B 121.6(11) . . ?
C35B C36B C31B 121.33(14) . . ?
C35B C36B H36B 119.8(11) . . ?
C31B C36B H36B 118.9(11) . . ?
C46B C41B C42B 118.63(16) . . ?
C46B C41B C5B 122.01(14) . . ?
C42B C41B C5B 119.36(15) . . ?
C43B C42B C41B 120.43(19) . . ?
C43B C42B H42B 121.5(13) . . ?
C41B C42B H42B 118.0(13) . . ?
C44B C43B C42B 120.4(2) . . ?
C44B C43B H43B 121.5(15) . . ?
C42B C43B H43B 118.1(15) . . ?
C45B C44B C43B 119.59(18) . . ?
C45B C44B H44B 120.3(13) . . ?
C43B C44B H44B 120.1(13) . . ?
C44B C45B C46B 120.71(19) . . ?
C44B C45B H45B 122.3(12) . . ?
C46B C45B H45B 116.9(13) . . ?
C41B C46B C45B 120.20(17) . . ?
C41B C46B H46B 120.3(11) . . ?
C45B C46B H46B 119.5(11) . . ?

loop_
 _geom_torsion_atom_site_label_1
 _geom_torsion_atom_site_label_2
 _geom_torsion_atom_site_label_3
 _geom_torsion_atom_site_label_4
 _geom_torsion
 _geom_torsion_site_symmetry_1
 _geom_torsion_site_symmetry_2
 _geom_torsion_site_symmetry_3
 _geom_torsion_site_symmetry_4
 _geom_torsion_publ_flag
C10A C1A C2A C3A 160.52(14) . . . . ?
N8A C1A C2A C3A -12.32(14) . . . . ?
C1A C2A C3A N4A 35.35(12) . . . . ?
C1A C2A C3A C31A 155.54(12) . . . . ?
C31A C3A N4A N8A -169.14(11) . . . . ?
C2A C3A N4A N8A -45.91(12) . . . . ?
C31A C3A N4A C5A 78.64(14) . . . . ?
C2A C3A N4A C5A -158.13(11) . . . . ?
N8A N4A C5A C41A 94.74(12) . . . . ?
C3A N4A C5A C41A -154.08(11) . . . . ?
N8A N4A C5A C6A -27.73(14) . . . . ?
C3A N4A C5A C6A 83.44(14) . . . . ?
N4A C5A C6A C7A 19.76(15) . . . . ?
C41A C5A C6A C7A -101.22(14) . . . . ?
C5A C6A C7A O9A 176.06(15) . . . . ?
C5A C6A C7A N8A -3.85(15) . . . . ?
O9A C7A N8A C1A 39.2(2) . . . . ?
C6A C7A N8A C1A -140.87(13) . . . . ?
O9A C7A N8A N4A 165.84(13) . . . . ?
C6A C7A N8A N4A -14.24(15) . . . . ?
C10A C1A N8A C7A -61.04(19) . . . . ?
C2A C1A N8A C7A 111.98(14) . . . . ?
C10A C1A N8A N4A 170.27(13) . . . . ?
C2A C1A N8A N4A -16.71(13) . . . . ?
C5A N4A N8A C7A 26.84(14) . . . . ?
C3A N4A N8A C7A -94.33(12) . . . . ?
C5A N4A N8A C1A 161.26(11) . . . . ?
C3A N4A N8A C1A 40.09(13) . . . . ?
N8A C1A C10A O10A 169.19(12) . . . . ?
C2A C1A C10A O10A -2.5(2) . . . . ?
N8A C1A C10A C11A 0.1(2) . . . . ?
C2A C1A C10A C11A -171.52(13) . . . . ?
C1A C10A O10A Si1A 135.02(12) . . . . ?
C11A C10A O10A Si1A -54.77(16) . . . . ?
C1A C10A C11A O11A 141.88(16) . . . . ?
O10A C10A C11A O11A -27.4(2) . . . . ?
C1A C10A C11A O12A -40.4(2) . . . . ?
O10A C10A C11A O12A 150.31(12) . . . . ?
O11A C11A O12A C13A -8.0(2) . . . . ?
C10A C11A O12A C13A 174.35(14) . . . . ?
C10A O10A Si1A C15A 130.45(13) . . . . ?
C10A O10A Si1A C14A 8.20(14) . . . . ?
C10A O10A Si1A C16A -111.94(12) . . . . ?
O10A Si1A C16A C17A -168.42(12) . . . . ?
C15A Si1A C16A C17A -55.88(15) . . . . ?
C14A Si1A C16A C17A 70.45(14) . . . . ?
O10A Si1A C16A C18A -48.56(13) . . . . ?
C15A Si1A C16A C18A 63.99(14) . . . . ?
C14A Si1A C16A C18A -169.69(12) . . . . ?
O10A Si1A C16A C19A 70.50(12) . . . . ?
C15A Si1A C16A C19A -176.96(12) . . . . ?
C14A Si1A C16A C19A -50.63(14) . . . . ?
N4A C3A C31A C36A -134.76(14) . . . . ?
C2A C3A C31A C36A 111.66(16) . . . . ?
N4A C3A C31A C32A 45.12(19) . . . . ?
C2A C3A C31A C32A -68.46(18) . . . . ?
C36A C31A C32A C33A -0.2(2) . . . . ?
C3A C31A C32A C33A 179.93(14) . . . . ?
C31A C32A C33A C34A 0.4(2) . . . . ?
C32A C33A C34A C35A -0.7(2) . . . . ?
C32A C33A C34A Br1A 177.48(12) . . . . ?
C33A C34A C35A C36A 0.8(3) . . . . ?
Br1A C34A C35A C36A -177.40(13) . . . . ?
C32A C31A C36A C35A 0.3(2) . . . . ?
C3A C31A C36A C35A -179.83(15) . . . . ?
C34A C35A C36A C31A -0.6(3) . . . . ?
N4A C5A C41A C46A -1.20(18) . . . . ?
C6A C5A C41A C46A 116.73(15) . . . . ?
N4A C5A C41A C42A 177.77(13) . . . . ?
C6A C5A C41A C42A -64.30(18) . . . . ?
C46A C41A C42A C43A 1.0(2) . . . . ?
C5A C41A C42A C43A -178.05(15) . . . . ?
C41A C42A C43A C44A -0.5(3) . . . . ?
C42A C43A C44A C45A -0.2(3) . . . . ?
C43A C44A C45A C46A 0.4(3) . . . . ?
C42A C41A C46A C45A -0.7(2) . . . . ?
C5A C41A C46A C45A 178.27(13) . . . . ?
C44A C45A C46A C41A 0.1(2) . . . . ?
C10B C1B C2B C3B -161.05(14) . . . . ?
N8B C1B C2B C3B 13.05(14) . . . . ?
C1B C2B C3B N4B -35.46(13) . . . . ?
C1B C2B C3B C31B -156.01(12) . . . . ?
C31B C3B N4B N8B 168.03(11) . . . . ?
C2B C3B N4B N8B 45.33(12) . . . . ?
C31B C3B N4B C5B -79.46(14) . . . . ?
C2B C3B N4B C5B 157.84(11) . . . . ?
N8B N4B C5B C41B -95.88(12) . . . . ?
C3B N4B C5B C41B 152.45(11) . . . . ?
N8B N4B C5B C6B 26.70(14) . . . . ?
C3B N4B C5B C6B -84.97(14) . . . . ?
N4B C5B C6B C7B -19.94(16) . . . . ?
C41B C5B C6B C7B 101.22(15) . . . . ?
C5B C6B C7B O9B -174.78(15) . . . . ?
C5B C6B C7B N8B 5.17(16) . . . . ?
O9B C7B N8B C1B -40.1(2) . . . . ?
C6B C7B N8B C1B 139.95(14) . . . . ?
O9B C7B N8B N4B -167.79(13) . . . . ?
C6B C7B N8B N4B 12.25(16) . . . . ?
C10B C1B N8B C7B 59.8(2) . . . . ?
C2B C1B N8B C7B -114.41(14) . . . . ?
C10B C1B N8B N4B -170.35(13) . . . . ?
C2B C1B N8B N4B 15.43(14) . . . . ?
C5B N4B N8B C7B -24.93(14) . . . . ?
C3B N4B N8B C7B 96.53(13) . . . . ?
C5B N4B N8B C1B -160.40(11) . . . . ?
C3B N4B N8B C1B -38.94(13) . . . . ?
N8B C1B C10B O10B -170.05(12) . . . . ?
C2B C1B C10B O10B 3.0(2) . . . . ?
N8B C1B C10B C11B 0.2(2) . . . . ?
C2B C1B C10B C11B 173.31(14) . . . . ?
C1B C10B O10B Si1B -109.99(14) . . . . ?
C11B C10B O10B Si1B 78.67(14) . . . . ?
C1B C10B C11B O11B -138.18(16) . . . . ?
O10B C10B C11B O11B 32.4(2) . . . . ?
C1B C10B C11B O12B 44.1(2) . . . . ?
O10B C10B C11B O12B -145.26(12) . . . . ?
O11B C11B O12B C13B 6.5(2) . . . . ?
C10B C11B O12B C13B -175.88(14) . . . . ?
C10B O10B Si1B C15B -50.33(14) . . . . ?
C10B O10B Si1B C14B 70.03(13) . . . . ?
C10B O10B Si1B C16B -170.85(11) . . . . ?
O10B Si1B C16B C18B 66.82(16) . . . . ?
C15B Si1B C16B C18B -51.38(17) . . . . ?
C14B Si1B C16B C18B -176.30(15) . . . . ?
O10B Si1B C16B C19B -53.20(15) . . . . ?
C15B Si1B C16B C19B -171.40(15) . . . . ?
C14B Si1B C16B C19B 63.67(16) . . . . ?
O10B Si1B C16B C17B -173.50(16) . . . . ?
C15B Si1B C16B C17B 68.30(19) . . . . ?
C14B Si1B C16B C17B -56.62(19) . . . . ?
N4B C3B C31B C36B 152.06(14) . . . . ?
C2B C3B C31B C36B -94.22(17) . . . . ?
N4B C3B C31B C32B -29.12(19) . . . . ?
C2B C3B C31B C32B 84.60(18) . . . . ?
C36B C31B C32B C33B -0.5(2) . . . . ?
C3B C31B C32B C33B -179.37(15) . . . . ?
C31B C32B C33B C34B 0.1(3) . . . . ?
C32B C33B C34B C35B 0.9(3) . . . . ?
C32B C33B C34B Br1B -176.76(13) . . . . ?
C33B C34B C35B C36B -1.3(3) . . . . ?
Br1B C34B C35B C36B 176.30(14) . . . . ?
C34B C35B C36B C31B 0.9(3) . . . . ?
C32B C31B C36B C35B 0.0(3) . . . . ?
C3B C31B C36B C35B 178.92(16) . . . . ?
N4B C5B C41B C46B -4.34(19) . . . . ?
C6B C5B C41B C46B -122.41(15) . . . . ?
N4B C5B C41B C42B 176.53(14) . . . . ?
C6B C5B C41B C42B 58.45(19) . . . . ?
C46B C41B C42B C43B 0.1(3) . . . . ?
C5B C41B C42B C43B 179.28(17) . . . . ?
C41B C42B C43B C44B -0.1(3) . . . . ?
C42B C43B C44B C45B 0.0(3) . . . . ?
C43B C44B C45B C46B -0.1(3) . . . . ?
C42B C41B C46B C45B -0.1(2) . . . . ?
C5B C41B C46B C45B -179.29(14) . . . . ?
C44B C45B C46B C41B 0.1(3) . . . . ?

_refine_diff_density_max    0.477
_refine_diff_density_min   -0.584
_refine_diff_density_rms    0.054

_shelxl_version_number 2012-4

_shelx_res_file
;
TITL as in P-1
CELL 0.71073  12.0963  12.6843  18.3120  90.5361   94.8492  102.6097
ZERR    4.00   0.0012   0.0013   0.0018   0.0016    0.0017    0.0016
LATT  1
SFAC C  H  N  O  Si Br
UNIT 108 132 8 16 4 4
OMIT   0.00  60.00
L.S. 11
ACTA
BOND $H
FMAP 2
PLAN 20
SIZE 0.145 0.165 0.51
CONF
TEMP -123.000
WGHT    0.010000    1.732000
FVAR       0.09890
MOLE 1
C1A   1    0.103742    0.592269    0.393217    11.00000    0.01759    0.02003 =
         0.01450   -0.00003    0.00188    0.00279
C2A   1    0.224396    0.581351    0.413871    11.00000    0.01780    0.02020 =
         0.01929   -0.00149    0.00216    0.00421
H2A   2    0.251563    0.612526    0.461118    11.00000   -1.20000
H2B   2    0.275224    0.615516    0.378367    11.00000   -1.20000
C3A   1    0.212240    0.457776    0.412021    11.00000    0.01772    0.01943 =
         0.01493   -0.00014    0.00115    0.00449
H3A   2    0.183978    0.428496    0.458536    11.00000   -1.20000
N4A   3    0.122788    0.426821    0.349602    11.00000    0.01615    0.01742 =
         0.01813   -0.00169    0.00137    0.00590
C5A   1    0.056721    0.313426    0.347076    11.00000    0.01945    0.01729 =
         0.01920    0.00007    0.00233    0.00403
H5A   2    0.108364    0.268399    0.366213    11.00000   -1.20000
C6A   1   -0.037768    0.311958    0.398607    11.00000    0.02336    0.02084 =
         0.02168    0.00051    0.00661    0.00100
H6A   2   -0.107370    0.267411    0.380829    11.00000   -1.20000
H6B   2   -0.018005    0.290614    0.445815    11.00000   -1.20000
C7A   1   -0.045690    0.428865    0.405496    11.00000    0.01792    0.02384 =
         0.01539    0.00005    0.00172    0.00277
N8A   3    0.040407    0.489745    0.366586    11.00000    0.01631    0.01831 =
         0.01753   -0.00078    0.00375    0.00480
O9A   4   -0.111795    0.467211    0.437573    11.00000    0.02248    0.02879 =
         0.02382   -0.00252    0.00797    0.00455
C10A  1    0.059907    0.678278    0.405298    11.00000    0.02036    0.01995 =
         0.01534    0.00036    0.00255    0.00426
O10A  4    0.128598    0.765728    0.442517    11.00000    0.02352    0.01811 =
         0.02097   -0.00157   -0.00045    0.00365
C11A  1   -0.062656    0.682203    0.393247    11.00000    0.02222    0.02095 =
         0.02118    0.00137    0.00258    0.00710
O11A  4   -0.108098    0.731892    0.434102    11.00000    0.02663    0.03427 =
         0.03117   -0.00745    0.00461    0.01234
O12A  4   -0.113912    0.628939    0.332018    11.00000    0.01967    0.03151 =
         0.02311   -0.00431   -0.00183    0.00978
C13A  1   -0.235315    0.621472    0.321390    11.00000    0.02080    0.04585 =
         0.04085   -0.00836   -0.00315    0.01066
H13A  2   -0.270970    0.581804    0.358593    11.00000   -1.50000
H13B  2   -0.261180    0.585682    0.275139    11.00000   -1.50000
H13C  2   -0.248803    0.692052    0.320795    11.00000   -1.50000
SI1A  5    0.150538    0.897671    0.427077    11.00000    0.02400    0.01791 =
         0.02056   -0.00076    0.00133    0.00622
C14A  1    0.049490    0.928202    0.352046    11.00000    0.03388    0.03149 =
         0.03272    0.00391   -0.00148    0.01303
H14A  2    0.044757    0.883744    0.310684    11.00000   -1.50000
H14B  2    0.075868    1.001631    0.337807    11.00000   -1.50000
H14C  2   -0.026674    0.917316    0.365423    11.00000   -1.50000
C15A  1    0.134710    0.959733    0.516781    11.00000    0.03907    0.02675 =
         0.03103   -0.00797    0.00465    0.00998
H15A  2    0.060117    0.932515    0.531198    11.00000   -1.50000
H15B  2    0.146353    1.036188    0.515474    11.00000   -1.50000
H15C  2    0.189387    0.941628    0.554556    11.00000   -1.50000
C16A  1    0.300854    0.937603    0.401192    11.00000    0.02591    0.02213 =
         0.02669    0.00323    0.00356    0.00307
C17A  1    0.340511    1.061387    0.400755    11.00000    0.04074    0.02745 =
         0.05014    0.00765    0.00509   -0.00006
H17A  2    0.338565    1.095220    0.449426    11.00000   -1.50000
H17B  2    0.291483    1.093058    0.367676    11.00000   -1.50000
H17C  2    0.417348    1.082984    0.384353    11.00000   -1.50000
C18A  1    0.379906    0.892935    0.457180    11.00000    0.02360    0.03421 =
         0.03368    0.00250   -0.00188    0.00295
H18A  2    0.457983    0.913873    0.444780    11.00000   -1.50000
H18B  2    0.360157    0.813650    0.458628    11.00000   -1.50000
H18C  2    0.379716    0.921397    0.506783    11.00000   -1.50000
C19A  1    0.307885    0.889165    0.324754    11.00000    0.03436    0.04108 =
         0.02759    0.00572    0.00880    0.01004
H19A  2    0.261874    0.919156    0.287429    11.00000   -1.50000
H19B  2    0.283046    0.809268    0.324102    11.00000   -1.50000
H19C  2    0.386763    0.906653    0.311654    11.00000   -1.50000
C31A  1    0.318279    0.418610    0.399081    11.00000    0.01691    0.01751 =
         0.01795   -0.00098    0.00167    0.00322
C32A  1    0.364872    0.430578    0.331910    11.00000    0.02294    0.03058 =
         0.01919    0.00521    0.00290    0.01048
H32A  2    0.328215    0.464310    0.293610    11.00000   -1.20000
C33A  1    0.462786    0.394276    0.320572    11.00000    0.02252    0.03486 =
         0.02006    0.00211    0.00611    0.00869
H33A  2    0.495341    0.403615    0.275673    11.00000   -1.20000
C34A  1    0.512934    0.345236    0.377231    11.00000    0.01646    0.02248 =
         0.02752   -0.00112    0.00124    0.00537
C35A  1    0.469093    0.332632    0.444662    11.00000    0.03016    0.03990 =
         0.02429    0.00798    0.00046    0.01822
H35A  2    0.502620    0.297993    0.481116    11.00000   -1.20000
C36A  1    0.370932    0.369309    0.455028    11.00000    0.02860    0.03844 =
         0.01921    0.00525    0.00620    0.01430
H36A  2    0.339606    0.360621    0.501720    11.00000   -1.20000
BR1A  6    0.643280    0.289552    0.362186    11.00000    0.02225    0.04650 =
         0.04038    0.00446    0.00520    0.01708
C41A  1    0.010735    0.277291    0.268796    11.00000    0.01734    0.02189 =
         0.02051   -0.00342    0.00202    0.00635
C42A  1   -0.050699    0.171519    0.254124    11.00000    0.03196    0.02333 =
         0.03024   -0.00214    0.00390    0.00388
H42A  2   -0.062050    0.124644    0.293412    11.00000   -1.20000
C43A  1   -0.090531    0.135755    0.182950    11.00000    0.03730    0.02878 =
         0.03917   -0.01419   -0.00141   -0.00223
H43A  2   -0.129558    0.064457    0.173929    11.00000   -1.20000
C44A  1   -0.070471    0.205292    0.125258    11.00000    0.03240    0.04589 =
         0.02500   -0.01419   -0.00174    0.00612
H44A  2   -0.098476    0.181704    0.075248    11.00000   -1.20000
C45A  1   -0.010802    0.310354    0.139415    11.00000    0.02556    0.03849 =
         0.02014   -0.00203    0.00237    0.00808
H45A  2    0.002249    0.359970    0.100743    11.00000   -1.20000
C46A  1    0.029758    0.346655    0.210671    11.00000    0.01980    0.02445 =
         0.02140   -0.00262    0.00305    0.00410
H46A  2    0.070015    0.419678    0.220146    11.00000   -1.20000
MOLE 2
C1B   1    0.414439    0.427490    0.117431    11.00000    0.02126    0.01918 =
         0.01722    0.00139    0.00463    0.00332
C2B   1    0.292304    0.437612    0.103127    11.00000    0.02059    0.01868 =
         0.02344    0.00009    0.00470    0.00419
H2C   2    0.249477    0.413828    0.144337    11.00000   -1.20000
H2D   2    0.255599    0.396991    0.060698    11.00000   -1.20000
C3B   1    0.305006    0.560639    0.095500    11.00000    0.02030    0.02017 =
         0.01650    0.00014    0.00307    0.00451
H3B   2    0.325922    0.579633    0.047031    11.00000   -1.20000
N4B   3    0.403619    0.600937    0.150253    11.00000    0.01821    0.01628 =
         0.02020   -0.00039    0.00300    0.00547
C5B   1    0.469682    0.712561    0.140615    11.00000    0.02267    0.01776 =
         0.02172    0.00069    0.00288    0.00464
H5B   2    0.416669    0.754992    0.120053    11.00000   -1.20000
C6B   1    0.555737    0.701342    0.085450    11.00000    0.02696    0.02130 =
         0.02248    0.00112    0.00757    0.00180
H6C   2    0.529000    0.714326    0.037348    11.00000   -1.20000
H6D   2    0.626523    0.745932    0.096134    11.00000   -1.20000
C7B   1    0.562838    0.584128    0.088094    11.00000    0.02107    0.02314 =
         0.01683    0.00001    0.00288    0.00212
N8B   3    0.481725    0.532876    0.134008    11.00000    0.01882    0.01685 =
         0.02047    0.00028    0.00511    0.00490
O9B   4    0.625101    0.538744    0.057549    11.00000    0.02687    0.02741 =
         0.02664    0.00036    0.01119    0.00583
C10B  1    0.454744    0.338497    0.109363    11.00000    0.02279    0.01884 =
         0.01771    0.00141    0.00484    0.00390
O10B  4    0.381120    0.245119    0.082278    11.00000    0.02707    0.01668 =
         0.02301    0.00078    0.00332    0.00349
C11B  1    0.577401    0.332835    0.116438    11.00000    0.02493    0.02069 =
         0.02328    0.00354    0.00611    0.00618
O11B  4    0.617425    0.279386    0.075190    11.00000    0.03171    0.03219 =
         0.03474   -0.00593    0.00820    0.01303
O12B  4    0.635250    0.390071    0.174698    11.00000    0.02101    0.03081 =
         0.02620   -0.00201    0.00212    0.00943
C13B  1    0.756463    0.393557    0.181246    11.00000    0.02290    0.04514 =
         0.04112   -0.00450    0.00105    0.01123
H13D  2    0.769474    0.321107    0.181893    11.00000   -1.50000
H13E  2    0.786762    0.431134    0.226694    11.00000   -1.50000
H13F  2    0.788198    0.433481    0.141896    11.00000   -1.50000
SI1B  5    0.338573    0.136053    0.132384    11.00000    0.02615    0.01860 =
         0.02486    0.00353    0.00528    0.00553
C14B  1    0.243008    0.168630    0.199276    11.00000    0.04179    0.03479 =
         0.03089    0.00353    0.01429    0.00941
H14D  2    0.283708    0.227449    0.231418    11.00000   -1.50000
H14E  2    0.214744    0.107987    0.229734    11.00000   -1.50000
H14F  2    0.179649    0.189789    0.174894    11.00000   -1.50000
C15B  1    0.464364    0.098686    0.181251    11.00000    0.03798    0.04309 =
         0.05180    0.02309    0.00317    0.01337
H15D  2    0.520198    0.091556    0.149842    11.00000   -1.50000
H15E  2    0.443877    0.031875    0.206798    11.00000   -1.50000
H15F  2    0.499005    0.152659    0.217419    11.00000   -1.50000
C16B  1    0.261133    0.030641    0.062227    11.00000    0.04170    0.02147 =
         0.03502   -0.00207    0.01024   -0.00337
C17B  1    0.204908   -0.071090    0.101558    11.00000    0.09495    0.02954 =
         0.05322   -0.00299    0.02220   -0.02198
H17D  2    0.147316   -0.056177    0.132891    11.00000   -1.50000
H17E  2    0.260619   -0.100029    0.133999    11.00000   -1.50000
H17F  2    0.168750   -0.126982    0.066589    11.00000   -1.50000
C18B  1    0.343989    0.000721    0.011348    11.00000    0.06971    0.03898 =
         0.05124   -0.01268    0.02443    0.00506
H18D  2    0.301719   -0.050669   -0.026927    11.00000   -1.50000
H18E  2    0.403532   -0.028780    0.038689    11.00000   -1.50000
H18F  2    0.383954    0.063822   -0.012358    11.00000   -1.50000
C19B  1    0.170183    0.074365    0.016444    11.00000    0.04766    0.05856 =
         0.04936   -0.01218   -0.01207   -0.00044
H19D  2    0.203375    0.142613   -0.009992    11.00000   -1.50000
H19E  2    0.115011    0.092532    0.046067    11.00000   -1.50000
H19F  2    0.128874    0.020941   -0.018985    11.00000   -1.50000
C31B  1    0.202008    0.603112    0.111536    11.00000    0.01994    0.01592 =
         0.01976    0.00164    0.00301    0.00376
C32B  1    0.181712    0.629252    0.182366    11.00000    0.02475    0.03489 =
         0.01796    0.00203    0.00008    0.01202
H32B  2    0.234450    0.619814    0.221499    11.00000   -1.20000
C33B  1    0.085620    0.667283    0.195898    11.00000    0.02872    0.03778 =
         0.01832    0.00155    0.00452    0.01472
H33B  2    0.073985    0.685046    0.244476    11.00000   -1.20000
C34B  1    0.009608    0.678855    0.137797    11.00000    0.02001    0.02471 =
         0.02788    0.00382    0.00357    0.00829
C35B  1    0.026265    0.652165    0.066866    11.00000    0.02806    0.04757 =
         0.02399   -0.00196   -0.00555    0.01695
H35B  2   -0.026596    0.662246    0.027983    11.00000   -1.20000
C36B  1    0.123055    0.615081    0.054270    11.00000    0.03178    0.04214 =
         0.01876   -0.00501   -0.00049    0.01506
H36B  2    0.136405    0.597891    0.005479    11.00000   -1.20000
BR1B  6   -0.117918    0.737728    0.154763    11.00000    0.03188    0.06002 =
         0.03827    0.00701    0.00604    0.02785
C41B  1    0.526118    0.763611    0.213911    11.00000    0.01975    0.02341 =
         0.02611   -0.00575    0.00157    0.00738
C42B  1    0.597095    0.866368    0.215653    11.00000    0.03783    0.02927 =
         0.04228   -0.00890    0.00537   -0.00011
H42B  2    0.607148    0.901975    0.171075    11.00000   -1.20000
C43B  1    0.648501    0.915108    0.281884    11.00000    0.03971    0.04273 =
         0.06045   -0.02744    0.00234   -0.00562
H43B  2    0.692393    0.982544    0.281131    11.00000   -1.20000
C44B  1    0.629953    0.862674    0.346569    11.00000    0.03262    0.06712 =
         0.04386   -0.03245   -0.00800    0.01305
H44B  2    0.667425    0.895784    0.391955    11.00000   -1.20000
C45B  1    0.560209    0.761499    0.345467    11.00000    0.03550    0.05792 =
         0.02593   -0.00904   -0.00268    0.02329
H45B  2    0.546333    0.721488    0.389049    11.00000   -1.20000
C46B  1    0.507940    0.711477    0.279552    11.00000    0.02623    0.03255 =
         0.02415   -0.00407    0.00040    0.01109
H46B  2    0.462672    0.641611    0.279743    11.00000   -1.20000
HKLF 4

REM  as in P-1
REM R1 =  0.0338 for   11997 Fo > 4sig(Fo)  and  0.0543 for all   15841 data
REM    829 parameters refined using      0 restraints

END

WGHT      0.0339      0.5998

REM Highest difference peak  0.477,  deepest hole -0.584,  1-sigma level  0.054
Q1    1  -0.1411  0.6907  0.1242  11.00000  0.05    0.48
Q2    1   0.3005  0.0802  0.0938  11.00000  0.05    0.39
Q3    1   0.2601  0.5961  0.1056  11.00000  0.05    0.39
Q4    1   0.5176  0.3451  0.1112  11.00000  0.05    0.36
Q5    1   0.2230  0.5211  0.4187  11.00000  0.05    0.35
Q6    1   0.1019  0.9146  0.3898  11.00000  0.05    0.35
Q7    1   0.0030  0.6837  0.3969  11.00000  0.05    0.34
Q8    1   0.6590  0.3548  0.3767  11.00000  0.05    0.33
Q9    1   0.3602  0.4274  0.1102  11.00000  0.05    0.33
Q10   1   0.4044  0.1114  0.1591  11.00000  0.05    0.33
Q11   1  -0.0758  0.6932  0.1846  11.00000  0.05    0.31
Q12   1   0.2825  0.1582  0.1656  11.00000  0.05    0.31
Q13   1  -0.1379  0.7361  0.1674  11.00000  0.05    0.31
Q14   1   0.3450  0.4180  0.3665  11.00000  0.05    0.30
Q15   1   0.1665  0.5859  0.4046  11.00000  0.05    0.30
Q16   1   0.4817  0.3676  0.3503  11.00000  0.05    0.30
Q17   1  -0.0344  0.2332  0.2547  11.00000  0.05    0.30
Q18   1   0.0315  0.2981  0.2342  11.00000  0.05    0.30
Q19   1   0.5647  0.6438  0.0798  11.00000  0.05    0.29
Q20   1   0.5140  0.7058  0.1163  11.00000  0.05    0.29
;
_shelx_res_checksum   84365

_shelx_hkl_file
;
  -2   0   0   93.67    1.78
  -2   0   0   90.99    1.86
  -2   0   0   93.25    1.88
   2   0   0   93.11    1.85
  -3   0   0   30.41    0.66
  -3   0   0   31.23    0.63
  -3   0   0   30.25    0.66
   3   0   0   31.19    0.66
  -4   0   0  265.57    5.29
  -4   0   0  265.75    5.05
  -4   0   0  267.19    5.34
   4   0   0  263.20    5.25
  -5   0   0   21.38    0.51
  -5   0   0   20.95    0.48
  -5   0   0   21.71    0.52
   5   0   0   21.02    0.51
  -6   0   0    7.65    0.28
  -6   0   0    7.66    0.24
  -6   0   0    7.74    0.27
   6   0   0    7.52    0.27
  -7   0   0   25.74    0.65
  -7   0   0   25.69    0.64
  -7   0   0   25.32    0.60
   7   0   0   26.11    0.64
  -8   0   0   74.16    1.53
  -8   0   0   74.79    1.61
  -8   0   0   73.49    1.63
   8   0   0   74.21    1.59
  -9   0   0   21.13    0.55
  -9   0   0   21.20    0.60
  -9   0   0   21.36    0.61
   9   0   0   20.32    0.58
 -10   0   0    9.25    0.42
 -10   0   0    9.24    0.41
 -10   0   0    9.55    0.37
  10   0   0    9.62    0.39
 -11   0   0    0.27    0.18
 -11   0   0    0.16    0.19
 -11   0   0    0.47    0.22
  11   0   0    0.25    0.19
 -12   0   0   18.57    0.65
 -12   0   0   19.25    0.64
 -12   0   0   18.36    0.59
  12   0   0   18.69    0.61
 -13   0   0    6.44    0.44
 -13   0   0    6.43    0.43
 -13   0   0    5.52    0.36
 -14   0   0    0.35    0.26
 -14   0   0    0.05    0.27
 -15   0   0    0.45    0.27
 -15   0   0    0.88    0.35
 -16   0   0    0.80    0.32
  16   0   0    0.74    0.36
 -17   0   0    7.50    0.52
  17   0   0    7.51    0.58
  17  -1   0    4.79    0.52
 -17   1   0    3.92    0.49
 -17   1   0    4.98    0.44
 -16   1   0   -0.17    0.35
 -16   1   0    0.31    0.29
 -15   1   0    3.88    0.43
 -15   1   0    3.25    0.36
 -14   1   0    0.90    0.31
 -14   1   0    1.31    0.28
  13  -1   0    7.30    0.43
 -13   1   0    7.18    0.46
 -13   1   0    7.04    0.40
  12  -1   0    6.61    0.40
 -12   1   0    7.56    0.36
 -12   1   0    7.11    0.40
 -12   1   0    6.82    0.43
  11  -1   0    6.28    0.37
 -11   1   0    6.09    0.35
 -11   1   0    5.94    0.33
 -11   1   0    5.48    0.37
  10  -1   0    3.13    0.26
 -10   1   0    3.31    0.23
 -10   1   0    2.97    0.24
 -10   1   0    3.35    0.28
   9  -1   0    7.80    0.35
  -9   1   0    7.07    0.29
  -9   1   0    7.29    0.35
  -9   1   0    7.77    0.33
   8  -1   0   19.41    0.54
  -8   1   0   19.67    0.50
  -8   1   0   19.06    0.55
  -8   1   0   19.94    0.54
   7  -1   0    0.50    0.12
  -7   1   0    0.46    0.13
  -7   1   0    0.63    0.11
  -7   1   0    0.44    0.11
   6  -1   0   47.15    1.03
  -6   1   0   47.09    1.04
  -6   1   0   46.55    1.01
  -6   1   0   45.47    0.97
   5  -1   0    2.59    0.16
  -5   1   0    2.57    0.15
  -5   1   0    2.36    0.13
  -5   1   0    2.55    0.15
   4  -1   0   44.76    0.96
  -4   1   0   44.57    0.94
  -4   1   0   44.34    0.97
  -4   1   0   45.78    0.91
   3  -1   0   11.51    0.29
  -3   1   0   11.65    0.27
  -3   1   0   11.17    0.29
  -3   1   0   11.50    0.27
  -2   1   0   51.01    0.98
  -2   1   0   50.04    1.02
  -2   1   0   50.62    1.04
   1  -1   0    0.66    0.05
   1  -1   0    0.56    0.05
  -1   1   0    0.65    0.06
  -1   1   0    0.57    0.05
  -1  -1   0    0.06    0.02
  -1  -1   0    0.05    0.03
   1   1   0    0.03    0.02
   1   1   0    0.04    0.03
   1   1   0    0.06    0.02
  -2  -1   0   74.14    1.42
   2   1   0   73.58    1.42
   2   1   0   72.93    1.46
  -3  -1   0    1.83    0.10
  -3  -1   0    1.92    0.11
   3   1   0    1.87    0.09
   3   1   0    2.17    0.10
  -4  -1   0    1.65    0.12
  -4  -1   0    1.58    0.12
  -4  -1   0    1.65    0.10
   4   1   0    1.54    0.10
   4   1   0    1.56    0.10
  -5  -1   0   12.17    0.35
  -5  -1   0   11.15    0.33
  -5  -1   0   11.94    0.31
   5   1   0   11.53    0.32
   5   1   0   11.43    0.30
  -6  -1   0  142.35    2.80
  -6  -1   0  144.10    2.96
  -6  -1   0  142.93    2.94
   6   1   0  143.98    2.89
  -7  -1   0   19.64    0.55
  -7  -1   0   19.79    0.49
  -7  -1   0   19.34    0.54
   7   1   0   20.24    0.51
  -8  -1   0    0.11    0.15
  -8  -1   0   -0.04    0.13
  -8  -1   0   -0.14    0.12
   8   1   0    0.45    0.14
  -9  -1   0    0.95    0.18
  -9  -1   0    0.43    0.17
  -9  -1   0    0.70    0.16
   9   1   0    0.83    0.17
 -10  -1   0   25.30    0.67
 -10  -1   0   26.81    0.73
 -10  -1   0   25.12    0.72
  10   1   0   26.18    0.69
 -11  -1   0    7.01    0.35
 -11  -1   0    6.55    0.38
 -11  -1   0    7.08    0.42
  11   1   0    6.87    0.35
 -12  -1   0    4.73    0.38
 -12  -1   0    5.50    0.33
 -12  -1   0    5.67    0.38
 -13  -1   0   -0.09    0.27
 -13  -1   0   -0.11    0.23
 -13  -1   0   -0.14    0.24
  13   1   0    0.30    0.28
 -14  -1   0    1.78    0.31
 -14  -1   0    1.93    0.33
  14   1   0    2.11    0.35
 -15  -1   0   15.37    0.63
  15   1   0   16.51    0.72
 -16  -1   0    1.90    0.37
  16   1   0    2.02    0.41
 -17   2   0    3.11    0.39
 -17   2   0    3.56    0.48
 -16   2   0    3.84    0.40
 -16   2   0    3.79    0.44
 -15   2   0    1.61    0.36
 -15   2   0    2.31    0.33
  14  -2   0    4.93    0.40
 -14   2   0    4.16    0.34
 -14   2   0    4.54    0.41
  13  -2   0   15.68    0.61
 -13   2   0   16.11    0.61
 -13   2   0   14.45    0.52
  12  -2   0   16.19    0.59
 -12   2   0   15.52    0.56
 -12   2   0   15.31    0.54
 -12   2   0   15.88    0.53
  11  -2   0   15.67    0.54
 -11   2   0   15.18    0.49
 -11   2   0   14.66    0.54
 -11   2   0   13.76    0.48
  10  -2   0    0.38    0.18
 -10   2   0    0.43    0.15
 -10   2   0    0.36    0.16
 -10   2   0    0.21    0.17
   9  -2   0    5.74    0.31
  -9   2   0    5.69    0.33
  -9   2   0    6.20    0.29
  -9   2   0    5.86    0.28
   8  -2   0   92.06    1.96
  -8   2   0   91.74    1.86
  -8   2   0   90.80    1.92
  -8   2   0   92.75    1.98
   7  -2   0    5.17    0.28
  -7   2   0    5.42    0.27
  -7   2   0    6.02    0.24
  -7   2   0    5.67    0.23
  -6   2   0   53.03    1.13
  -6   2   0   52.63    1.17
  -6   2   0   53.93    1.10
   5  -2   0    1.23    0.13
  -5   2   0    1.06    0.08
  -5   2   0    0.89    0.09
  -5   2   0    1.19    0.11
   4  -2   0   46.57    0.99
  -4   2   0   45.76    0.93
  -4   2   0   46.53    0.95
  -4   2   0   46.54    1.00
   3  -2   0    6.61    0.18
   3  -2   0    7.05    0.21
  -3   2   0    7.05    0.21
  -3   2   0    6.93    0.17
  -3   2   0    6.86    0.18
   2  -2   0  490.51    9.58
   2  -2   0  501.71    9.87
  -2   2   0  526.68    9.63
  -2   2   0  503.17   10.15
  -2   2   0  494.95    9.94
   1  -2   0   -0.16    0.03
   1  -2   0   -0.18    0.02
   1  -2   0   -0.15    0.03
  -1   2   0   -0.15    0.03
  -1   2   0   -0.13    0.04
   0  -2   0  100.35    1.97
   0  -2   0  104.25    2.06
   0  -2   0  104.26    2.04
   0   2   0  104.19    2.09
   0   2   0  103.18    1.97
  -1  -2   0   29.16    0.58
   1   2   0   29.21    0.58
   1   2   0   28.47    0.62
   1   2   0   28.56    0.58
  -2  -2   0   16.14    0.39
  -2  -2   0   16.67    0.36
   2   2   0   16.59    0.38
   2   2   0   16.44    0.36
   2   2   0   16.60    0.35
  -3  -2   0    3.32    0.14
  -3  -2   0    3.37    0.17
   3   2   0    3.43    0.15
   3   2   0    3.54    0.12
   3   2   0    3.51    0.13
  -4  -2   0   29.38    0.62
  -4  -2   0   29.33    0.68
   4   2   0   28.96    0.62
   4   2   0   28.95    0.66
   4   2   0   28.77    0.62
  -5  -2   0   23.39    0.59
  -5  -2   0   23.36    0.53
   5   2   0   22.96    0.57
   5   2   0   23.44    0.53
   5   2   0   23.14    0.52
  -6  -2   0   39.41    0.85
  -6  -2   0   39.27    0.92
  -6  -2   0   39.02    0.91
   6   2   0   39.43    0.85
   6   2   0   39.30    0.90
   6   2   0   39.36    0.84
  -7  -2   0    2.07    0.19
  -7  -2   0    2.41    0.17
  -7  -2   0    2.47    0.20
   7   2   0    2.58    0.17
   7   2   0    2.20    0.19
  -8  -2   0    3.87    0.23
  -8  -2   0    3.97    0.27
  -8  -2   0    3.33    0.25
   8   2   0    4.07    0.26
   8   2   0    3.54    0.22
  -9  -2   0   14.66    0.51
  -9  -2   0   14.48    0.52
  -9  -2   0   14.33    0.46
   9   2   0   15.66    0.52
   9   2   0   14.19    0.44
 -10  -2   0    1.71    0.21
 -10  -2   0    1.79    0.24
  10   2   0    2.06    0.25
  10   2   0    2.21    0.21
 -11  -2   0    1.68    0.24
 -11  -2   0    2.10    0.28
  11   2   0    2.24    0.28
 -12  -2   0    1.80    0.30
 -12  -2   0    1.48    0.24
  12   2   0    1.58    0.27
 -13  -2   0   -0.08    0.24
 -13  -2   0    0.10    0.23
  13   2   0    0.02    0.27
 -14  -2   0    0.44    0.28
 -14  -2   0    0.22    0.30
  14   2   0    0.58    0.32
 -15  -2   0    3.54    0.38
 -15  -2   0    2.44    0.40
  15   2   0    2.65    0.40
 -16  -2   0    0.41    0.32
  16   2   0    0.30    0.36
 -17   3   0    3.11    0.46
 -17   3   0    3.16    0.39
 -16   3   0    0.65    0.29
 -16   3   0    0.33    0.34
  15  -3   0    4.18    0.42
 -15   3   0    3.11    0.40
 -15   3   0    4.25    0.38
  14  -3   0    2.24    0.35
 -14   3   0    1.77    0.34
 -14   3   0    2.08    0.29
  13  -3   0    6.03    0.42
 -13   3   0    6.17    0.38
 -13   3   0    4.95    0.39
  12  -3   0    1.67    0.29
 -12   3   0    1.91    0.23
 -12   3   0    2.44    0.28
  11  -3   0    3.85    0.32
 -11   3   0    3.08    0.23
 -11   3   0    3.89    0.27
 -11   3   0    3.34    0.29
  10  -3   0   19.42    0.62
 -10   3   0   19.55    0.54
 -10   3   0   20.45    0.55
 -10   3   0   18.89    0.60
   9  -3   0   13.69    0.49
  -9   3   0   12.49    0.41
  -9   3   0   12.78    0.39
  -9   3   0   13.73    0.47
   8  -3   0    0.38    0.15
  -8   3   0    0.27    0.10
  -8   3   0    0.31    0.14
  -8   3   0    0.28    0.12
   7  -3   0    6.50    0.31
  -7   3   0    6.23    0.25
  -7   3   0    6.62    0.28
  -7   3   0    6.58    0.23
   6  -3   0   74.86    1.59
  -6   3   0   73.82    1.60
  -6   3   0   74.35    1.53
  -6   3   0   75.16    1.50
  -5   3   0    3.92    0.19
  -5   3   0    3.50    0.13
  -5   3   0    3.72    0.16
   4  -3   0    9.01    0.28
   4  -3   0    9.48    0.24
  -4   3   0    9.16    0.25
  -4   3   0    9.42    0.22
  -4   3   0    9.47    0.28
   3  -3   0    1.14    0.08
   3  -3   0    0.86    0.09
  -3   3   0    0.86    0.09
  -3   3   0    0.83    0.05
  -3   3   0    1.01    0.08
   2  -3   0  110.46    2.18
   2  -3   0  108.15    2.15
   2  -3   0  107.68    2.09
  -2   3   0  107.51    2.22
   1  -3   0    1.03    0.06
   1  -3   0    1.13    0.07
   1  -3   0    0.89    0.06
  -1   3   0    1.09    0.07
   0  -3   0  226.36    4.35
   0  -3   0  231.15    4.55
   0  -3   0  235.00    4.50
   0   3   0  226.41    4.60
   0   3   0  225.11    4.35
  -1  -3   0   10.79    0.26
  -1  -3   0   10.53    0.28
   1   3   0   10.24    0.28
   1   3   0   10.67    0.24
   1   3   0   10.89    0.26
  -2  -3   0  489.24    9.40
  -2  -3   0  485.32    9.81
   2   3   0  499.98    9.75
   2   3   0  484.00    9.88
   2   3   0  516.69    9.46
  -3  -3   0   10.03    0.30
  -3  -3   0   10.30    0.27
   3   3   0   10.04    0.27
   3   3   0   10.19    0.24
   3   3   0   10.17    0.29
  -4  -3   0    1.55    0.11
  -4  -3   0    1.12    0.13
   4   3   0    1.50    0.09
   4   3   0    1.11    0.12
   4   3   0    1.50    0.11
  -5  -3   0   12.42    0.38
  -5  -3   0   11.54    0.33
   5   3   0   11.71    0.29
   5   3   0   11.65    0.36
   5   3   0   11.23    0.32
  -6  -3   0   17.20    0.50
  -6  -3   0   16.96    0.44
   6   3   0   16.93    0.49
   6   3   0   16.69    0.41
  -7  -3   0   11.45    0.35
  -7  -3   0   11.81    0.42
   7   3   0   10.79    0.32
   7   3   0   11.08    0.39
  -8  -3   0   16.17    0.54
  -8  -3   0   16.90    0.48
   8   3   0   17.65    0.45
   8   3   0   17.97    0.53
  -9  -3   0    0.13    0.18
  -9  -3   0    0.35    0.16
   9   3   0    0.30    0.14
   9   3   0    0.24    0.19
 -10  -3   0    0.52    0.18
 -10  -3   0    0.31    0.22
  10   3   0    0.63    0.21
 -11  -3   0   24.62    0.70
 -11  -3   0   25.26    0.80
  11   3   0   26.98    0.79
 -12  -3   0    5.48    0.42
 -12  -3   0    4.93    0.34
  12   3   0    5.63    0.40
 -13  -3   0   -0.23    0.24
 -13  -3   0    0.07    0.28
  13   3   0    0.26    0.28
 -14  -3   0    0.56    0.31
 -14  -3   0    0.34    0.27
  14   3   0    0.51    0.31
 -15  -3   0    2.30    0.35
 -15  -3   0    2.07    0.40
  15   3   0    2.22    0.40
 -16  -3   0    1.19    0.34
  16   3   0    0.06    0.37
 -17   4   0    0.22    0.38
 -17   4   0   -0.02    0.32
  16  -4   0    3.17    0.43
 -16   4   0    3.64    0.44
 -16   4   0    3.66    0.39
  15  -4   0    8.08    0.55
 -15   4   0    7.46    0.50
 -15   4   0    7.46    0.44
  14  -4   0    0.61    0.31
 -14   4   0    0.92    0.26
 -14   4   0    0.92    0.31
  13  -4   0    2.33    0.34
 -13   4   0    1.88    0.30
 -13   4   0    1.98    0.26
  12  -4   0   23.91    0.76
 -12   4   0   22.17    0.71
 -12   4   0   23.32    0.67
  11  -4   0    6.65    0.42
 -11   4   0    7.20    0.41
 -11   4   0    6.68    0.35
  10  -4   0    7.53    0.42
 -10   4   0    9.19    0.35
 -10   4   0    8.21    0.41
   9  -4   0    0.04    0.18
  -9   4   0    0.13    0.10
  -9   4   0   -0.07    0.15
  -9   4   0    0.04    0.14
   8  -4   0   21.38    0.60
  -8   4   0   21.50    0.50
  -8   4   0   20.92    0.60
  -8   4   0   20.21    0.53
   7  -4   0    0.17    0.14
  -7   4   0    0.17    0.07
  -7   4   0    0.08    0.13
  -7   4   0    0.12    0.10
   6  -4   0   33.96    0.80
  -6   4   0   33.92    0.74
  -6   4   0   33.15    0.70
  -6   4   0   32.28    0.79
   5  -4   0    0.04    0.07
   5  -4   0   -0.09    0.09
  -5   4   0   -0.05    0.07
  -5   4   0   -0.02    0.09
  -5   4   0    0.01    0.04
   4  -4   0   33.86    0.77
   4  -4   0   33.01    0.71
  -4   4   0   33.30    0.78
  -4   4   0   33.66    0.69
  -4   4   0   35.57    0.72
   3  -4   0    3.64    0.16
   3  -4   0    3.69    0.14
   3  -4   0    3.51    0.10
  -3   4   0    3.26    0.17
  -3   4   0    3.56    0.15
   2  -4   0  181.49    3.54
   2  -4   0  178.69    3.42
   2  -4   0  178.30    3.55
  -2   4   0  178.36    3.42
  -2   4   0  175.41    3.62
   1  -4   0    9.99    0.26
   1  -4   0   10.17    0.25
   1  -4   0   10.33    0.26
  -1   4   0   10.42    0.29
  -1   4   0    9.95    0.26
   0  -4   0   21.42    0.45
   0  -4   0   21.25    0.48
   0  -4   0   20.21    0.45
   0   4   0   20.32    0.50
   0   4   0   20.52    0.46
  -1  -4   0   53.37    1.08
  -1  -4   0   53.25    1.14
   1   4   0   54.66    1.09
   1   4   0   54.21    1.08
   1   4   0   53.32    1.15
  -2  -4   0   25.91    0.63
  -2  -4   0   27.94    0.59
   2   4   0   27.24    0.56
   2   4   0   25.99    0.62
   2   4   0   27.60    0.59
  -3  -4   0    0.97    0.12
  -3  -4   0    1.09    0.11
   3   4   0    1.11    0.07
   3   4   0    0.91    0.11
   3   4   0    1.12    0.11
  -4  -4   0   13.03    0.35
  -4  -4   0   12.15    0.39
   4   4   0   13.44    0.39
   4   4   0   12.50    0.30
   4   4   0   13.32    0.35
  -5  -4   0   54.48    1.25
  -5  -4   0   55.82    1.17
   5   4   0   56.58    1.14
   5   4   0   55.31    1.24
   5   4   0   57.52    1.16
  -6  -4   0   10.54    0.39
  -6  -4   0   11.10    0.34
   6   4   0   10.70    0.34
   6   4   0   10.83    0.28
   6   4   0   10.58    0.37
  -7  -4   0    1.09    0.16
  -7  -4   0    1.44    0.21
   7   4   0    0.96    0.11
   7   4   0    1.06    0.17
  -8  -4   0   16.50    0.49
  -8  -4   0   17.69    0.57
   8   4   0   17.66    0.54
  -9  -4   0    7.57    0.34
  -9  -4   0    8.60    0.43
   9   4   0    8.72    0.40
 -10  -4   0   -0.11    0.22
 -10  -4   0   -0.21    0.17
  10   4   0    0.37    0.21
 -11  -4   0   -0.32    0.20
 -11  -4   0    0.33    0.24
  11   4   0    0.08    0.24
 -12  -4   0    1.76    0.28
 -12  -4   0    1.81    0.34
  12   4   0    2.06    0.30
 -13  -4   0    5.73    0.41
 -13  -4   0    6.37    0.49
  13   4   0    6.09    0.45
 -14  -4   0    0.64    0.35
 -14  -4   0    1.52    0.33
  14   4   0    0.80    0.32
 -15  -4   0    2.47    0.36
 -15  -4   0    1.50    0.37
  15   4   0    2.09    0.41
  17  -5   0   -0.32    0.34
 -17   5   0    0.04    0.37
 -17   5   0   -0.15    0.32
 -16   5   0    0.47    0.35
 -16   5   0    0.68    0.29
  15  -5   0    0.66    0.33
 -15   5   0   -0.08    0.29
 -15   5   0    0.49    0.28
  14  -5   0    7.09    0.50
 -14   5   0    7.89    0.45
 -14   5   0    7.13    0.48
  13  -5   0    2.35    0.34
 -13   5   0    1.55    0.25
 -13   5   0    1.76    0.29
  12  -5   0    5.67    0.42
 -12   5   0    5.02    0.32
 -12   5   0    6.41    0.43
  11  -5   0    0.96    0.26
 -11   5   0    0.55    0.18
 -11   5   0    1.22    0.25
  10  -5   0   22.06    0.70
 -10   5   0   22.19    0.60
 -10   5   0   22.45    0.67
   9  -5   0    0.90    0.21
  -9   5   0    0.88    0.16
  -9   5   0    0.83    0.20
   8  -5   0    1.84    0.21
  -8   5   0    1.86    0.21
  -8   5   0    1.95    0.18
  -8   5   0    2.01    0.14
   7  -5   0    0.43    0.15
  -7   5   0    0.92    0.14
  -7   5   0    0.63    0.14
  -7   5   0    0.68    0.07
   6  -5   0   95.28    1.99
   6  -5   0   94.32    1.87
  -6   5   0   94.55    1.89
  -6   5   0   94.32    1.88
  -6   5   0   92.86    2.01
   5  -5   0    0.09    0.11
   5  -5   0    0.23    0.09
  -5   5   0    0.11    0.09
  -5   5   0    0.23    0.04
  -5   5   0    0.22    0.11
   4  -5   0    9.99    0.28
   4  -5   0   10.45    0.32
  -4   5   0    9.79    0.28
  -4   5   0    9.93    0.22
  -4   5   0   10.15    0.34
   3  -5   0    0.02    0.05
   3  -5   0    0.13    0.09
   3  -5   0    0.10    0.07
  -3   5   0    0.13    0.07
  -3   5   0    0.11    0.09
   2  -5   0   10.49    0.27
   2  -5   0   10.39    0.25
   2  -5   0    9.54    0.28
  -2   5   0    9.75    0.31
   1  -5   0    5.42    0.18
   1  -5   0    5.48    0.18
   1  -5   0    5.75    0.19
  -1   5   0    5.60    0.19
  -1   5   0    5.18    0.22
   0  -5   0  108.05    2.14
   0  -5   0  111.09    2.19
   0  -5   0  111.36    2.23
   0   5   0  108.60    2.14
   0   5   0  108.34    2.28
  -1  -5   0    4.64    0.18
  -1  -5   0    4.91    0.16
   1   5   0    4.95    0.19
  -2  -5   0   96.07    2.04
  -2  -5   0   99.26    1.94
   2   5   0   98.18    2.06
   2   5   0   99.97    1.96
   2   5   0   97.94    1.94
  -3  -5   0   54.48    1.20
  -3  -5   0   53.21    1.12
   3   5   0   55.23    1.10
   3   5   0   53.49    1.20
   3   5   0   54.86    1.13
  -4  -5   0   14.03    0.38
   4   5   0   14.64    0.33
   4   5   0   13.65    0.42
   4   5   0   14.08    0.38
  -5  -5   0    0.13    0.13
  -5  -5   0    0.06    0.11
   5   5   0    0.00    0.10
   5   5   0    0.18    0.13
   5   5   0    0.17    0.07
  -6  -5   0   11.67    0.45
  -6  -5   0   11.26    0.37
   6   5   0   11.41    0.41
   6   5   0   11.88    0.30
  -7  -5   0   17.22    0.58
  -7  -5   0   17.17    0.50
   7   5   0   17.37    0.53
  -8  -5   0    6.45    0.33
  -8  -5   0    6.29    0.38
   8   5   0    6.76    0.39
  -9  -5   0    2.15    0.27
  -9  -5   0    1.46    0.22
   9   5   0    1.92    0.26
 -10  -5   0    3.68    0.29
 -10  -5   0    3.72    0.35
  10   5   0    3.90    0.33
 -11  -5   0    6.59    0.38
 -11  -5   0    7.63    0.49
  11   5   0    6.08    0.42
 -12  -5   0    0.72    0.25
 -12  -5   0    0.76    0.30
  12   5   0    0.39    0.29
 -13  -5   0    0.44    0.27
 -13  -5   0   -0.09    0.29
  13   5   0   -0.25    0.27
 -14  -5   0    1.92    0.36
 -14  -5   0    0.85    0.38
  14   5   0    1.10    0.36
 -15  -5   0    0.13    0.36
  15   5   0   -0.51    0.35
  17  -6   0    1.21    0.43
 -17   6   0    0.34    0.39
 -17   6   0    0.66    0.34
  16  -6   0    5.93    0.54
 -16   6   0    5.88    0.45
 -16   6   0    6.39    0.52
  15  -6   0    6.97    0.53
 -15   6   0    5.54    0.47
 -15   6   0    5.77    0.42
  14  -6   0    8.03    0.52
 -14   6   0    8.97    0.53
 -14   6   0    8.09    0.46
  13  -6   0    0.17    0.27
 -13   6   0   -0.09    0.24
 -13   6   0   -0.21    0.22
  12  -6   0   18.80    0.70
 -12   6   0   19.10    0.66
 -12   6   0   18.41    0.58
  11  -6   0    0.57    0.26
 -11   6   0    0.45    0.24
 -11   6   0    0.92    0.20
  10  -6   0   26.16    0.77
 -10   6   0   25.18    0.75
 -10   6   0   24.60    0.67
   9  -6   0   -0.07    0.18
  -9   6   0    0.06    0.16
  -9   6   0   -0.01    0.15
  -8   6   0   38.09    0.87
  -8   6   0   36.67    0.93
   7  -6   0    4.12    0.28
  -7   6   0    4.02    0.24
  -7   6   0    4.89    0.27
   6  -6   0    7.21    0.31
   6  -6   0    6.05    0.24
  -6   6   0    6.35    0.25
  -6   6   0    6.16    0.29
   5  -6   0    1.72    0.14
   5  -6   0    1.76    0.17
  -5   6   0    1.72    0.17
  -5   6   0    1.50    0.14
   4  -6   0  124.05    2.49
   4  -6   0  127.79    2.57
   4  -6   0  122.92    2.45
  -4   6   0  123.23    2.62
  -4   6   0  128.14    2.46
   3  -6   0   22.75    0.49
   3  -6   0   21.42    0.55
   3  -6   0   23.12    0.52
  -3   6   0   21.88    0.58
   2  -6   0    2.36    0.15
   2  -6   0    2.61    0.16
   2  -6   0    2.35    0.13
  -2   6   0    2.50    0.18
  -2   6   0    2.50    0.16
   1  -6   0    0.82    0.10
   1  -6   0    0.90    0.10
   1  -6   0    0.81    0.10
  -1   6   0    0.65    0.12
  -1   6   0    0.69    0.10
   0  -6   0  119.81    2.36
   0  -6   0  114.99    2.31
   0  -6   0  119.37    2.41
   0   6   0  116.87    2.46
   0   6   0  117.11    2.31
  -1  -6   0    6.69    0.26
  -1  -6   0    7.24    0.21
  -1  -6   0    7.16    0.24
   1   6   0    7.38    0.26
   1   6   0    6.30    0.29
  -2  -6   0   72.96    1.53
  -2  -6   0   75.97    1.62
   2   6   0   76.59    1.64
   2   6   0   77.20    1.53
  -3  -6   0   18.05    0.46
  -3  -6   0   17.80    0.52
   3   6   0   17.94    0.46
   3   6   0   18.04    0.51
   3   6   0   18.24    0.41
  -4  -6   0   43.13    0.94
  -4  -6   0   41.36    1.01
   4   6   0   42.61    1.01
   4   6   0   42.81    0.93
   4   6   0   43.99    0.89
  -5  -6   0    6.06    0.33
  -5  -6   0    6.03    0.27
   5   6   0    6.83    0.20
   5   6   0    6.87    0.29
   5   6   0    6.82    0.32
  -6  -6   0    0.90    0.17
  -6  -6   0    0.79    0.19
   6   6   0    1.05    0.19
  -7  -6   0    8.40    0.35
  -7  -6   0    7.25    0.40
   7   6   0    7.61    0.40
  -8  -6   0    2.79    0.25
  -8  -6   0    2.85    0.29
   8   6   0    2.92    0.29
  -9  -6   0   15.96    0.61
  -9  -6   0   15.64    0.52
   9   6   0   16.32    0.60
 -10  -6   0    0.18    0.21
 -10  -6   0    0.43    0.28
  10   6   0   -0.16    0.24
 -11  -6   0    1.17    0.27
 -11  -6   0    1.45    0.33
  11   6   0    1.15    0.31
 -12  -6   0    1.53    0.35
 -12  -6   0    1.42    0.31
  12   6   0    1.29    0.31
 -13  -6   0   -0.48    0.32
 -13  -6   0    0.13    0.29
  13   6   0    0.10    0.31
 -14  -6   0    0.58    0.37
  14   6   0    0.18    0.35
  17  -7   0    3.64    0.52
 -17   7   0    2.81    0.39
 -17   7   0    2.92    0.46
  16  -7   0    3.36    0.45
 -16   7   0    2.32    0.42
 -16   7   0    3.63    0.40
  15  -7   0    0.20    0.32
 -15   7   0    0.01    0.32
 -15   7   0   -0.14    0.26
  14  -7   0   12.60    0.65
 -14   7   0   11.25    0.56
 -14   7   0   11.70    0.51
  13  -7   0   11.19    0.56
 -13   7   0   10.64    0.46
 -13   7   0   10.13    0.55
  12  -7   0    9.89    0.52
 -12   7   0   10.07    0.43
 -12   7   0    9.23    0.48
  11  -7   0    1.78    0.30
 -11   7   0    1.85    0.23
 -11   7   0    1.38    0.27
  10  -7   0   14.22    0.56
 -10   7   0   13.23    0.51
 -10   7   0   13.73    0.47
   9  -7   0    6.83    0.39
  -9   7   0    7.39    0.38
  -9   7   0    7.37    0.32
   8  -7   0   47.76    1.17
  -8   7   0   48.17    1.16
  -8   7   0   48.70    1.08
   7  -7   0    4.33    0.29
  -7   7   0    3.95    0.27
  -7   7   0    4.16    0.24
   6  -7   0   31.50    0.78
   6  -7   0   30.47    0.69
  -6   7   0   29.20    0.77
  -6   7   0   28.85    0.70
   5  -7   0    1.00    0.16
   5  -7   0    1.04    0.13
  -5   7   0    1.07    0.14
  -5   7   0    1.15    0.16
  -5   7   0    1.33    0.07
   4  -7   0   86.33    1.74
   4  -7   0   88.92    1.74
   4  -7   0   87.17    1.82
  -4   7   0   84.28    1.75
  -4   7   0   85.61    1.87
   3  -7   0   -0.17    0.09
   3  -7   0    0.01    0.07
   3  -7   0   -0.03    0.10
  -3   7   0    0.07    0.09
  -3   7   0    0.10    0.13
   2  -7   0    8.62    0.28
   2  -7   0    9.19    0.27
   2  -7   0    8.95    0.30
  -2   7   0    9.15    0.29
  -2   7   0    8.52    0.35
   1  -7   0   13.45    0.37
   1  -7   0   13.92    0.37
   1  -7   0   14.06    0.37
  -1   7   0   13.86    0.45
  -1   7   0   13.12    0.38
   0  -7   0   63.36    1.39
   0  -7   0   65.49    1.35
   0  -7   0   66.74    1.36
   0   7   0   66.19    1.35
   0   7   0   65.50    1.45
  -1  -7   0   15.71    0.39
  -1  -7   0   15.91    0.42
  -1  -7   0   15.21    0.45
   1   7   0   15.76    0.42
   1   7   0   15.79    0.49
  -2  -7   0    0.08    0.11
  -2  -7   0   -0.08    0.12
  -2  -7   0    0.12    0.08
   2   7   0    0.09    0.11
   2   7   0    0.04    0.13
  -3  -7   0   74.76    1.60
  -3  -7   0   79.86    1.71
   3   7   0   77.86    1.60
   3   7   0   78.37    1.72
   3   7   0   79.05    1.58
  -4  -7   0    5.87    0.34
  -4  -7   0    5.36    0.26
   4   7   0    5.65    0.19
   4   7   0    5.57    0.28
   4   7   0    5.60    0.31
  -5  -7   0    0.30    0.17
  -5  -7   0   -0.06    0.14
   5   7   0    0.64    0.17
  -6  -7   0    2.35    0.22
  -6  -7   0    2.28    0.25
   6   7   0    2.20    0.25
  -7  -7   0    3.80    0.32
  -7  -7   0    3.88    0.27
   7   7   0    4.15    0.32
  -8  -7   0    0.25    0.19
  -8  -7   0   -0.01    0.22
   8   7   0    0.12    0.23
  -9  -7   0    6.11    0.42
  -9  -7   0    4.94    0.33
   9   7   0    5.66    0.40
 -10  -7   0   -0.02    0.26
 -10  -7   0    0.32    0.23
  10   7   0    0.14    0.24
 -11  -7   0    2.66    0.32
  11   7   0    2.14    0.35
 -12  -7   0    0.95    0.29
 -12  -7   0    1.26    0.36
  12   7   0    0.88    0.33
 -13  -7   0   -0.44    0.32
  13   7   0    0.36    0.34
 -14  -7   0   -0.35    0.38
  14   7   0    0.10    0.36
  17  -8   0   -0.08    0.41
 -17   8   0    0.13    0.32
 -17   8   0   -0.13    0.37
  16  -8   0    1.55    0.43
 -16   8   0    1.47    0.40
 -16   8   0    1.73    0.35
  15  -8   0    0.65    0.35
 -15   8   0    0.27    0.30
 -15   8   0    1.21    0.36
  14  -8   0   16.14    0.74
 -14   8   0   16.70    0.62
 -14   8   0   15.07    0.68
  13  -8   0    0.25    0.29
 -13   8   0    0.62    0.25
 -13   8   0   -0.10    0.28
  12  -8   0    6.92    0.47
 -12   8   0    6.66    0.43
 -12   8   0    5.81    0.39
  11  -8   0   -0.07    0.24
 -11   8   0   -0.17    0.18
 -11   8   0   -0.19    0.21
  10  -8   0   25.67    0.81
 -10   8   0   27.02    0.80
 -10   8   0   29.09    0.74
   9  -8   0    1.09    0.23
  -9   8   0    1.09    0.22
  -9   8   0    1.28    0.21
   8  -8   0   51.32    1.23
  -8   8   0   50.28    1.22
  -8   8   0   50.63    1.13
   7  -8   0    0.82    0.19
  -7   8   0    0.52    0.19
  -7   8   0    0.33    0.15
   6  -8   0   66.55    1.46
  -6   8   0   62.83    1.37
  -6   8   0   65.17    1.49
   5  -8   0    1.06    0.17
   5  -8   0    1.52    0.16
   5  -8   0    1.30    0.09
  -5   8   0    1.33    0.20
  -5   8   0    1.15    0.16
   4  -8   0   36.29    0.85
   4  -8   0   35.72    0.77
   4  -8   0   35.50    0.81
  -4   8   0   35.42    0.89
  -4   8   0   35.94    0.81
   3  -8   0   13.96    0.41
   3  -8   0   13.63    0.39
   3  -8   0   13.80    0.36
  -3   8   0   13.54    0.46
  -3   8   0   13.84    0.40
   2  -8   0   31.77    0.70
   2  -8   0   30.27    0.69
   2  -8   0   29.72    0.71
  -2   8   0   29.84    0.78
  -2   8   0   30.55    0.71
   1  -8   0    0.00    0.10
   1  -8   0    0.10    0.11
   1  -8   0    0.05    0.10
  -1   8   0    0.03    0.10
  -1   8   0    0.02    0.13
   0  -8   0    0.33    0.12
   0  -8   0   -0.01    0.11
   0  -8   0    0.14    0.10
   0   8   0    0.14    0.14
   0   8   0    0.15    0.11
  -1  -8   0    0.18    0.11
  -1  -8   0    0.25    0.09
  -1  -8   0    0.09    0.13
   1   8   0    0.06    0.15
   1   8   0    0.30    0.12
  -2  -8   0   42.68    0.92
  -2  -8   0   42.95    0.96
  -2  -8   0   42.63    1.02
   2   8   0   42.99    1.05
   2   8   0   44.48    0.97
  -3  -8   0   10.63    0.36
  -3  -8   0   11.21    0.30
  -3  -8   0   10.59    0.41
   3   8   0   10.50    0.38
   3   8   0   10.42    0.45
  -4  -8   0   15.69    0.48
  -4  -8   0   16.52    0.54
   4   8   0   16.23    0.56
  -5  -8   0    1.91    0.24
  -5  -8   0    2.27    0.22
   5   8   0    2.69    0.26
  -6  -8   0   20.87    0.60
  -6  -8   0   22.28    0.69
   6   8   0   21.44    0.67
  -7  -8   0    1.75    0.23
  -7  -8   0    1.11    0.25
   7   8   0    1.55    0.27
  -8  -8   0    1.48    0.25
  -8  -8   0    1.42    0.28
   8   8   0    1.57    0.29
  -9  -8   0    3.91    0.32
  -9  -8   0    3.34    0.37
   9   8   0    4.71    0.39
 -10  -8   0    1.12    0.27
 -10  -8   0    0.82    0.30
  10   8   0    0.84    0.29
 -11  -8   0   -0.21    0.25
 -11  -8   0    0.27    0.31
  11   8   0   -0.07    0.31
 -12  -8   0    0.73    0.35
  12   8   0    0.94    0.36
 -13  -8   0    1.95    0.42
  13   8   0    2.10    0.41
  16  -9   0    4.61    0.53
 -16   9   0    4.14    0.43
 -16   9   0    4.90    0.50
  15  -9   0    1.12    0.38
 -15   9   0    0.64    0.31
 -15   9   0    0.76    0.36
  14  -9   0   -0.15    0.33
 -14   9   0    0.12    0.32
 -14   9   0    0.05    0.27
  13  -9   0    4.56    0.44
 -13   9   0    4.65    0.36
 -13   9   0    4.13    0.41
  12  -9   0   12.85    0.61
 -12   9   0   12.62    0.56
 -12   9   0   12.84    0.52
  11  -9   0    0.09    0.25
 -11   9   0    0.36    0.24
 -11   9   0    0.13    0.21
  10  -9   0    3.55    0.36
 -10   9   0    3.29    0.28
 -10   9   0    3.80    0.34
   9  -9   0    0.65    0.23
  -9   9   0    0.93    0.24
  -9   9   0    0.58    0.18
   8  -9   0   39.79    1.04
  -8   9   0   41.08    0.96
  -8   9   0   40.03    1.03
   7  -9   0    0.34    0.19
  -7   9   0    0.42    0.19
  -7   9   0    0.33    0.16
   6  -9   0   11.14    0.43
  -6   9   0   12.79    0.48
  -6   9   0   10.09    0.39
   5  -9   0    9.71    0.40
  -5   9   0   10.63    0.45
  -5   9   0    9.57    0.35
   4  -9   0   33.63    0.78
   4  -9   0   32.51    0.83
   4  -9   0   34.53    0.74
  -4   9   0   34.41    0.88
  -4   9   0   32.17    0.78
   3  -9   0    4.46    0.24
   3  -9   0    4.00    0.22
   3  -9   0    3.86    0.23
  -3   9   0    3.97    0.24
  -3   9   0    4.50    0.30
   2  -9   0    0.39    0.12
   2  -9   0    0.47    0.13
   2  -9   0    0.49    0.13
  -2   9   0    0.34    0.13
  -2   9   0    0.47    0.17
   1  -9   0   30.68    0.72
   1  -9   0   29.76    0.72
   1  -9   0   30.04    0.71
  -1   9   0   29.30    0.80
  -1   9   0   30.24    0.73
   0  -9   0    2.51    0.20
   0  -9   0    3.06    0.21
   0  -9   0    2.95    0.18
   0   9   0    3.02    0.25
   0   9   0    2.90    0.20
  -1  -9   0   23.20    0.62
  -1  -9   0   23.20    0.59
  -1  -9   0   23.23    0.56
   1   9   0   23.30    0.70
   1   9   0   22.74    0.60
  -2  -9   0    7.92    0.27
  -2  -9   0    8.40    0.34
  -2  -9   0    8.27    0.38
   2   9   0    7.31    0.32
   2   9   0    7.71    0.39
  -3  -9   0    4.69    0.29
  -3  -9   0    4.64    0.32
   3   9   0    5.56    0.35
  -4  -9   0    0.47    0.19
  -4  -9   0   -0.06    0.16
   4   9   0   -0.03    0.18
  -5  -9   0    1.78    0.22
  -5  -9   0    2.21    0.27
   5   9   0    2.01    0.27
  -6  -9   0    6.41    0.35
  -6  -9   0    6.57    0.44
   6   9   0    6.09    0.41
  -7  -9   0    6.75    0.39
  -7  -9   0    6.64    0.45
   7   9   0    5.92    0.40
  -8  -9   0    1.84    0.32
  -8  -9   0    1.44    0.26
   8   9   0    1.53    0.29
  -9  -9   0    9.40    0.56
  -9  -9   0    8.83    0.45
   9   9   0    8.46    0.51
 -10  -9   0    0.12    0.30
 -10  -9   0    0.05    0.26
  10   9   0    0.02    0.31
 -11  -9   0    2.25    0.39
  11   9   0    0.83    0.36
 -12  -9   0   -0.04    0.35
  12   9   0   -0.19    0.35
 -13  -9   0    0.91    0.41
  13   9   0    2.22    0.44
  16 -10   0    2.22    0.48
 -16  10   0    1.85    0.38
 -16  10   0    1.77    0.42
  15 -10   0    0.27    0.36
 -15  10   0    0.03    0.31
 -15  10   0    0.81    0.34
  14 -10   0    2.87    0.43
 -14  10   0    2.79    0.36
 -14  10   0    2.75    0.38
  13 -10   0    0.46    0.32
 -13  10   0    0.39    0.26
 -13  10   0    0.38    0.29
  12 -10   0    2.17    0.35
 -12  10   0    2.54    0.35
 -12  10   0    2.18    0.30
  11 -10   0    0.85    0.29
 -11  10   0    0.38    0.28
 -11  10   0    0.65    0.24
  10 -10   0   47.60    1.24
 -10  10   0   46.27    1.13
 -10  10   0   46.90    1.21
   9 -10   0    1.10    0.26
  -9  10   0    1.22    0.22
  -9  10   0    1.25    0.27
   8 -10   0    3.82    0.33
  -8  10   0    4.23    0.34
  -8  10   0    3.90    0.29
   7 -10   0    0.48    0.20
  -7  10   0    0.59    0.18
  -7  10   0    0.35    0.21
   6 -10   0   14.63    0.52
  -6  10   0   13.42    0.45
  -6  10   0   13.50    0.52
   5 -10   0    3.86    0.28
  -5  10   0    4.06    0.31
  -5  10   0    4.55    0.27
   4 -10   0    0.01    0.16
   4 -10   0    0.13    0.11
  -4  10   0    0.00    0.16
  -4  10   0    0.07    0.19
   3 -10   0    1.99    0.20
   3 -10   0    2.16    0.17
  -3  10   0    1.88    0.24
  -3  10   0    1.80    0.19
   2 -10   0   38.01    0.88
   2 -10   0   37.28    0.90
   2 -10   0   38.59    0.89
  -2  10   0   38.78    1.00
  -2  10   0   38.13    0.89
   1 -10   0    0.09    0.13
   1 -10   0   -0.07    0.14
   1 -10   0    0.08    0.15
  -1  10   0   -0.10    0.17
  -1  10   0    0.17    0.15
   0 -10   0    0.23    0.15
   0 -10   0    0.37    0.15
   0 -10   0    0.27    0.13
   0  10   0    0.43    0.15
   0  10   0    0.21    0.20
  -1 -10   0    4.44    0.23
  -1 -10   0    3.37    0.24
  -1 -10   0    3.38    0.26
   1  10   0    3.49    0.25
   1  10   0    3.77    0.31
  -2 -10   0   25.00    0.70
  -2 -10   0   24.94    0.66
   2  10   0   25.11    0.77
  -3 -10   0    0.64    0.19
  -3 -10   0    1.13    0.22
   3  10   0    0.64    0.22
  -4 -10   0   -0.12    0.21
  -4 -10   0   -0.14    0.16
   4  10   0   -0.08    0.22
  -5 -10   0    5.14    0.37
  -5 -10   0    4.64    0.31
   5  10   0    5.26    0.39
  -6 -10   0    0.03    0.22
  -6 -10   0    0.01    0.23
   6  10   0   -0.04    0.24
  -7 -10   0    3.48    0.32
  -7 -10   0    2.98    0.35
   7  10   0    4.06    0.37
  -8 -10   0    0.48    0.29
   8  10   0    0.17    0.27
  -9 -10   0    0.60    0.34
   9  10   0    0.78    0.31
 -10 -10   0    0.31    0.35
  10  10   0   -0.25    0.33
 -11 -10   0    0.48    0.36
  11  10   0    0.37    0.37
 -12 -10   0    0.90    0.41
  12  10   0    0.58    0.39
  16 -11   0    3.78    0.51
 -16  11   0    3.70    0.42
 -16  11   0    4.21    0.48
  15 -11   0    2.29    0.45
 -15  11   0    2.25    0.36
 -15  11   0    2.06    0.42
  14 -11   0    0.71    0.37
 -14  11   0   -0.11    0.33
 -14  11   0    0.47    0.29
  13 -11   0   -0.05    0.33
 -13  11   0    0.48    0.28
 -13  11   0    0.09    0.29
  12 -11   0   18.31    0.73
 -12  11   0   17.81    0.72
 -12  11   0   16.58    0.61
  11 -11   0    0.10    0.30
 -11  11   0    0.13    0.24
 -11  11   0   -0.09    0.25
  10 -11   0    1.36    0.30
 -10  11   0    1.48    0.26
 -10  11   0    0.98    0.28
   9 -11   0    8.99    0.48
  -9  11   0    9.65    0.42
  -9  11   0    9.94    0.52
   8 -11   0   35.46    0.99
  -8  11   0   35.49    0.98
  -8  11   0   35.16    0.89
   7 -11   0    4.47    0.34
  -7  11   0    3.93    0.29
  -7  11   0    4.50    0.35
   6 -11   0    3.45    0.29
  -6  11   0    3.62    0.33
  -6  11   0    3.40    0.27
   5 -11   0   18.61    0.60
  -5  11   0   18.34    0.55
  -5  11   0   18.26    0.64
   4 -11   0    4.71    0.32
  -4  11   0    3.89    0.27
  -4  11   0    4.79    0.35
   3 -11   0   28.22    0.68
   3 -11   0   26.49    0.72
  -3  11   0   26.34    0.72
  -3  11   0   27.65    0.81
   2 -11   0    0.10    0.15
   2 -11   0    0.27    0.16
  -2  11   0    0.15    0.16
  -2  11   0    0.11    0.21
   1 -11   0   14.97    0.48
   1 -11   0   15.55    0.47
  -1  11   0   14.52    0.50
  -1  11   0   15.52    0.60
   0 -11   0    0.27    0.14
   0 -11   0    0.20    0.17
   0  11   0    0.14    0.21
  -1 -11   0   15.72    0.50
  -1 -11   0   15.00    0.53
   1  11   0   16.50    0.63
  -2 -11   0    4.61    0.32
  -2 -11   0    5.20    0.31
   2  11   0    5.22    0.38
  -3 -11   0    0.68    0.24
  -3 -11   0    0.14    0.19
   3  11   0    0.55    0.24
  -4 -11   0    1.93    0.25
  -4 -11   0    2.36    0.29
   4  11   0    2.29    0.31
  -5 -11   0   12.28    0.58
   5  11   0   13.78    0.62
  -6 -11   0    0.36    0.29
   6  11   0    0.68    0.28
  -7 -11   0    0.18    0.28
   7  11   0    0.35    0.31
  -8 -11   0    1.07    0.33
   8  11   0    0.73    0.34
  -9 -11   0    1.17    0.38
   9  11   0    1.02    0.38
 -10 -11   0   -0.34    0.35
  10  11   0   -0.34    0.32
 -11 -11   0    0.69    0.41
  11  11   0    1.54    0.42
  15 -12   0    0.01    0.37
 -15  12   0    0.50    0.36
  14 -12   0    9.56    0.66
 -14  12   0    9.63    0.59
 -14  12   0    9.46    0.55
  13 -12   0    0.62    0.38
 -13  12   0    0.12    0.31
 -13  12   0    0.57    0.29
  12 -12   0    1.92    0.38
 -12  12   0    1.97    0.31
 -12  12   0    1.94    0.37
  11 -12   0    1.30    0.36
 -11  12   0    0.49    0.26
 -11  12   0    0.90    0.30
  10 -12   0   11.05    0.57
 -10  12   0   12.58    0.60
 -10  12   0   11.91    0.50
   9 -12   0    0.02    0.26
  -9  12   0   -0.41    0.22
  -9  12   0    0.06    0.27
   8 -12   0    3.92    0.37
  -8  12   0    4.32    0.38
  -8  12   0    4.00    0.31
   7 -12   0    0.36    0.25
  -7  12   0    0.08    0.26
  -7  12   0   -0.01    0.19
   6 -12   0   21.04    0.69
  -6  12   0   21.26    0.72
  -6  12   0   21.34    0.65
   5 -12   0    0.02    0.19
  -5  12   0    0.17    0.18
  -5  12   0    0.16    0.23
   4 -12   0    2.66    0.28
  -4  12   0    2.91    0.33
  -4  12   0    3.07    0.26
   3 -12   0    1.85    0.24
  -3  12   0    1.15    0.26
   2 -12   0   20.01    0.58
   2 -12   0   19.27    0.58
  -2  12   0   19.41    0.69
  -2  12   0   19.67    0.60
   1 -12   0    8.20    0.35
   1 -12   0    8.06    0.38
  -1  12   0    8.97    0.48
   0 -12   0    0.04    0.19
   0  12   0    0.25    0.25
  -1 -12   0    2.16    0.26
   1  12   0    2.08    0.31
  -2 -12   0    0.65    0.24
   2  12   0    0.70    0.26
  -3 -12   0    1.74    0.28
   3  12   0    1.80    0.34
  -4 -12   0    0.96    0.29
   4  12   0    0.86    0.30
  -5 -12   0    1.02    0.29
   5  12   0    0.56    0.30
  -6 -12   0    0.22    0.28
   6  12   0    0.29    0.30
  -7 -12   0   10.59    0.61
   7  12   0   10.04    0.63
  -8 -12   0    0.94    0.34
   8  12   0    1.44    0.38
  -9 -12   0   -0.23    0.35
   9  12   0   -0.12    0.35
 -10 -12   0    0.62    0.40
  10  12   0    0.30    0.39
  14 -13   0    0.77    0.41
 -14  13   0    0.98    0.40
  13 -13   0    0.12    0.36
 -13  13   0    0.17    0.35
  12 -13   0    3.00    0.45
 -12  13   0    2.67    0.41
 -12  13   0    3.44    0.37
  11 -13   0    3.16    0.42
 -11  13   0    3.11    0.38
 -11  13   0    2.74    0.35
  10 -13   0    6.52    0.48
 -10  13   0    5.29    0.38
 -10  13   0    5.07    0.45
   9 -13   0    0.28    0.28
  -9  13   0    0.54    0.25
  -9  13   0    0.07    0.27
   8 -13   0    6.07    0.43
  -8  13   0    7.17    0.40
  -8  13   0    6.22    0.45
   7 -13   0    5.15    0.41
  -7  13   0    5.54    0.38
  -7  13   0    4.17    0.39
   6 -13   0    0.35    0.23
  -6  13   0    0.08    0.25
  -6  13   0   -0.07    0.21
   5 -13   0    3.75    0.32
  -5  13   0    3.25    0.31
  -5  13   0    3.53    0.36
   4 -13   0    3.01    0.29
  -4  13   0    3.48    0.36
   3 -13   0    1.09    0.24
  -3  13   0    1.35    0.31
   2 -13   0    2.05    0.24
  -2  13   0    1.83    0.31
   1 -13   0    1.05    0.23
  -1  13   0    1.37    0.30
   0 -13   0    0.03    0.22
   0  13   0    0.00    0.25
  -1 -13   0    0.09    0.21
   1  13   0    0.08    0.26
  -2 -13   0    0.45    0.26
   2  13   0    0.61    0.28
   3  13   0    1.08    0.32
  -4 -13   0    0.18    0.29
   4  13   0   -0.02    0.32
  -5 -13   0    0.01    0.30
   5  13   0   -0.30    0.32
  -6 -13   0    0.22    0.33
   6  13   0    0.73    0.37
  -7 -13   0    3.79    0.43
   7  13   0    3.66    0.46
  -8 -13   0    0.33    0.37
   8  13   0    0.11    0.38
  -9 -13   0    0.26    0.36
   9  13   0    0.04    0.40
  14 -14   0    4.81    0.56
 -14  14   0    3.52    0.49
  13 -14   0    1.97    0.47
 -13  14   0    2.14    0.43
  12 -14   0    0.29    0.36
 -12  14   0   -0.12    0.34
  11 -14   0    1.02    0.36
 -11  14   0    0.70    0.35
  10 -14   0    8.58    0.59
 -10  14   0    7.61    0.54
   9 -14   0    1.02    0.34
  -9  14   0    0.30    0.30
   8 -14   0    0.88    0.30
  -8  14   0    0.74    0.33
   7 -14   0    7.65    0.46
  -7  14   0    6.33    0.47
   6 -14   0    7.18    0.48
  -6  14   0    8.00    0.50
   5 -14   0    4.71    0.37
  -5  14   0    5.10    0.45
   4 -14   0    1.70    0.28
  -4  14   0    1.46    0.32
   3 -14   0    4.68    0.35
  -3  14   0    4.94    0.43
  -2  14   0    1.23    0.32
  -1  14   0    6.26    0.47
   0 -14   0   -0.26    0.23
   0  14   0   -0.17    0.28
  -1 -14   0    2.12    0.31
   1  14   0    2.35    0.39
  -2 -14   0    0.16    0.27
   2  14   0   -0.01    0.32
  -3 -14   0    8.62    0.49
   3  14   0    8.48    0.56
  -4 -14   0   -0.17    0.29
   4  14   0   -0.05    0.35
  -5 -14   0    1.69    0.37
   5  14   0    1.57    0.41
  -6 -14   0    0.71    0.34
   6  14   0    1.15    0.41
  -7 -14   0    0.52    0.37
   7  14   0    0.29    0.40
   8  14   0    1.04    0.44
  13 -15   0   -0.56    0.40
 -13  15   0    0.27    0.39
  12 -15   0    0.47    0.40
 -12  15   0   -0.21    0.36
  11 -15   0    0.15    0.37
 -11  15   0    0.01    0.32
  10 -15   0   10.30    0.61
 -10  15   0   10.45    0.60
   9 -15   0    0.48    0.35
  -9  15   0    1.10    0.35
   8 -15   0    4.36    0.44
  -8  15   0    3.47    0.42
   7 -15   0   -0.07    0.30
  -7  15   0    0.07    0.30
   6 -15   0    3.15    0.36
  -6  15   0    2.69    0.39
   5 -15   0   -0.18    0.27
  -5  15   0    0.14    0.30
   4 -15   0   -0.20    0.25
  -4  15   0   -0.30    0.31
  -3  15   0    0.17    0.31
  -2  15   0    0.45    0.31
  -1  15   0    0.24    0.32
   0  15   0    0.95    0.37
  -1 -15   0    0.11    0.27
   1  15   0    0.23    0.35
  -2 -15   0   -0.25    0.28
   2  15   0    0.07    0.33
  -3 -15   0    0.27    0.31
   3  15   0    0.31    0.37
  -4 -15   0   -0.05    0.30
   4  15   0   -0.19    0.34
  -5 -15   0   -0.66    0.30
   5  15   0   -0.08    0.35
  -6 -15   0   -0.17    0.36
   6  15   0    0.95    0.43
  11 -16   0    0.68    0.42
 -11  16   0    0.74    0.40
  10 -16   0    0.60    0.39
 -10  16   0    0.99    0.38
   9 -16   0    2.18    0.39
  -9  16   0    1.41    0.40
   8 -16   0    4.21    0.47
  -8  16   0    6.26    0.53
   7 -16   0    0.08    0.32
  -7  16   0   -0.35    0.31
   6 -16   0    1.70    0.36
  -6  16   0    1.20    0.38
  -4  16   0   -0.33    0.32
  -3  16   0    2.93    0.42
  -2  16   0    0.37    0.38
  -1  16   0    5.52    0.53
   0  16   0    0.34    0.38
   1  16   0    0.17    0.35
  -2 -16   0    0.15    0.33
   2  16   0    0.13    0.38
  -3 -16   0    2.75    0.40
   3  16   0    2.06    0.46
  -4 -16   0    0.00    0.33
   4  16   0    0.76    0.42
  -5 -16   0    1.28    0.39
   5  16   0    1.37    0.47
  10 -17   0    0.58    0.41
 -10  17   0   -0.57    0.38
   9 -17   0    0.55    0.38
  -9  17   0    1.20    0.39
   8 -17   0    0.44    0.38
  -8  17   0    0.44    0.36
   7 -17   0    3.67    0.44
  -7  17   0    2.66    0.46
  -6  17   0    0.80    0.39
  -5  17   0    3.13    0.45
  -4  17   0   -0.57    0.34
  -3  17   0    2.19    0.46
  -2  17   0    0.76    0.42
  -1  17   0    0.64    0.41
   0  17   0    0.43    0.38
   1  17   0    9.70    0.67
   2  17   0    1.38    0.47
   3  17   0    4.23    0.55
  -7  18   0    2.52    0.48
  -6  18   0   -0.11    0.37
  -5  18   0    0.47    0.42
  -4  18   0    0.61    0.42
  -3  18   0    1.50    0.46
  -2  18   0    0.13    0.43
  -1  18   0    1.01    0.43
  -1  18  -1    0.86    0.45
  -2  18  -1    3.00    0.51
  -3  18  -1    0.24    0.43
  -4  18  -1    0.76    0.43
  -5  18  -1    1.34    0.42
  -6  18  -1    0.69    0.42
  -7  18  -1    0.23    0.41
   3  17  -1    0.24    0.44
   2  17  -1    5.70    0.60
   1  17  -1   -0.09    0.39
   0  17  -1    0.36    0.41
  -1  17  -1    0.07    0.39
  -2  17  -1   -0.16    0.39
  -3  17  -1    0.37    0.37
  -4  17  -1   -0.06    0.37
  -5  17  -1    1.25    0.39
  -6  17  -1    0.99    0.38
  -7  17  -1    1.35    0.41
   7 -17   1    0.70    0.36
  -8  17  -1    2.46    0.46
   8 -17   1    2.89    0.44
  -9  17  -1    5.02    0.51
   9 -17   1    4.88    0.50
 -10  17  -1    1.04    0.43
  10 -17   1    1.19    0.44
   5  16  -1    1.45    0.47
  -5 -16   1    1.19    0.41
   4  16  -1    1.24    0.44
  -4 -16   1    0.36    0.37
   3  16  -1    0.20    0.40
  -3 -16   1    0.53    0.35
   2  16  -1    1.76    0.45
  -2 -16   1    2.58    0.38
   1  16  -1    0.36    0.36
   0  16  -1    0.17    0.38
  -1  16  -1    5.40    0.52
  -2  16  -1   -0.41    0.35
  -3  16  -1    1.79    0.41
  -4  16  -1   -0.15    0.34
  -5  16  -1    0.05    0.35
  -6  16  -1    0.59    0.34
   6 -16   1    0.13    0.31
  -7  16  -1    0.81    0.38
   7 -16   1    0.98    0.36
  -8  16  -1   -0.03    0.35
   8 -16   1    0.11    0.34
   9 -16   1    1.62    0.41
 -10  16  -1    1.13    0.41
  10 -16   1    1.31    0.41
 -11  16  -1    3.42    0.49
  11 -16   1    3.09    0.49
   6  15  -1    3.12    0.51
  -6 -15   1    2.54    0.42
   5  15  -1    0.71    0.38
  -5 -15   1    0.12    0.35
   4  15  -1    2.41    0.44
  -4 -15   1    1.81    0.36
   3  15  -1    0.25    0.35
  -3 -15   1    0.02    0.30
   2  15  -1    0.07    0.33
  -2 -15   1    0.25    0.30
   1  15  -1   -0.13    0.34
  -1 -15   1   -0.04    0.27
   0  15  -1   11.16    0.67
  -1  15  -1    1.93    0.38
  -2  15  -1   -0.09    0.30
  -3  15  -1    0.83    0.33
  -4  15  -1   16.05    0.73
  -5  15  -1    0.16    0.32
   5 -15   1    0.26    0.28
  -6  15  -1    1.58    0.37
   6 -15   1    1.23    0.33
  -7  15  -1    3.51    0.43
   7 -15   1    3.51    0.41
  -8  15  -1    3.71    0.44
   8 -15   1    3.61    0.42
  -9  15  -1    1.41    0.38
   9 -15   1    1.20    0.36
 -10  15  -1    1.27    0.38
  10 -15   1    0.43    0.34
 -11  15  -1    0.44    0.36
  11 -15   1    0.36    0.38
 -12  15  -1   -0.04    0.37
  12 -15   1   -0.06    0.37
   8  14  -1    1.50    0.46
  -8 -14   1    1.44    0.40
   7  14  -1    0.99    0.42
  -7 -14   1    0.97    0.39
   6  14  -1    1.46    0.42
  -6 -14   1    0.64    0.36
   5  14  -1    0.17    0.34
  -5 -14   1   -0.30    0.29
   4  14  -1    0.22    0.36
  -4 -14   1   -0.46    0.29
   3  14  -1    2.75    0.40
  -3 -14   1    2.10    0.34
   2  14  -1    0.33    0.33
  -2 -14   1    0.23    0.25
   1  14  -1    1.77    0.35
  -1 -14   1    1.13    0.28
   0  14  -1   -0.13    0.27
   0 -14   1    0.09    0.24
  -1  14  -1    1.95    0.37
  -2  14  -1    1.40    0.33
  -3  14  -1    0.34    0.29
   3 -14   1    0.47    0.24
  -4  14  -1    2.95    0.37
   4 -14   1    2.75    0.31
  -5  14  -1    0.77    0.32
   5 -14   1    1.09    0.28
  -6  14  -1   -0.07    0.27
   6 -14   1   -0.14    0.26
  -7  14  -1    2.57    0.38
   7 -14   1    2.52    0.34
  -8  14  -1   -0.25    0.28
   8 -14   1   -0.06    0.28
  -9  14  -1    0.33    0.33
   9 -14   1    0.75    0.32
 -10  14  -1    5.39    0.46
  10 -14   1    5.25    0.50
 -11  14  -1    3.82    0.44
  11 -14   1    2.83    0.42
 -12  14  -1    0.93    0.35
  12 -14   1    0.26    0.36
 -13  14  -1    0.03    0.34
  13 -14   1   -0.27    0.37
   9  13  -1    4.00    0.51
  -9 -13   1    2.79    0.45
   8  13  -1   -0.17    0.37
  -8 -13   1   -0.06    0.33
   7  13  -1    0.09    0.34
  -7 -13   1    0.42    0.35
   6  13  -1    0.60    0.37
  -6 -13   1    0.52    0.31
   5  13  -1   -0.05    0.31
  -5 -13   1    0.02    0.29
   4  13  -1    4.00    0.44
  -4 -13   1    4.09    0.38
   3  13  -1    3.48    0.41
  -3 -13   1    2.49    0.34
   2  13  -1    1.20    0.34
  -2 -13   1    1.13    0.28
   1  13  -1    2.25    0.34
  -1 -13   1    2.54    0.29
   0  13  -1    2.12    0.34
   0 -13   1    2.88    0.29
  -1  13  -1   -0.04    0.27
   1 -13   1    0.13    0.20
  -2  13  -1    2.08    0.32
   2 -13   1    2.47    0.26
  -3  13  -1    2.95    0.34
   3 -13   1    3.36    0.29
  -4  13  -1    4.51    0.39
   4 -13   1    4.86    0.35
  -5  13  -1    0.63    0.27
   5 -13   1    0.79    0.25
  -6  13  -1   -0.06    0.25
   6 -13   1    0.07    0.23
  -7  13  -1    0.07    0.24
  -7  13  -1    0.36    0.28
   7 -13   1    0.05    0.25
  -8  13  -1    0.07    0.22
  -8  13  -1    0.09    0.29
   8 -13   1   -0.29    0.25
  -9  13  -1    1.68    0.34
  -9  13  -1    1.68    0.29
   9 -13   1    1.81    0.33
 -10  13  -1   -0.16    0.29
 -10  13  -1    0.25    0.25
  10 -13   1   -0.16    0.32
 -11  13  -1    0.31    0.30
  11 -13   1    0.23    0.35
 -12  13  -1    0.62    0.35
  12 -13   1    0.14    0.36
 -13  13  -1    5.78    0.49
  13 -13   1    8.15    0.61
 -14  13  -1    0.87    0.36
  14 -13   1    0.80    0.40
  10  12  -1    1.33    0.42
 -10 -12   1    2.49    0.46
   9  12  -1   -0.31    0.35
  -9 -12   1   -0.02    0.34
   8  12  -1   -0.46    0.33
  -8 -12   1    0.06    0.32
   7  12  -1    1.14    0.37
  -7 -12   1    1.18    0.33
   6  12  -1    0.18    0.32
  -6 -12   1    0.48    0.30
   5  12  -1    1.16    0.32
  -5 -12   1    1.82    0.33
   4  12  -1    1.75    0.35
  -4 -12   1    2.15    0.33
   3  12  -1    1.04    0.29
  -3 -12   1    0.66    0.26
   2  12  -1    0.85    0.30
  -2 -12   1    0.89    0.23
   1  12  -1    0.14    0.27
  -1 -12   1    0.39    0.20
   0  12  -1    0.07    0.23
   0 -12   1    0.28    0.20
  -1  12  -1    4.86    0.39
   1 -12   1    3.57    0.27
   1 -12   1    4.06    0.27
  -2  12  -1    6.50    0.43
   2 -12   1    5.59    0.34
   2 -12   1    6.24    0.34
  -3  12  -1    0.12    0.18
  -3  12  -1    0.08    0.22
   3 -12   1    0.22    0.19
  -4  12  -1    3.52    0.35
  -4  12  -1    4.02    0.29
   4 -12   1    4.33    0.31
  -5  12  -1   11.26    0.44
  -5  12  -1   12.70    0.54
   5 -12   1   12.04    0.50
  -6  12  -1   10.36    0.50
  -6  12  -1   10.25    0.45
   6 -12   1    9.45    0.46
  -7  12  -1    0.18    0.21
  -7  12  -1    0.12    0.24
   7 -12   1    0.50    0.25
  -8  12  -1    4.07    0.34
  -8  12  -1    4.15    0.39
   8 -12   1    4.27    0.38
  -9  12  -1    0.35    0.24
  -9  12  -1    0.45    0.26
   9 -12   1    0.09    0.26
 -10  12  -1    1.99    0.32
 -10  12  -1    1.47    0.28
  10 -12   1    1.82    0.34
 -11  12  -1    5.03    0.38
 -11  12  -1    4.06    0.40
  11 -12   1    5.27    0.46
 -12  12  -1    1.41    0.30
 -12  12  -1    2.00    0.34
  12 -12   1    1.66    0.38
 -13  12  -1   -0.08    0.32
 -13  12  -1    0.48    0.28
  13 -12   1   -0.07    0.36
 -14  12  -1    0.66    0.37
  14 -12   1    0.00    0.35
 -15  12  -1    1.41    0.41
  15 -12   1    0.87    0.44
  11  11  -1    1.68    0.40
 -11 -11   1    1.17    0.39
  10  11  -1    1.88    0.39
 -10 -11   1    1.53    0.39
   9  11  -1    0.57    0.36
  -9 -11   1    0.53    0.33
   8  11  -1    1.23    0.36
  -8 -11   1    1.28    0.33
   7  11  -1   -0.29    0.30
  -7 -11   1    0.00    0.27
   6  11  -1    0.11    0.27
  -6 -11   1    0.32    0.23
  -6 -11   1    0.02    0.26
   5  11  -1    4.24    0.38
  -5 -11   1    4.71    0.33
  -5 -11   1    3.52    0.35
   4  11  -1    6.08    0.43
  -4 -11   1    5.70    0.35
  -4 -11   1    5.10    0.37
   3  11  -1   -0.04    0.24
  -3 -11   1   -0.18    0.20
  -3 -11   1    0.02    0.19
   2  11  -1    2.61    0.32
  -2 -11   1    2.07    0.25
  -2 -11   1    2.48    0.24
   1  11  -1   -0.13    0.21
  -1 -11   1    0.03    0.17
  -1 -11   1    0.19    0.18
   0  11  -1    0.33    0.23
   0 -11   1    0.26    0.17
   0 -11   1    0.38    0.18
   0 -11   1    0.34    0.15
  -1  11  -1   22.93    0.73
   1 -11   1   23.42    0.63
   1 -11   1   22.39    0.63
   1 -11   1   22.78    0.61
  -2  11  -1    0.39    0.17
  -2  11  -1    0.31    0.23
   2 -11   1    0.32    0.16
   2 -11   1    0.30    0.16
  -3  11  -1    7.77    0.36
  -3  11  -1    8.77    0.44
   3 -11   1    8.16    0.33
   3 -11   1    7.68    0.37
  -4  11  -1    2.19    0.27
  -4  11  -1    2.20    0.23
   4 -11   1    2.48    0.25
  -5  11  -1   52.00    1.28
  -5  11  -1   49.98    1.16
   5 -11   1   50.80    1.22
  -6  11  -1    0.34    0.24
  -6  11  -1    0.60    0.19
   6 -11   1    0.26    0.22
  -7  11  -1    5.02    0.32
  -7  11  -1    5.39    0.37
   7 -11   1    5.01    0.36
  -8  11  -1    1.11    0.26
  -8  11  -1    1.86    0.26
   8 -11   1    1.01    0.26
  -9  11  -1    9.61    0.43
  -9  11  -1    8.93    0.48
   9 -11   1    9.72    0.49
 -10  11  -1    0.05    0.23
 -10  11  -1    0.71    0.28
  10 -11   1    0.11    0.29
 -11  11  -1   -0.20    0.23
 -11  11  -1    0.34    0.26
  11 -11   1    0.70    0.31
 -12  11  -1   -0.03    0.24
 -12  11  -1    0.23    0.28
  12 -11   1    0.53    0.31
 -13  11  -1    4.08    0.39
 -13  11  -1    4.31    0.44
  13 -11   1    4.08    0.46
 -14  11  -1    1.42    0.37
 -14  11  -1    2.01    0.35
  14 -11   1    1.80    0.42
 -15  11  -1    0.15    0.33
  15 -11   1    0.36    0.40
  12  10  -1    0.60    0.39
 -12 -10   1   -0.03    0.39
  11  10  -1    0.08    0.36
 -11 -10   1    0.34    0.34
  10  10  -1    1.40    0.38
 -10 -10   1    1.05    0.34
   9  10  -1    0.06    0.31
  -9 -10   1    0.11    0.32
  -9 -10   1   -0.07    0.27
   8  10  -1    0.01    0.28
  -8 -10   1   -0.29    0.23
  -8 -10   1    0.04    0.28
   7  10  -1    0.00    0.26
  -7 -10   1   -0.07    0.25
  -7 -10   1   -0.10    0.21
   6  10  -1   10.34    0.55
  -6 -10   1    9.22    0.48
  -6 -10   1    9.16    0.44
   5  10  -1    1.87    0.28
  -5 -10   1    1.85    0.24
  -5 -10   1    2.32    0.29
   4  10  -1    0.11    0.22
  -4 -10   1    0.46    0.22
  -4 -10   1    0.44    0.19
   3  10  -1    3.88    0.33
  -3 -10   1    2.83    0.27
  -3 -10   1    3.18    0.25
   2  10  -1   15.14    0.56
  -2 -10   1   15.31    0.48
  -2 -10   1   14.50    0.50
   1  10  -1    1.48    0.25
  -1 -10   1    1.83    0.21
  -1 -10   1    1.61    0.16
  -1 -10   1    1.56    0.20
   0  10  -1    2.67    0.23
   0  10  -1    2.63    0.27
   0 -10   1    2.94    0.19
   0 -10   1    2.23    0.21
   0 -10   1    2.60    0.22
  -1  10  -1    2.47    0.21
  -1  10  -1    2.85    0.27
   1 -10   1    3.34    0.23
   1 -10   1    3.01    0.22
   1 -10   1    3.15    0.21
  -2  10  -1   15.09    0.54
  -2  10  -1   15.11    0.47
   2 -10   1   14.06    0.43
   2 -10   1   14.50    0.46
   2 -10   1   14.08    0.45
  -3  10  -1   38.46    1.02
  -3  10  -1   39.68    0.93
   3 -10   1   40.74    0.90
   3 -10   1   39.21    0.95
   3 -10   1   40.57    0.92
  -4  10  -1    5.47    0.36
  -4  10  -1    5.81    0.30
   4 -10   1    6.26    0.26
   4 -10   1    6.01    0.33
  -5  10  -1    5.61    0.30
  -5  10  -1    6.63    0.41
   5 -10   1    6.31    0.36
  -6  10  -1    6.41    0.38
  -6  10  -1    5.83    0.31
   6 -10   1    5.55    0.37
  -7  10  -1   13.27    0.46
  -7  10  -1   12.61    0.52
   7 -10   1   14.93    0.55
  -8  10  -1    2.60    0.25
  -8  10  -1    2.22    0.27
   8 -10   1    2.30    0.29
  -9  10  -1    8.18    0.40
  -9  10  -1    7.58    0.43
   9 -10   1    7.31    0.44
 -10  10  -1    2.99    0.32
 -10  10  -1    3.21    0.29
  10 -10   1    3.20    0.35
 -11  10  -1   17.74    0.60
 -11  10  -1   17.80    0.68
  11 -10   1   17.67    0.72
 -12  10  -1   -0.39    0.27
 -12  10  -1   -0.03    0.25
  12 -10   1   -0.04    0.29
 -13  10  -1    3.04    0.39
 -13  10  -1    3.05    0.34
  13 -10   1    2.71    0.40
 -14  10  -1    0.83    0.35
 -14  10  -1    0.46    0.28
  14 -10   1    0.70    0.36
 -15  10  -1   11.56    0.59
 -15  10  -1   10.54    0.63
  15 -10   1   10.18    0.69
 -16  10  -1    2.13    0.44
  16 -10   1    1.64    0.46
  13   9  -1    2.48    0.45
 -13  -9   1    1.69    0.45
  12   9  -1    2.67    0.44
 -12  -9   1    2.62    0.45
  11   9  -1   -0.20    0.33
 -11  -9   1   -0.10    0.30
 -11  -9   1    0.49    0.34
  10   9  -1   -0.23    0.30
 -10  -9   1    0.01    0.29
 -10  -9   1   -0.23    0.25
   9   9  -1    3.19    0.38
  -9  -9   1    4.31    0.41
  -9  -9   1    5.00    0.36
   8   9  -1    2.31    0.33
  -8  -9   1    3.25    0.31
  -8  -9   1    2.66    0.33
   7   9  -1    0.57    0.25
  -7  -9   1    0.30    0.21
  -7  -9   1    0.54    0.24
   6   9  -1    1.25    0.26
  -6  -9   1    1.05    0.22
  -6  -9   1    1.09    0.25
   5   9  -1    1.18    0.25
  -5  -9   1    0.87    0.20
  -5  -9   1    0.97    0.23
   4   9  -1    5.99    0.41
  -4  -9   1    5.82    0.30
  -4  -9   1    5.99    0.36
   3   9  -1   37.13    0.96
  -3  -9   1   34.63    0.86
  -3  -9   1   37.45    0.93
   2   9  -1    0.21    0.18
  -2  -9   1    0.32    0.16
  -2  -9   1    0.11    0.14
  -2  -9   1    0.16    0.10
   1   9  -1    0.56    0.19
   1   9  -1    0.10    0.13
  -1  -9   1    0.17    0.11
  -1  -9   1    0.11    0.15
  -1  -9   1    0.28    0.13
   0   9  -1    6.56    0.35
   0   9  -1    6.33    0.30
   0  -9   1    7.00    0.25
   0  -9   1    5.76    0.29
   0  -9   1    5.87    0.27
  -1   9  -1   32.04    0.74
  -1   9  -1   30.68    0.84
   1  -9   1   30.88    0.73
   1  -9   1   30.46    0.74
   1  -9   1   30.58    0.73
  -2   9  -1   -0.09    0.13
  -2   9  -1   -0.04    0.15
   2  -9   1    0.00    0.12
   2  -9   1   -0.05    0.12
   2  -9   1    0.11    0.11
  -3   9  -1   12.90    0.48
   3  -9   1   12.14    0.35
   3  -9   1   11.22    0.39
   3  -9   1   12.35    0.38
  -4   9  -1    7.58    0.31
  -4   9  -1    7.87    0.37
   4  -9   1    7.48    0.33
   4  -9   1    7.80    0.27
   4  -9   1    7.83    0.30
  -5   9  -1   12.59    0.42
  -5   9  -1   13.28    0.48
   5  -9   1   12.82    0.46
  -6   9  -1    0.06    0.16
  -6   9  -1    0.32    0.16
   6  -9   1   -0.13    0.17
  -7   9  -1    2.55    0.23
  -7   9  -1    2.48    0.26
   7  -9   1    2.53    0.27
  -8   9  -1    5.31    0.35
  -8   9  -1    5.04    0.29
   8  -9   1    4.72    0.34
  -9   9  -1   11.93    0.44
  -9   9  -1   12.10    0.49
   9  -9   1   12.61    0.53
 -10   9  -1    0.11    0.23
 -10   9  -1    0.31    0.20
  10  -9   1    0.04    0.24
 -11   9  -1    4.57    0.37
 -11   9  -1    4.93    0.33
  11  -9   1    5.38    0.43
 -12   9  -1    0.79    0.28
 -12   9  -1    0.53    0.25
  12  -9   1    0.85    0.32
 -13   9  -1   15.45    0.65
 -13   9  -1   13.33    0.55
  13  -9   1   14.88    0.70
 -14   9  -1    0.02    0.29
 -14   9  -1   -0.02    0.26
  14  -9   1   -0.29    0.33
 -15   9  -1    5.57    0.47
 -15   9  -1    5.93    0.45
  15  -9   1    5.85    0.55
 -16   9  -1    0.32    0.36
 -16   9  -1    0.66    0.33
  16  -9   1    0.09    0.40
  13   8  -1    0.11    0.35
 -13  -8   1    0.17    0.38
  12   8  -1    0.91    0.36
 -12  -8   1   -0.13    0.28
 -12  -8   1    0.60    0.37
  11   8  -1   -0.27    0.30
 -11  -8   1    0.14    0.30
 -11  -8   1   -0.61    0.26
  10   8  -1   14.65    0.62
 -10  -8   1   14.94    0.67
 -10  -8   1   14.23    0.55
   9   8  -1    0.44    0.28
  -9  -8   1    0.42    0.28
  -9  -8   1    0.35    0.24
   8   8  -1    7.22    0.48
  -8  -8   1    9.06    0.47
  -8  -8   1    7.85    0.41
   7   8  -1    5.05    0.37
  -7  -8   1    4.29    0.30
  -7  -8   1    4.34    0.35
   6   8  -1   14.64    0.58
  -6  -8   1   15.40    0.56
  -6  -8   1   15.42    0.48
   5   8  -1    3.96    0.31
  -5  -8   1    3.36    0.24
  -5  -8   1    3.30    0.28
   4   8  -1   20.38    0.62
  -4  -8   1   19.53    0.54
  -4  -8   1   20.56    0.61
   3   8  -1   40.13    1.00
  -3  -8   1   38.55    0.90
  -3  -8   1   40.20    0.97
   2   8  -1    9.17    0.39
   2   8  -1    9.16    0.34
  -2  -8   1    8.90    0.27
  -2  -8   1    9.10    0.34
  -2  -8   1    9.35    0.36
   1   8  -1    5.22    0.35
   1   8  -1    5.83    0.26
  -1  -8   1    6.03    0.27
  -1  -8   1    6.52    0.22
  -1  -8   1    5.96    0.29
   0   8  -1   33.72    0.78
   0   8  -1   34.42    0.88
   0  -8   1   33.64    0.78
   0  -8   1   35.26    0.76
   0  -8   1   34.17    0.81
  -1   8  -1    2.81    0.23
  -1   8  -1    3.12    0.19
   1  -8   1    2.68    0.18
   1  -8   1    2.78    0.17
   1  -8   1    2.74    0.17
  -2   8  -1    0.22    0.11
  -2   8  -1    0.51    0.15
   2  -8   1    0.24    0.11
   2  -8   1    0.45    0.12
   2  -8   1    0.29    0.12
  -3   8  -1   62.90    1.34
  -3   8  -1   63.88    1.45
   3  -8   1   66.30    1.34
   3  -8   1   63.65    1.39
   3  -8   1   63.18    1.33
  -4   8  -1    5.42    0.25
  -4   8  -1    5.43    0.30
   4  -8   1    5.37    0.20
   4  -8   1    6.21    0.30
   4  -8   1    5.83    0.25
  -5   8  -1    2.83    0.21
  -5   8  -1    3.46    0.25
   5  -8   1    2.94    0.15
   5  -8   1    3.28    0.21
   5  -8   1    3.24    0.24
  -6   8  -1    1.53    0.18
  -6   8  -1    1.32    0.20
   6  -8   1    1.54    0.21
  -7   8  -1   95.42    2.08
  -7   8  -1   93.58    1.95
   7  -8   1   94.97    2.07
  -8   8  -1    3.18    0.24
  -8   8  -1    3.54    0.29
   8  -8   1    2.97    0.28
  -9   8  -1    0.35    0.17
  -9   8  -1    0.28    0.21
   9  -8   1    0.48    0.21
 -10   8  -1    2.32    0.25
 -10   8  -1    2.42    0.29
  10  -8   1    1.97    0.29
 -11   8  -1    8.96    0.49
 -11   8  -1    8.03    0.41
  11  -8   1    8.74    0.49
 -12   8  -1    6.36    0.40
 -12   8  -1    6.49    0.43
  12  -8   1    6.55    0.47
 -13   8  -1    4.75    0.37
 -13   8  -1    4.77    0.40
  13  -8   1    5.15    0.46
 -14   8  -1    0.51    0.28
 -14   8  -1    0.09    0.31
  14  -8   1    0.35    0.35
 -15   8  -1    0.33    0.31
 -15   8  -1   -0.15    0.29
  15  -8   1    0.10    0.34
 -16   8  -1    5.94    0.51
 -16   8  -1    5.56    0.45
  16  -8   1    6.72    0.56
  14   7  -1    1.02    0.38
 -14  -7   1    0.03    0.36
  13   7  -1   -0.03    0.34
 -13  -7   1    0.03    0.30
 -13  -7   1   -0.13    0.34
  12   7  -1    6.51    0.46
 -12  -7   1    5.66    0.41
 -12  -7   1    6.04    0.51
  11   7  -1    4.47    0.41
 -11  -7   1    4.81    0.37
 -11  -7   1    4.54    0.42
  10   7  -1    2.37    0.33
 -10  -7   1    1.74    0.27
 -10  -7   1    2.25    0.32
   9   7  -1   -0.10    0.24
  -9  -7   1   -0.05    0.20
  -9  -7   1   -0.22    0.23
   8   7  -1    0.05    0.23
  -8  -7   1    0.21    0.20
  -8  -7   1    0.51    0.23
   7   7  -1   15.96    0.55
  -7  -7   1   14.07    0.55
  -7  -7   1   14.63    0.48
   6   7  -1   13.22    0.49
  -6  -7   1   13.24    0.50
  -6  -7   1   12.79    0.42
   5   7  -1    5.37    0.36
  -5  -7   1    5.67    0.29
  -5  -7   1    6.31    0.34
   4   7  -1   11.17    0.42
  -4  -7   1   11.21    0.36
  -4  -7   1   11.20    0.42
   3   7  -1   18.45    0.56
   3   7  -1   18.28    0.48
  -3  -7   1   17.72    0.53
  -3  -7   1   19.14    0.41
  -3  -7   1   18.22    0.49
   2   7  -1    2.34    0.20
   2   7  -1    2.15    0.16
  -2  -7   1    2.27    0.18
  -2  -7   1    2.53    0.14
  -2  -7   1    2.35    0.17
   1   7  -1    0.11    0.12
   1   7  -1    0.08    0.10
  -1  -7   1   -0.14    0.11
  -1  -7   1    0.14    0.10
  -1  -7   1   -0.02    0.07
   0   7  -1   63.99    1.45
   0   7  -1   65.91    1.34
   0  -7   1   64.15    1.38
   0  -7   1   65.15    1.33
   0  -7   1   64.97    1.35
  -1   7  -1   10.30    0.37
  -1   7  -1   11.01    0.34
   1  -7   1   11.07    0.32
   1  -7   1   10.99    0.32
   1  -7   1   10.75    0.32
  -2   7  -1    7.83    0.34
  -2   7  -1    8.01    0.28
   2  -7   1    7.94    0.28
   2  -7   1    8.64    0.27
   2  -7   1    8.38    0.25
  -3   7  -1    3.19    0.18
  -3   7  -1    2.19    0.19
   3  -7   1    2.63    0.15
   3  -7   1    2.27    0.16
   3  -7   1    2.83    0.19
  -4   7  -1    4.07    0.21
  -4   7  -1    4.32    0.26
   4  -7   1    4.08    0.20
   4  -7   1    4.30    0.24
   4  -7   1    4.43    0.17
  -5   7  -1   18.44    0.54
  -5   7  -1   18.45    0.49
   5  -7   1   18.73    0.48
   5  -7   1   19.37    0.55
  -6   7  -1    3.82    0.14
  -6   7  -1    4.03    0.26
  -6   7  -1    4.02    0.23
   6  -7   1    4.05    0.27
   6  -7   1    4.05    0.23
  -7   7  -1   19.56    0.53
  -7   7  -1   19.30    0.59
   7  -7   1   21.05    0.61
  -8   7  -1    0.45    0.18
  -8   7  -1    0.23    0.15
   8  -7   1    0.32    0.18
  -9   7  -1   25.44    0.66
  -9   7  -1   25.25    0.72
   9  -7   1   24.61    0.74
 -10   7  -1    0.05    0.18
 -10   7  -1    0.04    0.19
  10  -7   1   -0.06    0.23
 -11   7  -1   13.94    0.50
 -11   7  -1   13.44    0.56
  11  -7   1   14.09    0.58
 -12   7  -1    2.37    0.32
 -12   7  -1    3.04    0.29
  12  -7   1    2.10    0.33
 -13   7  -1   19.02    0.69
 -13   7  -1   20.05    0.66
  13  -7   1   19.50    0.74
 -14   7  -1    2.13    0.31
 -14   7  -1    2.76    0.35
  14  -7   1    3.20    0.42
 -15   7  -1    0.04    0.32
 -15   7  -1    0.01    0.28
  15  -7   1   -0.04    0.32
 -16   7  -1    0.75    0.31
 -16   7  -1    0.47    0.36
  16  -7   1    0.65    0.40
 -17   7  -1    1.01    0.41
 -17   7  -1    1.59    0.37
  17  -7   1    1.34    0.42
  14   6  -1    0.12    0.35
 -14  -6   1    0.28    0.34
 -14  -6   1    0.23    0.31
  13   6  -1    1.24    0.35
 -13  -6   1    1.04    0.32
 -13  -6   1    0.75    0.36
  12   6  -1    8.20    0.55
 -12  -6   1    9.75    0.56
 -12  -6   1    8.62    0.48
  11   6  -1    4.20    0.39
 -11  -6   1    5.01    0.42
 -11  -6   1    4.74    0.36
  10   6  -1    0.05    0.23
 -10  -6   1    0.13    0.24
 -10  -6   1   -0.02    0.20
   9   6  -1    8.73    0.47
  -9  -6   1    9.47    0.41
  -9  -6   1    8.12    0.46
   8   6  -1    5.39    0.35
  -8  -6   1    4.81    0.31
  -8  -6   1    4.91    0.35
   7   6  -1    4.14    0.29
  -7  -6   1    4.04    0.31
  -7  -6   1    3.88    0.26
   6   6  -1    2.68    0.23
  -6  -6   1    2.75    0.21
  -6  -6   1    2.80    0.25
   5   6  -1   33.04    0.85
  -5  -6   1   33.70    0.78
  -5  -6   1   33.21    0.86
   4   6  -1   16.38    0.35
   4   6  -1   15.62    0.50
   4   6  -1   16.43    0.44
  -4  -6   1   15.37    0.49
  -4  -6   1   16.18    0.44
   3   6  -1    3.41    0.19
   3   6  -1    3.33    0.22
  -3  -6   1    2.83    0.20
  -3  -6   1    3.54    0.12
  -3  -6   1    3.10    0.19
   2   6  -1    0.16    0.09
   2   6  -1    0.17    0.11
  -2  -6   1    0.08    0.09
  -2  -6   1    0.03    0.06
  -2  -6   1    0.02    0.11
   1   6  -1   15.33    0.39
   1   6  -1   14.94    0.45
  -1  -6   1   15.41    0.39
  -1  -6   1   14.90    0.41
  -1  -6   1   15.48    0.36
   0   6  -1    3.98    0.25
   0   6  -1    4.11    0.20
   0  -6   1    4.23    0.18
   0  -6   1    4.07    0.19
   0  -6   1    4.15    0.17
  -1   6  -1   23.89    0.61
  -1   6  -1   23.36    0.55
   1  -6   1   23.57    0.54
   1  -6   1   22.93    0.54
   1  -6   1   23.54    0.54
  -2   6  -1    2.78    0.16
  -2   6  -1    2.47    0.18
   2  -6   1    2.78    0.16
   2  -6   1    2.36    0.13
   2  -6   1    2.78    0.15
  -3   6  -1   74.34    1.48
  -3   6  -1   71.48    1.58
   3  -6   1   73.18    1.48
   3  -6   1   72.66    1.54
   3  -6   1   74.49    1.49
  -4   6  -1   -0.01    0.08
  -4   6  -1   -0.01    0.11
   4  -6   1    0.12    0.09
   4  -6   1    0.04    0.06
   4  -6   1   -0.08    0.11
  -5   6  -1    6.68    0.31
  -5   6  -1    7.49    0.19
  -5   6  -1    7.41    0.26
   5  -6   1    7.17    0.30
   5  -6   1    7.02    0.26
  -6   6  -1    0.12    0.06
  -6   6  -1    0.18    0.13
  -6   6  -1    0.12    0.11
   6  -6   1    0.24    0.14
   6  -6   1    0.05    0.10
  -7   6  -1   28.90    0.63
  -7   6  -1   28.58    0.70
  -7   6  -1   30.63    0.76
   7  -6   1   29.63    0.78
   7  -6   1   29.62    0.68
  -8   6  -1   17.30    0.49
  -8   6  -1   17.77    0.56
   8  -6   1   17.65    0.57
  -9   6  -1   30.83    0.76
  -9   6  -1   31.67    0.84
   9  -6   1   31.63    0.86
 -10   6  -1    3.66    0.27
 -10   6  -1    2.76    0.28
  10  -6   1    3.40    0.32
 -11   6  -1    1.22    0.22
 -11   6  -1    0.60    0.22
  11  -6   1    0.65    0.25
 -12   6  -1    9.15    0.50
 -12   6  -1   10.48    0.43
  12  -6   1   10.98    0.56
 -13   6  -1   17.05    0.66
 -13   6  -1   16.62    0.58
  13  -6   1   16.73    0.69
 -14   6  -1    0.27    0.30
 -14   6  -1   -0.04    0.25
  14  -6   1    0.42    0.31
 -15   6  -1    0.85    0.30
 -15   6  -1    0.33    0.33
  15  -6   1    0.31    0.35
 -16   6  -1    3.31    0.42
 -16   6  -1    3.68    0.40
  16  -6   1    3.05    0.44
 -17   6  -1    3.03    0.41
 -17   6  -1    3.42    0.47
  17  -6   1    3.63    0.49
  15   5  -1   -0.60    0.35
 -15  -5   1   -0.11    0.32
 -15  -5   1    0.49    0.38
  14   5  -1    1.28    0.37
 -14  -5   1    1.82    0.40
 -14  -5   1    1.42    0.34
  13   5  -1    0.59    0.32
 -13  -5   1   -0.08    0.29
 -13  -5   1    0.57    0.27
  12   5  -1    1.39    0.30
 -12  -5   1    1.78    0.34
 -12  -5   1    1.46    0.27
  11   5  -1    0.09    0.26
 -11  -5   1    0.40    0.28
 -11  -5   1    0.32    0.21
  10   5  -1    2.09    0.28
 -10  -5   1    2.18    0.25
 -10  -5   1    1.96    0.31
   9   5  -1   16.42    0.59
  -9  -5   1   16.58    0.51
  -9  -5   1   15.83    0.59
   8   5  -1    9.42    0.44
  -8  -5   1    8.90    0.43
  -8  -5   1    8.74    0.35
   7   5  -1    1.51    0.20
  -7  -5   1    1.82    0.19
  -7  -5   1    2.27    0.23
   6   5  -1    3.79    0.25
   6   5  -1    3.64    0.14
  -6  -5   1    3.19    0.21
  -6  -5   1    4.17    0.28
   5   5  -1    2.60    0.20
   5   5  -1    3.30    0.19
   5   5  -1    2.94    0.12
  -5  -5   1    2.78    0.18
  -5  -5   1    2.44    0.21
   4   5  -1   17.48    0.49
   4   5  -1   18.22    0.44
   4   5  -1   17.85    0.38
  -4  -5   1   16.93    0.50
  -4  -5   1   17.14    0.44
   3   5  -1   23.27    0.48
   3   5  -1   22.48    0.58
   3   5  -1   23.19    0.53
  -3  -5   1   21.92    0.58
  -3  -5   1   22.84    0.53
   2   5  -1  102.73    2.14
   2   5  -1  100.70    2.01
  -2  -5   1  100.53    2.01
  -2  -5   1  103.39    2.02
  -2  -5   1  102.25    2.12
   1   5  -1    0.15    0.07
   1   5  -1    0.08    0.09
  -1  -5   1    0.15    0.09
  -1  -5   1    0.09    0.05
  -1  -5   1    0.12    0.07
   0   5  -1    3.98    0.16
   0   5  -1    4.12    0.21
   0  -5   1    3.89    0.16
   0  -5   1    3.78    0.15
   0  -5   1    3.46    0.15
  -1   5  -1    3.26    0.15
  -1   5  -1    3.13    0.18
   1  -5   1    2.81    0.14
   1  -5   1    3.03    0.14
   1  -5   1    3.20    0.14
  -2   5  -1    6.61    0.26
   2  -5   1    6.54    0.19
   2  -5   1    6.73    0.23
  -3   5  -1  134.70    2.60
  -3   5  -1  130.42    2.76
   3  -5   1  135.79    2.60
   3  -5   1  133.66    2.71
   3  -5   1  133.78    2.67
  -4   5  -1    6.70    0.22
  -4   5  -1    6.31    0.17
  -4   5  -1    6.47    0.25
   4  -5   1    5.91    0.21
   4  -5   1    6.22    0.26
  -5   5  -1  100.07    2.10
  -5   5  -1   98.23    1.99
  -5   5  -1  101.58    1.98
   5  -5   1   99.02    2.08
   5  -5   1   99.07    1.97
  -6   5  -1    0.53    0.14
  -6   5  -1    0.54    0.11
  -6   5  -1    0.43    0.07
   6  -5   1    0.49    0.14
   6  -5   1    0.71    0.10
  -7   5  -1   19.10    0.46
  -7   5  -1   19.84    0.51
  -7   5  -1   18.98    0.55
   7  -5   1   20.74    0.58
   7  -5   1   19.60    0.49
  -8   5  -1    2.64    0.18
  -8   5  -1    2.47    0.22
  -8   5  -1    2.92    0.20
   8  -5   1    2.36    0.24
  -9   5  -1   16.09    0.48
  -9   5  -1   16.36    0.54
   9  -5   1   15.56    0.55
 -10   5  -1    6.37    0.31
 -10   5  -1    6.81    0.38
  10  -5   1    6.69    0.39
 -11   5  -1    9.92    0.42
 -11   5  -1   10.90    0.48
  11  -5   1    9.96    0.48
 -12   5  -1    0.20    0.21
 -12   5  -1    0.25    0.24
  12  -5   1    0.45    0.27
 -13   5  -1    0.34    0.23
 -13   5  -1    0.67    0.28
  13  -5   1    0.60    0.28
 -14   5  -1   18.91    0.71
 -14   5  -1   18.21    0.63
  14  -5   1   17.85    0.74
 -15   5  -1    4.46    0.38
 -15   5  -1    5.35    0.46
  15  -5   1    4.34    0.44
 -16   5  -1    0.38    0.30
 -16   5  -1    0.45    0.36
  16  -5   1    0.66    0.38
 -17   5  -1    0.15    0.37
 -17   5  -1   -0.15    0.33
  17  -5   1    0.20    0.38
  15   4  -1    0.69    0.34
 -15  -4   1   -0.05    0.30
 -15  -4   1    0.25    0.33
  14   4  -1    0.40    0.34
 -14  -4   1    0.71    0.30
 -14  -4   1    0.52    0.32
  13   4  -1    7.95    0.54
 -13  -4   1    7.27    0.50
 -13  -4   1    6.14    0.41
  12   4  -1    1.94    0.33
 -12  -4   1    2.23    0.30
 -12  -4   1    2.54    0.35
  11   4  -1    1.08    0.27
 -11  -4   1    0.74    0.25
 -11  -4   1    1.13    0.24
  10   4  -1    0.43    0.23
 -10  -4   1   -0.11    0.18
 -10  -4   1    0.09    0.21
   9   4  -1   18.42    0.62
  -9  -4   1   18.66    0.54
  -9  -4   1   19.71    0.65
   8   4  -1   28.93    0.76
  -8  -4   1   28.42    0.78
  -8  -4   1   27.89    0.70
   7   4  -1    4.79    0.29
   7   4  -1    5.49    0.20
  -7  -4   1    5.55    0.32
  -7  -4   1    5.36    0.26
   6   4  -1   20.54    0.56
   6   4  -1   20.73    0.45
  -6  -4   1   20.20    0.51
  -6  -4   1   19.91    0.58
   5   4  -1   63.53    1.28
   5   4  -1   64.17    1.30
   5   4  -1   63.67    1.40
  -5  -4   1   63.03    1.30
  -5  -4   1   62.98    1.40
   4   4  -1    3.24    0.21
   4   4  -1    3.12    0.11
   4   4  -1    3.11    0.17
  -4  -4   1    2.91    0.16
  -4  -4   1    3.15    0.21
   3   4  -1    5.06    0.21
   3   4  -1    4.85    0.19
   3   4  -1    4.87    0.13
  -3  -4   1    4.68    0.18
   2   4  -1    0.54    0.09
   2   4  -1    0.56    0.08
  -2  -4   1    0.50    0.08
  -2  -4   1    0.47    0.09
   1   4  -1  336.39    6.90
   1   4  -1  347.08    6.53
  -1  -4   1  350.16    6.79
  -1  -4   1  337.65    6.53
  -1  -4   1  347.73    6.84
   0   4  -1    4.26    0.18
   0   4  -1    4.36    0.16
   0  -4   1    4.43    0.14
   0  -4   1    4.28    0.16
   0  -4   1    4.54    0.16
  -1   4  -1    0.64    0.07
  -1   4  -1    0.83    0.09
   1  -4   1    1.01    0.08
   1  -4   1    0.79    0.07
   1  -4   1    1.01    0.08
  -2   4  -1    7.20    0.24
  -2   4  -1    7.97    0.22
   2  -4   1    7.70    0.24
   2  -4   1    7.51    0.20
  -3   4  -1   41.63    0.85
  -3   4  -1   41.42    0.91
   3  -4   1   40.15    0.90
   3  -4   1   41.96    0.85
   3  -4   1   41.85    0.85
  -4   4  -1    0.97    0.11
  -4   4  -1    1.21    0.07
  -4   4  -1    1.07    0.10
   4  -4   1    1.05    0.10
   4  -4   1    1.01    0.12
  -5   4  -1   32.49    0.77
  -5   4  -1   33.04    0.70
  -5   4  -1   33.46    0.73
   5  -4   1   34.18    0.72
   5  -4   1   33.12    0.78
  -6   4  -1    6.71    0.25
  -6   4  -1    7.11    0.29
  -6   4  -1    6.64    0.21
   6  -4   1    7.51    0.25
   6  -4   1    6.95    0.31
  -7   4  -1    2.47    0.16
  -7   4  -1    2.06    0.16
  -7   4  -1    2.15    0.18
   7  -4   1    3.06    0.17
   7  -4   1    2.58    0.21
  -8   4  -1    0.03    0.13
  -8   4  -1    0.14    0.09
  -8   4  -1    0.12    0.13
   8  -4   1    0.21    0.16
  -9   4  -1    4.42    0.27
  -9   4  -1    4.10    0.23
  -9   4  -1    3.64    0.26
   9  -4   1    3.96    0.30
 -10   4  -1    1.02    0.15
 -10   4  -1    0.72    0.18
 -10   4  -1    1.07    0.20
  10  -4   1    0.60    0.21
 -11   4  -1    3.01    0.29
 -11   4  -1    2.91    0.25
  11  -4   1    2.74    0.29
 -12   4  -1    1.55    0.26
 -12   4  -1    1.14    0.23
  12  -4   1    1.19    0.28
 -13   4  -1    0.39    0.22
 -13   4  -1    0.87    0.26
  13  -4   1    0.58    0.27
 -14   4  -1    1.98    0.33
 -14   4  -1    2.88    0.32
  14  -4   1    2.11    0.37
 -15   4  -1    0.71    0.27
 -15   4  -1    1.15    0.35
  15  -4   1    1.64    0.36
 -16   4  -1    1.23    0.37
 -16   4  -1    0.31    0.32
  16  -4   1    1.02    0.37
 -17   4  -1    0.30    0.32
 -17   4  -1   -0.23    0.37
  16   3  -1    1.15    0.41
 -16  -3   1    1.04    0.35
  15   3  -1   -0.30    0.34
 -15  -3   1    0.12    0.30
 -15  -3   1   -0.55    0.31
  14   3  -1    7.21    0.50
 -14  -3   1    7.58    0.52
 -14  -3   1    7.41    0.47
  13   3  -1    0.55    0.28
 -13  -3   1    1.53    0.32
 -13  -3   1    0.73    0.25
  12   3  -1    0.37    0.27
 -12  -3   1    0.67    0.27
 -12  -3   1   -0.12    0.22
  11   3  -1    1.08    0.25
 -11  -3   1    0.71    0.23
 -11  -3   1    0.77    0.22
  10   3  -1    2.68    0.28
 -10  -3   1    1.95    0.26
 -10  -3   1    2.04    0.23
   9   3  -1    6.45    0.39
  -9  -3   1    6.36    0.36
  -9  -3   1    6.67    0.32
   8   3  -1    0.15    0.11
   8   3  -1   -0.03    0.16
  -8  -3   1   -0.03    0.13
  -8  -3   1   -0.11    0.16
   7   3  -1   31.35    0.80
   7   3  -1   32.08    0.71
  -7  -3   1   32.71    0.81
  -7  -3   1   32.06    0.74
   6   3  -1    1.90    0.18
   6   3  -1    1.83    0.11
  -6  -3   1    1.54    0.17
  -6  -3   1    1.72    0.15
   5   3  -1   12.98    0.39
   5   3  -1   13.06    0.31
  -5  -3   1   12.98    0.39
  -5  -3   1   12.32    0.34
   4   3  -1    3.18    0.20
   4   3  -1    3.42    0.14
   4   3  -1    3.34    0.11
  -4  -3   1    3.57    0.21
  -4  -3   1    3.38    0.15
   3   3  -1   50.92    1.12
   3   3  -1   53.04    1.05
   3   3  -1   52.69    1.04
  -3  -3   1   53.23    1.06
  -3  -3   1   52.34    1.13
   2   3  -1   47.27    0.96
   2   3  -1   47.87    0.95
  -2  -3   1   48.19    0.96
  -2  -3   1   47.73    1.02
   1   3  -1    5.45    0.18
   1   3  -1    5.31    0.16
  -1  -3   1    5.43    0.18
  -1  -3   1    5.25    0.16
  -1  -3   1    5.26    0.13
   0   3  -1    0.68    0.06
   0   3  -1    0.84    0.08
   0  -3   1    0.71    0.06
   0  -3   1    0.77    0.06
   0  -3   1    0.68    0.07
  -1   3  -1   34.31    0.75
  -1   3  -1   34.32    0.70
   1  -3   1   34.19    0.72
   1  -3   1   33.69    0.69
   1  -3   1   35.47    0.71
  -2   3  -1    2.42    0.11
  -2   3  -1    2.36    0.12
   2  -3   1    2.45    0.09
   2  -3   1    2.36    0.11
   2  -3   1    2.35    0.12
  -3   3  -1  203.27    4.14
  -3   3  -1  208.35    4.06
   3  -3   1  204.01    4.09
  -4   3  -1   -0.02    0.05
  -4   3  -1    0.04    0.07
  -4   3  -1    0.08    0.07
   4  -3   1    0.17    0.08
   4  -3   1   -0.01    0.06
  -5   3  -1   16.53    0.40
  -5   3  -1   16.01    0.38
  -5   3  -1   15.96    0.43
   5  -3   1   16.19    0.45
   5  -3   1   16.17    0.39
  -6   3  -1   18.57    0.45
  -6   3  -1   18.02    0.45
  -6   3  -1   18.84    0.49
   6  -3   1   18.20    0.45
   6  -3   1   19.08    0.51
  -7   3  -1   78.03    1.57
  -7   3  -1   75.76    1.66
  -7   3  -1   75.35    1.60
   7  -3   1   77.97    1.55
   7  -3   1   77.12    1.67
  -8   3  -1    9.57    0.35
  -8   3  -1    8.51    0.31
  -8   3  -1    9.05    0.33
   8  -3   1    9.31    0.38
  -9   3  -1   29.23    0.71
  -9   3  -1   29.65    0.72
  -9   3  -1   29.39    0.76
   9  -3   1   29.54    0.78
 -10   3  -1    7.16    0.34
 -10   3  -1    6.78    0.33
 -10   3  -1    6.58    0.35
  10  -3   1    8.34    0.39
 -11   3  -1   21.66    0.62
 -11   3  -1   23.25    0.69
 -11   3  -1   21.09    0.62
  11  -3   1   22.38    0.70
 -12   3  -1    9.81    0.43
 -12   3  -1    9.85    0.45
  12  -3   1    9.39    0.49
 -13   3  -1    0.80    0.28
 -13   3  -1    0.78    0.23
  13  -3   1    1.00    0.29
 -14   3  -1    5.52    0.43
 -14   3  -1    5.53    0.39
  14  -3   1    5.45    0.43
 -15   3  -1    6.26    0.46
 -15   3  -1    7.53    0.47
  15  -3   1    6.71    0.49
 -16   3  -1    0.58    0.35
 -16   3  -1    0.00    0.31
 -17   3  -1    2.63    0.44
 -17   3  -1    2.72    0.41
  16   2  -1    7.08    0.55
 -16  -2   1    6.66    0.47
  15   2  -1   -0.08    0.33
 -15  -2   1    0.62    0.29
 -15  -2   1    0.47    0.33
  14   2  -1    0.66    0.32
 -14  -2   1    0.58    0.28
 -14  -2   1    0.64    0.30
  13   2  -1    8.05    0.52
 -13  -2   1    6.92    0.42
 -13  -2   1    7.80    0.50
  12   2  -1   25.91    0.82
 -12  -2   1   27.95    0.84
 -12  -2   1   27.00    0.75
  11   2  -1    3.99    0.33
 -11  -2   1    4.23    0.30
 -11  -2   1    4.38    0.34
  10   2  -1    0.27    0.19
  10   2  -1    0.00    0.14
 -10  -2   1    0.44    0.20
 -10  -2   1    0.16    0.18
 -10  -2   1    0.11    0.17
   9   2  -1    2.83    0.20
   9   2  -1    2.76    0.25
  -9  -2   1    2.70    0.26
  -9  -2   1    2.83    0.22
  -9  -2   1    2.04    0.22
   8   2  -1   37.31    0.83
  -8  -2   1   35.72    0.90
  -8  -2   1   35.63    0.90
  -8  -2   1   37.46    0.83
   7   2  -1   23.77    0.56
  -7  -2   1   22.88    0.57
  -7  -2   1   22.86    0.62
  -7  -2   1   23.64    0.62
   6   2  -1    5.13    0.19
  -6  -2   1    4.94    0.24
  -6  -2   1    5.37    0.26
  -6  -2   1    4.70    0.21
   5   2  -1    7.74    0.29
   5   2  -1    7.77    0.22
  -5  -2   1    7.79    0.28
  -5  -2   1    8.19    0.24
  -5  -2   1    7.94    0.28
   4   2  -1   32.50    0.72
   4   2  -1   31.98    0.66
  -4  -2   1   31.46    0.67
  -4  -2   1   30.61    0.72
   3   2  -1    7.56    0.18
  -3  -2   1    7.38    0.20
  -3  -2   1    7.38    0.23
   2   2  -1   19.25    0.45
   2   2  -1   19.76    0.39
  -2  -2   1   19.08    0.45
  -2  -2   1   19.74    0.41
   1   2  -1    7.36    0.18
  -1  -2   1    7.58    0.18
  -1  -2   1    7.39    0.16
  -1  -2   1    7.55    0.20
   0   2  -1   19.95    0.44
   0   2  -1   20.01    0.41
   0  -2   1   20.28    0.41
   0  -2   1   19.69    0.41
  -1   2  -1   11.52    0.25
  -1   2  -1   11.17    0.27
   1  -2   1   11.16    0.25
   1  -2   1   10.89    0.25
   1  -2   1   10.87    0.26
  -2   2  -1    0.91    0.06
  -2   2  -1    0.90    0.06
  -2   2  -1    0.83    0.06
   2  -2   1    0.83    0.06
   2  -2   1    0.99    0.07
  -3   2  -1  127.98    2.57
  -3   2  -1  131.37    2.44
  -3   2  -1  123.61    2.52
   3  -2   1  123.57    2.44
  -4   2  -1    0.05    0.06
  -4   2  -1    0.10    0.05
  -4   2  -1    0.05    0.06
   4  -2   1   -0.05    0.05
   4  -2   1   -0.04    0.08
  -5   2  -1   14.30    0.38
  -5   2  -1   14.15    0.36
  -5   2  -1   13.76    0.35
   5  -2   1   13.52    0.39
   5  -2   1   14.65    0.35
  -6   2  -1    0.08    0.10
  -6   2  -1    0.20    0.09
  -6   2  -1   -0.06    0.08
   6  -2   1   -0.03    0.10
   6  -2   1    0.05    0.08
  -7   2  -1    0.51    0.14
  -7   2  -1    0.21    0.11
  -7   2  -1    0.56    0.11
   7  -2   1    0.35    0.14
   7  -2   1    0.33    0.10
  -8   2  -1    5.65    0.28
  -8   2  -1    6.28    0.28
  -8   2  -1    5.88    0.25
   8  -2   1    5.53    0.31
  -9   2  -1    3.27    0.22
  -9   2  -1    3.13    0.25
  -9   2  -1    3.12    0.22
   9  -2   1    3.22    0.26
 -10   2  -1    0.69    0.20
 -10   2  -1    0.59    0.16
 -10   2  -1    0.50    0.16
  10  -2   1    0.33    0.20
 -11   2  -1    0.27    0.17
 -11   2  -1   -0.03    0.20
 -11   2  -1   -0.11    0.16
  11  -2   1    0.33    0.21
 -12   2  -1    0.79    0.25
 -12   2  -1    0.73    0.20
 -12   2  -1    0.98    0.22
  12  -2   1    0.89    0.24
 -13   2  -1    2.47    0.29
 -13   2  -1    3.61    0.35
  13  -2   1    3.09    0.34
 -14   2  -1    4.58    0.41
 -14   2  -1    5.28    0.38
  14  -2   1    5.51    0.42
 -15   2  -1   -0.41    0.30
 -15   2  -1   -0.06    0.28
 -16   2  -1    9.70    0.55
 -17   2  -1    0.53    0.32
 -17   2  -1    0.25    0.38
  16   1  -1    0.22    0.36
 -16  -1   1    0.36    0.30
  15   1  -1    0.03    0.33
 -15  -1   1    0.63    0.29
  14   1  -1    2.71    0.38
 -14  -1   1    2.75    0.32
 -14  -1   1    2.02    0.33
 -13  -1   1    0.18    0.24
 -13  -1   1   -0.51    0.22
 -13  -1   1    0.11    0.28
 -12  -1   1    0.33    0.21
 -12  -1   1    0.22    0.22
 -12  -1   1    0.02    0.25
  11   1  -1    2.42    0.24
 -11  -1   1    2.54    0.28
 -11  -1   1    2.72    0.28
 -11  -1   1    2.32    0.23
  10   1  -1   25.74    0.68
 -10  -1   1   26.58    0.74
 -10  -1   1   25.26    0.67
 -10  -1   1   26.13    0.73
   9   1  -1    1.98    0.19
  -9  -1   1    1.69    0.22
  -9  -1   1    1.81    0.21
  -9  -1   1    1.86    0.19
   8   1  -1    0.30    0.12
  -8  -1   1    0.36    0.13
  -8  -1   1    0.64    0.14
  -8  -1   1    0.68    0.16
   7   1  -1   98.02    2.00
  -7  -1   1   97.73    2.05
  -7  -1   1   94.66    1.94
  -7  -1   1   98.24    2.07
   6   1  -1   12.95    0.35
  -6  -1   1   11.99    0.38
  -6  -1   1   12.17    0.33
  -6  -1   1   12.49    0.38
   5   1  -1   44.14    0.95
  -5  -1   1   44.82    0.93
  -5  -1   1   45.46    1.00
  -5  -1   1   46.65    0.99
   4   1  -1    8.71    0.23
  -4  -1   1    8.99    0.23
  -4  -1   1    8.89    0.27
  -4  -1   1    8.56    0.26
   3   1  -1   36.09    0.74
  -3  -1   1   36.14    0.78
  -3  -1   1   36.38    0.72
  -3  -1   1   35.41    0.77
   2   1  -1    5.47    0.14
  -2  -1   1    5.62    0.14
  -2  -1   1    5.81    0.17
   1   1  -1   18.52    0.40
  -1  -1   1   18.47    0.37
  -1   1  -1   12.28    0.27
  -1   1  -1   11.90    0.26
   1  -1   1   12.67    0.26
   1  -1   1   12.05    0.27
   1  -1   1   12.65    0.26
  -2   1  -1    1.21    0.07
  -2   1  -1    1.15    0.06
  -2   1  -1    1.22    0.07
   2  -1   1    1.20    0.07
   2  -1   1    0.94    0.07
  -3   1  -1  362.23    6.68
  -3   1  -1  353.96    7.04
  -3   1  -1  346.83    7.08
   3  -1   1  344.97    6.68
   3  -1   1  353.31    6.94
  -4   1  -1   19.12    0.45
  -4   1  -1   19.48    0.46
  -4   1  -1   20.20    0.44
   4  -1   1   18.53    0.46
   4  -1   1   19.93    0.43
  -5   1  -1    0.10    0.07
  -5   1  -1    0.29    0.08
  -5   1  -1    0.12    0.07
   5  -1   1    0.17    0.09
   5  -1   1    0.18    0.07
  -6   1  -1    4.32    0.21
  -6   1  -1    4.72    0.19
  -6   1  -1    4.54    0.22
   6  -1   1    4.75    0.24
   6  -1   1    4.58    0.19
  -7   1  -1   99.41    2.07
  -7   1  -1   99.03    1.96
  -7   1  -1   97.87    2.05
   7  -1   1   97.37    2.05
   7  -1   1   95.86    1.94
  -8   1  -1    0.62    0.14
  -8   1  -1    0.72    0.15
  -8   1  -1    0.51    0.13
   8  -1   1    0.84    0.16
  -9   1  -1    4.06    0.27
  -9   1  -1    4.41    0.29
  -9   1  -1    3.93    0.26
   9  -1   1    4.53    0.28
 -10   1  -1   18.90    0.59
 -10   1  -1   18.08    0.53
 -10   1  -1   18.21    0.57
  10  -1   1   20.44    0.60
 -11   1  -1   14.42    0.47
 -11   1  -1   13.70    0.51
 -11   1  -1   14.15    0.53
  11  -1   1   14.73    0.53
 -12   1  -1    5.33    0.35
 -12   1  -1    4.44    0.31
 -12   1  -1    5.16    0.37
  12  -1   1    5.66    0.38
 -13   1  -1    7.97    0.40
 -13   1  -1    7.58    0.46
 -13   1  -1    6.82    0.44
  13  -1   1    6.77    0.44
 -14   1  -1   -0.04    0.29
 -14   1  -1    0.37    0.24
 -15   1  -1    0.20    0.27
 -15   1  -1    0.07    0.32
 -16   1  -1    4.17    0.46
 -16   1  -1    4.03    0.39
 -17   1  -1   -0.33    0.30
 -17   1  -1   -0.37    0.37
  17  -1   1   -0.11    0.37
  17   0  -1    1.11    0.42
 -17   0   1    1.47    0.36
  16   0  -1    9.63    0.62
 -16   0   1    7.94    0.48
 -15   0   1    2.81    0.33
 -15   0   1    2.27    0.39
 -14   0   1    1.04    0.27
 -14   0   1    0.88    0.30
 -13   0   1    4.20    0.35
 -13   0   1    4.35    0.37
 -13   0   1    4.28    0.33
  12   0  -1    4.47    0.32
 -12   0   1    3.70    0.29
 -12   0   1    4.07    0.34
 -12   0   1    3.88    0.32
  11   0  -1    0.52    0.19
 -11   0   1    0.22    0.22
 -11   0   1    0.57    0.18
 -11   0   1    0.59    0.19
  10   0  -1   12.08    0.43
 -10   0   1   10.81    0.41
 -10   0   1   11.76    0.45
 -10   0   1   11.41    0.40
   9   0  -1    5.38    0.28
  -9   0   1    4.96    0.27
  -9   0   1    5.40    0.30
  -9   0   1    4.65    0.29
   8   0  -1   11.43    0.37
  -8   0   1   10.31    0.34
  -8   0   1   11.57    0.39
  -8   0   1   10.38    0.36
   7   0  -1  130.89    2.66
  -7   0   1  130.74    2.68
  -7   0   1  129.74    2.56
  -7   0   1  130.18    2.72
   6   0  -1    9.42    0.30
  -6   0   1    9.74    0.28
  -6   0   1    9.94    0.31
  -6   0   1    9.41    0.33
   5   0  -1   97.63    1.99
  -5   0   1   96.41    2.00
  -5   0   1   98.69    1.91
  -5   0   1   97.69    2.03
   4   0  -1    3.40    0.15
  -4   0   1    3.76    0.13
  -4   0   1    3.53    0.17
  -4   0   1    3.62    0.15
   3   0  -1  101.34    2.02
  -3   0   1  101.89    1.94
  -3   0   1  100.52    2.06
  -3   0   1  101.49    1.94
  -3   0   1  100.07    2.04
   2   0  -1    0.11    0.03
  -2   0   1    0.09    0.04
  -2   0   1    0.14    0.04
  -2   0   1    0.11    0.03
  -2   0   1    0.17    0.03
  -1   0  -1   73.86    1.49
  -1   0  -1   72.82    1.49
  -1   0  -1   74.23    1.42
   1   0   1   75.84    1.42
   1   0   1   75.11    1.48
  -2   0  -1    0.10    0.04
  -2   0  -1    0.11    0.04
  -2   0  -1    0.13    0.04
   2   0   1    0.07    0.03
   2   0   1    0.15    0.04
  -3   0  -1   41.69    0.88
  -3   0  -1   42.46    0.84
  -3   0  -1   42.42    0.88
   3   0   1   41.82    0.88
   3   0   1   41.16    0.84
  -4   0  -1   21.85    0.51
  -4   0  -1   22.47    0.49
  -4   0  -1   22.57    0.51
   4   0   1   22.27    0.51
   4   0   1   21.59    0.48
  -5   0  -1    2.27    0.15
  -5   0  -1    2.14    0.13
  -5   0  -1    2.47    0.17
   5   0   1    2.50    0.13
   5   0   1    2.40    0.16
  -6   0  -1    5.20    0.22
  -6   0  -1    4.86    0.21
  -6   0  -1    5.28    0.24
   6   0   1    4.60    0.21
   6   0   1    5.00    0.20
  -7   0  -1   11.50    0.36
  -7   0  -1   11.15    0.33
  -7   0  -1   11.16    0.38
   7   0   1   11.61    0.36
   7   0   1   11.15    0.33
  -8   0  -1   20.98    0.56
  -8   0  -1   20.97    0.53
  -8   0  -1   20.26    0.57
   8   0   1   20.07    0.56
  -9   0  -1   18.61    0.54
  -9   0  -1   17.93    0.50
  -9   0  -1   17.54    0.55
   9   0   1   18.16    0.54
 -10   0  -1   12.85    0.43
 -10   0  -1   14.10    0.49
 -10   0  -1   13.31    0.50
  10   0   1   14.00    0.47
 -11   0  -1    0.65    0.19
 -11   0  -1    0.66    0.23
 -11   0  -1    0.47    0.20
  11   0   1    0.65    0.20
 -12   0  -1   18.64    0.64
 -12   0  -1   17.99    0.57
 -12   0  -1   17.69    0.63
  12   0   1   17.58    0.60
 -13   0  -1    3.57    0.32
 -13   0  -1    3.24    0.35
 -13   0  -1    3.34    0.33
 -14   0  -1    4.79    0.42
 -14   0  -1    5.05    0.37
 -15   0  -1    1.28    0.36
 -15   0  -1    0.84    0.29
  15   0   1    0.22    0.33
 -16   0  -1    2.91    0.39
  16   0   1    3.05    0.42
  17   0   1    0.03    0.38
 -17   1   1    0.46    0.40
 -17   1   1    0.02    0.31
 -16   1   1    0.82    0.39
 -16   1   1    0.81    0.29
 -15   1   1    0.39    0.33
 -15   1   1    0.47    0.28
 -14   1   1    9.99    0.46
 -14   1   1   10.20    0.52
  13  -1  -1   14.97    0.57
 -13   1   1   14.46    0.57
 -13   1   1   14.11    0.52
  12  -1  -1    0.76    0.23
 -12   1   1    0.57    0.25
 -12   1   1    0.51    0.20
 -12   1   1    0.46    0.20
  11  -1  -1   21.82    0.65
 -11   1   1   20.84    0.60
 -11   1   1   21.99    0.63
 -11   1   1   21.57    0.68
  10  -1  -1   25.95    0.71
 -10   1   1   26.57    0.74
 -10   1   1   26.45    0.70
 -10   1   1   25.26    0.65
   9  -1  -1   83.07    1.81
  -9   1   1   82.89    1.85
  -9   1   1   85.57    1.80
  -9   1   1   83.55    1.72
   8  -1  -1    1.45    0.16
  -8   1   1    1.24    0.14
  -8   1   1    1.34    0.15
  -8   1   1    1.09    0.17
   7  -1  -1    0.41    0.12
  -7   1   1    0.42    0.10
  -7   1   1    0.55    0.13
  -7   1   1    0.52    0.11
   6  -1  -1   49.71    1.07
  -6   1   1   48.29    1.00
  -6   1   1   48.21    1.08
  -6   1   1   48.68    1.05
   5  -1  -1  269.22    5.33
  -5   1   1  267.71    5.34
  -5   1   1  269.45    5.42
  -5   1   1  267.83    5.12
   4  -1  -1    0.81    0.08
  -4   1   1    1.01    0.07
  -4   1   1    0.89    0.09
  -4   1   1    1.03    0.08
   3  -1  -1  240.31    4.68
  -3   1   1  236.79    4.76
  -3   1   1  235.04    4.50
  -3   1   1  227.87    4.72
  -3   1   1  243.88    4.50
   2  -1  -1   13.31    0.30
  -2   1   1   13.80    0.28
  -2   1   1   13.35    0.28
  -2   1   1   13.39    0.31
  -2   1   1   13.58    0.28
   1  -1  -1  270.50    5.27
   1  -1  -1  270.17    5.26
  -1   1   1  262.08    5.07
  -1   1   1  260.39    5.05
   0  -1  -1    0.26    0.03
   0  -1  -1    0.18    0.02
   0   1   1    0.26    0.03
   1   1   1    5.17    0.14
   1   1   1    5.19    0.14
   1   1   1    5.33    0.14
  -2  -1  -1    1.38    0.08
  -2  -1  -1    1.42    0.10
   2   1   1    1.37    0.07
   2   1   1    1.35    0.08
   2   1   1    1.28    0.07
  -3  -1  -1  167.36    3.18
  -3  -1  -1  168.93    3.34
  -3  -1  -1  163.41    3.33
   3   1   1  165.64    3.17
   3   1   1  164.19    3.29
  -4  -1  -1    4.53    0.19
  -4  -1  -1    4.87    0.18
  -4  -1  -1    4.74    0.17
   4   1   1    4.72    0.17
   4   1   1    4.49    0.16
  -5  -1  -1   -0.02    0.08
  -5  -1  -1    0.08    0.07
  -5  -1  -1   -0.02    0.08
   5   1   1    0.05    0.07
   5   1   1    0.05    0.07
  -6  -1  -1    8.14    0.31
  -6  -1  -1    8.73    0.27
  -6  -1  -1    9.06    0.30
   6   1   1    8.57    0.28
  -7  -1  -1    6.69    0.32
  -7  -1  -1    6.76    0.28
  -7  -1  -1    6.77    0.26
   7   1   1    7.33    0.27
  -8  -1  -1    5.58    0.33
  -8  -1  -1    5.18    0.27
  -8  -1  -1    5.61    0.28
   8   1   1    6.06    0.27
  -9  -1  -1    4.56    0.29
  -9  -1  -1    4.15    0.25
  -9  -1  -1    3.95    0.27
   9   1   1    4.84    0.27
 -10  -1  -1    2.97    0.27
 -10  -1  -1    4.28    0.30
 -10  -1  -1    4.36    0.27
  10   1   1    3.69    0.26
 -11  -1  -1    0.76    0.22
 -11  -1  -1    0.36    0.18
 -11  -1  -1    0.55    0.23
  11   1   1    0.44    0.19
 -12  -1  -1    4.74    0.32
 -12  -1  -1    5.51    0.39
 -12  -1  -1    5.31    0.37
 -13  -1  -1    0.44    0.26
 -13  -1  -1    0.02    0.25
 -13  -1  -1    0.34    0.23
  13   1   1    0.40    0.27
 -14  -1  -1    3.61    0.40
 -14  -1  -1    3.39    0.36
  14   1   1    3.74    0.39
 -15  -1  -1    0.72    0.31
  15   1   1    0.61    0.33
 -16  -1  -1    3.03    0.40
  16   1   1    2.76    0.43
 -17   2   1    2.75    0.39
 -17   2   1    3.21    0.46
 -16   2   1    3.18    0.43
 -16   2   1    2.05    0.33
 -15   2   1    3.06    0.33
 -15   2   1    3.51    0.41
  14  -2  -1    2.33    0.33
 -14   2   1    2.65    0.29
 -14   2   1    2.27    0.34
  13  -2  -1    0.44    0.25
 -13   2   1    0.56    0.28
 -13   2   1    0.76    0.22
  12  -2  -1    0.70    0.24
 -12   2   1    0.30    0.19
 -12   2   1    0.25    0.23
  11  -2  -1   22.58    0.67
 -11   2   1   22.91    0.62
 -11   2   1   21.79    0.62
 -11   2   1   21.45    0.67
  10  -2  -1    6.93    0.37
 -10   2   1    6.77    0.35
 -10   2   1    7.08    0.30
 -10   2   1    6.40    0.32
   9  -2  -1    0.10    0.16
  -9   2   1    0.27    0.12
  -9   2   1    0.05    0.15
  -9   2   1   -0.22    0.12
   8  -2  -1    0.87    0.16
  -8   2   1    0.59    0.11
  -8   2   1    0.27    0.15
  -8   2   1    0.89    0.13
   7  -2  -1   12.31    0.40
  -7   2   1   12.57    0.41
  -7   2   1   13.28    0.35
  -7   2   1   12.40    0.35
   6  -2  -1    3.64    0.20
  -6   2   1    4.08    0.18
  -6   2   1    3.87    0.17
  -6   2   1    3.98    0.21
   5  -2  -1    4.27    0.20
  -5   2   1    4.30    0.20
  -5   2   1    4.25    0.17
  -5   2   1    4.57    0.16
   4  -2  -1    0.33    0.08
  -4   2   1    0.36    0.08
  -4   2   1    0.42    0.06
  -4   2   1    0.32    0.05
   3  -2  -1  359.40    7.05
  -3   2   1  363.62    6.78
  -3   2   1  357.64    7.10
  -3   2   1  351.84    7.16
   2  -2  -1    0.15    0.04
  -2   2   1    0.17    0.04
  -2   2   1    0.11    0.05
   1  -2  -1   36.71    0.75
   1  -2  -1   37.08    0.76
  -1   2   1   38.38    0.73
  -1   2   1   37.81    0.77
  -1   2   1   35.85    0.78
   0  -2  -1    1.87    0.08
   0  -2  -1    1.90    0.08
   0   2   1    1.83    0.08
   0   2   1    1.87    0.09
   0   2   1    1.84    0.07
  -1  -2  -1  876.56   17.00
  -1  -2  -1  892.28   17.79
   1   2   1  892.95   17.01
   1   2   1  905.57   17.55
   1   2   1  893.72   17.93
  -2  -2  -1   10.45    0.28
  -2  -2  -1   10.84    0.26
   2   2   1   10.82    0.27
   2   2   1   10.66    0.25
   2   2   1   10.58    0.26
  -3  -2  -1    1.57    0.10
  -3  -2  -1    1.72    0.12
   3   2   1    1.57    0.11
   3   2   1    1.63    0.10
   3   2   1    1.75    0.10
  -4  -2  -1    1.41    0.13
  -4  -2  -1    1.37    0.11
   4   2   1    1.50    0.10
   4   2   1    1.34    0.11
   4   2   1    1.60    0.11
  -5  -2  -1   86.80    1.76
  -5  -2  -1   89.75    1.87
   5   2   1   88.77    1.85
   5   2   1   88.70    1.75
   5   2   1   87.98    1.80
  -6  -2  -1   53.25    1.19
  -6  -2  -1   53.13    1.11
   6   2   1   52.77    1.10
   6   2   1   53.66    1.16
   6   2   1   51.41    1.12
  -7  -2  -1    5.71    0.26
  -7  -2  -1    5.89    0.28
  -7  -2  -1    5.88    0.30
   7   2   1    5.81    0.23
   7   2   1    6.12    0.27
   7   2   1    5.51    0.24
  -8  -2  -1    3.82    0.23
  -8  -2  -1    3.87    0.28
  -8  -2  -1    4.30    0.26
   8   2   1    3.54    0.22
   8   2   1    4.08    0.26
  -9  -2  -1   32.65    0.80
  -9  -2  -1   34.42    0.88
   9   2   1   33.33    0.84
   9   2   1   32.61    0.79
 -10  -2  -1   19.64    0.65
 -10  -2  -1   19.76    0.57
  10   2   1   19.12    0.62
  10   2   1   18.46    0.54
 -11  -2  -1    0.48    0.21
 -11  -2  -1    0.25    0.23
  11   2   1    0.14    0.22
 -12  -2  -1    0.06    0.23
 -12  -2  -1    0.22    0.21
  12   2   1   -0.06    0.24
 -13  -2  -1    0.14    0.24
 -13  -2  -1   -0.15    0.24
  13   2   1   -0.25    0.27
 -14  -2  -1   11.74    0.53
 -14  -2  -1   12.38    0.64
  14   2   1   12.79    0.64
 -15  -2  -1    1.55    0.37
 -15  -2  -1    2.08    0.35
  15   2   1    2.32    0.39
 -16  -2  -1    0.37    0.31
  16   2   1    0.00    0.36
 -17   3   1   10.81    0.58
 -17   3   1    9.46    0.64
 -16   3   1    3.99    0.39
 -16   3   1    3.77    0.45
  15  -3  -1    1.40    0.35
 -15   3   1    1.25    0.35
 -15   3   1    0.97    0.27
  14  -3  -1   10.82    0.56
 -14   3   1   11.40    0.54
 -14   3   1   11.07    0.49
  13  -3  -1   15.46    0.62
 -13   3   1   15.41    0.60
 -13   3   1   15.17    0.54
  12  -3  -1    5.40    0.38
 -12   3   1    5.57    0.37
 -12   3   1    4.97    0.31
  11  -3  -1    0.14    0.21
 -11   3   1    0.49    0.22
 -11   3   1    0.23    0.16
  10  -3  -1    5.51    0.34
 -10   3   1    5.01    0.27
 -10   3   1    4.94    0.33
 -10   3   1    4.95    0.26
   9  -3  -1   63.18    1.44
  -9   3   1   63.19    1.45
  -9   3   1   63.59    1.35
  -9   3   1   65.07    1.36
   8  -3  -1   27.59    0.71
  -8   3   1   27.63    0.65
  -8   3   1   26.88    0.71
  -8   3   1   27.72    0.64
   7  -3  -1   36.50    0.86
  -7   3   1   36.77    0.79
  -7   3   1   36.11    0.79
  -7   3   1   35.92    0.87
   6  -3  -1    0.00    0.11
  -6   3   1    0.20    0.11
  -6   3   1    0.07    0.08
  -6   3   1    0.06    0.06
   5  -3  -1  503.23   10.00
  -5   3   1  494.68   10.07
  -5   3   1  510.43   10.16
  -5   3   1  520.46    9.62
   4  -3  -1    0.25    0.08
  -4   3   1    0.31    0.03
  -4   3   1    0.31    0.07
  -4   3   1    0.28    0.08
   3  -3  -1   70.01    1.43
  -3   3   1   68.35    1.46
  -3   3   1   71.19    1.37
   2  -3  -1    2.78    0.11
   2  -3  -1    2.79    0.08
   2  -3  -1    2.88    0.12
  -2   3   1    2.70    0.11
   1  -3  -1   24.73    0.52
   1  -3  -1   25.05    0.51
   1  -3  -1   24.51    0.53
  -1   3   1   24.32    0.51
  -1   3   1   24.33    0.55
   0  -3  -1    5.45    0.15
   0  -3  -1    5.11    0.16
   0   3   1    5.16    0.15
   0   3   1    4.95    0.18
   0   3   1    5.34    0.15
  -1  -3  -1  112.70    2.15
  -1  -3  -1  109.76    2.25
   1   3   1  107.22    2.26
   1   3   1  112.60    2.15
   1   3   1  113.85    2.21
  -2  -3  -1   94.60    1.85
  -2  -3  -1   95.47    1.96
   2   3   1   97.23    1.86
   2   3   1   94.52    1.89
   2   3   1   93.80    1.95
  -3  -3  -1    5.52    0.22
  -3  -3  -1    5.59    0.19
   3   3   1    5.45    0.17
   3   3   1    5.78    0.19
   3   3   1    5.56    0.21
  -4  -3  -1    6.95    0.23
   4   3   1    7.05    0.20
   4   3   1    6.88    0.25
   4   3   1    7.27    0.24
  -5  -3  -1    0.21    0.11
  -5  -3  -1    0.21    0.09
   5   3   1    0.31    0.11
   5   3   1    0.22    0.09
   5   3   1    0.31    0.08
  -6  -3  -1    0.39    0.12
  -6  -3  -1    0.14    0.13
   6   3   1    0.27    0.12
   6   3   1    0.32    0.09
   6   3   1    0.39    0.10
  -7  -3  -1    0.11    0.14
  -7  -3  -1    0.35    0.13
   7   3   1    0.15    0.10
   7   3   1    0.15    0.14
  -8  -3  -1   32.41    0.87
  -8  -3  -1   32.37    0.78
   8   3   1   33.24    0.75
   8   3   1   31.79    0.82
  -9  -3  -1    6.63    0.41
  -9  -3  -1    5.64    0.30
   9   3   1    5.74    0.34
   9   3   1    5.90    0.28
 -10  -3  -1    7.15    0.37
 -10  -3  -1    7.92    0.45
  10   3   1    7.42    0.42
 -11  -3  -1    1.97    0.25
 -11  -3  -1    2.03    0.29
  11   3   1    1.76    0.26
 -12  -3  -1    5.91    0.37
 -12  -3  -1    7.27    0.47
  12   3   1    6.33    0.41
 -13  -3  -1    0.03    0.26
 -13  -3  -1    0.01    0.24
  13   3   1   -0.21    0.27
 -14  -3  -1    0.60    0.34
 -14  -3  -1    1.02    0.31
  14   3   1    0.72    0.33
 -15  -3  -1    0.10    0.31
 -15  -3  -1    0.14    0.35
  15   3   1    0.92    0.36
  16   3   1    2.70    0.44
 -17   4   1   -0.33    0.37
 -17   4   1    0.44    0.32
  16  -4  -1    2.80    0.42
 -16   4   1    2.98    0.42
 -16   4   1    2.75    0.35
  15  -4  -1    2.74    0.39
 -15   4   1    2.69    0.32
 -15   4   1    2.18    0.38
  14  -4  -1    0.97    0.30
 -14   4   1    1.13    0.27
 -14   4   1    1.33    0.33
  13  -4  -1    1.53    0.31
 -13   4   1    1.57    0.29
 -13   4   1    1.23    0.24
  12  -4  -1   10.84    0.52
 -12   4   1   10.56    0.48
 -12   4   1   10.66    0.42
  11  -4  -1   24.10    0.74
 -11   4   1   24.68    0.73
 -11   4   1   25.59    0.67
  10  -4  -1   -0.26    0.17
 -10   4   1    0.11    0.20
 -10   4   1    0.15    0.16
   9  -4  -1    3.35    0.27
  -9   4   1    3.54    0.23
  -9   4   1    3.73    0.27
  -9   4   1    4.03    0.20
   8  -4  -1   13.09    0.44
  -8   4   1   13.58    0.39
  -8   4   1   12.82    0.44
  -8   4   1   13.65    0.34
   7  -4  -1   11.32    0.41
  -7   4   1   11.46    0.33
  -7   4   1   11.23    0.40
  -7   4   1   11.98    0.29
   6  -4  -1    0.07    0.11
  -6   4   1    0.10    0.11
  -6   4   1   -0.03    0.08
  -6   4   1    0.07    0.04
   5  -4  -1   30.51    0.71
  -5   4   1   30.06    0.72
  -5   4   1   29.10    0.65
   4  -4  -1    1.01    0.11
  -4   4   1    1.23    0.12
  -4   4   1    1.36    0.10
   3  -4  -1   69.28    1.39
   3  -4  -1   70.65    1.46
  -3   4   1   71.73    1.39
   2  -4  -1    6.81    0.17
   2  -4  -1    6.77    0.21
   2  -4  -1    6.69    0.19
  -2   4   1    6.94    0.23
  -2   4   1    6.91    0.20
   1  -4  -1    0.19    0.05
   1  -4  -1    0.12    0.05
   1  -4  -1    0.20    0.06
  -1   4   1    0.17    0.06
  -1   4   1    0.13    0.07
   0  -4  -1   23.73    0.54
   0  -4  -1   24.15    0.51
   0   4   1   23.86    0.57
   0   4   1   24.14    0.52
   0   4   1   23.79    0.52
  -1  -4  -1   39.69    0.80
   1   4   1   39.09    0.80
   1   4   1   37.40    0.80
   1   4   1   38.29    0.85
  -2  -4  -1    0.23    0.08
  -2  -4  -1    0.18    0.07
   2   4   1    0.47    0.09
   2   4   1    0.18    0.06
   2   4   1    0.40    0.08
  -3  -4  -1    0.38    0.09
  -3  -4  -1    0.30    0.10
   3   4   1    0.40    0.06
   3   4   1    0.42    0.08
   3   4   1    0.34    0.10
  -4  -4  -1    2.64    0.16
  -4  -4  -1    2.68    0.19
   4   4   1    2.04    0.14
   4   4   1    2.42    0.16
   4   4   1    2.48    0.13
  -5  -4  -1   26.50    0.61
  -5  -4  -1   25.25    0.67
   5   4   1   25.69    0.65
   5   4   1   26.72    0.61
   5   4   1   26.05    0.58
  -6  -4  -1   21.58    0.61
  -6  -4  -1   20.03    0.53
   6   4   1   21.89    0.53
   6   4   1   21.19    0.58
   6   4   1   21.79    0.50
  -7  -4  -1    0.41    0.15
  -7  -4  -1    0.64    0.17
   7   4   1    0.25    0.15
   7   4   1    0.41    0.11
  -8  -4  -1    0.29    0.15
  -8  -4  -1    0.23    0.20
   8   4   1    0.47    0.17
   8   4   1    0.67    0.13
  -9  -4  -1    6.41    0.40
  -9  -4  -1    7.10    0.35
   9   4   1    6.70    0.39
 -10  -4  -1    6.95    0.35
 -10  -4  -1    6.67    0.42
  10   4   1    6.90    0.39
 -11  -4  -1    0.57    0.26
 -11  -4  -1    0.73    0.23
  11   4   1    1.35    0.27
 -12  -4  -1   -0.04    0.26
 -12  -4  -1    0.15    0.23
  12   4   1    0.00    0.24
 -13  -4  -1    7.06    0.43
 -13  -4  -1    7.41    0.50
  13   4   1    7.39    0.48
 -14  -4  -1    2.52    0.34
 -14  -4  -1    3.34    0.43
  14   4   1    3.17    0.40
 -15  -4  -1    0.26    0.36
  15   4   1    0.58    0.36
 -17   5   1    4.91    0.42
 -17   5   1    4.48    0.49
  16  -5  -1    8.49    0.59
 -16   5   1    7.32    0.46
 -16   5   1    7.59    0.55
  15  -5  -1    0.42    0.33
 -15   5   1    0.48    0.31
 -15   5   1    1.04    0.29
  14  -5  -1    0.34    0.28
 -14   5   1    0.03    0.29
 -14   5   1    0.33    0.23
  13  -5  -1   21.42    0.75
 -13   5   1   21.15    0.73
 -13   5   1   19.22    0.62
  12  -5  -1   11.42    0.55
 -12   5   1   11.37    0.45
 -12   5   1   11.06    0.50
  11  -5  -1    3.76    0.33
 -11   5   1    3.78    0.27
 -11   5   1    3.83    0.33
  10  -5  -1    5.11    0.35
 -10   5   1    3.75    0.30
 -10   5   1    4.60    0.29
   9  -5  -1   10.29    0.43
  -9   5   1   10.81    0.37
  -9   5   1   10.11    0.41
   8  -5  -1    0.18    0.16
  -8   5   1    0.42    0.16
  -8   5   1    0.38    0.13
   7  -5  -1   95.45    2.07
  -7   5   1   96.26    2.09
  -7   5   1  101.11    1.96
   6  -5  -1    0.77    0.14
  -6   5   1    0.90    0.12
  -6   5   1    0.88    0.15
   5  -5  -1  149.58    3.06
  -5   5   1  152.51    2.92
  -5   5   1  148.67    3.10
   4  -5  -1    4.58    0.18
   4  -5  -1    4.24    0.21
  -4   5   1    4.25    0.18
   3  -5  -1   64.98    1.30
   3  -5  -1   65.61    1.36
   3  -5  -1   63.44    1.29
  -3   5   1   65.67    1.30
  -3   5   1   63.42    1.39
   2  -5  -1    3.54    0.16
   2  -5  -1    3.29    0.15
   2  -5  -1    3.75    0.13
  -2   5   1    3.81    0.19
  -2   5   1    3.33    0.16
   1  -5  -1   68.80    1.40
   1  -5  -1   68.07    1.36
   1  -5  -1   68.77    1.40
  -1   5   1   67.76    1.46
  -1   5   1   67.39    1.36
   0  -5  -1   86.99    1.67
   0  -5  -1   83.34    1.74
   0   5   1   85.53    1.72
   0   5   1   84.26    1.78
   0   5   1   82.11    1.67
  -1  -5  -1   62.85    1.36
  -1  -5  -1   63.96    1.30
   1   5   1   64.55    1.39
   1   5   1   66.61    1.32
   1   5   1   64.04    1.30
  -2  -5  -1    4.27    0.22
  -2  -5  -1    4.34    0.19
   2   5   1    4.35    0.16
   2   5   1    4.40    0.21
   2   5   1    4.65    0.19
  -3  -5  -1   40.17    0.86
  -3  -5  -1   39.63    0.92
   3   5   1   40.08    0.92
   3   5   1   39.43    0.83
   3   5   1   39.98    0.86
  -4  -5  -1    1.53    0.17
  -4  -5  -1    1.59    0.15
   4   5   1    1.64    0.16
   4   5   1    1.65    0.11
   4   5   1    1.62    0.15
  -5  -5  -1    5.38    0.25
  -5  -5  -1    5.40    0.30
   5   5   1    5.05    0.29
   5   5   1    5.58    0.20
   5   5   1    5.80    0.25
  -6  -5  -1    1.51    0.18
  -6  -5  -1    1.11    0.19
   6   5   1    1.42    0.12
   6   5   1    1.81    0.19
  -7  -5  -1   19.45    0.62
  -7  -5  -1   19.63    0.54
   7   5   1   20.56    0.60
   7   5   1   20.05    0.49
  -8  -5  -1    0.13    0.17
  -8  -5  -1    0.57    0.21
   8   5   1    0.10    0.17
  -9  -5  -1    3.78    0.33
  -9  -5  -1    3.29    0.27
   9   5   1    3.88    0.31
 -10  -5  -1    5.63    0.40
 -10  -5  -1    5.31    0.34
  10   5   1    5.56    0.37
 -11  -5  -1    5.72    0.37
 -11  -5  -1    5.22    0.42
  11   5   1    5.94    0.41
 -12  -5  -1    7.91    0.44
 -12  -5  -1    9.15    0.57
  12   5   1    8.10    0.52
 -13  -5  -1   -0.31    0.31
 -13  -5  -1   -0.34    0.25
  13   5   1   -0.60    0.28
 -14  -5  -1    0.32    0.34
  14   5   1    0.73    0.35
 -15  -5  -1   -0.11    0.37
  15   5   1   -0.16    0.34
  17  -6  -1    0.32    0.39
 -17   6   1    0.13    0.38
 -17   6   1   -0.05    0.31
  16  -6  -1    1.89    0.39
 -16   6   1    1.82    0.40
 -16   6   1    1.93    0.35
  15  -6  -1    7.13    0.52
 -15   6   1    6.16    0.43
 -15   6   1    6.24    0.50
  14  -6  -1    2.37    0.36
 -14   6   1    2.15    0.36
 -14   6   1    2.36    0.31
  13  -6  -1    0.78    0.31
 -13   6   1    0.43    0.22
 -13   6   1    1.34    0.31
  12  -6  -1    3.29    0.36
 -12   6   1    2.73    0.27
 -12   6   1    2.87    0.33
  11  -6  -1   18.64    0.65
 -11   6   1   19.23    0.65
 -11   6   1   17.84    0.55
  10  -6  -1    5.90    0.38
 -10   6   1    5.72    0.31
 -10   6   1    5.72    0.39
   9  -6  -1    7.15    0.40
  -9   6   1    7.56    0.32
  -9   6   1    6.73    0.36
   8  -6  -1    1.06    0.20
  -8   6   1    1.25    0.16
  -8   6   1    0.96    0.18
  -7   6   1    6.48    0.33
  -7   6   1    6.76    0.27
   6  -6  -1    0.30    0.14
  -6   6   1    0.14    0.13
  -6   6   1    0.30    0.11
   5  -6  -1   67.89    1.48
   5  -6  -1   70.05    1.39
  -5   6   1   70.01    1.41
  -5   6   1   67.39    1.51
   4  -6  -1    2.57    0.15
   4  -6  -1    2.43    0.09
   4  -6  -1    2.78    0.19
  -4   6   1    2.49    0.16
  -4   6   1    2.48    0.19
   3  -6  -1   15.37    0.35
   3  -6  -1   15.32    0.38
   3  -6  -1   15.60    0.41
  -3   6   1   15.32    0.45
  -3   6   1   14.99    0.39
   2  -6  -1    4.72    0.18
   2  -6  -1    5.37    0.22
   2  -6  -1    5.26    0.19
  -2   6   1    4.65    0.26
  -2   6   1    4.85    0.20
   1  -6  -1    8.55    0.26
   1  -6  -1    8.25    0.26
   1  -6  -1    8.93    0.26
  -1   6   1    8.57    0.26
  -1   6   1    8.09    0.30
   0  -6  -1   17.36    0.42
   0  -6  -1   17.46    0.44
   0  -6  -1   17.00    0.41
   0   6   1   16.85    0.43
   0   6   1   17.14    0.48
  -1  -6  -1   57.60    1.22
  -1  -6  -1   54.22    1.15
   1   6   1   56.84    1.16
   1   6   1   55.49    1.24
   1   6   1   54.78    1.16
  -2  -6  -1   57.10    1.25
  -2  -6  -1   57.02    1.18
   2   6   1   56.43    1.17
   2   6   1   57.13    1.26
   2   6   1   55.42    1.18
  -3  -6  -1   48.68    1.10
  -3  -6  -1   46.66    1.02
   3   6   1   48.95    1.00
   3   6   1   48.32    1.03
   3   6   1   46.95    1.10
  -4  -6  -1    3.87    0.22
  -4  -6  -1    4.46    0.30
   4   6   1    4.09    0.22
   4   6   1    4.29    0.17
   4   6   1    4.32    0.26
  -5  -6  -1    8.58    0.33
  -5  -6  -1    9.07    0.40
   5   6   1    8.48    0.26
   5   6   1    9.24    0.33
   5   6   1    8.11    0.35
  -6  -6  -1   24.04    0.69
  -6  -6  -1   23.76    0.62
   6   6   1   22.65    0.67
  -7  -6  -1    0.61    0.20
  -7  -6  -1    0.56    0.17
   7   6   1    0.71    0.19
  -8  -6  -1   -0.08    0.17
  -8  -6  -1    0.23    0.21
   8   6   1    0.26    0.19
  -9  -6  -1    7.69    0.38
  -9  -6  -1    7.60    0.45
   9   6   1    8.40    0.42
 -10  -6  -1    2.51    0.33
 -10  -6  -1    2.57    0.28
  10   6   1    2.74    0.30
 -11  -6  -1    0.13    0.25
 -11  -6  -1   -0.17    0.27
  11   6   1   -0.15    0.26
 -12  -6  -1    1.00    0.32
 -12  -6  -1    1.37    0.31
  12   6   1    0.80    0.29
 -13  -6  -1    2.66    0.43
  13   6   1    2.47    0.38
 -14  -6  -1    0.68    0.39
  14   6   1    1.18    0.37
  17  -7  -1    3.12    0.49
 -17   7   1    1.63    0.36
 -17   7   1    2.52    0.45
  16  -7  -1    1.55    0.43
 -16   7   1    1.74    0.38
 -16   7   1    1.92    0.34
  15  -7  -1    1.05    0.37
 -15   7   1    1.01    0.30
 -15   7   1    1.79    0.37
  14  -7  -1   -0.04    0.32
 -14   7   1    0.18    0.24
 -14   7   1    0.27    0.31
  13  -7  -1   20.42    0.77
 -13   7   1   19.89    0.71
 -13   7   1   20.69    0.66
  12  -7  -1    0.44    0.28
 -12   7   1    0.19    0.24
 -12   7   1    0.50    0.22
  11  -7  -1    1.74    0.30
 -11   7   1    1.78    0.28
 -11   7   1    1.36    0.22
  10  -7  -1    0.39    0.21
 -10   7   1    0.32    0.17
 -10   7   1    0.40    0.22
   9  -7  -1   26.89    0.78
  -9   7   1   26.70    0.69
  -9   7   1   27.54    0.77
   8  -7  -1    7.59    0.37
  -8   7   1    7.01    0.30
  -8   7   1    7.30    0.36
   7  -7  -1    0.70    0.17
  -7   7   1    0.78    0.17
  -7   7   1    1.10    0.16
   6  -7  -1   -0.12    0.13
  -6   7   1    0.00    0.12
  -6   7   1    0.15    0.15
   5  -7  -1    2.08    0.18
  -5   7   1    2.44    0.20
  -5   7   1    1.92    0.16
   4  -7  -1    6.27    0.18
   4  -7  -1    6.65    0.27
   4  -7  -1    6.60    0.23
  -4   7   1    5.92    0.29
   3  -7  -1    7.37    0.22
   3  -7  -1    7.87    0.27
   3  -7  -1    7.66    0.28
  -3   7   1    7.13    0.26
  -3   7   1    7.84    0.34
   2  -7  -1    5.01    0.21
   2  -7  -1    5.18    0.20
   2  -7  -1    6.01    0.24
  -2   7   1    5.15    0.22
  -2   7   1    5.22    0.28
   1  -7  -1   63.94    1.34
   1  -7  -1   64.28    1.35
   1  -7  -1   62.87    1.31
  -1   7   1   63.48    1.42
  -1   7   1   64.07    1.32
   0  -7  -1   22.66    0.53
   0  -7  -1   22.34    0.53
   0  -7  -1   22.06    0.55
   0   7   1   22.69    0.61
   0   7   1   22.04    0.54
  -1  -7  -1    6.55    0.25
  -1  -7  -1    6.29    0.27
  -1  -7  -1    6.60    0.23
   1   7   1    6.52    0.26
   1   7   1    6.09    0.31
  -2  -7  -1    8.53    0.29
  -2  -7  -1    8.27    0.34
   2   7   1    8.89    0.26
   2   7   1    8.07    0.34
   2   7   1    8.78    0.30
  -3  -7  -1   35.33    0.86
  -3  -7  -1   34.51    0.79
   3   7   1   34.23    0.80
   3   7   1   34.96    0.75
   3   7   1   34.96    0.87
  -4  -7  -1    3.43    0.25
  -4  -7  -1    3.04    0.21
   4   7   1    3.47    0.17
   4   7   1    3.46    0.23
   4   7   1    3.06    0.25
  -5  -7  -1    6.86    0.32
  -5  -7  -1    6.93    0.36
   5   7   1    6.94    0.35
  -6  -7  -1    2.15    0.25
  -6  -7  -1    2.10    0.22
   6   7   1    2.00    0.24
  -7  -7  -1    1.49    0.21
  -7  -7  -1    1.66    0.26
   7   7   1    1.76    0.24
  -8  -7  -1    0.14    0.20
  -8  -7  -1   -0.01    0.22
   8   7   1    0.22    0.21
  -9  -7  -1    1.50    0.31
  -9  -7  -1    1.03    0.24
   9   7   1    0.35    0.25
 -10  -7  -1    0.19    0.29
 -10  -7  -1   -0.24    0.23
  10   7   1   -0.03    0.26
 -11  -7  -1    0.18    0.32
 -11  -7  -1   -0.14    0.24
  11   7   1    0.24    0.29
 -12  -7  -1    1.38    0.36
  12   7   1    1.09    0.34
 -13  -7  -1   -0.21    0.36
  13   7   1   -0.06    0.33
 -14  -7  -1    0.34    0.40
  14   7   1   -0.05    0.36
  17  -8  -1    0.61    0.43
 -17   8   1    0.51    0.33
 -17   8   1    0.16    0.39
  16  -8  -1   -0.02    0.38
 -16   8   1    0.08    0.30
 -16   8   1   -0.04    0.36
  15  -8  -1   15.37    0.75
 -15   8   1   14.91    0.71
 -15   8   1   16.89    0.64
  14  -8  -1    9.62    0.57
 -14   8   1    8.87    0.49
 -14   8   1    8.84    0.52
  13  -8  -1   12.71    0.62
 -13   8   1   13.06    0.53
 -13   8   1   13.28    0.59
  12  -8  -1    0.10    0.27
 -12   8   1    0.41    0.22
 -12   8   1    0.29    0.25
  11  -8  -1   43.80    1.16
 -11   8   1   42.52    1.13
 -11   8   1   41.46    1.02
  10  -8  -1    5.10    0.38
 -10   8   1    4.77    0.32
 -10   8   1    4.28    0.33
   9  -8  -1    9.88    0.48
  -9   8   1    9.77    0.37
  -9   8   1   10.28    0.47
   8  -8  -1    1.29    0.24
  -8   8   1    1.41    0.22
  -8   8   1    1.36    0.19
   7  -8  -1   18.35    0.58
  -7   8   1   16.88    0.49
  -7   8   1   17.37    0.56
   6  -8  -1    8.34    0.36
  -6   8   1    8.09    0.31
  -6   8   1    8.25    0.37
   5  -8  -1    4.46    0.14
   5  -8  -1    4.10    0.26
  -5   8   1    3.82    0.23
  -5   8   1    4.28    0.28
   4  -8  -1    0.81    0.09
   4  -8  -1    0.83    0.13
   4  -8  -1    0.68    0.15
  -4   8   1    0.87    0.17
  -4   8   1    0.74    0.14
   3  -8  -1   25.78    0.60
   3  -8  -1   28.29    0.64
   3  -8  -1   26.53    0.66
  -3   8   1   26.01    0.64
  -3   8   1   26.76    0.72
   2  -8  -1   11.54    0.34
   2  -8  -1   12.10    0.34
   2  -8  -1   11.12    0.35
  -2   8   1   11.03    0.43
  -2   8   1   11.49    0.36
   1  -8  -1    0.26    0.11
   1  -8  -1    0.34    0.11
   1  -8  -1    0.15    0.11
  -1   8   1    0.16    0.12
  -1   8   1    0.28    0.14
   0  -8  -1    0.04    0.12
   0  -8  -1    0.10    0.10
   0  -8  -1   -0.02    0.10
   0   8   1    0.15    0.15
   0   8   1    0.14    0.12
  -1  -8  -1    8.05    0.29
  -1  -8  -1    7.85    0.31
  -1  -8  -1    7.85    0.27
   1   8   1    7.26    0.37
   1   8   1    7.64    0.30
  -2  -8  -1   28.00    0.73
  -2  -8  -1   27.83    0.62
  -2  -8  -1   27.96    0.67
   2   8   1   26.86    0.75
   2   8   1   26.41    0.67
  -3  -8  -1    0.36    0.16
  -3  -8  -1    0.30    0.15
   3   8   1    1.01    0.18
   3   8   1    0.63    0.15
   3   8   1    0.59    0.11
  -4  -8  -1    2.30    0.25
  -4  -8  -1    2.35    0.21
   4   8   1    2.37    0.25
  -5  -8  -1    3.83    0.30
  -5  -8  -1    2.57    0.23
   5   8   1    3.33    0.28
  -6  -8  -1   21.43    0.69
  -6  -8  -1   20.75    0.60
   6   8   1   22.19    0.69
  -7  -8  -1   10.16    0.49
  -7  -8  -1   11.33    0.43
   7   8   1   10.28    0.50
  -8  -8  -1    0.17    0.21
  -8  -8  -1    0.51    0.25
   8   8   1    0.14    0.22
  -9  -8  -1    0.08    0.24
  -9  -8  -1    0.08    0.28
   9   8   1   -0.29    0.25
 -10  -8  -1   -0.12    0.28
 -10  -8  -1    0.32    0.26
  10   8   1    0.16    0.29
 -11  -8  -1    0.16    0.32
  11   8   1    0.20    0.32
 -12  -8  -1    6.14    0.51
  12   8   1    6.88    0.52
 -13  -8  -1    0.18    0.38
  13   8   1    0.81    0.37
  16  -9  -1    0.24    0.38
 -16   9   1   -0.22    0.29
 -16   9   1   -0.06    0.33
  15  -9  -1   11.92    0.70
 -15   9   1   12.42    0.66
 -15   9   1   12.10    0.57
  14  -9  -1    1.00    0.34
 -14   9   1    0.43    0.31
 -14   9   1    0.64    0.28
  13  -9  -1    8.10    0.54
 -13   9   1   10.07    0.52
 -13   9   1    8.77    0.47
  12  -9  -1   -0.07    0.29
 -12   9   1   -0.04    0.25
 -12   9   1    0.22    0.22
  11  -9  -1   20.20    0.71
 -11   9   1   20.03    0.61
 -11   9   1   19.31    0.68
  10  -9  -1    1.32    0.29
 -10   9   1    1.67    0.27
 -10   9   1    1.48    0.22
   9  -9  -1   21.68    0.70
  -9   9   1   21.61    0.70
  -9   9   1   21.52    0.62
   8  -9  -1    0.22    0.20
  -8   9   1    0.48    0.17
  -8   9   1    0.65    0.21
   7  -9  -1   24.70    0.72
  -7   9   1   22.95    0.62
  -7   9   1   24.50    0.73
   6  -9  -1    3.31    0.26
  -6   9   1    3.52    0.28
  -6   9   1    3.43    0.24
   5  -9  -1   44.88    1.03
  -5   9   1   42.72    1.06
  -5   9   1   41.03    0.97
   4  -9  -1    2.37    0.21
   4  -9  -1    2.50    0.16
  -4   9   1    2.09    0.23
   3  -9  -1   40.19    0.94
   3  -9  -1   41.43    0.89
   3  -9  -1   40.49    0.90
  -3   9   1   39.00    1.00
  -3   9   1   40.19    0.92
   2  -9  -1    2.45    0.18
   2  -9  -1    2.13    0.18
   2  -9  -1    2.61    0.17
  -2   9   1    2.53    0.24
  -2   9   1    2.28    0.19
   1  -9  -1    5.99    0.27
   1  -9  -1    6.14    0.27
   1  -9  -1    6.14    0.27
  -1   9   1    6.45    0.34
  -1   9   1    4.92    0.27
   0  -9  -1    3.41    0.19
   0  -9  -1    3.01    0.21
   0  -9  -1    2.99    0.22
   0   9   1    3.19    0.26
   0   9   1    2.75    0.21
  -1  -9  -1   29.88    0.69
  -1  -9  -1   29.74    0.76
  -1  -9  -1   30.66    0.72
   1   9   1   29.81    0.73
   1   9   1   29.06    0.80
  -2  -9  -1    0.62    0.12
  -2  -9  -1    0.45    0.17
  -2  -9  -1    0.61    0.16
   2   9   1    0.47    0.18
   2   9   1    0.72    0.16
  -3  -9  -1    2.56    0.25
  -3  -9  -1    2.70    0.23
   3   9   1    2.68    0.27
  -4  -9  -1   12.05    0.49
  -4  -9  -1   12.31    0.43
   4   9   1   13.98    0.53
  -5  -9  -1    7.53    0.42
  -5  -9  -1    7.30    0.35
   5   9   1    7.44    0.42
  -6  -9  -1    1.85    0.24
  -6  -9  -1    2.25    0.31
   6   9   1    2.08    0.28
  -7  -9  -1    1.39    0.29
  -7  -9  -1    1.64    0.25
   7   9   1    1.35    0.29
  -8  -9  -1    4.21    0.40
  -8  -9  -1    3.14    0.31
   8   9   1    3.09    0.36
  -9  -9  -1    0.59    0.31
   9   9   1    0.36    0.29
 -10  -9  -1   -0.01    0.30
  10   9   1    0.40    0.31
 -11  -9  -1    0.42    0.33
  11   9   1    0.92    0.35
 -12  -9  -1   -0.07    0.34
  12   9   1    0.77    0.37
  16 -10  -1    0.23    0.38
 -16  10   1    0.71    0.32
 -16  10   1    0.84    0.37
  15 -10  -1    1.41    0.42
 -15  10   1    1.11    0.33
 -15  10   1    1.49    0.39
  14 -10  -1   -0.04    0.33
 -14  10   1   -0.19    0.32
 -14  10   1    0.36    0.26
  13 -10  -1   12.53    0.64
 -13  10   1   13.10    0.64
 -13  10   1   14.38    0.57
  12 -10  -1    1.31    0.35
 -12  10   1    2.17    0.29
 -12  10   1    2.49    0.35
  11 -10  -1   15.43    0.63
 -11  10   1   15.63    0.64
 -11  10   1   13.89    0.52
  10 -10  -1    2.09    0.31
 -10  10   1    2.20    0.31
 -10  10   1    2.21    0.27
   9 -10  -1    3.87    0.34
  -9  10   1    4.20    0.30
  -9  10   1    3.95    0.33
   8 -10  -1    0.14    0.22
  -8  10   1   -0.18    0.16
  -8  10   1    0.00    0.22
   7 -10  -1    3.58    0.30
  -7  10   1    3.85    0.27
  -7  10   1    3.66    0.31
   6 -10  -1   21.62    0.64
  -6  10   1   22.23    0.70
  -6  10   1   21.14    0.59
   5 -10  -1   25.83    0.72
  -5  10   1   26.73    0.78
  -5  10   1   25.46    0.67
   4 -10  -1   -0.13    0.16
  -4  10   1    0.10    0.14
  -4  10   1   -0.33    0.16
   3 -10  -1    2.97    0.23
   3 -10  -1    3.18    0.21
  -3  10   1    2.54    0.26
  -3  10   1    3.27    0.23
   2 -10  -1   19.36    0.55
   2 -10  -1   19.72    0.52
  -2  10   1   19.56    0.63
  -2  10   1   19.44    0.56
   1 -10  -1    0.80    0.17
   1 -10  -1    1.22    0.16
   1 -10  -1    0.59    0.16
  -1  10   1    0.84    0.21
  -1  10   1    0.69    0.16
   0 -10  -1   20.07    0.56
   0 -10  -1   19.63    0.53
   0 -10  -1   19.45    0.56
   0  10   1   21.11    0.57
   0  10   1   20.19    0.65
  -1 -10  -1    0.88    0.15
  -1 -10  -1    0.98    0.18
  -1 -10  -1    1.45    0.21
   1  10   1    0.55    0.20
   1  10   1    0.92    0.18
  -2 -10  -1    7.18    0.39
  -2 -10  -1    6.97    0.32
   2  10   1    7.11    0.44
  -3 -10  -1    0.76    0.23
  -3 -10  -1    0.69    0.19
   3  10   1    0.56    0.22
  -4 -10  -1   18.39    0.55
  -4 -10  -1   18.18    0.62
   4  10   1   16.96    0.62
  -5 -10  -1    0.01    0.22
  -5 -10  -1   -0.07    0.19
   5  10   1    0.14    0.24
  -6 -10  -1    0.45    0.25
  -6 -10  -1    0.76    0.22
   6  10   1    0.35    0.27
  -7 -10  -1    0.09    0.25
   7  10   1    0.19    0.28
  -8 -10  -1    0.39    0.30
   8  10   1    0.97    0.32
  -9 -10  -1   -0.25    0.28
   9  10   1   -0.04    0.31
 -10 -10  -1   -0.26    0.31
  10  10   1    0.37    0.34
 -11 -10  -1    0.34    0.38
  11  10   1    0.27    0.35
 -12 -10  -1    1.16    0.43
  12  10   1    2.04    0.44
  16 -11  -1    3.41    0.50
 -16  11   1    3.28    0.48
 -16  11   1    2.99    0.42
  15 -11  -1   10.46    0.70
 -15  11   1   10.00    0.53
 -15  11   1   10.52    0.65
  14 -11  -1    0.93    0.39
 -14  11   1   -0.04    0.32
 -14  11   1    0.48    0.30
  13 -11  -1    2.03    0.38
 -13  11   1    1.48    0.29
 -13  11   1    1.14    0.33
  12 -11  -1    0.62    0.32
 -12  11   1    0.58    0.25
 -12  11   1    0.54    0.31
  11 -11  -1   31.44    0.98
 -11  11   1   32.98    0.89
  10 -11  -1    0.33    0.27
 -10  11   1    0.41    0.27
 -10  11   1    0.12    0.21
   9 -11  -1    5.13    0.39
  -9  11   1    4.75    0.37
  -9  11   1    4.76    0.33
   8 -11  -1    0.03    0.22
  -8  11   1   -0.05    0.20
  -8  11   1   -0.26    0.22
   7 -11  -1   17.44    0.62
  -7  11   1   16.65    0.54
  -7  11   1   17.77    0.63
   6 -11  -1   -0.09    0.20
  -6  11   1    0.03    0.17
  -6  11   1   -0.02    0.20
   5 -11  -1    0.74    0.20
  -5  11   1    0.77    0.25
  -5  11   1    0.82    0.19
   4 -11  -1    0.57    0.20
  -4  11   1    0.70    0.22
   3 -11  -1   21.65    0.57
   3 -11  -1   21.92    0.61
  -3  11   1   21.77    0.70
  -3  11   1   21.92    0.61
   2 -11  -1    0.18    0.15
   2 -11  -1    0.13    0.16
  -2  11   1    0.47    0.22
  -2  11   1    0.06    0.17
   1 -11  -1    1.52    0.19
   1 -11  -1    0.84    0.18
  -1  11   1    1.13    0.19
  -1  11   1    1.25    0.24
   0 -11  -1    0.42    0.19
   0 -11  -1    0.68    0.17
   0  11   1    0.61    0.18
   0  11   1    0.33    0.22
  -1 -11  -1    1.91    0.23
   1  11   1    1.68    0.28
  -2 -11  -1    5.16    0.35
   2  11   1    4.73    0.37
  -3 -11  -1    0.33    0.21
   3  11   1    0.29    0.25
  -4 -11  -1    8.13    0.44
   4  11   1    7.92    0.52
  -5 -11  -1    0.08    0.24
   5  11   1    0.14    0.28
  -6 -11  -1    0.38    0.27
   6  11   1    0.09    0.28
  -7 -11  -1    0.19    0.28
   7  11   1    0.06    0.28
  -8 -11  -1    1.69    0.34
   8  11   1    1.41    0.34
  -9 -11  -1    1.50    0.37
   9  11   1    1.89    0.39
 -10 -11  -1    0.91    0.37
  10  11   1    1.14    0.39
 -11 -11  -1    0.93    0.42
  11  11   1    0.54    0.40
  15 -12  -1    0.00    0.38
 -15  12   1    0.57    0.39
 -15  12   1    0.44    0.33
  14 -12  -1    0.63    0.38
 -14  12   1    0.87    0.31
 -14  12   1    0.47    0.34
  13 -12  -1    9.54    0.60
 -13  12   1    9.77    0.57
 -13  12   1    9.77    0.53
  12 -12  -1    0.58    0.33
 -12  12   1   -0.07    0.28
 -12  12   1    0.18    0.25
  11 -12  -1    0.09    0.31
 -11  12   1    0.37    0.30
 -11  12   1    0.26    0.26
  10 -12  -1    2.91    0.37
 -10  12   1    1.87    0.32
 -10  12   1    2.66    0.31
   9 -12  -1   22.72    0.78
  -9  12   1   23.61    0.78
  -9  12   1   24.62    0.70
   8 -12  -1    5.01    0.40
  -8  12   1    6.08    0.42
  -8  12   1    4.91    0.34
   7 -12  -1    0.11    0.22
  -7  12   1    0.32    0.26
  -7  12   1    0.11    0.20
   6 -12  -1    5.50    0.37
  -6  12   1    5.73    0.40
  -6  12   1    5.41    0.34
   5 -12  -1    1.36    0.25
  -5  12   1    1.29    0.22
  -5  12   1    1.52    0.29
   4 -12  -1   14.12    0.52
  -4  12   1   15.27    0.59
   3 -12  -1    1.54    0.22
  -3  12   1    1.89    0.30
  -3  12   1    1.88    0.24
   2 -12  -1    2.47    0.23
   2 -12  -1    2.98    0.25
  -2  12   1    2.90    0.34
  -2  12   1    3.05    0.28
   1 -12  -1    7.98    0.35
   1 -12  -1    7.52    0.37
  -1  12   1    8.05    0.47
   0 -12  -1    0.65    0.21
   0  12   1    0.02    0.25
  -1 -12  -1    2.70    0.28
   1  12   1    2.57    0.34
  -2 -12  -1    1.19    0.25
   2  12   1    0.89    0.29
  -3 -12  -1    0.35    0.24
   3  12   1    0.72    0.28
  -4 -12  -1    2.04    0.31
   4  12   1    2.61    0.37
  -5 -12  -1    0.22    0.28
   5  12   1    0.04    0.30
  -6 -12  -1    0.94    0.31
   6  12   1    0.36    0.33
  -7 -12  -1    1.19    0.36
   7  12   1    1.49    0.35
  -8 -12  -1   -0.05    0.32
   8  12   1   -0.43    0.33
  -9 -12  -1   -0.06    0.36
   9  12   1   -0.44    0.35
 -10 -12  -1   -0.16    0.35
  10  12   1   -0.15    0.38
  14 -13  -1    0.85    0.40
 -14  13   1    0.94    0.32
 -14  13   1    0.20    0.37
  13 -13  -1    0.09    0.34
 -13  13   1   -0.09    0.33
 -13  13   1    0.22    0.30
  12 -13  -1   -0.15    0.35
 -12  13   1    0.11    0.33
 -12  13   1    0.05    0.28
  11 -13  -1    9.51    0.56
 -11  13   1    9.03    0.57
 -11  13   1    8.99    0.48
  10 -13  -1   -0.55    0.27
 -10  13   1    0.13    0.29
 -10  13   1    0.59    0.26
   9 -13  -1   -0.03    0.29
  -9  13   1    0.19    0.29
  -9  13   1    0.03    0.25
   8 -13  -1    5.55    0.43
  -8  13   1    4.80    0.41
  -8  13   1    5.13    0.37
   7 -13  -1   18.33    0.66
  -7  13   1   16.36    0.67
   6 -13  -1    0.13    0.25
  -6  13   1    0.48    0.23
  -6  13   1    0.14    0.26
   5 -13  -1    0.33    0.23
  -5  13   1    0.35    0.26
  -5  13   1   -0.12    0.20
   4 -13  -1   22.64    0.68
  -4  13   1   20.76    0.65
  -4  13   1   21.09    0.77
   3 -13  -1    4.45    0.32
  -3  13   1    3.98    0.38
   2 -13  -1    5.20    0.35
  -2  13   1    5.84    0.44
   1 -13  -1    0.07    0.20
  -1  13   1   -0.19    0.27
   0 -13  -1    4.23    0.32
   0  13   1    5.02    0.41
  -1 -13  -1    0.30    0.24
   1  13   1   -0.05    0.25
  -2 -13  -1   14.32    0.58
   2  13   1   13.51    0.66
  -3 -13  -1    0.04    0.26
   3  13   1    0.62    0.32
  -4 -13  -1    0.52    0.28
   4  13   1    0.58    0.34
  -5 -13  -1   -0.09    0.31
   5  13   1    0.51    0.34
  -6 -13  -1    6.46    0.51
   6  13   1    7.38    0.53
  -7 -13  -1    0.39    0.32
   7  13   1   -0.09    0.36
  -8 -13  -1    0.45    0.38
   8  13   1    0.95    0.39
  -9 -13  -1    1.21    0.42
   9  13   1    0.72    0.41
  14 -14  -1    0.00    0.42
 -14  14   1    0.02    0.39
  13 -14  -1    6.03    0.56
 -13  14   1    6.85    0.56
  12 -14  -1    2.47    0.45
 -12  14   1    1.96    0.34
 -12  14   1    1.92    0.38
  11 -14  -1    1.32    0.39
 -11  14   1    1.90    0.36
 -11  14   1    1.51    0.31
  10 -14  -1   -0.06    0.31
 -10  14   1   -0.16    0.29
 -10  14   1   -0.24    0.25
   9 -14  -1    0.66    0.33
  -9  14   1    0.32    0.32
  -9  14   1    0.73    0.27
   8 -14  -1    2.25    0.37
  -8  14   1    2.29    0.31
  -8  14   1    1.73    0.37
   7 -14  -1    3.40    0.36
  -7  14   1    3.92    0.34
  -7  14   1    3.61    0.39
  -6  14   1    1.51    0.34
   5 -14  -1    0.02    0.24
  -5  14   1   -0.18    0.29
   4 -14  -1    3.24    0.33
  -4  14   1    2.87    0.36
   3 -14  -1    2.07    0.29
  -3  14   1    1.63    0.35
  -2  14   1    0.41    0.31
  -1  14   1    0.70    0.30
   0 -14  -1   -0.02    0.23
   0  14   1    0.07    0.31
  -1 -14  -1   -0.15    0.25
   1  14   1    0.67    0.31
  -2 -14  -1    0.32    0.27
   2  14   1    0.11    0.31
  -3 -14  -1    1.47    0.33
   3  14   1    1.49    0.38
  -4 -14  -1    0.46    0.32
   4  14   1    0.63    0.36
  -5 -14  -1    0.51    0.34
   5  14   1    0.32    0.37
  -6 -14  -1    0.83    0.38
   6  14   1    1.31    0.39
  -7 -14  -1   -0.13    0.35
   7  14   1   -0.61    0.33
  -8 -14  -1    3.43    0.48
   8  14   1    3.24    0.50
  13 -15  -1    0.40    0.41
 -13  15   1   -0.34    0.38
  12 -15  -1    0.79    0.39
 -12  15   1    0.92    0.39
  11 -15  -1    6.41    0.53
 -11  15   1    5.06    0.48
  10 -15  -1    2.71    0.41
 -10  15   1    2.65    0.42
   9 -15  -1    0.34    0.34
  -9  15   1   -0.27    0.33
   8 -15  -1    3.50    0.40
  -8  15   1    2.72    0.41
   7 -15  -1    4.46    0.41
  -7  15   1    4.04    0.45
   6 -15  -1    4.19    0.40
  -6  15   1    3.98    0.42
   5 -15  -1    3.23    0.35
  -5  15   1    2.90    0.39
   4 -15  -1    1.11    0.28
  -4  15   1    1.19    0.37
  -3  15   1    1.23    0.34
  -2  15   1    2.89    0.39
  -1  15   1    0.10    0.33
   0  15   1    0.72    0.34
  -1 -15  -1    0.27    0.27
   1  15   1    0.03    0.32
  -2 -15  -1    0.97    0.30
   2  15   1    1.73    0.41
  -3 -15  -1    0.18    0.31
   3  15   1    0.22    0.37
  -4 -15  -1    1.20    0.37
   4  15   1    1.15    0.41
  -5 -15  -1   -0.12    0.34
   5  15   1    0.44    0.40
  -6 -15  -1    0.02    0.37
   6  15   1    0.14    0.37
  11 -16  -1    0.53    0.39
 -11  16   1   -0.23    0.37
  10 -16  -1   -0.18    0.37
 -10  16   1   -0.22    0.37
   9 -16  -1    0.22    0.34
  -9  16   1   -0.16    0.33
   8 -16  -1    2.34    0.39
  -8  16   1    1.79    0.41
   7 -16  -1    0.45    0.33
  -7  16   1    0.02    0.33
   6 -16  -1    1.23    0.35
  -6  16   1    1.33    0.39
   5 -16  -1    3.18    0.39
  -5  16   1    2.91    0.43
  -4  16   1    0.25    0.33
  -3  16   1    0.04    0.33
  -2  16   1    4.89    0.50
  -1  16   1   -0.14    0.36
   0  16   1   -0.09    0.37
   1  16   1    2.33    0.42
   2  16   1    0.37    0.37
  -3 -16  -1    1.00    0.36
   3  16   1    1.25    0.44
  -4 -16  -1    7.89    0.57
   4  16   1    9.04    0.67
  -5 -16  -1    1.95    0.42
   5  16   1    1.78    0.47
  10 -17  -1    0.34    0.38
 -10  17   1    0.54    0.40
   9 -17  -1    2.29    0.43
  -9  17   1    2.69    0.47
   8 -17  -1    0.10    0.36
  -8  17   1    0.42    0.39
   7 -17  -1    2.00    0.40
  -7  17   1    1.47    0.43
  -6  17   1    0.18    0.38
  -5  17   1    4.07    0.51
  -4  17   1    1.52    0.40
  -3  17   1    1.23    0.41
  -2  17   1    0.80    0.42
  -1  17   1   -0.31    0.38
   0  17   1    0.39    0.41
   1  17   1   -0.44    0.40
   2  17   1    1.19    0.47
  -7  18   1   -0.14    0.41
  -6  18   1    2.51    0.47
  -5  18   1    0.26    0.41
  -4  18   1    3.81    0.50
  -3  18   1    0.09    0.38
  -2  18   1    0.54    0.44
  -1  18   1    0.19    0.40
  -1  18  -2    3.53    0.54
  -2  18  -2   -0.11    0.41
  -3  18  -2    0.81    0.41
  -4  18  -2   -0.20    0.40
  -5  18  -2    4.81    0.54
  -6  18  -2    0.95    0.43
  -7  18  -2    1.44    0.43
   3  17  -2    1.91    0.50
  -3 -17   2    1.43    0.40
   2  17  -2    0.35    0.44
   1  17  -2    2.70    0.50
   0  17  -2   -0.07    0.41
  -1  17  -2    0.15    0.37
  -2  17  -2    0.23    0.37
  -3  17  -2    0.09    0.39
  -4  17  -2    0.47    0.36
  -5  17  -2    0.71    0.39
  -6  17  -2    0.71    0.37
  -7  17  -2    0.83    0.38
  -8  17  -2    4.01    0.50
   8 -17   2    2.71    0.45
  -9  17  -2   -0.23    0.35
   9 -17   2    0.20    0.39
   5  16  -2    0.53    0.40
  -5 -16   2    0.45    0.39
   4  16  -2   -0.76    0.39
  -4 -16   2    0.33    0.33
   3  16  -2    3.62    0.52
  -3 -16   2    3.68    0.43
   2  16  -2    0.04    0.36
  -2 -16   2    0.34    0.33
   1  16  -2    1.11    0.39
   0  16  -2    0.45    0.39
  -1  16  -2    1.09    0.41
  -2  16  -2    1.30    0.39
  -3  16  -2   14.10    0.73
  -4  16  -2    0.14    0.32
  -5  16  -2   -0.14    0.32
  -6  16  -2    1.26    0.39
   6 -16   2    1.17    0.34
  -7  16  -2    5.12    0.50
   7 -16   2    5.29    0.48
  -8  16  -2    5.69    0.51
   8 -16   2    6.57    0.53
  -9  16  -2    2.15    0.41
   9 -16   2    1.97    0.43
 -10  16  -2    9.43    0.64
  10 -16   2    8.29    0.62
 -11  16  -2    2.67    0.46
  11 -16   2    2.31    0.44
   6  15  -2    0.10    0.38
  -6 -15   2   -0.20    0.37
   5  15  -2    0.62    0.38
  -5 -15   2    0.28    0.35
   4  15  -2   -0.18    0.34
  -4 -15   2   -0.73    0.31
   3  15  -2   -0.36    0.36
  -3 -15   2    0.20    0.29
   2  15  -2   -0.17    0.35
  -2 -15   2   -0.11    0.29
   1  15  -2    0.06    0.34
  -1 -15   2   -0.08    0.27
   0  15  -2    1.62    0.39
  -1  15  -2    0.31    0.32
  -2  15  -2    0.12    0.31
  -3  15  -2   -0.01    0.32
  -4  15  -2    3.36    0.41
  -5  15  -2    0.69    0.32
   5 -15   2    0.24    0.28
  -6  15  -2    2.75    0.39
   6 -15   2    4.26    0.40
  -7  15  -2    3.41    0.41
   7 -15   2    2.52    0.38
  -8  15  -2    0.91    0.34
   8 -15   2    1.38    0.34
  -9  15  -2    0.24    0.35
   9 -15   2    0.48    0.36
 -10  15  -2    3.49    0.45
  10 -15   2    3.71    0.47
 -11  15  -2    0.40    0.35
  11 -15   2    0.25    0.39
 -12  15  -2    0.13    0.35
  12 -15   2    0.44    0.38
   8  14  -2    1.08    0.45
  -8 -14   2    0.77    0.41
   7  14  -2    1.37    0.43
  -7 -14   2    1.14    0.37
   6  14  -2    0.77    0.40
  -6 -14   2    0.32    0.35
   5  14  -2    2.75    0.45
  -5 -14   2    2.73    0.38
   4  14  -2    0.64    0.38
  -4 -14   2    0.71    0.33
   3  14  -2    0.39    0.33
  -3 -14   2   -0.38    0.28
   2  14  -2   -0.24    0.33
  -2 -14   2    0.38    0.28
   1  14  -2    2.91    0.41
  -1 -14   2    2.61    0.32
   0  14  -2    0.76    0.31
   0 -14   2    0.32    0.24
  -1  14  -2    1.65    0.33
   1 -14   2    1.42    0.26
  -2  14  -2    0.88    0.33
  -3  14  -2    2.80    0.37
  -4  14  -2    0.09    0.30
   4 -14   2    0.26    0.24
  -5  14  -2    0.88    0.30
   5 -14   2    1.33    0.29
  -6  14  -2   -0.02    0.30
   6 -14   2    0.08    0.27
  -7  14  -2    0.13    0.29
   7 -14   2    0.39    0.30
  -8  14  -2    4.65    0.43
   8 -14   2    4.40    0.42
  -9  14  -2    1.43    0.36
   9 -14   2    1.17    0.34
 -10  14  -2    1.32    0.34
  10 -14   2    2.20    0.39
 -11  14  -2    0.05    0.33
  11 -14   2    0.74    0.38
 -12  14  -2    0.36    0.33
  12 -14   2    1.12    0.39
 -13  14  -2   -0.60    0.35
  13 -14   2   -0.65    0.38
   9  13  -2   -0.19    0.36
  -9 -13   2    0.33    0.35
   8  13  -2    0.27    0.38
  -8 -13   2   -0.27    0.36
   7  13  -2   -0.01    0.37
  -7 -13   2    0.46    0.33
   6  13  -2   -0.29    0.34
  -6 -13   2   -0.10    0.29
   5  13  -2    0.25    0.31
  -5 -13   2    0.45    0.29
   4  13  -2    3.66    0.43
  -4 -13   2    4.16    0.39
   3  13  -2    0.43    0.32
  -3 -13   2    0.07    0.27
   2  13  -2    2.04    0.37
  -2 -13   2    1.59    0.29
   1  13  -2    1.60    0.32
  -1 -13   2    2.00    0.28
   0  13  -2    0.33    0.28
   0 -13   2    1.13    0.25
  -1  13  -2    4.28    0.41
   1 -13   2    4.06    0.30
  -2  13  -2    5.67    0.43
   2 -13   2    6.57    0.36
  -3  13  -2    0.39    0.28
   3 -13   2    0.38    0.21
  -4  13  -2    0.92    0.28
   4 -13   2    0.85    0.24
  -5  13  -2   15.54    0.66
   5 -13   2   15.55    0.59
  -6  13  -2    6.18    0.46
   6 -13   2    6.66    0.41
  -7  13  -2    0.43    0.27
   7 -13   2   -0.11    0.26
  -8  13  -2    3.45    0.37
   8 -13   2    4.34    0.41
  -9  13  -2    1.11    0.33
   9 -13   2    2.28    0.37
 -10  13  -2   12.78    0.63
  10 -13   2   12.12    0.62
 -11  13  -2    1.10    0.32
  11 -13   2    1.56    0.40
 -12  13  -2    1.98    0.39
  12 -13   2    2.16    0.42
 -13  13  -2   -0.15    0.34
  13 -13   2    0.47    0.36
 -14  13  -2    6.72    0.56
  14 -13   2    6.67    0.60
  10  12  -2    0.23    0.39
 -10 -12   2   -0.11    0.35
   9  12  -2    1.49    0.39
  -9 -12   2    1.63    0.40
   8  12  -2    0.24    0.33
  -8 -12   2    0.69    0.35
   7  12  -2   -0.09    0.33
  -7 -12   2   -0.20    0.29
   6  12  -2    1.90    0.35
  -6 -12   2    1.63    0.33
   5  12  -2    6.25    0.47
  -5 -12   2    5.69    0.42
   4  12  -2    0.26    0.30
  -4 -12   2    0.11    0.22
  -4 -12   2    0.17    0.26
   3  12  -2    2.25    0.34
  -3 -12   2    2.75    0.32
  -3 -12   2    2.75    0.28
   2  12  -2   -0.01    0.27
  -2 -12   2   -0.05    0.22
  -2 -12   2    0.15    0.20
   1  12  -2    8.24    0.52
  -1 -12   2    8.11    0.40
   0  12  -2    0.15    0.24
   0 -12   2    0.34    0.20
  -1  12  -2    0.14    0.25
   1 -12   2    0.53    0.19
  -2  12  -2    0.11    0.24
   2 -12   2    0.27    0.18
   2 -12   2    0.21    0.18
  -3  12  -2    0.29    0.23
   3 -12   2    0.28    0.19
  -4  12  -2   15.53    0.63
   4 -12   2   15.42    0.55
  -5  12  -2    0.14    0.25
  -5  12  -2    0.17    0.19
   5 -12   2    0.20    0.22
  -6  12  -2    1.25    0.23
  -6  12  -2    0.62    0.25
   6 -12   2    1.22    0.25
  -7  12  -2    0.98    0.27
  -7  12  -2    1.07    0.23
   7 -12   2    0.72    0.25
  -8  12  -2   29.18    0.79
  -8  12  -2   27.74    0.86
   8 -12   2   28.02    0.88
  -9  12  -2    0.34    0.24
  -9  12  -2    0.22    0.27
   9 -12   2    0.04    0.27
 -10  12  -2    1.44    0.31
 -10  12  -2    1.35    0.29
  10 -12   2    1.81    0.36
 -11  12  -2    0.18    0.25
 -11  12  -2    0.23    0.29
  11 -12   2    0.19    0.30
 -12  12  -2   11.21    0.58
  12 -12   2   10.42    0.61
 -13  12  -2    1.00    0.35
  13 -12   2    1.04    0.38
 -14  12  -2    5.14    0.49
  14 -12   2    4.94    0.53
 -15  12  -2    0.24    0.37
  15 -12   2    0.14    0.39
  11  11  -2    0.43    0.39
 -11 -11   2   -0.22    0.35
  10  11  -2    0.53    0.37
 -10 -11   2    0.03    0.31
   9  11  -2    0.42    0.36
  -9 -11   2    0.29    0.32
   8  11  -2    0.13    0.32
  -8 -11   2    0.30    0.30
  -8 -11   2    0.34    0.27
   7  11  -2    0.57    0.33
  -7 -11   2    0.93    0.32
  -7 -11   2    0.06    0.24
   6  11  -2    0.71    0.29
  -6 -11   2    1.14    0.31
  -6 -11   2    0.58    0.25
   5  11  -2    0.16    0.25
  -5 -11   2    0.09    0.21
  -5 -11   2   -0.16    0.24
   4  11  -2    1.22    0.30
  -4 -11   2    1.26    0.24
  -4 -11   2    1.16    0.27
   3  11  -2    0.42    0.24
  -3 -11   2    0.47    0.21
  -3 -11   2    0.30    0.20
   2  11  -2    0.45    0.24
  -2 -11   2   -0.04    0.19
  -2 -11   2   -0.06    0.19
   1  11  -2    0.30    0.22
  -1 -11   2    0.67    0.19
  -1 -11   2    0.46    0.20
   0  11  -2    1.24    0.25
   0 -11   2    0.85    0.20
   0 -11   2    1.26    0.21
  -1  11  -2    6.90    0.46
   1 -11   2    7.01    0.33
   1 -11   2    6.94    0.32
   1 -11   2    7.49    0.35
  -2  11  -2    2.80    0.29
  -2  11  -2    2.33    0.23
   2 -11   2    3.15    0.24
   2 -11   2    2.52    0.23
   2 -11   2    2.59    0.22
  -3  11  -2    3.88    0.34
  -3  11  -2    3.22    0.25
   3 -11   2    3.65    0.27
   3 -11   2    3.64    0.23
  -4  11  -2    0.68    0.19
  -4  11  -2    0.30    0.21
   4 -11   2   -0.07    0.18
  -5  11  -2   14.54    0.56
  -5  11  -2   14.64    0.50
   5 -11   2   13.62    0.51
  -6  11  -2    0.27    0.21
  -6  11  -2    0.72    0.21
   6 -11   2    0.43    0.21
  -7  11  -2    0.17    0.18
  -7  11  -2    0.14    0.23
   7 -11   2    0.32    0.22
  -8  11  -2    2.96    0.28
  -8  11  -2    2.73    0.32
   8 -11   2    2.73    0.32
  -9  11  -2   -0.02    0.20
  -9  11  -2    0.00    0.23
   9 -11   2   -0.18    0.26
 -10  11  -2   12.15    0.52
 -10  11  -2   11.90    0.57
  10 -11   2   13.50    0.62
 -11  11  -2    0.35    0.26
 -11  11  -2    0.47    0.27
  11 -11   2    0.71    0.33
 -12  11  -2    2.46    0.33
 -12  11  -2    2.77    0.35
  12 -11   2    2.79    0.42
 -13  11  -2    1.22    0.33
 -13  11  -2    0.95    0.29
  13 -11   2    0.74    0.35
 -14  11  -2    5.78    0.50
  14 -11   2    4.82    0.52
 -15  11  -2    0.10    0.36
  15 -11   2    0.77    0.40
  12  10  -2    0.22    0.39
 -12 -10   2    0.55    0.38
  11  10  -2    0.55    0.37
 -11 -10   2    0.08    0.34
  10  10  -2    0.85    0.36
 -10 -10   2    1.46    0.37
 -10 -10   2    1.06    0.30
   9  10  -2    1.38    0.34
  -9 -10   2    0.36    0.33
  -9 -10   2    1.34    0.30
   8  10  -2    0.11    0.27
  -8 -10   2    0.26    0.30
  -8 -10   2    0.05    0.23
   7  10  -2    1.53    0.30
  -7 -10   2    0.94    0.28
  -7 -10   2    0.58    0.23
   6  10  -2    6.35    0.44
  -6 -10   2    6.82    0.37
  -6 -10   2    6.89    0.44
   5  10  -2    3.83    0.35
  -5 -10   2    3.97    0.35
  -5 -10   2    4.11    0.30
   4  10  -2    7.09    0.47
  -4 -10   2    7.52    0.41
  -4 -10   2    8.20    0.38
   3  10  -2   -0.07    0.21
  -3 -10   2    0.05    0.16
  -3 -10   2    0.23    0.19
   2  10  -2    1.82    0.27
  -2 -10   2    1.62    0.23
  -2 -10   2    1.59    0.21
   1  10  -2    0.38    0.21
  -1 -10   2    0.34    0.16
  -1 -10   2    0.37    0.18
   0  10  -2   18.06    0.62
   0 -10   2   16.87    0.50
   0 -10   2   17.50    0.47
   0 -10   2   16.80    0.51
  -1  10  -2    0.16    0.20
  -1  10  -2    0.31    0.14
   1 -10   2   -0.04    0.14
   1 -10   2    0.04    0.12
   1 -10   2   -0.02    0.13
  -2  10  -2    0.76    0.22
  -2  10  -2    0.69    0.16
   2 -10   2    0.35    0.15
   2 -10   2    0.54    0.15
   2 -10   2    0.40    0.14
  -3  10  -2    4.43    0.32
  -3  10  -2    4.49    0.27
   3 -10   2    4.82    0.27
   3 -10   2    5.26    0.26
   3 -10   2    5.16    0.30
  -4  10  -2   13.44    0.53
   4 -10   2   14.38    0.40
   4 -10   2   13.09    0.46
  -5  10  -2    5.46    0.30
  -5  10  -2    5.04    0.35
   5 -10   2    4.97    0.32
  -6  10  -2    4.02    0.31
  -6  10  -2    4.24    0.28
   6 -10   2    4.07    0.31
  -7  10  -2    1.14    0.20
  -7  10  -2    1.35    0.25
   7 -10   2    0.94    0.23
  -8  10  -2    8.50    0.38
  -8  10  -2    8.11    0.46
   8 -10   2    8.12    0.44
  -9  10  -2    0.45    0.21
  -9  10  -2    0.45    0.23
   9 -10   2    0.52    0.25
 -10  10  -2    0.47    0.24
 -10  10  -2    0.56    0.21
  10 -10   2    0.53    0.28
 -11  10  -2   -0.23    0.23
 -11  10  -2    0.00    0.26
  11 -10   2    0.47    0.29
 -12  10  -2    4.30    0.39
 -12  10  -2    5.42    0.39
  12 -10   2    5.28    0.47
 -13  10  -2    0.07    0.28
 -13  10  -2    0.67    0.29
  13 -10   2    0.26    0.33
 -14  10  -2    7.04    0.47
 -14  10  -2    8.18    0.54
  14 -10   2    9.74    0.63
 -15  10  -2    0.24    0.35
  15 -10   2    0.36    0.36
 -16  10  -2    1.70    0.42
  16 -10   2    1.46    0.44
  13   9  -2    0.76    0.40
  12   9  -2    0.40    0.37
 -12  -9   2   -0.01    0.34
 -12  -9   2    0.09    0.32
  11   9  -2    2.13    0.37
 -11  -9   2    1.57    0.37
 -11  -9   2    1.79    0.34
  10   9  -2    0.70    0.33
 -10  -9   2    0.35    0.28
 -10  -9   2    1.13    0.33
   9   9  -2    0.12    0.28
  -9  -9   2    0.13    0.27
  -9  -9   2   -0.09    0.23
   8   9  -2    0.79    0.27
  -8  -9   2    0.82    0.24
  -8  -9   2    0.54    0.27
   7   9  -2    0.03    0.23
  -7  -9   2    0.71    0.23
  -7  -9   2    0.25    0.24
   6   9  -2    0.93    0.25
  -6  -9   2    0.66    0.24
  -6  -9   2    1.25    0.23
   5   9  -2   11.72    0.53
  -5  -9   2   11.50    0.44
  -5  -9   2   11.40    0.48
   4   9  -2    0.26    0.22
  -4  -9   2    0.29    0.18
  -4  -9   2   -0.24    0.15
   3   9  -2   24.58    0.75
  -3  -9   2   24.80    0.71
  -3  -9   2   24.84    0.64
   2   9  -2   -0.17    0.18
  -2  -9   2    0.06    0.15
  -2  -9   2   -0.26    0.13
   1   9  -2   20.47    0.64
   1   9  -2   21.33    0.56
  -1  -9   2   21.22    0.60
  -1  -9   2   21.55    0.52
  -1  -9   2   20.80    0.55
   0   9  -2   15.97    0.55
   0   9  -2   15.78    0.46
   0  -9   2   15.57    0.42
   0  -9   2   14.44    0.44
   0  -9   2   14.66    0.46
  -1   9  -2    3.03    0.21
  -1   9  -2    2.58    0.24
   1  -9   2    2.90    0.19
   1  -9   2    3.17    0.21
   1  -9   2    2.92    0.20
  -2   9  -2    7.00    0.30
  -2   9  -2    7.72    0.37
   2  -9   2    7.41    0.30
   2  -9   2    7.51    0.30
   2  -9   2    7.79    0.29
  -3   9  -2    8.65    0.33
  -3   9  -2    9.40    0.41
   3  -9   2    8.90    0.34
   3  -9   2    8.80    0.33
   3  -9   2    8.96    0.31
  -4   9  -2   15.50    0.53
  -4   9  -2   16.56    0.47
   4  -9   2   16.17    0.46
   4  -9   2   15.55    0.41
   4  -9   2   15.10    0.49
  -5   9  -2    0.90    0.19
  -5   9  -2    0.91    0.17
   5  -9   2    0.65    0.11
   5  -9   2    0.77    0.18
   5  -9   2    0.79    0.15
  -6   9  -2   54.42    1.28
  -6   9  -2   51.24    1.17
   6  -9   2   53.81    1.26
  -7   9  -2    4.54    0.28
  -7   9  -2    4.81    0.33
   7  -9   2    5.19    0.35
  -8   9  -2    0.96    0.19
  -8   9  -2    0.91    0.21
   8  -9   2    1.01    0.25
  -9   9  -2    3.25    0.27
  -9   9  -2    2.15    0.27
   9  -9   2    3.38    0.33
 -10   9  -2   55.85    1.29
 -10   9  -2   57.50    1.39
  10  -9   2   55.03    1.41
 -11   9  -2    1.76    0.30
 -11   9  -2    2.04    0.28
  11  -9   2    1.53    0.33
 -12   9  -2    0.16    0.24
 -12   9  -2    0.05    0.27
  12  -9   2   -0.01    0.28
 -13   9  -2    2.68    0.34
 -13   9  -2    3.56    0.39
  13  -9   2    2.74    0.42
 -14   9  -2    3.44    0.39
 -14   9  -2    2.96    0.35
  14  -9   2    4.05    0.47
 -15   9  -2    5.14    0.42
 -15   9  -2    3.51    0.43
  15  -9   2    4.88    0.50
 -16   9  -2    0.09    0.35
  16  -9   2   -0.51    0.36
  13   8  -2    0.45    0.38
 -13  -8   2   -0.29    0.29
 -13  -8   2   -0.56    0.33
  12   8  -2    0.78    0.36
 -12  -8   2    0.97    0.30
 -12  -8   2    0.88    0.35
  11   8  -2    0.45    0.33
 -11  -8   2    0.09    0.27
 -11  -8   2    0.12    0.30
  10   8  -2    2.60    0.37
 -10  -8   2    2.84    0.32
 -10  -8   2    2.72    0.36
   9   8  -2    5.90    0.43
  -9  -8   2    5.99    0.39
  -9  -8   2    5.42    0.42
   8   8  -2    0.13    0.25
  -8  -8   2   -0.13    0.21
  -8  -8   2   -0.07    0.23
   7   8  -2    1.81    0.29
  -7  -8   2    2.34    0.29
  -7  -8   2    2.07    0.25
   6   8  -2    0.17    0.22
  -6  -8   2    0.29    0.18
  -6  -8   2    0.07    0.20
   5   8  -2    0.16    0.21
  -5  -8   2    0.52    0.21
  -5  -8   2    0.39    0.16
   4   8  -2    4.93    0.33
  -4  -8   2    4.93    0.26
  -4  -8   2    4.61    0.32
   3   8  -2    0.15    0.17
  -3  -8   2    0.24    0.17
  -3  -8   2    0.59    0.15
   2   8  -2    9.58    0.40
   2   8  -2   10.73    0.36
  -2  -8   2    9.81    0.37
  -2  -8   2    9.73    0.28
  -2  -8   2   10.58    0.34
   1   8  -2   -0.01    0.11
   1   8  -2    0.04    0.15
  -1  -8   2    0.05    0.09
  -1  -8   2    0.08    0.11
  -1  -8   2   -0.08    0.12
   0   8  -2   37.11    0.84
   0   8  -2   37.40    0.95
   0  -8   2   37.68    0.88
   0  -8   2   37.74    0.85
   0  -8   2   38.77    0.84
  -1   8  -2    3.17    0.19
  -1   8  -2    3.07    0.24
   1  -8   2    2.70    0.18
   1  -8   2    2.96    0.19
   1  -8   2    3.06    0.19
  -2   8  -2    2.74    0.19
  -2   8  -2    2.41    0.21
   2  -8   2    2.25    0.17
   2  -8   2    2.55    0.16
   2  -8   2    2.62    0.18
  -3   8  -2   10.39    0.39
  -3   8  -2   10.46    0.34
   3  -8   2    9.71    0.31
   3  -8   2   10.01    0.34
   3  -8   2   10.06    0.36
  -4   8  -2   40.09    0.88
  -4   8  -2   37.52    0.95
   4  -8   2   37.57    0.86
   4  -8   2   39.11    0.84
   4  -8   2   38.70    0.93
  -5   8  -2    0.17    0.13
  -5   8  -2   -0.10    0.15
   5  -8   2    0.18    0.12
   5  -8   2   -0.10    0.14
   5  -8   2    0.08    0.08
  -6   8  -2    8.00    0.37
  -6   8  -2    8.08    0.24
  -6   8  -2    7.11    0.31
   6  -8   2    7.73    0.32
   6  -8   2    7.38    0.36
  -7   8  -2    7.63    0.32
  -7   8  -2    8.18    0.37
   7  -8   2    7.64    0.41
  -8   8  -2    3.43    0.28
  -8   8  -2    4.31    0.27
   8  -8   2    3.55    0.31
  -9   8  -2    0.14    0.20
  -9   8  -2    0.19    0.17
   9  -8   2   -0.01    0.21
 -10   8  -2    5.67    0.38
 -10   8  -2    5.89    0.33
  10  -8   2    5.77    0.41
 -11   8  -2    0.13    0.20
 -11   8  -2   -0.31    0.23
  11  -8   2   -0.16    0.24
 -12   8  -2   15.67    0.60
 -12   8  -2   15.41    0.57
  12  -8   2   14.75    0.64
 -13   8  -2    0.33    0.27
 -13   8  -2    0.81    0.27
  13  -8   2    0.72    0.32
 -14   8  -2    0.34    0.27
 -14   8  -2    0.31    0.31
  14  -8   2    0.69    0.36
 -15   8  -2   -0.14    0.33
 -15   8  -2   -0.09    0.29
  15  -8   2    0.21    0.37
 -16   8  -2    4.97    0.49
  16  -8   2    6.28    0.58
  14   7  -2    1.10    0.40
 -14  -7   2    1.27    0.42
 -14  -7   2    1.38    0.34
  13   7  -2   -0.28    0.31
 -13  -7   2    0.80    0.38
 -13  -7   2    0.08    0.28
  12   7  -2    0.76    0.33
 -12  -7   2    0.64    0.34
 -12  -7   2    0.54    0.27
  11   7  -2    4.88    0.41
 -11  -7   2    4.44    0.42
 -11  -7   2    4.69    0.36
  10   7  -2    0.14    0.27
 -10  -7   2   -0.26    0.25
 -10  -7   2    0.13    0.22
   9   7  -2    0.44    0.26
  -9  -7   2    0.22    0.25
  -9  -7   2    0.62    0.22
   8   7  -2    6.49    0.44
  -8  -7   2    5.79    0.35
  -8  -7   2    6.09    0.40
   7   7  -2   14.60    0.55
  -7  -7   2   12.94    0.52
  -7  -7   2   13.05    0.44
   6   7  -2    1.04    0.21
  -6  -7   2    0.89    0.18
  -6  -7   2    0.92    0.20
   5   7  -2    5.67    0.33
  -5  -7   2    5.38    0.27
  -5  -7   2    4.97    0.32
   4   7  -2   53.69    1.24
  -4  -7   2   51.84    1.22
  -4  -7   2   52.50    1.14
   3   7  -2    5.96    0.32
   3   7  -2    6.16    0.27
  -3  -7   2    5.71    0.29
  -3  -7   2    6.11    0.17
  -3  -7   2    6.51    0.26
   2   7  -2   67.92    1.52
   2   7  -2   68.72    1.40
  -2  -7   2   66.30    1.48
  -2  -7   2   69.43    1.41
  -2  -7   2   67.86    1.38
   1   7  -2    2.83    0.21
   1   7  -2    2.89    0.19
  -1  -7   2    3.06    0.15
  -1  -7   2    3.30    0.20
  -1  -7   2    2.95    0.20
   0   7  -2   29.56    0.67
   0   7  -2   28.99    0.74
   0  -7   2   29.62    0.67
   0  -7   2   29.46    0.66
   0  -7   2   29.65    0.70
  -1   7  -2    0.12    0.09
  -1   7  -2    0.07    0.12
   1  -7   2    0.35    0.10
   1  -7   2    0.11    0.10
   1  -7   2    0.43    0.10
  -2   7  -2   72.71    1.45
  -2   7  -2   70.58    1.56
   2  -7   2   69.63    1.44
   2  -7   2   70.57    1.48
   2  -7   2   69.95    1.49
  -3   7  -2    0.24    0.12
  -3   7  -2    0.21    0.11
   3  -7   2    0.31    0.09
   3  -7   2    0.13    0.11
   3  -7   2    0.10    0.10
  -4   7  -2   22.19    0.55
  -4   7  -2   21.75    0.60
   4  -7   2   22.99    0.55
   4  -7   2   22.00    0.60
   4  -7   2   22.40    0.51
  -5   7  -2    1.81    0.16
  -5   7  -2    2.10    0.20
   5  -7   2    1.99    0.17
   5  -7   2    1.73    0.19
  -6   7  -2  114.75    2.31
  -6   7  -2  111.95    2.31
  -6   7  -2  113.38    2.44
   6  -7   2  117.87    2.30
   6  -7   2  116.43    2.44
  -7   7  -2    1.13    0.16
  -7   7  -2    0.86    0.17
   7  -7   2    1.12    0.21
  -8   7  -2    7.65    0.39
  -8   7  -2    8.65    0.34
   8  -7   2    8.90    0.41
  -9   7  -2    0.75    0.19
  -9   7  -2    0.65    0.20
   9  -7   2    0.23    0.23
 -10   7  -2   21.65    0.69
 -10   7  -2   23.00    0.64
  10  -7   2   21.95    0.72
 -11   7  -2   12.34    0.53
 -11   7  -2   11.21    0.45
  11  -7   2   11.61    0.54
 -12   7  -2    3.92    0.32
 -12   7  -2    4.11    0.36
  12  -7   2    4.21    0.39
 -13   7  -2    0.65    0.27
 -13   7  -2    0.48    0.25
  13  -7   2    0.58    0.32
 -14   7  -2    1.95    0.31
 -14   7  -2    1.88    0.35
  14  -7   2    2.37    0.41
 -15   7  -2    2.39    0.36
 -15   7  -2    2.19    0.35
  15  -7   2    1.52    0.40
 -16   7  -2    8.40    0.53
 -16   7  -2    7.31    0.55
  16  -7   2    7.12    0.57
 -17   7  -2   -0.18    0.36
  17  -7   2   -0.04    0.37
  14   6  -2    0.03    0.35
 -14  -6   2    0.55    0.37
 -14  -6   2    0.34    0.29
  13   6  -2    1.81    0.38
 -13  -6   2    1.27    0.37
 -13  -6   2    1.51    0.31
  12   6  -2    2.13    0.37
 -12  -6   2    2.58    0.31
 -12  -6   2    2.59    0.39
  11   6  -2    5.71    0.43
 -11  -6   2    5.76    0.37
 -11  -6   2    5.49    0.43
  10   6  -2    0.10    0.26
 -10  -6   2    0.26    0.22
 -10  -6   2   -0.05    0.25
   9   6  -2   16.52    0.60
  -9  -6   2   17.66    0.64
  -9  -6   2   15.87    0.52
   8   6  -2    0.26    0.20
  -8  -6   2    0.17    0.20
  -8  -6   2    0.39    0.18
   7   6  -2    5.84    0.38
  -7  -6   2    6.64    0.37
  -7  -6   2    6.19    0.29
  -6  -6   2   23.68    0.60
  -6  -6   2   23.26    0.67
   5   6  -2   18.54    0.55
  -5  -6   2   18.21    0.49
  -5  -6   2   17.98    0.55
   4   6  -2    0.92    0.12
   4   6  -2    0.73    0.16
  -4  -6   2    0.84    0.16
  -4  -6   2    0.70    0.13
   3   6  -2    9.66    0.35
   3   6  -2    9.32    0.29
  -3  -6   2    9.44    0.34
  -3  -6   2    9.19    0.31
  -3  -6   2    9.26    0.21
   2   6  -2   53.24    1.12
   2   6  -2   53.53    1.21
  -2  -6   2   53.46    1.09
  -2  -6   2   53.29    1.19
  -2  -6   2   55.83    1.13
   1   6  -2    2.40    0.18
   1   6  -2    2.72    0.16
  -1  -6   2    2.82    0.18
  -1  -6   2    2.72    0.16
  -1  -6   2    2.81    0.14
   0   6  -2   35.15    0.74
   0   6  -2   33.14    0.81
   0  -6   2   33.43    0.74
   0  -6   2   33.47    0.77
   0  -6   2   35.39    0.75
  -1   6  -2   38.70    0.91
  -1   6  -2   38.68    0.84
   1  -6   2   39.58    0.86
   1  -6   2   38.28    0.85
   1  -6   2   39.90    0.83
  -2   6  -2   10.95    0.31
  -2   6  -2   10.47    0.36
   2  -6   2   11.62    0.31
   2  -6   2   10.96    0.33
   2  -6   2   11.49    0.32
  -3   6  -2    0.06    0.11
  -3   6  -2    0.05    0.08
   3  -6   2    0.04    0.07
   3  -6   2   -0.08    0.08
   3  -6   2   -0.05    0.10
  -4   6  -2   17.51    0.44
  -4   6  -2   16.58    0.47
   4  -6   2   16.78    0.39
   4  -6   2   16.70    0.44
   4  -6   2   17.16    0.47
  -5   6  -2    0.04    0.10
  -5   6  -2   -0.03    0.11
  -5   6  -2    0.00    0.06
   5  -6   2   -0.02    0.09
   5  -6   2    0.01    0.11
  -6   6  -2   35.86    0.81
  -6   6  -2   35.04    0.87
  -6   6  -2   36.29    0.76
   6  -6   2   36.15    0.81
  -7   6  -2    2.56    0.20
  -7   6  -2    2.43    0.16
  -7   6  -2    2.17    0.21
   7  -6   2    2.60    0.24
   7  -6   2    2.64    0.19
  -8   6  -2   85.73    1.76
  -8   6  -2   81.11    1.74
  -8   6  -2   85.11    1.86
   8  -6   2   87.66    1.89
  -9   6  -2    0.33    0.19
  -9   6  -2    1.02    0.17
   9  -6   2    0.69    0.22
 -10   6  -2   28.11    0.76
 -10   6  -2   29.74    0.81
  10  -6   2   31.19    0.88
 -11   6  -2    0.47    0.23
 -11   6  -2    0.26    0.19
  11  -6   2    0.17    0.25
 -12   6  -2   23.38    0.69
 -12   6  -2   23.97    0.75
  12  -6   2   21.21    0.76
 -13   6  -2    8.25    0.46
 -13   6  -2    9.11    0.44
  13  -6   2    8.47    0.51
 -14   6  -2    0.77    0.31
 -14   6  -2    1.00    0.29
  14  -6   2    0.83    0.32
 -15   6  -2    0.58    0.30
 -15   6  -2    0.54    0.33
  15  -6   2   -0.21    0.34
 -16   6  -2    1.46    0.33
 -16   6  -2    1.74    0.39
  16  -6   2    0.65    0.39
 -17   6  -2    8.35    0.59
  17  -6   2    7.65    0.59
  15   5  -2    1.26    0.38
 -15  -5   2    1.54    0.34
 -15  -5   2    1.13    0.40
  14   5  -2   -0.36    0.32
 -14  -5   2   -0.44    0.31
 -14  -5   2    0.12    0.28
  13   5  -2   -0.33    0.28
 -13  -5   2    0.23    0.27
 -13  -5   2    0.41    0.32
  12   5  -2    1.46    0.32
 -12  -5   2    1.63    0.27
 -12  -5   2    1.13    0.32
  11   5  -2    1.49    0.29
 -11  -5   2    1.72    0.32
 -11  -5   2    2.49    0.28
  10   5  -2   12.98    0.56
 -10  -5   2   13.23    0.48
 -10  -5   2   13.24    0.55
   9   5  -2   22.58    0.69
  -9  -5   2   23.54    0.64
  -9  -5   2   22.17    0.71
   8   5  -2   10.07    0.43
  -8  -5   2    9.45    0.46
  -8  -5   2    9.86    0.38
   7   5  -2    0.01    0.17
  -7  -5   2    0.10    0.16
  -7  -5   2    0.23    0.15
   6   5  -2   22.59    0.62
  -6  -5   2   22.01    0.56
  -6  -5   2   21.10    0.62
   5   5  -2   13.37    0.43
  -5  -5   2   13.68    0.45
  -5  -5   2   12.67    0.37
   4   5  -2   12.21    0.34
   4   5  -2   12.16    0.39
  -4  -5   2   12.10    0.35
  -4  -5   2   11.64    0.39
   3   5  -2   11.74    0.37
   3   5  -2   11.71    0.32
  -3  -5   2   11.45    0.32
  -3  -5   2   11.25    0.36
   2   5  -2   82.30    1.76
   2   5  -2   82.45    1.64
  -2  -5   2   83.31    1.64
  -2  -5   2   81.63    1.74
  -2  -5   2   83.53    1.65
   1   5  -2    0.35    0.11
   1   5  -2    0.37    0.08
  -1  -5   2    0.43    0.09
  -1  -5   2    0.43    0.09
  -1  -5   2    0.42    0.06
   0   5  -2   95.52    1.83
   0   5  -2   91.79    1.94
   0  -5   2   93.08    1.90
   0  -5   2   91.25    1.82
   0  -5   2   91.93    1.86
  -1   5  -2    1.09    0.12
   1  -5   2    1.35    0.10
   1  -5   2    1.26    0.10
  -2   5  -2   61.33    1.30
  -2   5  -2   59.48    1.22
   2  -5   2   59.53    1.24
   2  -5   2   59.32    1.26
   2  -5   2   61.37    1.22
  -3   5  -2    0.02    0.08
  -3   5  -2    0.05    0.09
   3  -5   2    0.00    0.08
   3  -5   2    0.03    0.07
   3  -5   2    0.12    0.06
  -4   5  -2   83.89    1.70
  -4   5  -2   83.36    1.80
  -4   5  -2   86.87    1.73
   4  -5   2   86.36    1.79
   4  -5   2   86.09    1.70
  -5   5  -2    0.02    0.09
  -5   5  -2   -0.06    0.10
  -5   5  -2    0.08    0.06
   5  -5   2    0.03    0.11
   5  -5   2    0.04    0.08
  -6   5  -2   28.41    0.70
  -6   5  -2   29.05    0.66
  -6   5  -2   27.51    0.62
   6  -5   2   27.17    0.72
   6  -5   2   28.79    0.65
  -7   5  -2    8.59    0.27
  -7   5  -2    8.80    0.36
  -7   5  -2    9.04    0.31
   7  -5   2   10.02    0.40
   7  -5   2    9.16    0.31
  -8   5  -2   76.42    1.66
  -8   5  -2   72.59    1.57
  -8   5  -2   74.77    1.57
   8  -5   2   77.29    1.69
  -9   5  -2   -0.01    0.16
  -9   5  -2    0.00    0.11
  -9   5  -2    0.16    0.15
   9  -5   2    0.13    0.19
 -10   5  -2    0.78    0.20
 -10   5  -2    1.20    0.20
  10  -5   2    0.92    0.23
 -11   5  -2    7.38    0.41
 -11   5  -2    7.20    0.37
  11  -5   2    7.01    0.46
 -12   5  -2   21.90    0.71
 -12   5  -2   21.40    0.64
  12  -5   2   20.76    0.75
 -13   5  -2    1.35    0.26
 -13   5  -2    1.71    0.31
  13  -5   2    1.55    0.33
 -14   5  -2    4.43    0.39
 -14   5  -2    4.49    0.37
  14  -5   2    4.54    0.45
 -15   5  -2    5.81    0.43
 -15   5  -2    5.23    0.45
  15  -5   2    5.70    0.49
 -16   5  -2    2.59    0.38
 -16   5  -2    1.70    0.33
  16  -5   2    1.43    0.37
 -17   5  -2    1.24    0.40
  17  -5   2    0.75    0.40
  15   4  -2    1.99    0.41
 -15  -4   2    2.71    0.43
 -15  -4   2    2.07    0.34
  14   4  -2   -0.17    0.32
 -14  -4   2    0.01    0.32
 -14  -4   2    0.33    0.28
  13   4  -2    0.04    0.28
 -13  -4   2    0.08    0.27
 -13  -4   2   -0.08    0.25
  12   4  -2    2.12    0.33
 -12  -4   2    1.84    0.28
 -12  -4   2    1.95    0.33
  11   4  -2   10.10    0.49
 -11  -4   2    9.96    0.44
 -11  -4   2   10.34    0.53
  10   4  -2    0.79    0.25
 -10  -4   2    0.89    0.23
 -10  -4   2    0.81    0.19
   9   4  -2    1.00    0.21
  -9  -4   2    1.04    0.22
  -9  -4   2    1.30    0.19
   8   4  -2    0.23    0.17
  -8  -4   2    0.28    0.17
  -8  -4   2    0.09    0.14
   7   4  -2    7.56    0.22
   7   4  -2    7.46    0.37
  -7  -4   2    7.29    0.30
  -7  -4   2    7.74    0.36
   6   4  -2    0.21    0.13
   6   4  -2    0.21    0.06
  -6  -4   2    0.20    0.11
  -6  -4   2    0.27    0.13
   5   4  -2    0.15    0.12
   5   4  -2    0.14    0.05
  -5  -4   2    0.26    0.10
  -5  -4   2    0.17    0.12
   4   4  -2    0.14    0.11
  -4  -4   2    0.24    0.11
  -4  -4   2    0.35    0.10
   3   4  -2    0.85    0.11
   3   4  -2    1.03    0.10
  -3  -4   2    0.93    0.12
  -3  -4   2    0.82    0.09
   2   4  -2   60.85    1.30
   2   4  -2   61.50    1.21
  -2  -4   2   61.77    1.22
  -2  -4   2   60.47    1.29
  -2  -4   2   59.38    1.20
   1   4  -2    3.26    0.17
   1   4  -2    3.66    0.15
  -1  -4   2    3.33    0.14
  -1  -4   2    3.44    0.11
  -1  -4   2    3.08    0.17
   0   4  -2    5.68    0.21
   0   4  -2    6.10    0.19
   0  -4   2    6.30    0.18
   0  -4   2    6.44    0.20
   0  -4   2    6.25    0.18
  -1   4  -2    4.84    0.17
  -1   4  -2    4.31    0.20
   1  -4   2    4.80    0.16
   1  -4   2    4.57    0.17
   1  -4   2    4.57    0.16
  -2   4  -2   86.17    1.80
  -2   4  -2   84.17    1.70
   2  -4   2   84.54    1.76
   2  -4   2   88.99    1.70
   2  -4   2   88.22    1.75
  -3   4  -2   -0.11    0.06
  -3   4  -2   -0.08    0.07
   3  -4   2   -0.02    0.06
   3  -4   2   -0.19    0.07
   3  -4   2   -0.06    0.05
  -4   4  -2    4.72    0.16
  -4   4  -2    4.98    0.19
  -4   4  -2    4.49    0.21
   4  -4   2    4.98    0.18
   4  -4   2    4.56    0.21
  -5   4  -2    0.55    0.11
  -5   4  -2    0.76    0.08
  -5   4  -2    0.58    0.10
   5  -4   2    0.81    0.10
   5  -4   2    0.48    0.12
  -6   4  -2   60.19    1.24
  -6   4  -2   59.40    1.25
  -6   4  -2   60.83    1.32
   6  -4   2   59.76    1.23
   6  -4   2   59.37    1.33
  -7   4  -2    0.01    0.11
  -7   4  -2    0.14    0.13
  -7   4  -2    0.04    0.09
   7  -4   2    0.17    0.10
   7  -4   2   -0.11    0.13
  -8   4  -2   31.27    0.73
  -8   4  -2   30.97    0.79
  -8   4  -2   31.62    0.75
   8  -4   2   31.18    0.82
  -9   4  -2   12.91    0.46
  -9   4  -2   13.27    0.42
  -9   4  -2   13.22    0.41
   9  -4   2   11.96    0.47
 -10   4  -2   39.42    0.94
 -10   4  -2   39.80    0.98
 -10   4  -2   38.95    0.93
  10  -4   2   39.13    1.02
 -11   4  -2   -0.07    0.18
 -11   4  -2   -0.17    0.20
  11  -4   2    0.06    0.21
 -12   4  -2    0.58    0.21
 -12   4  -2    1.16    0.26
  12  -4   2    0.56    0.27
 -13   4  -2   12.85    0.55
 -13   4  -2   12.10    0.49
  13  -4   2   12.15    0.59
 -14   4  -2   25.34    0.82
 -14   4  -2   23.51    0.74
  14  -4   2   24.53    0.85
 -15   4  -2    0.96    0.34
  15  -4   2    0.78    0.32
 -16   4  -2    0.89    0.33
 -16   4  -2    1.33    0.37
  16  -4   2    0.64    0.37
 -17   4  -2    4.70    0.49
  16   3  -2    1.37    0.42
 -16  -3   2    0.89    0.34
  15   3  -2    0.59    0.36
 -15  -3   2    0.61    0.35
 -15  -3   2    0.47    0.30
  14   3  -2    2.67    0.39
 -14  -3   2    2.22    0.33
 -14  -3   2    1.91    0.37
  13   3  -2    3.64    0.38
 -13  -3   2    3.50    0.38
 -13  -3   2    3.93    0.33
  12   3  -2    0.22    0.27
 -12  -3   2    0.27    0.25
 -12  -3   2    0.01    0.22
  11   3  -2    0.26    0.23
 -11  -3   2    0.50    0.21
 -11  -3   2    0.63    0.22
  10   3  -2   18.93    0.63
 -10  -3   2   18.52    0.63
 -10  -3   2   17.83    0.54
   9   3  -2   18.68    0.61
  -9  -3   2   19.72    0.60
  -9  -3   2   18.02    0.53
   8   3  -2    3.16    0.25
   8   3  -2    3.07    0.18
  -8  -3   2    2.98    0.22
  -8  -3   2    3.36    0.25
   7   3  -2   -0.12    0.14
   7   3  -2    0.04    0.08
  -7  -3   2    0.17    0.14
  -7  -3   2   -0.09    0.11
   6   3  -2   16.64    0.48
   6   3  -2   16.62    0.39
  -6  -3   2   16.91    0.48
  -6  -3   2   16.98    0.43
   5   3  -2   33.50    0.79
   5   3  -2   33.40    0.69
  -5  -3   2   32.97    0.79
  -5  -3   2   33.03    0.72
   4   3  -2    3.31    0.19
   4   3  -2    3.21    0.10
  -4  -3   2    3.38    0.16
  -4  -3   2    3.33    0.19
   3   3  -2   27.04    0.62
  -3  -3   2   27.47    0.62
  -3  -3   2   25.67    0.57
   2   3  -2    0.84    0.09
  -2  -3   2    0.60    0.08
  -2  -3   2    0.60    0.07
   1   3  -2    8.70    0.25
   1   3  -2    8.80    0.23
  -1  -3   2    8.98    0.21
  -1  -3   2    9.54    0.26
  -1  -3   2    9.54    0.23
   0   3  -2   80.58    1.69
   0  -3   2   83.57    1.59
   0  -3   2   80.70    1.64
   0  -3   2   83.96    1.67
  -1   3  -2   10.73    0.26
  -1   3  -2   11.04    0.29
   1  -3   2   10.70    0.27
   1  -3   2   10.91    0.26
  -2   3  -2   25.91    0.53
  -2   3  -2   23.95    0.56
   2  -3   2   25.36    0.53
   2  -3   2   24.84    0.53
   2  -3   2   24.54    0.56
  -3   3  -2    0.04    0.06
  -3   3  -2    0.18    0.05
  -3   3  -2    0.10    0.06
   3  -3   2    0.12    0.06
   3  -3   2    0.05    0.07
  -4   3  -2   17.69    0.41
  -4   3  -2   17.57    0.43
  -4   3  -2   17.27    0.39
   4  -3   2   17.42    0.41
   4  -3   2   16.46    0.45
  -5   3  -2   13.88    0.35
  -5   3  -2   13.52    0.38
  -5   3  -2   14.57    0.36
   5  -3   2   13.79    0.41
   5  -3   2   14.26    0.36
  -6   3  -2    9.92    0.33
  -6   3  -2    9.96    0.30
  -6   3  -2    9.87    0.30
   6  -3   2    9.84    0.35
   6  -3   2   10.19    0.30
  -7   3  -2    0.86    0.14
  -7   3  -2    0.77    0.12
  -7   3  -2    0.77    0.13
   7  -3   2    0.96    0.13
   7  -3   2    0.98    0.16
  -8   3  -2   16.02    0.49
  -8   3  -2   15.98    0.46
  -8   3  -2   16.29    0.45
   8  -3   2   15.95    0.51
   8  -3   2   16.36    0.44
  -9   3  -2    0.21    0.15
  -9   3  -2   -0.15    0.12
  -9   3  -2    0.21    0.13
   9  -3   2    0.11    0.16
 -10   3  -2    4.43    0.30
 -10   3  -2    5.03    0.28
 -10   3  -2    4.47    0.31
  10  -3   2    4.48    0.33
 -11   3  -2    2.01    0.24
 -11   3  -2    1.97    0.22
 -11   3  -2    2.22    0.26
  11  -3   2    2.05    0.27
 -12   3  -2    3.15    0.31
 -12   3  -2    2.81    0.26
  12  -3   2    2.45    0.30
 -13   3  -2    0.04    0.26
 -13   3  -2    0.04    0.21
  13  -3   2    0.35    0.27
 -14   3  -2    0.61    0.26
 -14   3  -2    0.35    0.29
  14  -3   2    0.42    0.30
 -15   3  -2    6.96    0.46
 -15   3  -2    7.58    0.51
  15  -3   2    5.76    0.46
 -16   3  -2    0.86    0.34
 -16   3  -2    0.48    0.34
  16   2  -2    0.98    0.40
 -16  -2   2    0.31    0.31
  15   2  -2    0.53    0.33
 -15  -2   2    0.75    0.28
  14   2  -2    0.60    0.32
 -14  -2   2    0.33    0.29
 -14  -2   2    0.24    0.26
  13   2  -2    0.32    0.29
 -13  -2   2    0.27    0.24
 -13  -2   2    0.18    0.22
  12   2  -2    5.99    0.42
 -12  -2   2    6.09    0.41
 -12  -2   2    6.72    0.35
  11   2  -2    3.16    0.31
 -11  -2   2    2.62    0.25
 -11  -2   2    2.88    0.28
  10   2  -2    1.95    0.26
 -10  -2   2    2.28    0.26
 -10  -2   2    1.70    0.21
 -10  -2   2    1.92    0.25
   9   2  -2    0.54    0.14
  -9  -2   2    1.08    0.21
  -9  -2   2    0.75    0.16
  -9  -2   2    0.67    0.17
   8   2  -2   10.56    0.33
  -8  -2   2    9.52    0.38
  -8  -2   2   10.41    0.41
  -8  -2   2    9.54    0.33
   7   2  -2   30.72    0.70
  -7  -2   2   31.00    0.77
  -7  -2   2   31.45    0.77
  -7  -2   2   30.53    0.70
   6   2  -2    0.65    0.09
  -6  -2   2    0.55    0.10
  -6  -2   2    0.74    0.14
  -6  -2   2    0.57    0.12
   5   2  -2   14.58    0.35
   5   2  -2   14.43    0.41
  -5  -2   2   14.50    0.36
  -5  -2   2   15.04    0.42
  -5  -2   2   14.90    0.41
   4   2  -2  122.73    2.43
   4   2  -2  120.95    2.53
  -4  -2   2  123.73    2.51
  -4  -2   2  123.89    2.38
   3   2  -2    8.65    0.26
   3   2  -2    9.14    0.20
  -3  -2   2    9.52    0.23
   2   2  -2   29.61    0.65
  -2  -2   2   28.92    0.64
  -2  -2   2   29.41    0.59
   1   2  -2    0.21    0.05
  -1  -2   2    0.20    0.05
  -1  -2   2    0.18    0.04
  -1  -2   2    0.23    0.02
   0   2  -2  670.50   13.88
   0   2  -2  696.26   13.12
   0  -2   2  713.08   13.68
   0  -2   2  654.01   13.59
   0  -2   2  706.43   13.09
  -1   2  -2    0.91    0.08
  -1   2  -2    0.72    0.07
   1  -2   2    0.96    0.08
   1  -2   2    0.91    0.07
   1  -2   2    0.85    0.07
  -2   2  -2    4.97    0.16
  -2   2  -2    4.96    0.14
   2  -2   2    4.82    0.17
  -3   2  -2    0.33    0.06
  -3   2  -2    0.42    0.07
  -3   2  -2    0.33    0.06
   3  -2   2    0.28    0.08
   3  -2   2    0.23    0.06
  -4   2  -2    1.92    0.12
  -4   2  -2    1.89    0.12
  -4   2  -2    1.76    0.11
   4  -2   2    1.99    0.14
   4  -2   2    1.95    0.12
  -5   2  -2   12.17    0.32
  -5   2  -2   12.15    0.33
  -5   2  -2   11.79    0.32
   5  -2   2   12.61    0.37
   5  -2   2   12.33    0.32
  -6   2  -2  256.46    4.96
  -6   2  -2  260.49    5.23
  -6   2  -2  256.95    5.17
   6  -2   2  262.51    4.96
   6  -2   2  255.00    5.18
  -7   2  -2    6.75    0.27
  -7   2  -2    7.14    0.27
  -7   2  -2    7.40    0.29
   7  -2   2    7.15    0.32
   7  -2   2    6.98    0.26
  -8   2  -2    0.00    0.12
  -8   2  -2    0.11    0.14
  -8   2  -2   -0.10    0.11
   8  -2   2    0.18    0.11
   8  -2   2    0.10    0.15
  -9   2  -2   12.94    0.42
  -9   2  -2   12.85    0.45
  -9   2  -2   12.22    0.43
   9  -2   2   13.80    0.48
 -10   2  -2    7.53    0.35
 -10   2  -2    7.58    0.36
 -10   2  -2    8.18    0.36
  10  -2   2    7.82    0.38
 -11   2  -2    2.56    0.27
 -11   2  -2    2.02    0.24
 -11   2  -2    2.07    0.23
  11  -2   2    2.01    0.27
 -12   2  -2    0.60    0.22
 -12   2  -2    1.16    0.26
 -12   2  -2    0.81    0.22
  12  -2   2    1.01    0.24
 -13   2  -2    5.14    0.36
 -13   2  -2    4.96    0.38
  13  -2   2    5.03    0.39
 -14   2  -2    4.25    0.36
 -14   2  -2    4.76    0.41
  14  -2   2    4.77    0.40
 -15   2  -2    2.59    0.38
 -15   2  -2    2.59    0.34
  15  -2   2    2.21    0.35
 -16   2  -2    1.07    0.34
 -16   2  -2    0.90    0.36
  16   1  -2    0.08    0.36
 -16  -1   2    0.67    0.32
  15   1  -2    0.55    0.34
 -15  -1   2    0.54    0.28
  14   1  -2    0.33    0.31
 -14  -1   2    0.38    0.24
 -14  -1   2    0.78    0.28
 -13  -1   2    9.10    0.49
 -13  -1   2    8.62    0.41
 -13  -1   2    8.45    0.48
 -12  -1   2   12.19    0.53
 -12  -1   2   12.35    0.55
 -12  -1   2   11.97    0.45
 -11  -1   2    0.41    0.20
 -11  -1   2    0.70    0.18
 -11  -1   2    0.43    0.24
  10   1  -2    4.77    0.30
 -10  -1   2    5.29    0.29
 -10  -1   2    4.97    0.34
 -10  -1   2    5.23    0.34
   9   1  -2    0.31    0.14
  -9  -1   2    0.08    0.13
  -9  -1   2    0.32    0.15
  -9  -1   2    0.23    0.17
   8   1  -2   10.99    0.36
  -8  -1   2   11.79    0.42
  -8  -1   2   11.21    0.35
  -8  -1   2   11.43    0.39
   7   1  -2    0.65    0.12
  -7  -1   2    0.64    0.14
  -7  -1   2    0.48    0.11
  -7  -1   2    0.47    0.12
   6   1  -2    4.67    0.20
  -6  -1   2    4.94    0.24
  -6  -1   2    4.57    0.23
  -6  -1   2    4.53    0.19
   5   1  -2    1.85    0.11
  -5  -1   2    1.62    0.12
  -5  -1   2    1.53    0.10
  -5  -1   2    1.62    0.10
  -5  -1   2    1.35    0.13
   4   1  -2    0.91    0.07
  -4  -1   2    0.93    0.07
  -4  -1   2    0.83    0.10
  -4  -1   2    0.95    0.07
  -4  -1   2    0.77    0.09
   3   1  -2    1.69    0.08
  -3  -1   2    1.54    0.11
  -3  -1   2    1.62    0.08
  -3  -1   2    1.75    0.11
  -3  -1   2    1.64    0.08
   2   1  -2   20.05    0.41
  -2  -1   2   20.45    0.45
  -2  -1   2   19.80    0.40
  -2  -1   2   20.34    0.45
  -2  -1   2   20.05    0.41
   1   1  -2   21.47    0.46
  -1  -1   2   21.04    0.43
  -1  -1   2   21.56    0.42
  -1  -1   2   21.93    0.42
  -1  -1   2   20.93    0.46
   0   1  -2    7.26    0.17
   0  -1   2    7.22    0.18
   0  -1   2    6.85    0.17
   0  -1   2    7.46    0.16
  -1   1  -2    0.11    0.03
  -1   1  -2    0.11    0.03
   1  -1   2    0.17    0.04
   1  -1   2    0.15    0.04
   1  -1   2    0.15    0.04
  -2   1  -2   59.12    1.20
  -2   1  -2   58.31    1.19
  -2   1  -2   57.22    1.15
   2  -1   2   59.84    1.15
   2  -1   2   57.42    1.20
  -3   1  -2    2.30    0.11
  -3   1  -2    2.28    0.11
  -3   1  -2    2.16    0.12
   3  -1   2    2.23    0.11
  -4   1  -2   35.48    0.76
  -4   1  -2   34.36    0.75
  -4   1  -2   34.33    0.73
   4  -1   2   34.24    0.72
   4  -1   2   34.62    0.77
  -5   1  -2    8.95    0.27
  -5   1  -2    8.65    0.26
  -5   1  -2    9.11    0.27
   5  -1   2    8.68    0.25
   5  -1   2    8.75    0.30
  -6   1  -2    4.52    0.20
  -6   1  -2    4.45    0.22
  -6   1  -2    4.18    0.21
   6  -1   2    4.60    0.20
   6  -1   2    4.57    0.24
  -7   1  -2   22.13    0.56
  -7   1  -2   22.15    0.58
  -7   1  -2   22.29    0.54
   7  -1   2   21.82    0.58
   7  -1   2   21.77    0.53
  -8   1  -2    1.05    0.14
  -8   1  -2    1.07    0.16
  -8   1  -2    0.99    0.16
   8  -1   2    1.09    0.13
   8  -1   2    0.89    0.17
  -9   1  -2   41.90    0.96
  -9   1  -2   42.33    1.02
  -9   1  -2   42.61    1.02
   9  -1   2   43.36    1.02
 -10   1  -2   14.52    0.49
 -10   1  -2   13.27    0.45
 -10   1  -2   13.44    0.49
  10  -1   2   14.34    0.49
 -11   1  -2    6.05    0.37
 -11   1  -2    5.46    0.34
 -11   1  -2    5.98    0.38
  11  -1   2    5.56    0.34
 -12   1  -2    8.87    0.46
 -12   1  -2    9.88    0.44
 -12   1  -2    9.82    0.48
  12  -1   2   10.57    0.48
 -13   1  -2   13.97    0.57
 -13   1  -2   13.84    0.52
 -13   1  -2   12.95    0.56
  13  -1   2   14.39    0.57
 -14   1  -2    0.22    0.25
 -14   1  -2   -0.05    0.28
  14  -1   2    0.36    0.27
 -15   1  -2    1.79    0.32
 -15   1  -2    3.04    0.39
 -16   1  -2    1.01    0.34
 -16   1  -2    0.54    0.37
  17   0  -2    1.45    0.43
 -17   0   2    2.27    0.37
  16   0  -2    0.61    0.36
 -16   0   2    0.03    0.29
 -16   0   2    0.62    0.35
 -15   0   2    5.79    0.48
 -15   0   2    5.73    0.41
 -14   0   2    0.10    0.31
 -14   0   2    0.38    0.25
 -13   0   2    4.72    0.34
 -13   0   2    4.03    0.34
 -13   0   2    4.41    0.39
  12   0  -2    3.36    0.30
 -12   0   2    3.75    0.31
 -12   0   2    3.69    0.35
 -12   0   2    3.17    0.28
  11   0  -2    6.04    0.34
 -11   0   2    5.70    0.32
 -11   0   2    5.98    0.39
 -11   0   2    6.56    0.36
  10   0  -2    9.54    0.38
 -10   0   2    9.46    0.36
 -10   0   2    9.47    0.44
 -10   0   2    9.60    0.39
   9   0  -2    0.32    0.15
  -9   0   2    0.04    0.16
  -9   0   2    0.04    0.13
  -9   0   2    0.15    0.14
   8   0  -2   13.77    0.42
  -8   0   2   13.71    0.42
  -8   0   2   13.83    0.45
  -8   0   2   13.76    0.38
   7   0  -2   42.75    0.94
  -7   0   2   42.73    0.90
  -7   0   2   40.95    0.98
  -7   0   2   42.66    0.95
   6   0  -2   45.27    0.99
  -6   0   2   45.65    1.03
  -6   0   2   45.92    0.94
  -6   0   2   46.14    0.94
  -6   0   2   45.30    1.00
   5   0  -2    1.75    0.12
  -5   0   2    1.61    0.11
  -5   0   2    1.66    0.13
  -5   0   2    1.70    0.11
  -5   0   2    1.57    0.10
   4   0  -2   42.17    0.88
  -4   0   2   42.91    0.84
  -4   0   2   41.53    0.89
  -4   0   2   41.21    0.84
   3   0  -2   35.97    0.73
  -3   0   2   34.48    0.69
  -3   0   2   35.16    0.69
  -3   0   2   35.12    0.76
  -3   0   2   35.69    0.74
   2   0  -2  260.07    5.17
  -2   0   2  260.34    5.23
  -2   0   2  262.42    4.97
  -2   0   2  263.98    5.18
  -2   0   2  261.18    4.97
  -1   0   2    1.94    0.07
  -1   0   2    1.98    0.07
  -1   0   2    1.91    0.07
   0   0   2   -0.89    0.04
   0   0   2   -0.83    0.03
   0   0   2   -0.84    0.03
   0   0   2   -0.86    0.04
   0   0   2   -0.90    0.03
  -1   0  -2    0.31    0.04
  -1   0  -2    0.27    0.03
  -1   0  -2    0.28    0.04
   1   0   2    0.35    0.04
  -2   0  -2   40.15    0.79
  -2   0  -2   38.48    0.83
  -2   0  -2   40.02    0.81
   2   0   2   40.22    0.83
   2   0   2   39.36    0.79
  -3   0  -2    6.74    0.21
  -3   0  -2    6.92    0.19
  -3   0  -2    7.20    0.19
   3   0   2    6.92    0.19
   3   0   2    7.28    0.21
  -4   0  -2   33.24    0.74
  -4   0  -2   33.69    0.73
   4   0   2   33.68    0.74
   4   0   2   33.45    0.70
  -5   0  -2    3.38    0.17
  -5   0  -2    3.37    0.18
  -5   0  -2    3.60    0.17
   5   0   2    3.61    0.17
   5   0   2    3.25    0.17
  -6   0  -2   20.07    0.53
  -6   0  -2   20.77    0.51
  -6   0  -2   20.10    0.49
   6   0   2   20.35    0.48
   6   0   2   20.02    0.52
  -7   0  -2    2.47    0.17
  -7   0  -2    2.43    0.18
  -7   0  -2    2.47    0.19
   7   0   2    2.34    0.18
   7   0   2    2.59    0.17
  -8   0  -2    6.05    0.26
  -8   0  -2    6.06    0.29
  -8   0  -2    5.44    0.32
   8   0   2    5.99    0.28
  -9   0  -2    8.50    0.37
  -9   0  -2    9.36    0.40
  -9   0  -2    9.22    0.35
   9   0   2    8.21    0.35
 -10   0  -2    6.23    0.31
 -10   0  -2    6.42    0.35
 -10   0  -2    6.21    0.37
  10   0   2    6.64    0.35
 -11   0  -2    2.04    0.26
 -11   0  -2    1.61    0.22
 -11   0  -2    1.60    0.25
  11   0   2    1.28    0.23
 -12   0  -2   11.37    0.53
 -12   0  -2   11.95    0.47
 -12   0  -2   11.94    0.48
  12   0   2   12.35    0.49
 -13   0  -2    0.18    0.25
 -13   0  -2    0.05    0.22
 -13   0  -2    0.07    0.26
  13   0   2   -0.10    0.23
 -14   0  -2    1.03    0.29
 -14   0  -2    0.93    0.31
 -14   0  -2    0.91    0.30
 -15   0  -2    5.99    0.44
  15   0   2    6.14    0.47
 -16   0  -2    0.78    0.32
  16   0   2    1.04    0.36
 -17   1   2    2.32    0.38
 -17   1   2    2.33    0.45
 -16   1   2    0.85    0.29
 -16   1   2    0.71    0.35
 -15   1   2    1.36    0.35
 -15   1   2    0.92    0.29
 -14   1   2    3.06    0.38
 -14   1   2    2.26    0.29
  13  -1  -2   16.82    0.59
 -13   1   2   14.74    0.53
 -13   1   2   15.29    0.60
  12  -1  -2    0.38    0.21
 -12   1   2    0.32    0.18
 -12   1   2    0.38    0.19
 -12   1   2   -0.02    0.22
  11  -1  -2    0.71    0.21
 -11   1   2    0.71    0.18
 -11   1   2    0.45    0.17
 -11   1   2    0.60    0.23
  10  -1  -2   10.10    0.40
 -10   1   2    9.64    0.38
 -10   1   2    9.72    0.36
 -10   1   2    9.28    0.43
   9  -1  -2    1.49    0.19
  -9   1   2    1.41    0.21
  -9   1   2    1.50    0.17
  -9   1   2    2.01    0.18
   8  -1  -2    2.20    0.19
  -8   1   2    2.36    0.22
  -8   1   2    2.25    0.16
  -8   1   2    2.39    0.17
   7  -1  -2    0.65    0.13
  -7   1   2    0.60    0.11
  -7   1   2    0.59    0.13
  -7   1   2    0.40    0.09
   6  -1  -2  148.82    3.00
  -6   1   2  145.19    2.99
  -6   1   2  148.60    3.06
  -6   1   2  146.08    2.87
  -6   1   2  152.93    2.87
   5  -1  -2    1.19    0.11
  -5   1   2    0.90    0.08
  -5   1   2    0.90    0.11
  -5   1   2    0.95    0.09
  -5   1   2    1.02    0.08
   4  -1  -2   40.49    0.87
  -4   1   2   40.55    0.82
  -4   1   2   41.86    0.82
  -4   1   2   41.21    0.86
  -4   1   2   42.18    0.90
   3  -1  -2   71.44    1.43
  -3   1   2   70.41    1.36
  -3   1   2   71.24    1.42
  -3   1   2   69.85    1.35
  -3   1   2   69.77    1.46
   2  -1  -2   48.69    0.98
  -2   1   2   48.02    0.92
  -2   1   2   47.48    0.97
  -2   1   2   46.67    1.00
  -2   1   2   47.69    0.92
  -1   1   2    3.17    0.10
  -1   1   2    3.09    0.10
  -1   1   2    3.14    0.07
  -1   1   2    2.92    0.09
  -1   1   2    3.14    0.07
   0  -1  -2   27.59    0.57
   0   1   2   27.37    0.57
   0   1   2   27.75    0.54
   0   1   2   27.17    0.57
  -1  -1  -2   19.24    0.42
  -1  -1  -2   19.47    0.40
   1   1   2   19.44    0.40
   1   1   2   18.89    0.40
  -2  -1  -2   50.13    0.99
  -2  -1  -2   48.73    1.05
   2   1   2   50.92    1.03
   2   1   2   49.42    0.99
   2   1   2   51.29    1.03
  -3  -1  -2    0.13    0.06
  -3  -1  -2    0.10    0.06
  -3  -1  -2    0.03    0.05
   3   1   2    0.14    0.06
   3   1   2    0.02    0.05
  -4  -1  -2   10.69    0.29
  -4  -1  -2   10.73    0.32
  -4  -1  -2   10.70    0.29
   4   1   2   10.66    0.29
   4   1   2   10.68    0.28
  -5  -1  -2    1.34    0.11
  -5  -1  -2    1.13    0.11
  -5  -1  -2    1.27    0.14
   5   1   2    1.40    0.11
   5   1   2    1.34    0.12
  -6  -1  -2    0.56    0.11
  -6  -1  -2    0.30    0.10
  -6  -1  -2    0.39    0.12
   6   1   2    0.62    0.11
   6   1   2    0.53    0.10
  -7  -1  -2    1.04    0.15
  -7  -1  -2    1.14    0.15
  -7  -1  -2    0.93    0.15
   7   1   2    1.18    0.14
   7   1   2    0.99    0.13
  -8  -1  -2   57.57    1.30
  -8  -1  -2   57.83    1.25
  -8  -1  -2   59.75    1.34
   8   1   2   57.34    1.28
  -9  -1  -2    7.81    0.32
  -9  -1  -2    8.23    0.40
  -9  -1  -2    7.08    0.33
   9   1   2    7.59    0.33
 -10  -1  -2   -0.01    0.17
 -10  -1  -2    0.07    0.16
 -10  -1  -2    0.17    0.19
  10   1   2    0.04    0.17
 -11  -1  -2   14.82    0.53
 -11  -1  -2   13.64    0.50
 -11  -1  -2   13.75    0.57
  11   1   2   14.71    0.50
 -12  -1  -2    8.41    0.41
 -12  -1  -2    8.18    0.50
 -12  -1  -2    9.43    0.47
  12   1   2    9.39    0.44
  12   1   2    8.37    0.49
 -13  -1  -2    3.67    0.33
 -13  -1  -2    4.07    0.37
  13   1   2    3.40    0.35
 -14  -1  -2   -0.23    0.28
 -14  -1  -2    0.12    0.27
  14   1   2    0.22    0.29
 -15  -1  -2    0.07    0.30
  15   1   2    1.01    0.35
 -17   2   2   -0.21    0.31
 -17   2   2   -0.25    0.37
 -16   2   2    0.54    0.28
 -16   2   2    0.29    0.33
 -15   2   2   10.22    0.49
 -15   2   2    9.79    0.55
  14  -2  -2    8.82    0.53
 -14   2   2    8.44    0.44
 -14   2   2    8.61    0.53
  13  -2  -2    3.25    0.33
 -13   2   2    2.83    0.34
 -13   2   2    2.80    0.27
  12  -2  -2    0.44    0.23
 -12   2   2    0.08    0.22
 -12   2   2   -0.03    0.17
  11  -2  -2   13.56    0.49
 -11   2   2   13.95    0.54
 -11   2   2   13.81    0.46
 -11   2   2   13.58    0.45
  10  -2  -2   52.70    1.24
 -10   2   2   52.43    1.26
 -10   2   2   53.71    1.18
 -10   2   2   51.42    1.14
   9  -2  -2    8.30    0.37
  -9   2   2    8.60    0.30
  -9   2   2    8.32    0.39
  -9   2   2    8.03    0.30
   8  -2  -2   16.96    0.51
  -8   2   2   17.43    0.45
  -8   2   2   17.88    0.46
  -8   2   2   17.42    0.52
   7  -2  -2    1.27    0.15
  -7   2   2    1.14    0.12
  -7   2   2    1.13    0.11
  -7   2   2    0.95    0.15
   6  -2  -2  258.23    5.15
  -6   2   2  264.17    4.93
  -6   2   2  257.84    5.13
  -6   2   2  254.56    5.24
  -6   2   2  255.40    4.93
   5  -2  -2   38.82    0.88
  -5   2   2   40.57    0.91
  -5   2   2   40.19    0.83
  -5   2   2   41.20    0.85
  -5   2   2   41.69    0.83
   4  -2  -2   57.58    1.20
  -4   2   2   56.70    1.22
  -4   2   2   58.40    1.16
  -4   2   2   55.78    1.13
  -4   2   2   58.58    1.13
   3  -2  -2   14.31    0.33
  -3   2   2   12.72    0.34
  -3   2   2   13.14    0.28
  -3   2   2   13.21    0.29
   2  -2  -2  244.72    4.83
   2  -2  -2  245.50    4.85
  -2   2   2  245.63    4.91
  -2   2   2  245.78    4.63
  -2   2   2  242.79    4.65
   1  -2  -2    0.11    0.03
  -1   2   2    0.15    0.04
  -1   2   2    0.11    0.04
  -1   2   2    0.15    0.03
   0  -2  -2   71.52    1.45
   0  -2  -2   69.99    1.38
   0   2   2   73.02    1.39
   0   2   2   73.08    1.44
   0   2   2   71.44    1.46
  -1  -2  -2  111.98    2.26
  -1  -2  -2  110.33    2.15
   1   2   2  114.89    2.23
   1   2   2  113.53    2.15
   1   2   2  110.26    2.26
  -2  -2  -2  447.54    8.65
   2   2   2  459.08    9.20
   2   2   2  457.78    8.66
   2   2   2  453.63    8.93
  -3  -2  -2   10.96    0.28
  -3  -2  -2   11.24    0.32
   3   2   2   11.41    0.28
   3   2   2   11.39    0.29
   3   2   2   10.92    0.29
  -4  -2  -2    5.14    0.19
  -4  -2  -2    4.64    0.22
   4   2   2    4.91    0.19
   4   2   2    4.91    0.18
   4   2   2    5.03    0.18
  -5  -2  -2   19.45    0.47
  -5  -2  -2   19.85    0.53
   5   2   2   19.55    0.47
   5   2   2   20.10    0.47
   5   2   2   18.85    0.49
  -6  -2  -2    9.42    0.31
  -6  -2  -2    9.55    0.35
   6   2   2    9.18    0.30
   6   2   2   10.23    0.31
   6   2   2   10.29    0.33
  -7  -2  -2   22.23    0.57
  -7  -2  -2   22.98    0.63
   7   2   2   22.29    0.55
   7   2   2   22.68    0.57
   7   2   2   23.27    0.60
  -8  -2  -2    2.93    0.22
  -8  -2  -2    2.69    0.24
   8   2   2    2.88    0.20
   8   2   2    2.71    0.22
  -9  -2  -2   14.82    0.55
  -9  -2  -2   15.26    0.47
   9   2   2   14.32    0.45
   9   2   2   14.15    0.49
 -10  -2  -2    2.06    0.27
 -10  -2  -2    1.69    0.22
  10   2   2    1.40    0.20
  10   2   2    1.90    0.24
 -11  -2  -2   11.99    0.55
 -11  -2  -2   12.32    0.46
  11   2   2   12.57    0.52
  11   2   2   11.60    0.43
 -12  -2  -2    3.26    0.35
 -12  -2  -2    3.11    0.31
  12   2   2    3.52    0.33
 -13  -2  -2    1.57    0.31
 -13  -2  -2    1.25    0.28
  13   2   2    1.63    0.31
 -14  -2  -2    2.79    0.34
 -14  -2  -2    3.03    0.40
  14   2   2    3.42    0.38
 -15  -2  -2    1.79    0.35
 -15  -2  -2    1.53    0.38
  15   2   2    2.20    0.38
 -17   3   2    1.74    0.36
 -17   3   2    2.34    0.44
 -16   3   2   -0.03    0.35
 -16   3   2    0.27    0.27
  15  -3  -2    5.79    0.47
 -15   3   2    6.12    0.48
 -15   3   2    5.83    0.40
  14  -3  -2    1.42    0.32
 -14   3   2    1.27    0.31
 -14   3   2    1.28    0.27
  13  -3  -2    2.85    0.32
 -13   3   2    2.60    0.27
 -13   3   2    2.91    0.33
  12  -3  -2    6.46    0.39
 -12   3   2    5.87    0.34
 -12   3   2    6.62    0.40
  11  -3  -2    0.24    0.20
 -11   3   2    0.80    0.18
 -11   3   2    0.95    0.23
  10  -3  -2    1.04    0.22
 -10   3   2    1.00    0.14
 -10   3   2    0.82    0.20
 -10   3   2    0.68    0.16
   9  -3  -2    6.61    0.35
  -9   3   2    7.08    0.26
  -9   3   2    5.78    0.27
  -9   3   2    6.73    0.34
   8  -3  -2   41.20    0.95
  -8   3   2   38.50    0.86
  -8   3   2   38.98    0.86
  -8   3   2   39.11    0.95
   7  -3  -2    0.92    0.16
  -7   3   2    0.73    0.11
  -7   3   2    0.82    0.15
  -7   3   2    0.83    0.09
   6  -3  -2    3.33    0.22
  -6   3   2    2.73    0.19
  -6   3   2    3.44    0.17
  -6   3   2    3.18    0.13
   5  -3  -2   25.67    0.62
  -5   3   2   26.16    0.54
  -5   3   2   25.86    0.56
  -5   3   2   25.71    0.63
  -5   3   2   26.81    0.57
   4  -3  -2   34.94    0.76
  -4   3   2   35.20    0.78
  -4   3   2   34.56    0.69
  -4   3   2   33.79    0.71
  -4   3   2   33.57    0.71
   3  -3  -2    0.04    0.06
  -3   3   2    0.01    0.04
  -3   3   2    0.02    0.06
  -3   3   2    0.03    0.04
   2  -3  -2   39.82    0.83
   2  -3  -2   41.51    0.86
  -2   3   2   40.03    0.88
  -2   3   2   41.70    0.82
   1  -3  -2    3.05    0.11
  -1   3   2    3.38    0.13
  -1   3   2    3.33    0.14
  -1   3   2    3.22    0.11
   0  -3  -2   24.49    0.54
   0  -3  -2   23.81    0.51
   0   3   2   24.31    0.51
   0   3   2   24.39    0.55
   0   3   2   25.26    0.53
  -1  -3  -2   45.20    0.96
  -1  -3  -2   43.57    0.90
   1   3   2   44.26    0.95
   1   3   2   45.46    0.90
   1   3   2   45.66    0.92
  -2  -3  -2   -0.04    0.07
  -2  -3  -2    0.06    0.06
   2   3   2    0.21    0.07
   2   3   2    0.08    0.06
   2   3   2    0.17    0.06
  -3  -3  -2    1.36    0.10
  -3  -3  -2    1.56    0.13
   3   3   2    1.48    0.09
   3   3   2    1.31    0.10
   3   3   2    1.59    0.11
  -4  -3  -2   16.22    0.41
  -4  -3  -2   16.77    0.47
   4   3   2   17.08    0.40
   4   3   2   16.94    0.43
   4   3   2   17.04    0.42
  -5  -3  -2   10.32    0.31
  -5  -3  -2   10.75    0.37
   5   3   2   10.70    0.32
   5   3   2   10.71    0.30
   5   3   2   10.55    0.31
  -6  -3  -2   22.11    0.61
  -6  -3  -2   21.32    0.54
   6   3   2   21.27    0.55
   6   3   2   21.23    0.52
   6   3   2   22.03    0.53
  -7  -3  -2    0.03    0.14
  -7  -3  -2   -0.11    0.12
   7   3   2    0.17    0.11
   7   3   2   -0.08    0.12
   7   3   2    0.04    0.11
  -8  -3  -2   19.29    0.62
  -8  -3  -2   19.47    0.54
   8   3   2   21.09    0.58
   8   3   2   19.28    0.52
  -9  -3  -2   13.78    0.55
  -9  -3  -2   13.58    0.45
   9   3   2   13.76    0.43
   9   3   2   13.88    0.50
 -10  -3  -2    7.31    0.35
 -10  -3  -2    6.94    0.42
  10   3   2    6.58    0.37
 -11  -3  -2    4.35    0.32
 -11  -3  -2    4.35    0.37
  11   3   2    5.00    0.35
 -12  -3  -2    1.31    0.27
 -12  -3  -2    1.12    0.30
  12   3   2    1.07    0.27
 -13  -3  -2    0.94    0.27
 -13  -3  -2    0.49    0.31
  13   3   2    1.14    0.30
 -14  -3  -2    1.08    0.36
 -14  -3  -2    1.15    0.31
  14   3   2    0.73    0.33
 -15  -3  -2   -0.04    0.35
  15   3   2    0.86    0.36
 -17   4   2    4.51    0.51
 -17   4   2    4.11    0.42
 -16   4   2    2.80    0.43
 -16   4   2    4.43    0.39
  15  -4  -2    1.23    0.35
 -15   4   2    1.31    0.27
 -15   4   2    1.82    0.37
  14  -4  -2   12.10    0.59
 -14   4   2   12.92    0.61
 -14   4   2   12.69    0.52
  13  -4  -2    6.24    0.43
 -13   4   2    6.28    0.43
 -13   4   2    6.42    0.38
  12  -4  -2    0.95    0.25
 -12   4   2    1.13    0.21
 -12   4   2    0.65    0.26
  11  -4  -2    0.24    0.21
 -11   4   2    0.66    0.17
 -11   4   2    0.50    0.23
  10  -4  -2   47.29    1.16
 -10   4   2   46.68    1.06
 -10   4   2   50.20    1.19
   9  -4  -2    6.81    0.34
  -9   4   2    7.01    0.28
  -9   4   2    7.24    0.25
  -9   4   2    7.02    0.37
   8  -4  -2    0.46    0.16
  -8   4   2    0.51    0.17
  -8   4   2    0.75    0.09
  -8   4   2    0.94    0.14
   7  -4  -2   23.87    0.63
  -7   4   2   23.19    0.63
  -7   4   2   23.46    0.55
  -7   4   2   23.99    0.51
   6  -4  -2    3.44    0.22
  -6   4   2    3.69    0.11
  -6   4   2    3.68    0.25
  -6   4   2    3.57    0.17
   5  -4  -2    0.78    0.12
  -5   4   2    1.11    0.10
  -5   4   2    1.06    0.13
   4  -4  -2   29.78    0.67
  -4   4   2   28.64    0.62
  -4   4   2   28.36    0.68
   3  -4  -2    7.46    0.24
  -3   4   2    7.66    0.21
   2  -4  -2  132.16    2.62
   2  -4  -2  133.72    2.64
  -2   4   2  129.61    2.54
  -2   4   2  131.23    2.70
   1  -4  -2    7.08    0.20
   1  -4  -2    6.51    0.19
  -1   4   2    7.38    0.24
  -1   4   2    6.95    0.20
  -1   4   2    7.14    0.21
   0  -4  -2   35.01    0.77
   0  -4  -2   36.72    0.74
   0   4   2   35.40    0.79
   0   4   2   35.59    0.76
   0   4   2   35.70    0.74
  -1  -4  -2    0.78    0.09
  -1  -4  -2    0.94    0.09
   1   4   2    0.97    0.10
   1   4   2    0.79    0.08
   1   4   2    0.98    0.08
  -2  -4  -2    7.72    0.27
  -2  -4  -2    8.07    0.24
   2   4   2    7.90    0.22
   2   4   2    7.66    0.25
   2   4   2    7.64    0.24
  -3  -4  -2   39.74    0.84
  -3  -4  -2   39.69    0.91
   3   4   2   39.26    0.88
   3   4   2   39.77    0.83
   3   4   2   38.93    0.84
  -4  -4  -2    5.49    0.27
  -4  -4  -2    6.08    0.23
   4   4   2    6.20    0.25
   4   4   2    6.04    0.20
   4   4   2    6.29    0.23
  -5  -4  -2    0.90    0.12
  -5  -4  -2    0.95    0.16
   5   4   2    0.73    0.13
   5   4   2    1.12    0.11
   5   4   2    0.93    0.13
  -6  -4  -2    0.22    0.14
  -6  -4  -2    0.25    0.13
   6   4   2    0.26    0.10
   6   4   2    0.35    0.12
  -7  -4  -2   17.95    0.59
  -7  -4  -2   17.38    0.49
   7   4   2   17.45    0.45
   7   4   2   17.56    0.53
  -8  -4  -2   12.33    0.52
  -8  -4  -2   12.69    0.42
   8   4   2   13.14    0.38
   8   4   2   12.57    0.46
  -9  -4  -2    2.55    0.24
  -9  -4  -2    2.99    0.31
   9   4   2    2.32    0.25
 -10  -4  -2    3.69    0.29
 -10  -4  -2    3.81    0.35
  10   4   2    3.08    0.30
 -11  -4  -2   14.97    0.61
 -11  -4  -2   14.09    0.54
  11   4   2   15.28    0.56
 -12  -4  -2    0.54    0.24
 -12  -4  -2    0.25    0.29
  12   4   2    0.20    0.26
 -13  -4  -2    0.85    0.32
 -13  -4  -2    0.45    0.29
  13   4   2    1.11    0.32
 -14  -4  -2    1.11    0.37
  14   4   2    2.07    0.37
 -15  -4  -2    0.91    0.39
 -17   5   2    0.71    0.40
 -17   5   2    0.24    0.32
  16  -5  -2    7.56    0.54
 -16   5   2    6.89    0.54
 -16   5   2    6.88    0.44
  15  -5  -2    1.81    0.37
 -15   5   2    1.76    0.31
 -15   5   2    1.27    0.34
  14  -5  -2    0.31    0.29
 -14   5   2    0.23    0.30
 -14   5   2   -0.12    0.23
  13  -5  -2    7.66    0.46
 -13   5   2    7.36    0.38
 -13   5   2    7.07    0.45
  12  -5  -2   21.67    0.73
 -12   5   2   21.60    0.61
 -12   5   2   20.47    0.69
  11  -5  -2    0.45    0.24
 -11   5   2    0.32    0.21
 -11   5   2    0.12    0.16
  10  -5  -2    2.55    0.28
 -10   5   2    2.53    0.26
 -10   5   2    2.55    0.22
   9  -5  -2    7.74    0.37
  -9   5   2    6.90    0.38
  -9   5   2    7.07    0.29
   8  -5  -2  157.44    3.25
  -8   5   2  155.39    3.29
  -8   5   2  157.48    3.08
   7  -5  -2   14.93    0.45
  -7   5   2   13.48    0.39
  -7   5   2   13.46    0.46
   6  -5  -2   14.07    0.43
  -6   5   2   13.55    0.42
  -6   5   2   14.14    0.37
   5  -5  -2    2.07    0.17
  -5   5   2    3.00    0.17
  -5   5   2    2.44    0.18
   4  -5  -2  114.62    2.30
  -4   5   2  111.62    2.19
  -4   5   2  110.32    2.34
   3  -5  -2    0.18    0.04
   3  -5  -2    0.09    0.08
  -3   5   2    0.07    0.08
  -3   5   2    0.17    0.07
   2  -5  -2    4.63    0.18
   2  -5  -2    4.71    0.15
   2  -5  -2    4.18    0.16
  -2   5   2    4.33    0.17
  -2   5   2    4.76    0.22
   1  -5  -2    0.35    0.07
   1  -5  -2    0.41    0.07
  -1   5   2    0.24    0.07
  -1   5   2    0.25    0.09
  -1   5   2    0.33    0.08
   0  -5  -2   87.97    1.73
   0  -5  -2   88.89    1.81
   0   5   2   87.63    1.78
   0   5   2   87.95    1.73
   0   5   2   86.18    1.84
  -1  -5  -2    7.82    0.24
  -1  -5  -2    7.58    0.27
   1   5   2    7.30    0.28
   1   5   2    7.89    0.23
   1   5   2    7.86    0.24
  -2  -5  -2    5.37    0.21
  -2  -5  -2    5.58    0.26
   2   5   2    5.41    0.21
   2   5   2    5.21    0.23
   2   5   2    5.21    0.18
  -3  -5  -2   27.09    0.70
  -3  -5  -2   28.22    0.64
   3   5   2   28.62    0.62
   3   5   2   27.90    0.64
   3   5   2   28.12    0.68
  -4  -5  -2    2.26    0.19
  -4  -5  -2    2.01    0.16
   4   5   2    2.06    0.12
   4   5   2    2.11    0.17
   4   5   2    1.81    0.15
  -5  -5  -2   45.11    0.99
  -5  -5  -2   44.88    1.09
   5   5   2   44.94    0.99
   5   5   2   46.14    0.97
   5   5   2   46.03    1.05
  -6  -5  -2    1.43    0.20
  -6  -5  -2    1.62    0.18
   6   5   2    1.34    0.17
   6   5   2    1.70    0.19
   6   5   2    1.59    0.13
  -7  -5  -2    1.55    0.24
  -7  -5  -2    1.23    0.19
   7   5   2    1.46    0.15
   7   5   2    1.52    0.20
  -8  -5  -2   21.63    0.60
  -8  -5  -2   22.01    0.69
   8   5   2   21.41    0.65
  -9  -5  -2   48.91    1.15
  -9  -5  -2   49.31    1.27
   9   5   2   49.50    1.20
 -10  -5  -2    3.16    0.29
 -10  -5  -2    3.82    0.37
  10   5   2    3.43    0.32
 -11  -5  -2   -0.27    0.27
 -11  -5  -2    0.14    0.22
  11   5   2   -0.20    0.24
 -12  -5  -2    2.06    0.37
 -12  -5  -2    1.76    0.31
  12   5   2    2.03    0.30
 -13  -5  -2    5.15    0.47
  13   5   2    5.37    0.44
 -14  -5  -2   -0.57    0.34
  14   5   2    0.07    0.32
 -15  -5  -2    0.93    0.39
  17  -6  -2    0.89    0.38
 -17   6   2    0.54    0.37
 -17   6   2    1.03    0.32
  16  -6  -2    0.40    0.37
 -16   6   2    0.15    0.29
 -16   6   2    0.28    0.37
  15  -6  -2    0.61    0.35
 -15   6   2    1.04    0.33
 -15   6   2    0.72    0.28
  14  -6  -2    3.57    0.41
 -14   6   2    3.51    0.38
 -14   6   2    4.12    0.33
  13  -6  -2    4.45    0.40
 -13   6   2    4.81    0.39
 -13   6   2    4.74    0.33
  12  -6  -2    7.57    0.48
 -12   6   2    6.54    0.45
 -12   6   2    6.53    0.37
  11  -6  -2    0.39    0.23
 -11   6   2    0.14    0.23
 -11   6   2    0.40    0.19
  10  -6  -2   20.25    0.64
 -10   6   2   19.18    0.63
 -10   6   2   19.65    0.56
   9  -6  -2    9.88    0.43
  -9   6   2   10.29    0.42
  -9   6   2    9.19    0.34
   8  -6  -2   15.89    0.52
  -8   6   2   16.28    0.45
  -8   6   2   15.71    0.52
   7  -6  -2   -0.28    0.13
  -7   6   2    0.13    0.11
  -7   6   2    0.10    0.14
   6  -6  -2    5.65    0.27
  -6   6   2    4.77    0.22
  -6   6   2    5.71    0.29
   5  -6  -2   21.52    0.56
  -5   6   2   21.15    0.57
  -5   6   2   21.12    0.51
   4  -6  -2   27.18    0.56
  -4   6   2   28.02    0.69
  -4   6   2   27.15    0.62
   3  -6  -2    0.80    0.07
   3  -6  -2    0.74    0.09
   3  -6  -2    0.55    0.11
  -3   6   2    0.60    0.10
  -3   6   2    0.63    0.13
   2  -6  -2   19.07    0.48
   2  -6  -2   18.96    0.45
   2  -6  -2   19.03    0.45
  -2   6   2   19.57    0.46
  -2   6   2   19.71    0.52
   1  -6  -2    4.35    0.18
   1  -6  -2    4.07    0.18
   1  -6  -2    4.30    0.19
  -1   6   2    4.64    0.25
  -1   6   2    3.75    0.18
   0  -6  -2   58.58    1.21
   0  -6  -2   58.55    1.26
   0   6   2   59.04    1.30
   0   6   2   59.79    1.24
   0   6   2   59.56    1.22
  -1  -6  -2   60.77    1.26
  -1  -6  -2   62.51    1.33
   1   6   2   60.55    1.27
   1   6   2   62.98    1.28
   1   6   2   60.88    1.35
  -2  -6  -2    6.36    0.28
  -2  -6  -2    5.85    0.23
   2   6   2    5.76    0.24
   2   6   2    6.09    0.21
   2   6   2    6.05    0.28
  -3  -6  -2   10.35    0.38
  -3  -6  -2   10.79    0.33
   3   6   2   10.85    0.30
   3   6   2   10.60    0.33
   3   6   2   10.57    0.36
  -4  -6  -2    1.78    0.19
  -4  -6  -2    1.30    0.16
   4   6   2    1.83    0.17
   4   6   2    1.77    0.13
   4   6   2    1.51    0.17
  -5  -6  -2   13.90    0.51
  -5  -6  -2   14.78    0.43
   5   6   2   13.64    0.37
   5   6   2   14.76    0.44
   5   6   2   14.23    0.47
  -6  -6  -2   11.23    0.40
  -6  -6  -2   11.60    0.47
   6   6   2   12.52    0.45
   6   6   2   12.01    0.34
  -7  -6  -2    5.35    0.36
  -7  -6  -2    5.40    0.30
   7   6   2    5.48    0.33
  -8  -6  -2    1.65    0.28
  -8  -6  -2    1.34    0.22
   8   6   2    1.41    0.24
  -9  -6  -2    7.14    0.44
  -9  -6  -2    6.74    0.36
   9   6   2    6.61    0.43
 -10  -6  -2   -0.05    0.22
 -10  -6  -2    0.35    0.26
  10   6   2    0.27    0.24
 -11  -6  -2    0.20    0.29
 -11  -6  -2   -0.11    0.25
  11   6   2    0.55    0.27
 -12  -6  -2    2.10    0.38
  12   6   2    2.49    0.36
 -13  -6  -2   -0.19    0.32
  13   6   2   -0.01    0.31
 -14  -6  -2    0.16    0.35
  17  -7  -2    5.49    0.55
 -17   7   2    4.53    0.50
 -17   7   2    4.20    0.42
  16  -7  -2    7.97    0.57
 -16   7   2    7.92    0.55
 -16   7   2    7.69    0.47
  15  -7  -2    1.33    0.37
 -15   7   2    1.11    0.30
 -15   7   2    1.00    0.33
  14  -7  -2    1.15    0.36
 -14   7   2    0.60    0.31
 -14   7   2    0.65    0.25
  13  -7  -2    0.11    0.27
 -13   7   2    0.38    0.22
 -13   7   2    0.53    0.29
  12  -7  -2    1.62    0.30
 -12   7   2    2.38    0.27
 -12   7   2    1.53    0.29
  11  -7  -2    4.24    0.37
 -11   7   2    3.73    0.28
 -11   7   2    4.13    0.35
  10  -7  -2   20.19    0.67
 -10   7   2   20.25    0.58
 -10   7   2   21.73    0.67
   9  -7  -2    5.58    0.36
  -9   7   2    5.99    0.31
  -9   7   2    6.94    0.40
   8  -7  -2    8.17    0.39
  -8   7   2    8.37    0.33
  -8   7   2    9.33    0.42
   7  -7  -2    0.24    0.16
  -7   7   2    0.37    0.17
  -7   7   2    0.35    0.13
   6  -7  -2   19.37    0.56
  -6   7   2   18.57    0.56
  -6   7   2   19.88    0.50
   5  -7  -2    2.75    0.20
  -5   7   2    3.03    0.22
  -5   7   2    3.07    0.19
   4  -7  -2   20.45    0.50
   4  -7  -2   20.85    0.45
   4  -7  -2   21.07    0.56
  -4   7   2   21.21    0.52
  -4   7   2   20.65    0.58
   3  -7  -2   20.19    0.47
   3  -7  -2   19.14    0.44
   3  -7  -2   19.89    0.51
  -3   7   2   18.01    0.54
  -3   7   2   19.21    0.49
   2  -7  -2   47.22    0.98
   2  -7  -2   46.84    1.02
   2  -7  -2   44.86    0.99
  -2   7   2   47.37    0.99
  -2   7   2   45.18    1.08
   1  -7  -2    3.93    0.19
   1  -7  -2    4.08    0.21
   1  -7  -2    4.05    0.20
  -1   7   2    3.89    0.24
  -1   7   2    3.85    0.20
   0  -7  -2    4.29    0.21
   0  -7  -2    4.18    0.20
   0  -7  -2    4.05    0.21
   0   7   2    4.36    0.21
   0   7   2    4.17    0.20
   0   7   2    4.06    0.27
  -1  -7  -2   35.56    0.79
  -1  -7  -2   36.09    0.84
   1   7   2   36.21    0.80
   1   7   2   35.74    0.79
   1   7   2   34.60    0.87
  -2  -7  -2   20.96    0.53
  -2  -7  -2   21.86    0.59
   2   7   2   20.75    0.60
   2   7   2   20.77    0.51
   2   7   2   21.36    0.54
  -3  -7  -2    0.00    0.13
  -3  -7  -2    0.02    0.12
   3   7   2   -0.02    0.11
   3   7   2   -0.10    0.09
   3   7   2    0.00    0.14
  -4  -7  -2    6.22    0.34
  -4  -7  -2    6.53    0.28
   4   7   2    6.25    0.28
   4   7   2    6.24    0.23
   4   7   2    5.67    0.34
  -5  -7  -2    8.74    0.35
  -5  -7  -2    8.95    0.41
   5   7   2    9.46    0.29
   5   7   2    8.97    0.41
  -6  -7  -2    0.09    0.19
  -6  -7  -2   -0.02    0.16
   6   7   2    0.09    0.18
  -7  -7  -2   15.88    0.50
  -7  -7  -2   14.74    0.60
   7   7   2   16.14    0.57
  -8  -7  -2    0.75    0.25
  -8  -7  -2    0.64    0.22
   8   7   2    0.52    0.23
  -9  -7  -2    5.90    0.42
  -9  -7  -2    5.55    0.36
   9   7   2    5.48    0.39
 -10  -7  -2    0.22    0.27
 -10  -7  -2   -0.35    0.23
  10   7   2    0.09    0.24
 -11  -7  -2    2.32    0.37
  11   7   2    2.23    0.35
 -12  -7  -2    0.04    0.34
  12   7   2   -0.07    0.31
 -13  -7  -2    0.76    0.37
  13   7   2    1.60    0.39
 -14  -7  -2    0.38    0.37
  17  -8  -2    0.07    0.40
 -17   8   2   -0.32    0.35
 -17   8   2    0.05    0.32
  16  -8  -2    3.05    0.45
 -16   8   2    3.45    0.39
 -16   8   2    2.54    0.41
  15  -8  -2    0.29    0.34
 -15   8   2    0.59    0.28
 -15   8   2    0.30    0.32
  14  -8  -2    9.14    0.56
 -14   8   2    9.10    0.48
 -14   8   2    7.82    0.55
  13  -8  -2    0.49    0.30
 -13   8   2    0.59    0.28
 -13   8   2    0.51    0.23
  12  -8  -2    5.32    0.42
 -12   8   2    5.27    0.34
 -12   8   2    4.21    0.38
  11  -8  -2    3.67    0.36
 -11   8   2    3.05    0.26
 -11   8   2    3.84    0.35
  10  -8  -2   16.86    0.62
 -10   8   2   18.00    0.62
 -10   8   2   17.87    0.55
   9  -8  -2    0.70    0.22
  -9   8   2    0.93    0.23
  -9   8   2    0.59    0.17
   8  -8  -2    0.94    0.22
  -8   8   2    0.52    0.19
  -8   8   2    0.99    0.18
   7  -8  -2    9.62    0.41
  -7   8   2    9.69    0.35
  -7   8   2   10.90    0.45
   6  -8  -2   12.58    0.44
  -6   8   2   12.81    0.40
  -6   8   2   12.42    0.46
   5  -8  -2    1.81    0.19
  -5   8   2    1.72    0.17
  -5   8   2    2.10    0.21
   4  -8  -2   46.27    0.97
   4  -8  -2   49.06    1.08
   4  -8  -2   46.33    1.00
  -4   8   2   45.44    1.11
  -4   8   2   47.54    1.02
   3  -8  -2    0.62    0.12
   3  -8  -2    0.46    0.09
   3  -8  -2    0.32    0.12
  -3   8   2    0.27    0.15
  -3   8   2    0.38    0.12
   2  -8  -2    2.00    0.14
   2  -8  -2    1.83    0.15
   2  -8  -2    1.80    0.16
  -2   8   2    2.07    0.16
  -2   8   2    1.76    0.20
   1  -8  -2    0.26    0.11
   1  -8  -2    0.30    0.12
   1  -8  -2    0.26    0.11
  -1   8   2    0.40    0.15
  -1   8   2    0.35    0.11
   0  -8  -2    4.64    0.26
   0  -8  -2    4.60    0.23
   0  -8  -2    4.30    0.24
   0   8   2    4.97    0.24
   0   8   2    5.01    0.29
  -1  -8  -2    0.02    0.12
  -1  -8  -2    0.11    0.12
   1   8   2    0.11    0.12
   1   8   2    0.12    0.16
   1   8   2    0.08    0.11
  -2  -8  -2    6.16    0.28
  -2  -8  -2    6.14    0.33
   2   8   2    5.90    0.28
   2   8   2    5.35    0.24
   2   8   2    6.09    0.35
  -3  -8  -2    0.78    0.15
  -3  -8  -2    0.90    0.18
   3   8   2    0.99    0.17
   3   8   2    0.82    0.13
   3   8   2    1.26    0.20
  -4  -8  -2   19.02    0.61
  -4  -8  -2   19.58    0.54
   4   8   2   19.52    0.49
   4   8   2   19.55    0.54
   4   8   2   19.30    0.62
  -5  -8  -2    0.18    0.20
  -5  -8  -2    0.06    0.16
   5   8   2    0.03    0.19
  -6  -8  -2    0.59    0.24
  -6  -8  -2    1.09    0.20
   6   8   2    0.49    0.22
  -7  -8  -2    0.09    0.20
  -7  -8  -2   -0.07    0.23
   7   8   2   -0.14    0.22
  -8  -8  -2    0.91    0.28
  -8  -8  -2    0.72    0.23
   8   8   2    1.27    0.26
  -9  -8  -2   -0.05    0.24
  -9  -8  -2    0.10    0.29
   9   8   2    0.06    0.26
 -10  -8  -2    7.69    0.52
  10   8   2    7.85    0.49
 -11  -8  -2    3.76    0.45
  11   8   2    2.80    0.38
 -12  -8  -2    0.62    0.36
  12   8   2    0.98    0.34
 -13  -8  -2    0.04    0.38
  16  -9  -2    1.81    0.42
 -16   9   2    1.34    0.41
 -16   9   2    2.85    0.38
  15  -9  -2    3.13    0.44
 -15   9   2    3.32    0.43
 -15   9   2    3.74    0.37
  14  -9  -2    0.10    0.33
 -14   9   2    0.54    0.32
 -14   9   2   -0.24    0.24
  13  -9  -2    0.90    0.33
 -13   9   2    1.09    0.31
 -13   9   2    0.93    0.25
  12  -9  -2    4.38    0.40
 -12   9   2    4.08    0.38
 -12   9   2    4.24    0.33
  11  -9  -2   -0.02    0.26
 -11   9   2    0.30    0.21
 -11   9   2    0.69    0.27
  10  -9  -2    3.76    0.36
 -10   9   2    3.30    0.33
 -10   9   2    2.97    0.26
   9  -9  -2    5.56    0.38
  -9   9   2    4.75    0.34
  -9   9   2    5.31    0.30
   8  -9  -2   15.10    0.57
  -8   9   2   15.61    0.58
  -8   9   2   15.36    0.48
   7  -9  -2    6.53    0.36
  -7   9   2    6.76    0.32
  -7   9   2    6.22    0.37
   6  -9  -2    2.82    0.24
  -6   9   2    2.83    0.25
  -6   9   2    2.44    0.21
   5  -9  -2    2.50    0.23
  -5   9   2    2.98    0.27
   4  -9  -2   10.59    0.30
   4  -9  -2   11.22    0.39
  -4   9   2   11.30    0.46
  -4   9   2   10.65    0.38
   3  -9  -2   32.36    0.79
   3  -9  -2   33.34    0.73
  -3   9   2   30.43    0.76
  -3   9   2   32.86    0.86
   2  -9  -2    1.07    0.16
   2  -9  -2    0.71    0.14
   2  -9  -2    0.89    0.14
  -2   9   2    0.70    0.14
  -2   9   2    0.86    0.19
   1  -9  -2    5.55    0.27
   1  -9  -2    5.29    0.25
   1  -9  -2    5.63    0.26
  -1   9   2    5.14    0.26
  -1   9   2    4.61    0.32
   0  -9  -2    3.13    0.21
   0  -9  -2    2.90    0.22
   0  -9  -2    2.61    0.19
   0   9   2    2.11    0.24
   0   9   2    2.31    0.20
  -1  -9  -2   24.20    0.65
  -1  -9  -2   25.42    0.60
  -1  -9  -2   23.79    0.62
   1   9   2   23.61    0.69
   1   9   2   24.39    0.63
  -2  -9  -2    3.06    0.25
  -2  -9  -2    3.37    0.21
  -2  -9  -2    3.33    0.23
   2   9   2    2.57    0.25
   2   9   2    3.67    0.24
  -3  -9  -2    8.97    0.36
  -3  -9  -2   10.80    0.43
   3   9   2   10.43    0.46
   3   9   2    9.32    0.37
   3   9   2    9.40    0.32
  -4  -9  -2    0.93    0.22
  -4  -9  -2    0.78    0.18
   4   9   2    0.82    0.22
  -5  -9  -2    6.66    0.44
  -5  -9  -2    5.95    0.35
   5   9   2    6.96    0.44
  -6  -9  -2   -0.04    0.22
  -6  -9  -2    0.32    0.20
   6   9   2    0.15    0.22
  -7  -9  -2    0.02    0.22
  -7  -9  -2    0.17    0.24
   7   9   2    0.26    0.25
  -8  -9  -2    0.82    0.31
   8   9   2    0.67    0.29
  -9  -9  -2    0.95    0.32
   9   9   2    0.85    0.29
 -10  -9  -2    1.91    0.39
  10   9   2    2.02    0.36
 -11  -9  -2    2.92    0.44
  11   9   2    2.96    0.42
 -12  -9  -2    0.32    0.39
  12   9   2   -0.04    0.34
  16 -10  -2    0.74    0.39
 -16  10   2    0.95    0.40
 -16  10   2    1.16    0.34
  15 -10  -2    0.41    0.39
 -15  10   2   -0.06    0.32
 -15  10   2    0.02    0.29
  14 -10  -2   10.92    0.66
 -14  10   2    9.81    0.61
 -14  10   2   10.80    0.51
  13 -10  -2    1.43    0.36
 -13  10   2    1.61    0.35
 -13  10   2    2.19    0.29
  12 -10  -2   10.16    0.58
 -12  10   2   11.02    0.48
 -12  10   2    9.95    0.56
  11 -10  -2    0.62    0.28
 -11  10   2    0.63    0.22
 -11  10   2    0.36    0.26
  10 -10  -2    4.32    0.37
 -10  10   2    4.49    0.38
 -10  10   2    3.89    0.31
   9 -10  -2    1.29    0.27
  -9  10   2    1.05    0.25
  -9  10   2    1.60    0.23
   8 -10  -2   20.24    0.67
  -8  10   2   22.00    0.71
  -8  10   2   21.15    0.60
   7 -10  -2    1.60    0.24
  -7  10   2    1.48    0.26
  -7  10   2    1.63    0.21
   6 -10  -2    4.68    0.32
  -6  10   2    4.05    0.31
  -6  10   2    4.20    0.27
   5 -10  -2    1.95    0.22
  -5  10   2    2.45    0.27
   4 -10  -2    6.61    0.32
  -4  10   2    5.98    0.30
  -4  10   2    6.00    0.41
   3 -10  -2    1.68    0.16
   3 -10  -2    1.77    0.20
  -3  10   2    2.07    0.26
  -3  10   2    2.14    0.21
   2 -10  -2    0.90    0.17
   2 -10  -2    0.91    0.16
  -2  10   2    1.04    0.23
  -2  10   2    0.71    0.16
   1 -10  -2    4.10    0.26
   1 -10  -2    4.09    0.26
  -1  10   2    4.53    0.27
  -1  10   2    4.59    0.33
   0 -10  -2   18.99    0.55
   0 -10  -2   19.59    0.53
   0  10   2   19.47    0.55
   0  10   2   20.63    0.66
  -1 -10  -2    6.24    0.36
  -1 -10  -2    7.29    0.30
   1  10   2    6.00    0.38
   1  10   2    6.83    0.33
  -2 -10  -2    0.51    0.19
  -2 -10  -2    0.71    0.15
   2  10   2    1.00    0.19
   2  10   2    0.83    0.22
  -3 -10  -2    0.24    0.20
   3  10   2    0.20    0.22
  -4 -10  -2    2.00    0.29
   4  10   2    2.22    0.29
  -5 -10  -2    0.09    0.23
   5  10   2    0.72    0.26
  -6 -10  -2    0.32    0.25
   6  10   2   -0.37    0.24
  -7 -10  -2   10.17    0.53
   7  10   2    9.38    0.56
  -8 -10  -2   -0.08    0.29
   8  10   2    0.68    0.31
  -9 -10  -2    0.30    0.31
   9  10   2    0.25    0.29
 -10 -10  -2   -0.07    0.34
  10  10   2   -0.20    0.33
 -11 -10  -2    1.42    0.42
  11  10   2    1.41    0.40
 -12 -10  -2    1.38    0.44
  16 -11  -2   15.34    0.79
 -16  11   2   16.58    0.70
 -16  11   2   16.36    0.75
  15 -11  -2    0.02    0.39
 -15  11   2   -0.27    0.29
 -15  11   2    0.67    0.38
  14 -11  -2    4.90    0.50
 -14  11   2    5.64    0.48
 -14  11   2    4.90    0.42
  13 -11  -2    0.08    0.34
 -13  11   2    0.06    0.26
 -13  11   2   -0.01    0.29
  12 -11  -2    1.05    0.33
 -12  11   2    1.33    0.32
 -12  11   2    1.45    0.29
  11 -11  -2    5.61    0.44
 -11  11   2    5.62    0.44
 -11  11   2    5.66    0.37
  10 -11  -2    4.62    0.41
 -10  11   2    4.59    0.34
 -10  11   2    4.12    0.37
   9 -11  -2    1.18    0.27
  -9  11   2    1.04    0.26
  -9  11   2    0.79    0.22
   8 -11  -2    8.34    0.45
  -8  11   2    8.08    0.45
  -8  11   2    8.71    0.39
   7 -11  -2    2.90    0.29
  -7  11   2    2.73    0.30
  -7  11   2    3.44    0.28
   6 -11  -2    0.00    0.20
  -6  11   2    0.07    0.23
  -6  11   2    0.51    0.18
   5 -11  -2   27.66    0.76
  -5  11   2   26.84    0.72
  -5  11   2   28.02    0.84
   4 -11  -2   -0.11    0.18
  -4  11   2   -0.20    0.17
  -4  11   2    0.11    0.20
   3 -11  -2    3.18    0.21
   3 -11  -2    3.39    0.26
  -3  11   2    2.68    0.29
  -3  11   2    2.99    0.24
   2 -11  -2    0.31    0.16
   2 -11  -2    0.29    0.17
  -2  11   2    0.06    0.17
  -2  11   2    0.39    0.21
   1 -11  -2   14.90    0.49
   1 -11  -2   15.52    0.49
  -1  11   2   15.68    0.61
  -1  11   2   15.11    0.49
   0 -11  -2    0.91    0.17
   0 -11  -2    0.86    0.20
   0  11   2    0.65    0.20
   0  11   2    0.71    0.25
  -1 -11  -2   11.23    0.38
  -1 -11  -2   11.47    0.47
   1  11   2   11.78    0.52
  -2 -11  -2    1.52    0.24
   2  11   2    1.39    0.26
  -3 -11  -2    3.87    0.33
   3  11   2    3.73    0.34
  -4 -11  -2    2.36    0.31
   4  11   2    2.47    0.33
  -5 -11  -2    0.10    0.25
   5  11   2    0.11    0.27
  -6 -11  -2   -0.06    0.27
   6  11   2   -0.16    0.28
  -7 -11  -2    0.98    0.32
   7  11   2    0.87    0.32
  -8 -11  -2    0.64    0.34
   8  11   2    0.62    0.33
  -9 -11  -2    0.18    0.35
   9  11   2    0.76    0.36
 -10 -11  -2    0.22    0.35
  10  11   2    0.21    0.35
 -11 -11  -2    0.26    0.40
  11  11   2   -0.13    0.39
  15 -12  -2    0.53    0.39
 -15  12   2    0.33    0.32
 -15  12   2    0.15    0.37
  14 -12  -2    2.84    0.47
 -14  12   2    2.48    0.40
 -14  12   2    1.85    0.34
  13 -12  -2   -0.08    0.35
 -13  12   2    0.20    0.31
 -13  12   2    0.45    0.27
  12 -12  -2    3.02    0.40
 -12  12   2    3.37    0.40
 -12  12   2    3.26    0.34
  11 -12  -2    0.27    0.29
 -11  12   2    0.16    0.25
 -11  12   2   -0.14    0.27
  10 -12  -2    2.89    0.37
 -10  12   2    3.89    0.39
 -10  12   2    3.79    0.32
   9 -12  -2    2.11    0.34
  -9  12   2    2.62    0.34
  -9  12   2    2.95    0.29
   8 -12  -2    6.62    0.45
  -8  12   2    6.69    0.37
  -8  12   2    5.80    0.42
   7 -12  -2    1.08    0.26
  -7  12   2    0.67    0.22
  -7  12   2    1.20    0.27
   6 -12  -2    3.39    0.30
  -6  12   2    2.55    0.27
  -6  12   2    3.38    0.35
   5 -12  -2    5.99    0.38
  -5  12   2    5.47    0.34
  -5  12   2    4.80    0.38
   4 -12  -2    5.67    0.36
  -4  12   2    5.34    0.34
  -4  12   2    5.37    0.39
   3 -12  -2    0.06    0.18
  -3  12   2    0.41    0.26
  -3  12   2    0.21    0.18
   2 -12  -2    0.54    0.18
   2 -12  -2    0.71    0.20
  -2  12   2    0.67    0.21
  -2  12   2    0.78    0.27
   1 -12  -2   10.40    0.40
   1 -12  -2   10.56    0.42
  -1  12   2   10.09    0.51
  -1  12   2   10.37    0.45
   0 -12  -2    0.28    0.20
   0 -12  -2    0.36    0.18
   0  12   2    0.74    0.27
  -1 -12  -2    5.23    0.35
   1  12   2    5.33    0.41
  -2 -12  -2    0.03    0.20
   2  12   2   -0.04    0.26
  -3 -12  -2    7.03    0.46
   3  12   2    6.62    0.45
  -4 -12  -2   -0.26    0.26
   4  12   2    0.46    0.30
  -5 -12  -2   10.27    0.57
   5  12   2   11.27    0.62
  -6 -12  -2   -0.07    0.28
   6  12   2    0.32    0.32
  -7 -12  -2    0.32    0.32
   7  12   2    0.35    0.34
  -8 -12  -2    0.20    0.35
   8  12   2   -0.17    0.31
  -9 -12  -2    5.13    0.50
   9  12   2    4.93    0.51
 -10 -12  -2    0.72    0.41
  10  12   2    1.30    0.42
  14 -13  -2    6.17    0.56
 -14  13   2    4.85    0.51
 -14  13   2    4.51    0.43
  13 -13  -2    0.82    0.38
 -13  13   2    0.79    0.36
 -13  13   2    1.29    0.32
  12 -13  -2   -0.52    0.31
 -12  13   2   -0.24    0.26
 -12  13   2   -0.03    0.30
  11 -13  -2    0.10    0.30
 -11  13   2    0.16    0.25
 -11  13   2    0.54    0.30
  10 -13  -2   26.42    0.89
 -10  13   2   24.44    0.87
 -10  13   2   26.34    0.79
   9 -13  -2    1.29    0.32
  -9  13   2    1.49    0.32
  -9  13   2    1.51    0.27
   8 -13  -2    0.10    0.27
  -8  13   2   -0.14    0.25
  -8  13   2   -0.15    0.23
   7 -13  -2    0.01    0.26
  -7  13   2    0.29    0.22
  -7  13   2   -0.02    0.26
   6 -13  -2    1.38    0.26
  -6  13   2    1.44    0.26
  -6  13   2    1.67    0.32
   5 -13  -2    6.16    0.38
  -5  13   2    6.36    0.38
  -5  13   2    6.49    0.46
   4 -13  -2    0.75    0.24
  -4  13   2    0.21    0.26
  -4  13   2    0.41    0.21
   3 -13  -2    0.62    0.22
  -3  13   2    0.61    0.23
  -3  13   2    0.73    0.30
   2 -13  -2    1.25    0.23
  -2  13   2    1.11    0.28
   1 -13  -2    6.17    0.37
   1 -13  -2    6.68    0.36
  -1  13   2    6.97    0.47
   0 -13  -2    1.54    0.25
   0  13   2    1.29    0.32
  -1 -13  -2    0.98    0.26
   1  13   2    0.26    0.29
  -2 -13  -2   -0.07    0.25
   2  13   2    0.15    0.27
  -3 -13  -2    0.39    0.26
   3  13   2    0.13    0.30
  -4 -13  -2    0.29    0.28
   4  13   2    0.65    0.30
  -5 -13  -2    0.26    0.32
   5  13   2    0.23    0.34
  -6 -13  -2   -0.41    0.30
   6  13   2   -0.33    0.33
  -7 -13  -2    0.89    0.35
   7  13   2    1.07    0.39
  -8 -13  -2    0.74    0.36
   8  13   2    0.26    0.38
  -9 -13  -2    0.24    0.38
   9  13   2    0.45    0.41
  14 -14  -2    0.63    0.40
 -14  14   2   -0.06    0.38
 -14  14   2    0.22    0.33
  13 -14  -2   -0.49    0.38
 -13  14   2    0.03    0.34
 -13  14   2   -0.01    0.31
  12 -14  -2    4.92    0.50
 -12  14   2    5.47    0.48
 -12  14   2    5.27    0.42
  11 -14  -2    0.80    0.37
 -11  14   2    0.16    0.34
 -11  14   2    0.64    0.28
  10 -14  -2    0.30    0.31
 -10  14   2    0.57    0.27
 -10  14   2    0.19    0.33
   9 -14  -2    3.74    0.41
  -9  14   2    4.06    0.37
  -9  14   2    4.54    0.45
   8 -14  -2    9.53    0.52
  -8  14   2   10.08    0.48
  -8  14   2    9.16    0.58
   7 -14  -2    1.71    0.31
  -7  14   2    2.02    0.35
   6 -14  -2    0.90    0.29
  -6  14   2    0.84    0.26
  -6  14   2    0.81    0.30
   5 -14  -2    3.44    0.33
  -5  14   2    3.81    0.33
  -5  14   2    2.93    0.37
   4 -14  -2    4.29    0.35
  -4  14   2    4.02    0.42
   3 -14  -2    5.64    0.37
  -3  14   2    4.79    0.43
  -2  14   2    3.07    0.37
  -1  14   2    0.29    0.29
   0 -14  -2    1.13    0.26
   0  14   2    1.10    0.33
  -1 -14  -2    6.66    0.42
   1  14   2    7.54    0.53
  -2 -14  -2    1.05    0.30
   2  14   2    0.30    0.33
  -3 -14  -2    0.47    0.31
   3  14   2    1.25    0.37
  -4 -14  -2    0.60    0.33
   4  14   2   -0.09    0.34
  -5 -14  -2    1.24    0.35
   5  14   2    1.83    0.41
  -6 -14  -2    0.93    0.35
  -7 -14  -2    2.55    0.42
   7  14   2    3.29    0.49
  13 -15  -2    0.03    0.38
 -13  15   2    0.85    0.40
  12 -15  -2    0.53    0.41
 -12  15   2    1.26    0.38
  11 -15  -2   -0.71    0.35
 -11  15   2   -0.03    0.35
  10 -15  -2    1.46    0.39
 -10  15   2    1.65    0.38
   9 -15  -2    0.42    0.34
  -9  15   2   -0.19    0.30
   8 -15  -2   -0.20    0.30
  -8  15   2    0.44    0.35
   7 -15  -2    0.33    0.30
  -7  15   2    0.60    0.35
   6 -15  -2    0.33    0.27
  -6  15   2   -0.11    0.30
   5 -15  -2    1.55    0.30
  -5  15   2    0.97    0.36
   4 -15  -2    1.06    0.28
  -4  15   2    0.49    0.32
  -3  15   2    1.46    0.37
  -2  15   2    1.17    0.37
  -1  15   2    3.03    0.42
   0  15   2    0.31    0.35
  -1 -15  -2    0.23    0.28
   1  15   2    1.02    0.38
  -2 -15  -2    0.33    0.27
   2  15   2    0.48    0.34
  -3 -15  -2   -0.17    0.29
   3  15   2    0.53    0.38
  -4 -15  -2    1.39    0.35
   4  15   2    1.77    0.43
  -5 -15  -2    0.24    0.36
   5  15   2    0.08    0.37
  -6 -15  -2    1.62    0.43
   6  15   2    2.30    0.48
  11 -16  -2    1.92    0.45
 -11  16   2    1.98    0.41
  10 -16  -2    5.35    0.52
 -10  16   2    5.13    0.50
   9 -16  -2    0.67    0.34
  -9  16   2    0.62    0.38
   8 -16  -2    3.68    0.43
  -8  16   2    3.98    0.46
   7 -16  -2    0.82    0.34
  -7  16   2    1.17    0.39
   6 -16  -2    0.23    0.30
  -6  16   2   -0.03    0.35
   5 -16  -2   -0.13    0.29
  -5  16   2   -0.10    0.35
  -4  16   2   -0.22    0.34
  -3  16   2    3.20    0.45
  -2  16   2    1.02    0.37
  -1  16   2    1.97    0.39
   0  16   2    0.70    0.37
   1  16   2    0.66    0.39
   2  16   2    2.38    0.46
  -3 -16  -2    0.17    0.34
   3  16   2   -0.04    0.37
  -4 -16  -2    1.42    0.40
   4  16   2    1.41    0.42
  10 -17  -2    1.61    0.45
 -10  17   2    1.99    0.45
   9 -17  -2    5.14    0.52
  -9  17   2    4.65    0.51
   8 -17  -2    0.09    0.35
  -8  17   2   -0.55    0.34
   7 -17  -2    1.90    0.40
  -7  17   2    2.61    0.45
  -6  17   2    0.16    0.39
  -5  17   2    0.51    0.39
  -4  17   2    2.52    0.43
  -3  17   2    0.14    0.38
  -2  17   2    0.55    0.40
  -1  17   2   -0.03    0.37
   0  17   2    0.26    0.41
   1  17   2    2.03    0.47
   2  17   2    0.55    0.40
  -7  18   2    0.54    0.39
  -6  18   2   -0.03    0.41
  -5  18   2    0.40    0.41
  -4  18   2    0.28    0.39
  -3  18   2    0.19    0.41
  -2  18   2   -0.49    0.41
  -1  18   2    1.17    0.46
  -1  18  -3    0.46    0.45
  -2  18  -3    0.36    0.41
  -3  18  -3   -0.40    0.37
  -4  18  -3    1.85    0.44
  -5  18  -3    0.40    0.43
  -6  18  -3    1.40    0.42
   3  17  -3    1.52    0.46
   2  17  -3    0.14    0.43
   1  17  -3    0.12    0.39
   0  17  -3    4.41    0.51
  -1  17  -3   -0.27    0.40
  -2  17  -3    0.33    0.40
  -3  17  -3    1.01    0.40
  -4  17  -3    2.08    0.45
  -5  17  -3    0.40    0.40
  -6  17  -3    2.88    0.47
  -7  17  -3    0.06    0.36
  -8  17  -3    0.61    0.41
   8 -17   3    1.12    0.40
  -9  17  -3    1.09    0.40
   9 -17   3    0.79    0.41
   5  16  -3    1.31    0.47
  -5 -16   3    1.56    0.39
   4  16  -3    1.15    0.41
  -4 -16   3    1.03    0.38
   3  16  -3    0.15    0.38
  -3 -16   3    0.74    0.33
   2  16  -3    0.01    0.39
  -2 -16   3   -0.61    0.30
   1  16  -3    0.86    0.42
   0  16  -3    0.54    0.37
  -1  16  -3    0.15    0.35
  -2  16  -3    0.35    0.37
  -3  16  -3    8.19    0.59
  -4  16  -3    0.04    0.36
  -5  16  -3    2.03    0.39
  -6  16  -3    0.16    0.36
  -7  16  -3    1.99    0.39
  -8  16  -3    1.63    0.39
   8 -16   3    1.35    0.39
  -9  16  -3   -0.21    0.34
   9 -16   3   -0.34    0.35
 -10  16  -3    5.09    0.50
  10 -16   3    6.66    0.57
 -11  16  -3    5.59    0.52
  11 -16   3    4.90    0.52
   6  15  -3    4.29    0.54
  -6 -15   3    3.70    0.46
   5  15  -3    0.22    0.41
  -5 -15   3   -0.01    0.33
   4  15  -3    0.24    0.39
  -4 -15   3   -0.19    0.32
   3  15  -3   -0.67    0.35
  -3 -15   3   -0.06    0.29
   2  15  -3    4.04    0.48
  -2 -15   3    3.61    0.39
   1  15  -3    0.23    0.33
  -1 -15   3    0.30    0.29
   0  15  -3    1.36    0.36
   0 -15   3    0.99    0.29
  -1  15  -3    0.94    0.36
  -2  15  -3    4.25    0.47
  -3  15  -3    0.34    0.31
  -4  15  -3    0.39    0.34
  -5  15  -3    0.27    0.33
   5 -15   3    0.16    0.28
  -6  15  -3    4.36    0.46
   6 -15   3    4.89    0.43
  -7  15  -3    2.02    0.37
   7 -15   3    2.37    0.36
  -8  15  -3    1.45    0.36
   8 -15   3    1.18    0.34
  -9  15  -3    9.42    0.62
   9 -15   3    9.18    0.61
 -10  15  -3   -0.40    0.31
  10 -15   3    0.15    0.33
 -11  15  -3    2.35    0.42
  11 -15   3    2.16    0.44
 -12  15  -3    1.11    0.41
  12 -15   3    0.39    0.40
   8  14  -3    2.16    0.45
  -8 -14   3    2.45    0.44
   7  14  -3   -0.44    0.38
  -7 -14   3    0.09    0.36
   6  14  -3    0.03    0.35
  -6 -14   3    0.03    0.32
   5  14  -3    0.98    0.40
  -5 -14   3    0.77    0.32
   4  14  -3    0.06    0.35
  -4 -14   3    0.34    0.31
   3  14  -3    0.41    0.36
  -3 -14   3    0.13    0.28
   2  14  -3    1.64    0.36
  -2 -14   3    2.07    0.33
   1  14  -3    0.52    0.33
  -1 -14   3   -0.04    0.25
   0  14  -3    3.45    0.40
   0 -14   3    3.17    0.32
  -1  14  -3    3.47    0.40
   1 -14   3    3.07    0.32
  -2  14  -3    2.88    0.39
  -3  14  -3    3.32    0.40
  -4  14  -3    3.23    0.38
   4 -14   3    4.83    0.37
  -5  14  -3    0.38    0.31
   5 -14   3    0.37    0.27
  -6  14  -3    0.05    0.28
   6 -14   3    0.07    0.25
  -7  14  -3    2.72    0.37
   7 -14   3    3.11    0.36
  -8  14  -3   11.83    0.59
   8 -14   3   10.80    0.57
  -9  14  -3    7.88    0.53
   9 -14   3    7.88    0.55
 -10  14  -3    0.90    0.36
  10 -14   3    1.08    0.37
 -11  14  -3    3.80    0.43
  11 -14   3    5.47    0.52
 -12  14  -3    0.35    0.36
  12 -14   3    1.41    0.40
 -13  14  -3    6.78    0.54
  13 -14   3    7.28    0.61
   9  13  -3    0.05    0.40
  -9 -13   3    0.61    0.39
   8  13  -3    2.31    0.45
  -8 -13   3    2.14    0.41
   7  13  -3    0.53    0.38
  -7 -13   3    0.76    0.34
   6  13  -3    4.47    0.46
  -6 -13   3    4.07    0.42
   5  13  -3    0.72    0.36
  -5 -13   3    0.19    0.28
   4  13  -3    0.29    0.31
  -4 -13   3    0.22    0.27
   3  13  -3    0.16    0.30
  -3 -13   3    0.26    0.28
   2  13  -3   13.09    0.62
  -2 -13   3   13.15    0.57
   1  13  -3    0.80    0.29
  -1 -13   3    0.45    0.24
   0  13  -3    3.84    0.38
   0 -13   3    3.16    0.30
  -1  13  -3    2.26    0.33
   1 -13   3    2.73    0.28
  -2  13  -3    7.00    0.48
   2 -13   3    7.25    0.39
  -3  13  -3    0.96    0.30
   3 -13   3    0.99    0.24
  -4  13  -3    3.02    0.37
   4 -13   3    2.73    0.30
  -5  13  -3    5.80    0.43
   5 -13   3    6.52    0.43
  -6  13  -3    0.47    0.27
   6 -13   3   -0.04    0.23
  -7  13  -3   11.02    0.58
   7 -13   3   11.07    0.56
  -8  13  -3    0.38    0.28
   8 -13   3    0.01    0.26
  -9  13  -3    3.52    0.39
   9 -13   3    3.00    0.40
 -10  13  -3   -0.27    0.30
  10 -13   3    0.34    0.33
 -11  13  -3    9.57    0.59
  11 -13   3   10.83    0.61
 -12  13  -3    0.42    0.34
  12 -13   3    0.51    0.38
 -13  13  -3   -0.24    0.32
  13 -13   3    0.11    0.37
 -14  13  -3    0.15    0.38
  14 -13   3    0.81    0.41
  10  12  -3    0.29    0.37
 -10 -12   3    0.19    0.36
   9  12  -3   -0.19    0.37
  -9 -12   3    0.13    0.33
   8  12  -3    1.13    0.39
  -8 -12   3    2.12    0.39
   7  12  -3    0.76    0.34
  -7 -12   3    0.79    0.31
   6  12  -3   -0.33    0.28
  -6 -12   3    0.06    0.24
  -6 -12   3   -0.03    0.29
   5  12  -3    0.32    0.29
  -5 -12   3    0.35    0.25
  -5 -12   3    0.42    0.29
   4  12  -3    1.90    0.33
  -4 -12   3    1.97    0.30
  -4 -12   3    2.05    0.28
   3  12  -3    2.94    0.37
  -3 -12   3    3.19    0.29
  -3 -12   3    3.02    0.31
   2  12  -3    0.16    0.28
  -2 -12   3    0.10    0.22
  -2 -12   3    0.11    0.22
   1  12  -3    3.05    0.35
  -1 -12   3    3.16    0.28
  -1 -12   3    2.97    0.28
   0  12  -3    2.32    0.31
   0 -12   3    2.52    0.25
   0 -12   3    1.92    0.24
  -1  12  -3   10.26    0.55
   1 -12   3   11.83    0.45
  -2  12  -3   -0.18    0.24
   2 -12   3    0.27    0.19
   2 -12   3    0.09    0.17
  -3  12  -3   11.76    0.54
   3 -12   3   11.06    0.42
   3 -12   3   10.73    0.46
  -4  12  -3    3.55    0.34
   4 -12   3    3.89    0.30
  -5  12  -3    0.10    0.23
   5 -12   3    0.41    0.23
  -6  12  -3    2.58    0.31
   6 -12   3    2.69    0.31
  -7  12  -3    0.09    0.24
   7 -12   3    0.45    0.24
  -8  12  -3    5.98    0.42
   8 -12   3    5.00    0.41
  -9  12  -3   19.61    0.72
   9 -12   3   19.94    0.73
 -10  12  -3    0.39    0.30
  10 -12   3    0.45    0.30
 -11  12  -3    5.06    0.44
  11 -12   3    5.34    0.47
 -12  12  -3    0.10    0.31
  12 -12   3    0.67    0.37
 -13  12  -3    2.99    0.42
  13 -12   3    3.10    0.44
 -14  12  -3    0.31    0.33
  14 -12   3   -0.22    0.35
 -15  12  -3    2.49    0.44
  15 -12   3    3.56    0.53
  11  11  -3    0.69    0.40
 -11 -11   3    1.33    0.43
  10  11  -3   -0.14    0.36
 -10 -11   3    0.06    0.33
   9  11  -3    0.08    0.32
  -9 -11   3    0.32    0.29
  -9 -11   3    0.69    0.32
   8  11  -3    1.73    0.35
  -8 -11   3    1.94    0.35
  -8 -11   3    1.36    0.31
   7  11  -3    0.18    0.29
  -7 -11   3    0.40    0.28
  -7 -11   3    0.05    0.25
   6  11  -3    0.77    0.32
  -6 -11   3    1.14    0.29
  -6 -11   3    0.85    0.24
   5  11  -3    0.02    0.28
  -5 -11   3   -0.06    0.24
  -5 -11   3    0.46    0.21
   4  11  -3    0.90    0.29
  -4 -11   3    0.26    0.23
  -4 -11   3    0.57    0.21
   3  11  -3    5.13    0.40
  -3 -11   3    5.87    0.40
  -3 -11   3    4.86    0.32
   2  11  -3    6.42    0.43
  -2 -11   3    5.57    0.33
  -2 -11   3    6.58    0.37
   1  11  -3    3.06    0.32
  -1 -11   3    2.65    0.26
  -1 -11   3    3.01    0.26
   0  11  -3    0.36    0.22
   0 -11   3    0.41    0.18
   0 -11   3    0.31    0.19
  -1  11  -3    4.66    0.36
   1 -11   3    4.78    0.31
   1 -11   3    4.58    0.29
   1 -11   3    5.46    0.30
  -2  11  -3   -0.04    0.22
   2 -11   3   -0.05    0.16
   2 -11   3    0.08    0.16
   2 -11   3    0.08    0.16
  -3  11  -3   42.18    1.11
   3 -11   3   41.70    1.02
   3 -11   3   42.68    0.98
  -4  11  -3   -0.31    0.21
  -4  11  -3   -0.01    0.18
   4 -11   3   -0.19    0.18
  -5  11  -3    9.80    0.47
  -5  11  -3    9.54    0.40
   5 -11   3    9.75    0.45
  -6  11  -3    0.31    0.22
  -6  11  -3    0.09    0.18
   6 -11   3    0.09    0.20
  -7  11  -3   21.17    0.69
  -7  11  -3   20.92    0.62
   7 -11   3   20.79    0.71
  -8  11  -3   -0.17    0.24
  -8  11  -3    0.20    0.20
   8 -11   3    0.59    0.27
  -9  11  -3    3.51    0.32
  -9  11  -3    3.45    0.34
   9 -11   3    2.82    0.35
 -10  11  -3    0.74    0.27
 -10  11  -3    1.14    0.25
  10 -11   3    0.66    0.31
 -11  11  -3   19.92    0.66
 -11  11  -3   19.49    0.73
  11 -11   3   19.74    0.76
 -12  11  -3    1.27    0.33
  12 -11   3    1.04    0.35
 -13  11  -3    1.95    0.37
  13 -11   3    1.62    0.39
 -14  11  -3    0.05    0.34
  14 -11   3   -0.11    0.35
 -15  11  -3    9.37    0.63
  15 -11   3   11.40    0.73
  12  10  -3    0.85    0.38
 -12 -10   3    0.85    0.42
  11  10  -3    0.18    0.36
 -11 -10   3    0.20    0.29
 -11 -10   3    0.32    0.37
  10  10  -3   -0.31    0.30
 -10 -10   3    0.28    0.32
 -10 -10   3    0.38    0.30
   9  10  -3    0.32    0.33
  -9 -10   3    0.65    0.33
  -9 -10   3    0.33    0.27
   8  10  -3    0.74    0.31
  -8 -10   3    0.04    0.24
  -8 -10   3   -0.61    0.24
   7  10  -3    0.49    0.30
  -7 -10   3    0.74    0.29
  -7 -10   3    0.94    0.25
   6  10  -3   -0.09    0.25
  -6 -10   3   -0.16    0.23
  -6 -10   3    0.00    0.21
   5  10  -3    3.32    0.35
  -5 -10   3    3.19    0.31
  -5 -10   3    3.38    0.28
   4  10  -3    7.65    0.44
  -4 -10   3    6.79    0.37
  -4 -10   3    7.91    0.44
   3  10  -3    0.12    0.21
  -3 -10   3    0.04    0.20
  -3 -10   3    0.07    0.18
   2  10  -3    6.21    0.40
  -2 -10   3    6.58    0.32
  -2 -10   3    6.53    0.35
   1  10  -3    0.89    0.23
  -1 -10   3    1.08    0.20
  -1 -10   3    1.16    0.19
   0  10  -3   25.49    0.74
   0 -10   3   24.53    0.62
   0 -10   3   24.17    0.67
   0 -10   3   24.25    0.64
  -1  10  -3    4.46    0.33
   1 -10   3    3.74    0.24
   1 -10   3    4.23    0.28
   1 -10   3    3.92    0.25
  -2  10  -3    3.57    0.30
   2 -10   3    3.13    0.22
   2 -10   3    3.03    0.23
   2 -10   3    2.85    0.22
  -3  10  -3    9.81    0.36
  -3  10  -3    9.29    0.44
   3 -10   3    9.62    0.35
   3 -10   3    9.45    0.38
   3 -10   3    9.25    0.38
  -4  10  -3    1.98    0.21
  -4  10  -3    1.94    0.24
   4 -10   3    2.10    0.21
   4 -10   3    1.96    0.17
   4 -10   3    2.27    0.24
  -5  10  -3   30.45    0.84
  -5  10  -3   28.38    0.73
   5 -10   3   27.50    0.77
  -6  10  -3    2.79    0.24
  -6  10  -3    2.49    0.28
   6 -10   3    2.59    0.28
  -7  10  -3    1.36    0.24
  -7  10  -3    1.19    0.20
   7 -10   3    1.17    0.26
  -8  10  -3    0.50    0.20
  -8  10  -3    0.58    0.22
   8 -10   3    0.44    0.24
  -9  10  -3   17.55    0.63
  -9  10  -3   17.29    0.57
   9 -10   3   18.99    0.67
 -10  10  -3    0.11    0.21
 -10  10  -3   -0.18    0.24
  10 -10   3   -0.02    0.26
 -11  10  -3    0.47    0.25
 -11  10  -3    0.11    0.23
  11 -10   3    0.15    0.28
 -12  10  -3    1.86    0.30
 -12  10  -3    2.52    0.35
  12 -10   3    1.87    0.37
 -13  10  -3   35.40    1.06
  13 -10   3   36.65    1.12
 -14  10  -3    1.60    0.37
  14 -10   3    2.55    0.44
 -15  10  -3    0.27    0.35
  15 -10   3    0.31    0.37
 -16  10  -3    0.59    0.36
  16 -10   3    0.75    0.45
  13   9  -3    0.48    0.40
 -13  -9   3    0.61    0.35
 -13  -9   3    0.08    0.37
  12   9  -3    0.68    0.37
 -12  -9   3    0.62    0.37
 -12  -9   3    0.87    0.34
  11   9  -3   -0.05    0.34
 -11  -9   3    0.18    0.29
 -11  -9   3    0.08    0.33
  10   9  -3    1.62    0.36
 -10  -9   3    1.89    0.35
 -10  -9   3    0.90    0.28
   9   9  -3    1.34    0.34
  -9  -9   3    1.97    0.35
  -9  -9   3    1.92    0.28
   8   9  -3    0.12    0.28
  -8  -9   3   -0.07    0.21
  -8  -9   3    0.26    0.25
   7   9  -3    0.15    0.26
  -7  -9   3    0.42    0.21
  -7  -9   3    0.61    0.26
   6   9  -3   11.12    0.51
  -6  -9   3   12.90    0.52
  -6  -9   3   11.25    0.43
   5   9  -3    6.25    0.41
  -5  -9   3    5.63    0.33
  -5  -9   3    6.28    0.38
   4   9  -3    0.32    0.22
  -4  -9   3    0.37    0.20
  -4  -9   3    0.26    0.16
   3   9  -3    2.34    0.27
  -3  -9   3    2.64    0.26
  -3  -9   3    1.94    0.20
   2   9  -3    3.21    0.28
  -2  -9   3    3.08    0.25
  -2  -9   3    3.18    0.23
   1   9  -3   11.87    0.47
  -1  -9   3   12.22    0.44
  -1  -9   3   12.47    0.35
  -1  -9   3   12.06    0.39
   0   9  -3    0.42    0.14
   0   9  -3    0.40    0.18
   0  -9   3    0.37    0.14
   0  -9   3    0.37    0.12
   0  -9   3    0.20    0.14
  -1   9  -3    4.72    0.25
  -1   9  -3    5.17    0.32
   1  -9   3    4.99    0.26
   1  -9   3    4.88    0.24
   1  -9   3    4.86    0.27
  -2   9  -3    9.26    0.34
  -2   9  -3    9.48    0.41
   2  -9   3    9.56    0.35
   2  -9   3    9.20    0.34
   2  -9   3   10.34    0.34
  -3   9  -3   35.97    0.92
  -3   9  -3   36.00    0.83
   3  -9   3   34.29    0.86
   3  -9   3   36.36    0.82
   3  -9   3   35.12    0.83
  -4   9  -3    0.04    0.16
  -4   9  -3    0.27    0.14
   4  -9   3    0.10    0.16
   4  -9   3    0.24    0.11
   4  -9   3    0.20    0.13
  -5   9  -3   10.25    0.37
  -5   9  -3   10.41    0.43
   5  -9   3   10.77    0.32
   5  -9   3   10.91    0.38
   5  -9   3   10.62    0.42
  -6   9  -3    0.48    0.19
  -6   9  -3    0.39    0.16
   6  -9   3    0.57    0.20
  -7   9  -3    7.35    0.38
  -7   9  -3    6.67    0.32
   7  -9   3    6.75    0.39
  -8   9  -3    0.34    0.19
  -8   9  -3   -0.01    0.16
   8  -9   3    0.12    0.21
  -9   9  -3    2.71    0.25
  -9   9  -3    1.69    0.25
   9  -9   3    2.25    0.32
 -10   9  -3   -0.05    0.23
 -10   9  -3    0.18    0.20
  10  -9   3    0.17    0.24
 -11   9  -3   12.86    0.57
 -11   9  -3   13.89    0.51
  11  -9   3   12.44    0.58
 -12   9  -3    0.00    0.27
 -12   9  -3    0.11    0.23
  12  -9   3    0.14    0.31
 -13   9  -3    0.35    0.27
 -13   9  -3    0.44    0.30
  13  -9   3    0.25    0.32
 -14   9  -3    1.01    0.34
  14  -9   3    0.92    0.36
 -15   9  -3    2.39    0.40
  15  -9   3    2.84    0.45
 -16   9  -3    0.12    0.37
  16  -9   3   -0.17    0.40
  13   8  -3    0.18    0.34
 -13  -8   3    0.08    0.29
 -13  -8   3   -0.11    0.36
  12   8  -3    6.20    0.51
 -12  -8   3    4.59    0.46
 -12  -8   3    5.79    0.43
  11   8  -3    3.96    0.43
 -11  -8   3    3.89    0.42
 -11  -8   3    5.23    0.40
  10   8  -3    0.13    0.28
 -10  -8   3    0.26    0.28
 -10  -8   3    0.20    0.25
   9   8  -3    0.30    0.26
  -9  -8   3    0.23    0.21
  -9  -8   3    0.04    0.26
   8   8  -3   -0.18    0.23
  -8  -8   3    0.53    0.25
  -8  -8   3    0.40    0.20
   7   8  -3    0.25    0.23
  -7  -8   3    0.17    0.23
  -7  -8   3   -0.09    0.18
   6   8  -3   15.59    0.56
  -6  -8   3   14.73    0.48
  -6  -8   3   15.10    0.55
   5   8  -3    7.50    0.42
  -5  -8   3    5.47    0.29
  -5  -8   3    6.03    0.36
   4   8  -3   13.07    0.51
  -4  -8   3   11.61    0.45
  -4  -8   3   11.63    0.39
   3   8  -3   43.87    1.06
  -3  -8   3   40.40    0.95
  -3  -8   3   43.39    1.02
   2   8  -3    1.97    0.22
  -2  -8   3    2.40    0.19
  -2  -8   3    2.66    0.23
  -2  -8   3    2.30    0.15
   1   8  -3    6.47    0.34
   1   8  -3    7.05    0.29
  -1  -8   3    6.67    0.29
  -1  -8   3    6.50    0.24
  -1  -8   3    6.45    0.28
   0   8  -3   14.96    0.48
   0   8  -3   14.69    0.41
   0  -8   3   14.05    0.43
   0  -8   3   13.76    0.39
   0  -8   3   13.97    0.41
  -1   8  -3   25.49    0.63
  -1   8  -3   26.96    0.71
   1  -8   3   26.29    0.64
   1  -8   3   26.29    0.65
   1  -8   3   27.23    0.64
  -2   8  -3    0.11    0.11
  -2   8  -3    0.04    0.14
   2  -8   3    0.21    0.12
   2  -8   3    0.02    0.10
   2  -8   3    0.00    0.11
  -3   8  -3    8.19    0.31
  -3   8  -3    8.66    0.36
   3  -8   3    8.11    0.31
   3  -8   3    8.93    0.29
   3  -8   3    8.89    0.34
  -4   8  -3    2.01    0.20
  -4   8  -3    2.35    0.19
   4  -8   3    1.92    0.14
   4  -8   3    1.41    0.18
   4  -8   3    2.04    0.18
  -5   8  -3   79.08    1.64
  -5   8  -3   79.80    1.76
   5  -8   3   77.28    1.73
   5  -8   3   80.13    1.63
   5  -8   3   78.33    1.64
  -6   8  -3    0.16    0.15
  -6   8  -3    0.40    0.09
  -6   8  -3    0.25    0.16
   6  -8   3    0.15    0.16
   6  -8   3    0.38    0.14
  -7   8  -3   19.47    0.61
  -7   8  -3   19.15    0.55
   7  -8   3   20.16    0.62
  -8   8  -3    0.80    0.19
  -8   8  -3    0.71    0.17
   8  -8   3    0.56    0.21
  -9   8  -3   50.88    1.18
  -9   8  -3   52.43    1.25
   9  -8   3   50.90    1.29
 -10   8  -3    3.86    0.32
 -10   8  -3    3.78    0.29
  10  -8   3    3.68    0.35
 -11   8  -3    3.41    0.33
 -11   8  -3    2.92    0.29
  11  -8   3    3.12    0.37
 -12   8  -3    1.46    0.28
 -12   8  -3    1.16    0.27
  12  -8   3    0.85    0.30
 -13   8  -3   20.13    0.72
 -13   8  -3   21.47    0.69
  13  -8   3   22.12    0.81
 -14   8  -3    4.57    0.40
 -14   8  -3    5.55    0.45
  14  -8   3    4.17    0.47
 -15   8  -3    0.73    0.35
  15  -8   3    0.49    0.39
 -16   8  -3   -0.46    0.34
  16  -8   3    0.64    0.39
  14   7  -3    1.71    0.40
 -14  -7   3    1.69    0.44
 -14  -7   3    1.89    0.37
  13   7  -3    0.55    0.35
 -13  -7   3    0.04    0.28
 -13  -7   3   -0.13    0.34
  12   7  -3    3.93    0.41
 -12  -7   3    4.22    0.38
 -12  -7   3    4.37    0.44
  11   7  -3    0.58    0.29
 -11  -7   3    0.69    0.26
 -11  -7   3    0.89    0.32
  10   7  -3    2.06    0.33
 -10  -7   3    2.68    0.28
 -10  -7   3    2.95    0.34
   9   7  -3    2.01    0.31
  -9  -7   3    1.36    0.23
  -9  -7   3    1.72    0.28
   8   7  -3    4.91    0.35
  -8  -7   3    5.26    0.31
  -8  -7   3    5.66    0.38
   7   7  -3    0.29    0.20
  -7  -7   3   -0.05    0.16
  -7  -7   3    0.31    0.21
   6   7  -3    4.28    0.32
  -6  -7   3    5.19    0.34
  -6  -7   3    3.98    0.26
   5   7  -3    4.80    0.31
  -5  -7   3    4.45    0.25
  -5  -7   3    4.60    0.31
   4   7  -3   23.12    0.67
  -4  -7   3   23.75    0.67
  -4  -7   3   23.74    0.59
   3   7  -3   54.78    1.26
   3   7  -3   53.83    1.14
  -3  -7   3   53.88    1.23
  -3  -7   3   53.74    1.15
   2   7  -3   17.43    0.46
   2   7  -3   16.83    0.54
  -2  -7   3   17.39    0.49
  -2  -7   3   16.89    0.40
  -2  -7   3   17.47    0.45
   1   7  -3    3.55    0.21
   1   7  -3    3.69    0.26
  -1  -7   3    3.68    0.22
  -1  -7   3    3.14    0.19
  -1  -7   3    3.73    0.16
   0   7  -3   24.84    0.68
   0   7  -3   26.02    0.60
   0  -7   3   26.29    0.61
   0  -7   3   24.87    0.63
   0  -7   3   25.20    0.59
  -1   7  -3    6.40    0.32
  -1   7  -3    6.40    0.24
   1  -7   3    6.34    0.24
   1  -7   3    6.30    0.24
   1  -7   3    6.58    0.25
  -2   7  -3    4.64    0.29
  -2   7  -3    4.53    0.21
   2  -7   3    4.96    0.24
   2  -7   3    4.57    0.21
   2  -7   3    4.79    0.23
  -3   7  -3   23.03    0.56
  -3   7  -3   22.18    0.61
   3  -7   3   22.27    0.59
   3  -7   3   22.54    0.55
   3  -7   3   23.42    0.54
  -4   7  -3    1.70    0.16
  -4   7  -3    1.61    0.18
   4  -7   3    1.08    0.11
   4  -7   3    1.57    0.15
   4  -7   3    1.26    0.16
  -5   7  -3    3.61    0.22
  -5   7  -3    3.95    0.25
   5  -7   3    3.32    0.24
   5  -7   3    3.35    0.21
  -6   7  -3    0.22    0.09
  -6   7  -3    0.13    0.12
  -6   7  -3    0.27    0.15
   6  -7   3    0.09    0.11
   6  -7   3   -0.13    0.14
  -7   7  -3    9.89    0.40
  -7   7  -3    9.39    0.28
  -7   7  -3    9.58    0.36
   7  -7   3    9.51    0.41
  -8   7  -3    2.55    0.24
  -8   7  -3    2.80    0.23
   8  -7   3    1.91    0.25
  -9   7  -3   20.35    0.62
  -9   7  -3   20.23    0.58
   9  -7   3   20.09    0.67
 -10   7  -3    1.18    0.22
 -10   7  -3    1.06    0.22
  10  -7   3    1.08    0.26
 -11   7  -3   29.81    0.82
 -11   7  -3   31.05    0.86
  11  -7   3   30.92    0.92
 -12   7  -3    2.26    0.32
 -12   7  -3    2.26    0.28
  12  -7   3    2.22    0.36
 -13   7  -3    5.08    0.41
 -13   7  -3    5.43    0.39
  13  -7   3    4.34    0.43
 -14   7  -3    2.85    0.35
 -14   7  -3    3.45    0.40
  14  -7   3    3.96    0.46
 -15   7  -3    5.32    0.46
 -15   7  -3    5.95    0.45
  15  -7   3    5.86    0.53
 -16   7  -3    3.73    0.44
  16  -7   3    3.28    0.48
  14   6  -3   -0.53    0.32
 -14  -6   3    0.24    0.36
 -14  -6   3    0.27    0.30
  13   6  -3    2.86    0.41
 -13  -6   3    1.97    0.39
 -13  -6   3    2.00    0.33
  12   6  -3    0.37    0.32
 -12  -6   3    0.92    0.27
 -12  -6   3    0.94    0.32
  11   6  -3   -0.40    0.25
 -11  -6   3   -0.03    0.22
 -11  -6   3    0.38    0.28
  10   6  -3    1.09    0.27
 -10  -6   3    1.09    0.28
 -10  -6   3    1.06    0.24
   9   6  -3    3.34    0.32
  -9  -6   3    3.46    0.33
  -9  -6   3    3.22    0.26
   8   6  -3    6.71    0.43
  -8  -6   3    6.62    0.33
  -8  -6   3    6.76    0.40
   7   6  -3   12.17    0.48
  -7  -6   3   12.80    0.42
  -7  -6   3   11.90    0.50
   6   6  -3    4.19    0.29
  -6  -6   3    4.64    0.24
  -6  -6   3    3.56    0.27
   5   6  -3   19.13    0.59
  -5  -6   3   20.41    0.58
  -5  -6   3   19.19    0.51
   4   6  -3    0.52    0.15
  -4  -6   3    0.32    0.12
  -4  -6   3    0.45    0.15
   3   6  -3   29.62    0.75
   3   6  -3   30.52    0.66
  -3  -6   3   27.90    0.72
  -3  -6   3   29.06    0.67
   2   6  -3   12.33    0.40
   2   6  -3   12.49    0.34
  -2  -6   3   12.52    0.38
  -2  -6   3   11.82    0.29
  -2  -6   3   12.47    0.34
   1   6  -3   82.89    1.81
   1   6  -3   82.71    1.69
  -1  -6   3   84.29    1.78
  -1  -6   3   87.19    1.70
  -1  -6   3   85.51    1.71
   0   6  -3    0.03    0.10
   0   6  -3    0.03    0.08
   0  -6   3    0.13    0.09
   0  -6   3   -0.02    0.08
   0  -6   3    0.11    0.07
  -1   6  -3  189.32    3.94
  -1   6  -3  200.98    3.72
   1  -6   3  192.89    3.87
   1  -6   3  183.37    3.84
   1  -6   3  195.07    3.72
  -2   6  -3    0.80    0.13
  -2   6  -3    0.90    0.11
   2  -6   3    0.70    0.10
   2  -6   3    0.97    0.10
   2  -6   3    0.87    0.12
  -3   6  -3   36.33    0.80
  -3   6  -3   36.26    0.86
   3  -6   3   36.90    0.80
   3  -6   3   37.55    0.85
   3  -6   3   37.29    0.80
  -4   6  -3    3.09    0.20
  -4   6  -3    2.73    0.19
   4  -6   3    2.99    0.18
   4  -6   3    2.92    0.20
   4  -6   3    2.85    0.15
  -5   6  -3  125.72    2.51
  -5   6  -3  127.65    2.55
  -5   6  -3  124.62    2.65
   5  -6   3  125.61    2.63
   5  -6   3  128.96    2.50
  -6   6  -3    7.43    0.33
  -6   6  -3    6.75    0.23
   6  -6   3    6.72    0.33
   6  -6   3    7.28    0.27
  -7   6  -3    0.02    0.13
  -7   6  -3    0.23    0.09
  -7   6  -3    0.14    0.14
   7  -6   3   -0.17    0.15
   7  -6   3    0.15    0.12
  -8   6  -3    0.03    0.10
  -8   6  -3    0.03    0.14
  -8   6  -3    0.09    0.16
   8  -6   3    0.11    0.18
  -9   6  -3    0.43    0.17
  -9   6  -3    0.47    0.18
   9  -6   3    0.46    0.20
 -10   6  -3    8.64    0.42
 -10   6  -3    8.57    0.39
  10  -6   3    7.51    0.47
 -11   6  -3    9.28    0.46
 -11   6  -3    9.14    0.41
  11  -6   3    9.78    0.50
 -12   6  -3    0.03    0.22
 -12   6  -3    0.41    0.25
  12  -6   3    0.24    0.27
 -13   6  -3    0.82    0.27
 -13   6  -3    0.39    0.27
  13  -6   3    0.39    0.29
 -14   6  -3    4.37    0.41
 -14   6  -3    5.68    0.42
  14  -6   3    5.20    0.48
 -15   6  -3    3.64    0.37
 -15   6  -3    3.18    0.40
  15  -6   3    3.79    0.44
 -16   6  -3   -0.22    0.34
  16  -6   3    0.04    0.34
  17  -6   3    0.66    0.42
  15   5  -3    0.31    0.38
 -15  -5   3   -0.71    0.30
 -15  -5   3   -0.39    0.36
  14   5  -3    1.10    0.38
 -14  -5   3    1.30    0.33
 -14  -5   3    1.08    0.35
  13   5  -3    0.06    0.29
 -13  -5   3    0.35    0.30
 -13  -5   3    0.25    0.25
  12   5  -3    4.18    0.40
 -12  -5   3    4.07    0.39
 -12  -5   3    4.26    0.35
  11   5  -3    2.37    0.31
 -11  -5   3    2.28    0.32
 -11  -5   3    1.97    0.27
  10   5  -3    4.05    0.35
 -10  -5   3    3.84    0.29
 -10  -5   3    4.03    0.35
   9   5  -3    0.37    0.21
  -9  -5   3    0.16    0.21
  -9  -5   3    0.34    0.19
   8   5  -3    1.28    0.22
  -8  -5   3    1.17    0.19
  -8  -5   3    1.07    0.22
  -7  -5   3    9.05    0.33
  -7  -5   3    9.12    0.42
   6   5  -3    1.15    0.19
  -6  -5   3    1.07    0.15
  -6  -5   3    1.19    0.18
   5   5  -3   12.71    0.42
  -5  -5   3   12.38    0.36
  -5  -5   3   12.57    0.42
   4   5  -3   21.20    0.57
  -4  -5   3   20.59    0.50
  -4  -5   3   20.31    0.56
   3   5  -3    0.96    0.14
  -3  -5   3    1.08    0.12
  -3  -5   3    0.84    0.13
   2   5  -3   16.87    0.39
   2   5  -3   16.34    0.46
  -2  -5   3   15.25    0.39
  -2  -5   3   15.77    0.43
  -2  -5   3   15.69    0.34
   1   5  -3   88.93    1.86
   1   5  -3   88.43    1.73
  -1  -5   3   85.24    1.82
  -1  -5   3   87.79    1.76
  -1  -5   3   87.87    1.73
   0   5  -3    3.37    0.15
   0   5  -3    3.37    0.21
   0  -5   3    3.04    0.18
   0  -5   3    3.09    0.16
   0  -5   3    2.94    0.15
  -1   5  -3    0.32    0.10
  -1   5  -3    0.45    0.08
   1  -5   3    0.20    0.08
   1  -5   3    0.38    0.08
   1  -5   3    0.31    0.08
  -2   5  -3    0.27    0.08
  -2   5  -3    0.28    0.09
   2  -5   3    0.27    0.09
   2  -5   3    0.41    0.08
   2  -5   3    0.38    0.08
  -3   5  -3   74.78    1.61
  -3   5  -3   76.27    1.52
   3  -5   3   74.34    1.52
   3  -5   3   77.05    1.55
   3  -5   3   75.68    1.60
  -4   5  -3    3.20    0.17
  -4   5  -3    2.66    0.18
  -4   5  -3    3.16    0.14
   4  -5   3    2.46    0.18
   4  -5   3    2.94    0.17
  -5   5  -3    0.36    0.12
  -5   5  -3    0.02    0.10
  -5   5  -3    0.18    0.07
   5  -5   3    0.14    0.09
   5  -5   3    0.16    0.12
  -6   5  -3    3.07    0.20
  -6   5  -3    2.66    0.19
  -6   5  -3    2.77    0.16
   6  -5   3    2.59    0.22
   6  -5   3    2.96    0.18
  -7   5  -3  129.05    2.65
  -7   5  -3  132.09    2.60
  -7   5  -3  127.72    2.73
   7  -5   3  131.35    2.58
   7  -5   3  130.57    2.74
  -8   5  -3   19.33    0.51
  -8   5  -3   20.27    0.58
  -8   5  -3   19.86    0.54
   8  -5   3   20.58    0.63
  -9   5  -3    1.54    0.20
  -9   5  -3    1.43    0.16
  -9   5  -3    1.10    0.20
   9  -5   3    1.35    0.24
 -10   5  -3    0.00    0.17
 -10   5  -3    0.17    0.17
  10  -5   3    0.10    0.20
 -11   5  -3   21.95    0.65
 -11   5  -3   21.78    0.68
  11  -5   3   22.09    0.73
 -12   5  -3   22.67    0.69
 -12   5  -3   22.52    0.71
  12  -5   3   23.42    0.79
 -13   5  -3    4.44    0.38
 -13   5  -3    4.67    0.36
  13  -5   3    4.36    0.40
 -14   5  -3    1.45    0.33
 -14   5  -3    1.32    0.29
  14  -5   3    1.99    0.35
 -15   5  -3    6.84    0.47
 -15   5  -3    7.59    0.49
  15  -5   3    6.89    0.53
 -16   5  -3    4.78    0.46
  16  -5   3    4.62    0.49
  17  -5   3    2.73    0.46
  15   4  -3    2.01    0.42
 -15  -4   3    2.27    0.36
 -15  -4   3    1.55    0.40
  14   4  -3    0.73    0.35
 -14  -4   3    0.50    0.31
 -14  -4   3    0.32    0.28
  13   4  -3    3.19    0.39
 -13  -4   3    2.71    0.37
 -13  -4   3    2.29    0.31
  12   4  -3    5.00    0.42
 -12  -4   3    4.05    0.37
 -12  -4   3    4.12    0.32
  11   4  -3   18.11    0.64
 -11  -4   3   17.33    0.66
 -11  -4   3   16.97    0.55
  10   4  -3   21.34    0.70
 -10  -4   3   20.92    0.67
 -10  -4   3   19.93    0.59
   9   4  -3   -0.01    0.20
  -9  -4   3    0.01    0.16
  -9  -4   3   -0.02    0.19
   8   4  -3    1.87    0.23
  -8  -4   3    1.83    0.23
  -8  -4   3    1.90    0.19
   7   4  -3   34.24    0.88
  -7  -4   3   33.89    0.87
  -7  -4   3   35.68    0.80
   6   4  -3    8.72    0.21
  -6  -4   3    9.10    0.29
  -6  -4   3    8.77    0.37
   5   4  -3   79.96    1.72
  -5  -4   3   78.15    1.70
  -5  -4   3   79.84    1.60
   4   4  -3   -0.07    0.10
  -4  -4   3    0.29    0.11
  -4  -4   3    0.10    0.08
   3   4  -3   86.41    1.83
  -3  -4   3   86.82    1.82
  -3  -4   3   86.62    1.71
   2   4  -3   44.46    0.99
  -2  -4   3   43.85    0.97
  -2  -4   3   44.73    0.91
   1   4  -3  328.06    6.26
   1   4  -3  329.81    6.62
  -1  -4   3  332.64    6.26
  -1  -4   3  331.36    6.56
  -1  -4   3  324.89    6.48
   0   4  -3   16.55    0.43
   0   4  -3   17.42    0.39
   0  -4   3   15.84    0.38
   0  -4   3   17.07    0.39
   0  -4   3   16.73    0.41
  -1   4  -3  145.39    2.92
  -1   4  -3  142.07    2.76
   1  -4   3  144.70    2.88
   1  -4   3  142.63    2.86
   1  -4   3  140.46    2.76
  -2   4  -3    7.00    0.24
  -2   4  -3    7.39    0.22
   2  -4   3    7.45    0.25
   2  -4   3    7.54    0.22
   2  -4   3    7.19    0.21
  -3   4  -3  129.57    2.73
   3  -4   3  136.62    2.59
   3  -4   3  135.06    2.71
   3  -4   3  132.39    2.68
  -4   4  -3    0.24    0.09
  -4   4  -3    0.28    0.07
  -4   4  -3    0.24    0.08
   4  -4   3    0.35    0.10
   4  -4   3    0.25    0.08
  -5   4  -3   69.82    1.49
  -5   4  -3   70.11    1.42
  -5   4  -3   70.04    1.44
   5  -4   3   70.20    1.42
  -6   4  -3    6.57    0.28
  -6   4  -3    7.11    0.24
   6  -4   3    7.18    0.31
   6  -4   3    6.80    0.25
  -7   4  -3   85.56    1.79
  -7   4  -3   83.93    1.75
  -7   4  -3   86.09    1.84
   7  -4   3   86.68    1.75
   7  -4   3   87.35    1.87
  -8   4  -3    1.27    0.17
  -8   4  -3    1.67    0.16
  -8   4  -3    1.48    0.17
   8  -4   3    1.16    0.20
   8  -4   3    1.40    0.16
  -9   4  -3   20.96    0.57
  -9   4  -3   20.30    0.57
  -9   4  -3   20.72    0.60
   9  -4   3   20.95    0.64
 -10   4  -3    8.39    0.37
 -10   4  -3    9.05    0.40
 -10   4  -3    9.19    0.37
  10  -4   3    8.13    0.42
 -11   4  -3    7.27    0.36
 -11   4  -3    8.32    0.39
  11  -4   3    7.18    0.45
 -12   4  -3    6.26    0.37
 -12   4  -3    5.37    0.36
  12  -4   3    4.30    0.38
 -13   4  -3    1.78    0.30
 -13   4  -3    2.12    0.28
  13  -4   3    2.35    0.35
 -14   4  -3   12.42    0.53
 -14   4  -3   12.39    0.58
  14  -4   3   11.32    0.58
 -15   4  -3    1.56    0.32
 -15   4  -3    1.72    0.36
  15  -4   3    1.85    0.38
 -16   4  -3   -0.45    0.32
  16  -4   3   -0.29    0.33
  16   3  -3    2.57    0.46
 -16  -3   3    1.53    0.34
  15   3  -3    0.49    0.36
 -15  -3   3    0.34    0.29
 -15  -3   3    0.66    0.32
  14   3  -3   -0.02    0.32
 -14  -3   3    0.76    0.28
 -14  -3   3    0.55    0.32
  13   3  -3    1.91    0.34
 -13  -3   3    1.31    0.26
 -13  -3   3    2.01    0.32
  12   3  -3    0.46    0.26
 -12  -3   3    0.35    0.22
 -12  -3   3    0.32    0.24
  11   3  -3    2.53    0.30
 -11  -3   3    2.55    0.26
 -11  -3   3    2.94    0.31
  10   3  -3    3.94    0.31
 -10  -3   3    4.50    0.32
 -10  -3   3    3.37    0.26
   9   3  -3    2.83    0.26
  -9  -3   3    3.27    0.24
  -9  -3   3    3.35    0.28
   8   3  -3    3.64    0.19
   8   3  -3    4.36    0.30
  -8  -3   3    4.12    0.27
  -8  -3   3    3.69    0.23
   7   3  -3    2.72    0.23
   7   3  -3    2.53    0.15
  -7  -3   3    3.31    0.20
  -7  -3   3    2.60    0.21
   6   3  -3    2.85    0.21
   6   3  -3    2.75    0.13
  -6  -3   3    2.42    0.16
  -6  -3   3    2.63    0.20
   5   3  -3    7.58    0.19
   5   3  -3    7.65    0.29
  -5  -3   3    7.42    0.23
  -5  -3   3    7.36    0.30
   4   3  -3    1.63    0.14
  -4  -3   3    1.18    0.13
  -4  -3   3    1.19    0.10
  -3  -3   3   32.28    0.74
  -3  -3   3   33.12    0.68
   2   3  -3    8.89    0.26
  -2  -3   3    8.77    0.26
  -2  -3   3    8.55    0.22
   1   3  -3  165.12    3.36
  -1  -3   3  166.11    3.33
  -1  -3   3  167.34    3.17
  -1  -3   3  165.50    3.26
   0   3  -3    0.19    0.06
   0   3  -3    0.22    0.05
   0  -3   3    0.23    0.05
   0  -3   3    0.24    0.06
   0  -3   3    0.21    0.05
  -1   3  -3  227.51    4.46
  -1   3  -3  234.92    4.71
   1  -3   3  227.29    4.63
   1  -3   3  241.96    4.46
   1  -3   3  239.86    4.66
  -2   3  -3   -0.03    0.05
  -2   3  -3    0.00    0.06
   2  -3   3   -0.07    0.05
   2  -3   3    0.00    0.06
   2  -3   3    0.07    0.05
  -3   3  -3  128.15    2.55
  -3   3  -3  127.08    2.47
  -3   3  -3  126.97    2.59
   3  -3   3  130.68    2.47
   3  -3   3  123.48    2.58
  -4   3  -3    0.06    0.06
  -4   3  -3    0.10    0.08
  -4   3  -3    0.02    0.07
   4  -3   3   -0.05    0.09
   4  -3   3   -0.08    0.07
  -5   3  -3  289.49    5.81
  -5   3  -3  287.87    5.59
  -5   3  -3  293.30    5.88
   5  -3   3  296.34    5.59
   5  -3   3  292.94    5.83
  -6   3  -3    0.87    0.13
  -6   3  -3    1.02    0.13
  -6   3  -3    1.05    0.11
   6  -3   3    0.72    0.11
   6  -3   3    0.97    0.16
  -7   3  -3   39.41    0.87
  -7   3  -3   37.37    0.88
  -7   3  -3   39.17    0.91
   7  -3   3   38.82    0.94
   7  -3   3   39.97    0.86
  -8   3  -3   17.36    0.50
  -8   3  -3   18.62    0.52
  -8   3  -3   18.28    0.50
   8  -3   3   17.52    0.48
   8  -3   3   17.88    0.55
  -9   3  -3   69.49    1.53
  -9   3  -3   68.71    1.46
  -9   3  -3   66.40    1.50
   9  -3   3   68.73    1.56
 -10   3  -3   -0.06    0.14
 -10   3  -3    0.19    0.16
 -10   3  -3    0.25    0.18
  10  -3   3   -0.10    0.20
 -11   3  -3    0.64    0.22
 -11   3  -3    0.89    0.20
 -11   3  -3    0.50    0.19
  11  -3   3    0.58    0.24
 -12   3  -3   20.55    0.63
 -12   3  -3   21.12    0.67
  12  -3   3   20.75    0.69
 -13   3  -3   19.09    0.65
 -13   3  -3   19.76    0.68
  13  -3   3   20.12    0.72
 -14   3  -3    1.66    0.30
 -14   3  -3    1.93    0.33
  14  -3   3    1.69    0.32
 -15   3  -3    1.80    0.36
 -15   3  -3    1.85    0.32
  15  -3   3    2.18    0.38
  16  -3   3    7.02    0.53
  16   2  -3   -0.09    0.37
 -16  -2   3    0.32    0.31
  15   2  -3    2.53    0.41
 -15  -2   3    3.17    0.34
  14   2  -3    8.94    0.53
 -14  -2   3    7.76    0.53
 -14  -2   3    8.03    0.45
  13   2  -3    0.22    0.27
 -13  -2   3   -0.08    0.20
 -13  -2   3   -0.11    0.25
  12   2  -3    0.61    0.27
 -12  -2   3   -0.01    0.20
 -12  -2   3    0.58    0.24
  11   2  -3    1.97    0.27
 -11  -2   3    1.81    0.25
 -11  -2   3    1.51    0.22
  10   2  -3   23.21    0.70
 -10  -2   3   23.43    0.69
 -10  -2   3   22.82    0.69
 -10  -2   3   22.78    0.62
   9   2  -3   13.58    0.41
  -9  -2   3   13.23    0.48
  -9  -2   3   13.42    0.47
  -9  -2   3   14.22    0.42
   8   2  -3    0.38    0.12
  -8  -2   3    0.65    0.14
  -8  -2   3    0.54    0.15
  -8  -2   3    0.51    0.17
   7   2  -3   14.21    0.38
  -7  -2   3   14.79    0.39
  -7  -2   3   14.19    0.45
  -7  -2   3   14.40    0.45
   6   2  -3    5.15    0.20
  -6  -2   3    5.81    0.21
  -6  -2   3    5.11    0.25
  -6  -2   3    5.44    0.26
  -6  -2   3    5.07    0.20
   5   2  -3    3.60    0.14
   5   2  -3    3.48    0.21
  -5  -2   3    3.75    0.16
  -5  -2   3    3.12    0.19
  -5  -2   3    3.19    0.19
  -5  -2   3    3.33    0.15
   4   2  -3    1.63    0.13
   4   2  -3    1.55    0.09
  -4  -2   3    1.82    0.13
  -4  -2   3    1.60    0.10
  -4  -2   3    1.72    0.11
   3   2  -3    7.38    0.17
   3   2  -3    7.28    0.25
  -3  -2   3    7.97    0.24
  -3  -2   3    8.09    0.20
  -3  -2   3    7.48    0.19
   2   2  -3    1.13    0.09
  -2  -2   3    1.08    0.06
  -2  -2   3    1.10    0.05
  -2  -2   3    1.09    0.06
  -2  -2   3    1.30    0.09
   1   2  -3  528.24   10.94
  -1  -2   3  541.72   10.31
  -1  -2   3  540.28   10.82
  -1  -2   3  547.01   10.30
  -1  -2   3  548.38   10.66
   0   2  -3   11.07    0.27
   0  -2   3   10.98    0.26
   0  -2   3   10.67    0.27
   0  -2   3   11.10    0.24
  -1   2  -3    9.20    0.22
  -1   2  -3    9.70    0.24
   1  -2   3    9.67    0.24
   1  -2   3    9.64    0.25
   1  -2   3    9.40    0.22
  -2   2  -3   15.15    0.34
  -2   2  -3   15.17    0.35
  -2   2  -3   14.71    0.35
   2  -2   3   15.06    0.34
   2  -2   3   14.76    0.37
  -3   2  -3    3.45    0.14
  -3   2  -3    3.69    0.14
  -3   2  -3    3.43    0.15
   3  -2   3    3.81    0.17
   3  -2   3    3.50    0.15
  -4   2  -3   18.93    0.44
  -4   2  -3   18.78    0.44
  -4   2  -3   18.78    0.44
   4  -2   3   18.02    0.48
   4  -2   3   18.52    0.43
  -5   2  -3   60.26    1.26
  -5   2  -3   62.41    1.30
  -5   2  -3   61.36    1.31
   5  -2   3   62.69    1.26
   5  -2   3   62.00    1.34
  -6   2  -3   17.15    0.44
  -6   2  -3   17.73    0.46
  -6   2  -3   16.94    0.45
   6  -2   3   17.78    0.49
   6  -2   3   17.22    0.44
  -7   2  -3   10.29    0.35
  -7   2  -3   10.59    0.35
  -7   2  -3   10.76    0.34
   7  -2   3   10.40    0.38
   7  -2   3   10.95    0.34
  -8   2  -3    6.32    0.28
  -8   2  -3    6.14    0.30
  -8   2  -3    6.92    0.30
   8  -2   3    5.99    0.32
   8  -2   3    6.72    0.28
  -9   2  -3   37.65    0.92
  -9   2  -3   36.45    0.87
  -9   2  -3   37.64    0.92
   9  -2   3   38.26    0.96
 -10   2  -3    2.41    0.23
 -10   2  -3    2.81    0.25
 -10   2  -3    2.44    0.22
  10  -2   3    2.36    0.25
 -11   2  -3    2.05    0.24
 -11   2  -3    2.41    0.25
 -11   2  -3    2.48    0.27
  11  -2   3    2.45    0.27
 -12   2  -3    0.99    0.24
 -12   2  -3    1.06    0.23
 -12   2  -3    1.13    0.25
  12  -2   3    1.13    0.25
 -13   2  -3    4.39    0.34
 -13   2  -3    4.56    0.37
  13  -2   3    4.11    0.38
 -14   2  -3    9.16    0.48
 -14   2  -3   10.30    0.53
  14  -2   3   11.55    0.56
 -15   2  -3    2.28    0.33
 -15   2  -3    2.22    0.37
  15  -2   3    1.98    0.36
  16   1  -3    3.75    0.47
 -16  -1   3    4.29    0.40
  15   1  -3    0.24    0.33
 -15  -1   3    0.38    0.26
  14   1  -3    1.85    0.33
 -14  -1   3    1.53    0.31
 -14  -1   3    1.88    0.29
 -14  -1   3    1.58    0.34
 -13  -1   3    2.15    0.27
 -13  -1   3    3.05    0.32
 -13  -1   3    2.58    0.36
 -12  -1   3   22.09    0.64
 -12  -1   3   22.41    0.70
 -12  -1   3   21.71    0.74
 -11  -1   3    0.36    0.22
 -11  -1   3    0.46    0.18
 -11  -1   3    0.40    0.20
  10   1  -3    3.82    0.25
 -10  -1   3    4.54    0.33
 -10  -1   3    4.61    0.30
 -10  -1   3    4.22    0.26
   9   1  -3    6.82    0.30
  -9  -1   3    6.40    0.29
  -9  -1   3    6.90    0.35
  -9  -1   3    7.17    0.34
   8   1  -3   10.63    0.34
  -8  -1   3   10.44    0.33
  -8  -1   3   10.29    0.38
  -8  -1   3   10.02    0.40
   7   1  -3   23.13    0.57
  -7  -1   3   22.93    0.55
  -7  -1   3   24.62    0.55
  -7  -1   3   23.75    0.61
   6   1  -3    1.25    0.11
  -6  -1   3    1.28    0.13
  -6  -1   3    1.26    0.10
  -6  -1   3    1.53    0.15
  -6  -1   3    1.24    0.11
   5   1  -3   38.11    0.82
  -5  -1   3   38.48    0.88
  -5  -1   3   39.59    0.80
  -5  -1   3   39.33    0.86
  -5  -1   3   38.58    0.80
   4   1  -3   41.99    0.87
  -4  -1   3   41.69    0.91
  -4  -1   3   42.31    0.84
  -4  -1   3   42.05    0.84
   3   1  -3  233.23    4.65
  -3  -1   3  234.08    4.73
  -3  -1   3  243.03    4.49
  -3  -1   3  238.25    4.49
  -2  -1   3   40.43    0.81
  -2  -1   3   39.75    0.85
  -2  -1   3   41.60    0.78
  -2  -1   3   40.11    0.78
  -2  -1   3   39.46    0.86
   1   1  -3   96.46    1.92
  -1  -1   3   94.56    1.91
  -1  -1   3   94.16    1.87
  -1  -1   3   94.40    1.79
  -1  -1   3   93.64    1.79
   0   1  -3    0.17    0.03
   0  -1   3    0.21    0.03
   0  -1   3    0.30    0.04
   0  -1   3    0.15    0.04
   0  -1   3    0.11    0.03
  -1   1  -3  398.11    7.71
  -1   1  -3  399.95    8.11
   1  -1   3  410.77    8.06
   1  -1   3  394.52    8.04
   1  -1   3  414.41    7.69
  -2   1  -3    3.88    0.13
  -2   1  -3    3.83    0.13
  -2   1  -3    3.89    0.12
   2  -1   3    4.16    0.13
  -3   1  -3    0.28    0.06
  -3   1  -3    0.19    0.05
  -3   1  -3    0.14    0.06
   3  -1   3    0.17    0.07
   3  -1   3    0.16    0.06
  -4   1  -3   24.14    0.55
  -4   1  -3   23.94    0.57
  -4   1  -3   24.69    0.54
   4  -1   3   24.36    0.59
   4  -1   3   25.66    0.55
  -5   1  -3  195.93    3.97
  -5   1  -3  194.94    3.96
  -5   1  -3  195.24    3.79
   5  -1   3  196.58    3.95
   5  -1   3  198.94    3.79
  -6   1  -3    9.65    0.30
  -6   1  -3    9.14    0.32
  -6   1  -3    8.84    0.29
   6  -1   3    9.10    0.28
   6  -1   3    8.87    0.32
  -7   1  -3    7.98    0.28
  -7   1  -3    8.49    0.30
  -7   1  -3    7.95    0.32
   7  -1   3    7.39    0.33
   7  -1   3    7.82    0.28
  -8   1  -3    1.76    0.17
  -8   1  -3    2.19    0.20
  -8   1  -3    2.10    0.19
   8  -1   3    1.87    0.20
   8  -1   3    2.10    0.18
  -9   1  -3   57.42    1.32
  -9   1  -3   57.22    1.34
  -9   1  -3   60.00    1.27
   9  -1   3   58.56    1.34
 -10   1  -3    0.01    0.18
 -10   1  -3    0.36    0.17
 -10   1  -3    0.32    0.19
  10  -1   3    0.17    0.19
 -11   1  -3    7.23    0.36
 -11   1  -3    7.02    0.37
 -11   1  -3    7.43    0.42
  11  -1   3    6.97    0.40
 -12   1  -3    4.06    0.31
 -12   1  -3    3.46    0.33
 -12   1  -3    3.64    0.32
  12  -1   3    2.92    0.31
 -13   1  -3    1.18    0.29
 -13   1  -3    0.66    0.27
 -13   1  -3    0.46    0.25
  13  -1   3    0.73    0.26
 -14   1  -3    4.71    0.38
 -14   1  -3    5.05    0.41
  14  -1   3    5.17    0.41
 -15   1  -3   -0.22    0.28
 -15   1  -3    0.45    0.33
  17   0  -3    0.54    0.37
 -17   0   3    0.73    0.33
  16   0  -3    0.71    0.38
 -16   0   3    1.12    0.40
 -16   0   3    0.44    0.30
 -15   0   3    1.80    0.39
 -15   0   3    2.44    0.32
 -14   0   3    2.82    0.30
 -14   0   3    2.77    0.36
 -13   0   3    0.22    0.26
 -13   0   3    0.39    0.22
 -13   0   3    0.17    0.22
 -12   0   3   18.98    0.63
 -12   0   3   18.07    0.56
 -12   0   3   18.54    0.66
  11   0  -3    3.55    0.27
 -11   0   3    3.30    0.32
 -11   0   3    3.66    0.26
 -11   0   3    3.40    0.27
  10   0  -3   14.41    0.47
 -10   0   3   13.76    0.42
 -10   0   3   13.86    0.47
 -10   0   3   13.99    0.51
   9   0  -3   12.96    0.42
  -9   0   3   12.59    0.39
  -9   0   3   13.31    0.46
  -9   0   3   13.36    0.43
   8   0  -3    0.45    0.13
  -8   0   3    0.51    0.12
  -8   0   3    0.59    0.17
  -8   0   3    0.46    0.13
   7   0  -3    5.35    0.23
  -7   0   3    4.94    0.26
  -7   0   3    5.16    0.20
  -7   0   3    5.11    0.24
  -7   0   3    5.23    0.21
   6   0  -3    1.72    0.13
  -6   0   3    1.90    0.11
  -6   0   3    1.71    0.11
  -6   0   3    1.94    0.14
  -6   0   3    1.54    0.15
   5   0  -3    1.41    0.11
  -5   0   3    1.49    0.11
  -5   0   3    1.35    0.13
  -5   0   3    1.76    0.10
  -5   0   3    1.65    0.11
   4   0  -3    0.66    0.07
  -4   0   3    0.37    0.07
  -4   0   3    0.64    0.06
  -4   0   3    0.69    0.06
  -4   0   3    0.48    0.09
   3   0  -3   30.45    0.63
  -3   0   3   30.78    0.59
  -3   0   3   29.65    0.67
  -3   0   3   29.82    0.59
  -3   0   3   29.89    0.65
  -2   0   3   13.86    0.30
  -2   0   3   13.42    0.31
  -2   0   3   13.49    0.32
  -1   0   3   46.42    0.96
  -1   0   3   46.09    0.96
  -1   0   3   46.39    0.94
   0   0   3   21.92    0.43
   0   0   3   21.71    0.45
   0   0   3   21.97    0.43
   0   0   3   22.40    0.47
  -1   0  -3  188.95    3.82
  -1   0  -3  191.61    3.64
   1   0   3  196.15    3.79
   1   0   3  189.50    3.64
  -2   0  -3    3.15    0.10
  -2   0  -3    3.23    0.13
  -2   0  -3    3.28    0.12
   2   0   3    3.44    0.13
   2   0   3    3.70    0.12
  -3   0  -3  283.91    5.30
  -3   0  -3  280.17    5.56
  -3   0  -3  274.43    5.55
   3   0   3  275.47    5.31
   3   0   3  279.44    5.51
  -4   0  -3    5.23    0.17
  -4   0  -3    4.72    0.18
  -4   0  -3    4.46    0.20
   4   0   3    4.69    0.18
   4   0   3    4.98    0.20
  -5   0  -3    5.32    0.21
  -5   0  -3    5.65    0.23
  -5   0  -3    5.60    0.21
   5   0   3    5.38    0.20
   5   0   3    6.01    0.24
  -6   0  -3   21.51    0.56
  -6   0  -3   21.50    0.53
  -6   0  -3   20.24    0.51
   6   0   3   21.50    0.51
   6   0   3   20.79    0.55
  -7   0  -3   59.64    1.30
  -7   0  -3   59.67    1.32
  -7   0  -3   59.14    1.25
   7   0   3   57.73    1.30
   7   0   3   59.62    1.24
  -8   0  -3    9.06    0.34
  -8   0  -3    8.87    0.39
  -8   0  -3    9.42    0.34
   8   0   3    8.83    0.34
   8   0   3    9.03    0.31
  -9   0  -3    4.41    0.29
  -9   0  -3    4.61    0.29
  -9   0  -3    4.85    0.33
   9   0   3    4.78    0.30
 -10   0  -3   19.06    0.58
 -10   0  -3   18.72    0.55
 -10   0  -3   18.37    0.60
  10   0   3   18.87    0.58
 -11   0  -3    0.89    0.23
 -11   0  -3    1.33    0.24
 -11   0  -3    1.11    0.22
  11   0   3    0.72    0.20
 -12   0  -3    7.99    0.44
 -12   0  -3    8.73    0.50
  12   0   3    9.71    0.46
 -13   0  -3    0.48    0.27
 -13   0  -3    1.14    0.29
 -13   0  -3    1.00    0.26
  13   0   3    1.18    0.26
 -14   0  -3    5.22    0.42
 -14   0  -3    4.58    0.41
 -14   0  -3    4.81    0.38
 -15   0  -3    5.49    0.42
  15   0   3    5.23    0.44
 -17   1   3    0.24    0.29
 -17   1   3    0.29    0.40
 -16   1   3    7.71    0.48
 -16   1   3    7.41    0.56
 -15   1   3    0.56    0.32
 -15   1   3    0.40    0.26
 -14   1   3    1.19    0.33
 -14   1   3    1.14    0.25
 -13   1   3    3.61    0.29
 -13   1   3    3.93    0.36
  12  -1  -3    3.10    0.29
 -12   1   3    3.71    0.27
 -12   1   3    3.75    0.28
 -12   1   3    2.87    0.31
  11  -1  -3   18.92    0.59
 -11   1   3   19.08    0.55
 -11   1   3   18.90    0.57
 -11   1   3   19.31    0.64
  10  -1  -3   -0.02    0.16
 -10   1   3    0.17    0.14
 -10   1   3    0.12    0.19
 -10   1   3   -0.01    0.14
   9  -1  -3    1.50    0.19
  -9   1   3    1.39    0.16
  -9   1   3    1.43    0.20
  -9   1   3    1.56    0.16
   8  -1  -3    4.31    0.25
  -8   1   3    5.51    0.22
  -8   1   3    4.22    0.27
  -8   1   3    4.56    0.23
  -8   1   3    4.74    0.22
   7  -1  -3   65.88    1.38
  -7   1   3   63.80    1.36
  -7   1   3   65.06    1.30
  -7   1   3   62.09    1.30
  -7   1   3   63.95    1.42
   6  -1  -3   -0.03    0.09
  -6   1   3    0.09    0.08
  -6   1   3    0.04    0.07
  -6   1   3    0.33    0.07
  -6   1   3    0.13    0.11
   5  -1  -3   11.41    0.31
  -5   1   3   11.24    0.34
  -5   1   3   11.59    0.27
  -5   1   3   11.40    0.28
  -5   1   3   11.43    0.30
   4  -1  -3    2.26    0.13
  -4   1   3    2.03    0.11
  -4   1   3    2.23    0.09
  -4   1   3    2.17    0.09
  -4   1   3    2.13    0.15
   3  -1  -3    2.18    0.10
  -3   1   3    2.26    0.10
  -3   1   3    2.13    0.07
  -3   1   3    2.15    0.12
  -3   1   3    2.23    0.07
  -2   1   3    0.55    0.06
  -2   1   3    0.54    0.05
  -2   1   3    0.51    0.06
  -1   1   3  113.87    2.23
  -1   1   3  112.00    2.26
  -1   1   3  110.88    2.24
   0  -1  -3    0.25    0.04
   0   1   3    0.24    0.03
   0   1   3    0.29    0.03
   0   1   3    0.26    0.03
   0   1   3    0.27    0.04
  -1  -1  -3  113.89    2.33
  -1  -1  -3  117.13    2.21
   1   1   3  115.38    2.21
   1   1   3  112.41    2.31
   1   1   3  118.12    2.30
  -2  -1  -3    4.05    0.13
   2   1   3    4.06    0.12
   2   1   3    3.92    0.15
  -3  -1  -3   52.34    1.04
  -3  -1  -3   52.72    1.07
  -3  -1  -3   51.03    1.11
   3   1   3   51.57    1.04
   3   1   3   50.55    1.07
   3   1   3   52.37    1.08
  -4  -1  -3   48.91    1.04
  -4  -1  -3   48.74    1.07
  -4  -1  -3   49.11    1.01
   4   1   3   50.36    1.01
   4   1   3   48.30    1.04
  -5  -1  -3    4.03    0.18
   5   1   3    4.05    0.19
   5   1   3    3.76    0.19
  -6  -1  -3   22.63    0.55
  -6  -1  -3   22.77    0.60
  -6  -1  -3   23.11    0.56
   6   1   3   23.11    0.57
   6   1   3   22.82    0.55
  -7  -1  -3   19.82    0.53
  -7  -1  -3   20.44    0.54
  -7  -1  -3   21.09    0.58
   7   1   3   20.36    0.51
   7   1   3   20.07    0.54
  -8  -1  -3   30.63    0.77
  -8  -1  -3   30.80    0.74
  -8  -1  -3   31.27    0.80
   8   1   3   30.21    0.76
  -9  -1  -3    2.44    0.23
  -9  -1  -3    2.64    0.23
  -9  -1  -3    2.57    0.26
   9   1   3    2.26    0.21
 -10  -1  -3   19.54    0.60
 -10  -1  -3   19.05    0.65
 -10  -1  -3   18.78    0.56
  10   1   3   20.39    0.58
 -11  -1  -3    2.83    0.27
 -11  -1  -3    2.57    0.28
 -11  -1  -3    2.69    0.29
  11   1   3    2.73    0.27
 -12  -1  -3    1.49    0.28
 -12  -1  -3    1.51    0.27
  12   1   3    1.83    0.26
  12   1   3    1.70    0.27
 -13  -1  -3   -0.13    0.22
 -13  -1  -3   -0.34    0.24
  13   1   3    0.03    0.25
 -14  -1  -3    4.01    0.40
 -14  -1  -3    3.50    0.36
  14   1   3    3.81    0.39
 -17   2   3    0.03    0.29
 -17   2   3   -0.14    0.38
 -16   2   3    0.59    0.37
 -16   2   3    0.23    0.27
 -15   2   3    3.63    0.42
 -15   2   3    4.22    0.36
 -14   2   3    1.70    0.27
 -14   2   3    1.83    0.35
  13  -2  -3    4.55    0.36
 -13   2   3    4.77    0.40
 -13   2   3    4.44    0.31
  12  -2  -3    0.27    0.22
 -12   2   3    0.35    0.17
 -12   2   3    0.44    0.25
  11  -2  -3    6.51    0.38
 -11   2   3    6.31    0.38
 -11   2   3    6.36    0.31
 -11   2   3    6.44    0.32
  10  -2  -3    2.41    0.25
 -10   2   3    2.28    0.20
 -10   2   3    2.40    0.19
 -10   2   3    2.75    0.27
   9  -2  -3    4.53    0.27
  -9   2   3    4.68    0.32
  -9   2   3    4.67    0.24
  -9   2   3    4.57    0.24
   8  -2  -3    4.76    0.28
  -8   2   3    4.91    0.22
  -8   2   3    5.55    0.22
  -8   2   3    5.21    0.30
  -8   2   3    4.99    0.23
   7  -2  -3   16.76    0.47
  -7   2   3   16.27    0.42
  -7   2   3   17.19    0.50
  -7   2   3   17.55    0.43
  -7   2   3   17.76    0.42
   6  -2  -3    0.39    0.11
  -6   2   3    0.23    0.07
  -6   2   3    0.13    0.07
  -6   2   3    0.06    0.07
  -6   2   3    0.15    0.11
   5  -2  -3  108.22    2.23
  -5   2   3  110.14    2.20
  -5   2   3  111.81    2.12
  -5   2   3  109.66    2.29
  -5   2   3  109.01    2.12
   4  -2  -3    0.51    0.08
  -4   2   3    0.57    0.06
  -4   2   3    0.59    0.06
  -4   2   3    0.54    0.06
  -4   2   3    0.36    0.08
   3  -2  -3   24.46    0.54
  -3   2   3   24.57    0.48
  -3   2   3   24.17    0.48
  -3   2   3   24.01    0.50
  -3   2   3   23.27    0.55
   2  -2  -3    0.66    0.05
  -2   2   3    0.68    0.04
  -2   2   3    0.57    0.04
  -2   2   3    0.69    0.07
  -2   2   3    0.84    0.07
   1  -2  -3  188.91    3.76
  -1   2   3  190.73    3.75
  -1   2   3  189.02    3.80
  -1   2   3  192.89    3.59
  -1   2   3  187.00    3.59
   0  -2  -3   82.01    1.66
   0   2   3   82.00    1.58
   0   2   3   82.83    1.65
   0   2   3   80.95    1.66
  -1  -2  -3    4.73    0.17
  -1  -2  -3    5.08    0.14
   1   2   3    5.01    0.15
   1   2   3    4.93    0.15
  -2  -2  -3    2.17    0.11
  -2  -2  -3    2.57    0.14
   2   2   3    2.37    0.12
   2   2   3    2.41    0.11
   2   2   3    2.37    0.11
  -3  -2  -3   42.49    0.86
  -3  -2  -3   41.51    0.93
   3   2   3   40.90    0.86
   3   2   3   42.85    0.89
   3   2   3   41.53    0.89
  -4  -2  -3   25.84    0.57
  -4  -2  -3   25.15    0.62
   4   2   3   24.84    0.58
   4   2   3   25.35    0.57
   4   2   3   25.63    0.58
  -5  -2  -3    0.14    0.11
  -5  -2  -3    0.12    0.08
   5   2   3    0.08    0.09
   5   2   3   -0.05    0.09
   5   2   3    0.02    0.08
  -6  -2  -3    3.43    0.20
  -6  -2  -3    3.34    0.23
   6   2   3    3.59    0.20
   6   2   3    3.68    0.21
  -7  -2  -3   19.00    0.50
  -7  -2  -3   17.46    0.55
   7   2   3   17.78    0.49
   7   2   3   18.27    0.51
   7   2   3   19.03    0.49
  -8  -2  -3    4.43    0.30
  -8  -2  -3    4.47    0.27
   8   2   3    5.23    0.29
   8   2   3    5.05    0.26
  -9  -2  -3    0.70    0.17
  -9  -2  -3    0.89    0.21
   9   2   3    0.87    0.17
   9   2   3    0.71    0.18
 -10  -2  -3    1.24    0.22
 -10  -2  -3    1.17    0.25
  10   2   3    1.69    0.21
  10   2   3    1.34    0.22
 -11  -2  -3    1.97    0.30
 -11  -2  -3    2.23    0.27
  11   2   3    2.10    0.24
  11   2   3    1.80    0.26
 -12  -2  -3   14.22    0.53
 -12  -2  -3   14.51    0.61
  12   2   3   15.08    0.59
 -13  -2  -3    3.27    0.34
 -13  -2  -3    3.58    0.40
  13   2   3    3.21    0.35
 -14  -2  -3    5.50    0.45
 -14  -2  -3    5.42    0.42
  14   2   3    5.95    0.45
 -15  -2  -3    2.58    0.42
 -17   3   3    1.16    0.34
 -17   3   3    1.05    0.42
 -16   3   3    6.62    0.52
 -16   3   3    7.82    0.47
 -15   3   3   12.91    0.54
 -15   3   3   12.99    0.64
  14  -3  -3    3.46    0.37
 -14   3   3    3.70    0.38
 -14   3   3    3.81    0.32
  13  -3  -3   -0.42    0.23
 -13   3   3   -0.32    0.26
 -13   3   3    0.11    0.19
  12  -3  -3    9.31    0.47
 -12   3   3    8.20    0.38
 -12   3   3    9.27    0.48
  11  -3  -3   20.56    0.64
 -11   3   3   20.52    0.56
 -11   3   3   19.96    0.67
  10  -3  -3   14.12    0.48
 -10   3   3   13.55    0.49
 -10   3   3   13.42    0.39
 -10   3   3   12.00    0.40
   9  -3  -3    1.98    0.22
  -9   3   3    2.02    0.15
  -9   3   3    2.11    0.24
  -9   3   3    1.84    0.17
   8  -3  -3    7.07    0.31
  -8   3   3    6.95    0.26
  -8   3   3    7.17    0.33
  -8   3   3    7.37    0.24
   7  -3  -3  255.25    5.12
  -7   3   3  252.33    4.90
  -7   3   3  253.37    5.22
  -7   3   3  262.46    4.91
  -7   3   3  255.30    5.08
   6  -3  -3    0.23    0.10
  -6   3   3    0.25    0.08
  -6   3   3    0.18    0.06
  -6   3   3    0.22    0.12
  -6   3   3    0.19    0.07
   5  -3  -3   49.40    1.08
  -5   3   3   49.25    1.11
  -5   3   3   50.15    1.02
  -5   3   3   51.38    1.01
  -5   3   3   50.28    1.01
   4  -3  -3   13.54    0.35
  -4   3   3   13.43    0.30
  -4   3   3   13.21    0.29
  -4   3   3   13.11    0.31
  -4   3   3   13.14    0.37
   3  -3  -3   10.13    0.22
  -3   3   3    9.85    0.24
  -3   3   3    9.76    0.24
  -3   3   3    9.74    0.29
   2  -3  -3    4.72    0.13
  -2   3   3    4.75    0.18
  -2   3   3    4.54    0.13
  -2   3   3    4.59    0.14
  -2   3   3    4.53    0.18
   1  -3  -3    3.56    0.13
  -1   3   3    3.49    0.15
  -1   3   3    3.93    0.13
  -1   3   3    4.08    0.15
   0  -3  -3   49.06    1.03
   0  -3  -3   49.42    0.97
   0   3   3   49.06    1.04
   0   3   3   48.82    0.98
   0   3   3   49.22    1.02
  -1  -3  -3  266.47    5.00
  -1  -3  -3  263.03    5.24
   1   3   3  261.35    5.00
   1   3   3  255.44    5.26
   1   3   3  266.28    5.18
  -2  -3  -3   28.31    0.65
  -2  -3  -3   28.41    0.60
   2   3   3   27.55    0.62
   2   3   3   27.64    0.60
   2   3   3   27.87    0.61
  -3  -3  -3    0.00    0.09
  -3  -3  -3    0.04    0.07
   3   3   3   -0.05    0.06
   3   3   3    0.27    0.07
   3   3   3    0.05    0.07
  -4  -3  -3    1.34    0.12
  -4  -3  -3    1.54    0.15
   4   3   3    1.77    0.13
   4   3   3    1.64    0.12
   4   3   3    1.58    0.12
  -5  -3  -3   29.74    0.69
  -5  -3  -3   30.38    0.77
   5   3   3   30.38    0.71
   5   3   3   31.26    0.70
   5   3   3   31.19    0.69
  -6  -3  -3   12.99    0.44
  -6  -3  -3   12.42    0.38
   6   3   3   12.90    0.38
   6   3   3   12.81    0.39
   6   3   3   13.13    0.37
  -7  -3  -3    0.11    0.12
  -7  -3  -3   -0.08    0.15
   7   3   3   -0.01    0.12
   7   3   3    0.00    0.13
   7   3   3    0.03    0.11
  -8  -3  -3   18.55    0.54
  -8  -3  -3   19.39    0.64
   8   3   3   20.30    0.57
   8   3   3   19.57    0.53
  -9  -3  -3   22.15    0.63
  -9  -3  -3   22.52    0.72
   9   3   3   22.37    0.65
   9   3   3   23.18    0.61
 -10  -3  -3    3.09    0.31
 -10  -3  -3    2.90    0.26
  10   3   3    2.92    0.23
  10   3   3    3.18    0.28
 -11  -3  -3    0.95    0.23
 -11  -3  -3    1.21    0.27
  11   3   3    1.24    0.25
 -12  -3  -3    0.99    0.29
 -12  -3  -3    0.55    0.24
  12   3   3    0.81    0.27
 -13  -3  -3    1.61    0.35
 -13  -3  -3    1.72    0.30
  13   3   3    2.34    0.34
 -14  -3  -3    2.61    0.42
  14   3   3    2.41    0.38
 -15  -3  -3    0.17    0.35
 -17   4   3    2.52    0.37
 -17   4   3    2.22    0.46
 -16   4   3    0.10    0.36
 -16   4   3    0.13    0.27
  15  -4  -3    0.38    0.31
 -15   4   3    0.47    0.26
 -15   4   3    0.23    0.30
  14  -4  -3    2.34    0.35
 -14   4   3    2.35    0.29
 -14   4   3    2.03    0.34
  13  -4  -3   19.11    0.69
 -13   4   3   18.59    0.67
 -13   4   3   16.87    0.57
  12  -4  -3    0.23    0.23
 -12   4   3    0.31    0.25
 -12   4   3    0.36    0.19
  11  -4  -3   -0.08    0.21
 -11   4   3    0.07    0.22
 -11   4   3   -0.03    0.16
  10  -4  -3   10.44    0.45
 -10   4   3    9.51    0.36
 -10   4   3    9.43    0.45
   9  -4  -3   67.83    1.53
  -9   4   3   68.09    1.41
  -9   4   3   65.86    1.55
  -9   4   3   70.21    1.42
   8  -4  -3    1.54    0.20
  -8   4   3    1.68    0.15
  -8   4   3    1.22    0.10
  -8   4   3    1.29    0.19
   7  -4  -3    5.96    0.27
  -7   4   3    5.22    0.28
  -7   4   3    5.75    0.23
  -7   4   3    5.72    0.17
  -7   4   3    5.95    0.22
   6  -4  -3    0.07    0.11
  -6   4   3   -0.04    0.08
  -6   4   3    0.00    0.07
  -6   4   3   -0.02    0.04
  -6   4   3    0.09    0.11
   5  -4  -3  322.46    6.54
  -5   4   3  337.77    6.28
  -5   4   3  329.96    6.28
  -5   4   3  329.71    6.66
   4  -4  -3    1.12    0.12
  -4   4   3    1.11    0.09
  -4   4   3    1.12    0.12
  -4   4   3    1.09    0.09
   3  -4  -3    0.47    0.09
   3  -4  -3    0.51    0.05
  -3   4   3    0.46    0.09
  -3   4   3    0.52    0.07
  -3   4   3    0.56    0.07
   2  -4  -3    6.63    0.18
  -2   4   3    6.24    0.21
  -2   4   3    6.18    0.23
  -2   4   3    6.68    0.19
   1  -4  -3  141.99    2.83
  -1   4   3  140.79    2.71
  -1   4   3  142.97    2.83
  -1   4   3  138.42    2.88
   0  -4  -3    0.88    0.08
   0  -4  -3    1.01    0.10
   0   4   3    1.15    0.10
   0   4   3    1.12    0.09
   0   4   3    1.04    0.10
  -1  -4  -3   92.88    1.95
  -1  -4  -3   97.09    1.85
   1   4   3   96.06    1.91
   1   4   3   94.28    1.85
   1   4   3   92.01    1.95
  -2  -4  -3   17.16    0.41
  -2  -4  -3   17.11    0.45
   2   4   3   16.87    0.41
   2   4   3   17.35    0.43
   2   4   3   16.06    0.41
  -3  -4  -3  192.33    3.75
  -3  -4  -3  193.80    3.95
   3   4   3  199.09    3.76
   3   4   3  194.01    3.94
   3   4   3  192.71    3.86
  -4  -4  -3   22.45    0.60
  -4  -4  -3   22.79    0.54
   4   4   3   22.18    0.52
   4   4   3   22.63    0.54
   4   4   3   22.73    0.56
  -5  -4  -3    1.53    0.15
  -5  -4  -3    1.40    0.18
   5   4   3    1.71    0.16
   5   4   3    1.34    0.13
   5   4   3    1.69    0.15
  -6  -4  -3    4.30    0.29
  -6  -4  -3    4.73    0.24
   6   4   3    4.82    0.27
   6   4   3    4.72    0.22
   6   4   3    4.56    0.24
  -7  -4  -3    7.93    0.39
  -7  -4  -3    7.87    0.32
   7   4   3    8.07    0.34
   7   4   3    7.82    0.29
  -8  -4  -3   47.41    1.09
  -8  -4  -3   49.05    1.21
   8   4   3   47.89    1.07
   8   4   3   49.03    1.14
  -9  -4  -3    1.27    0.25
  -9  -4  -3    1.34    0.21
   9   4   3    1.40    0.18
   9   4   3    1.75    0.23
 -10  -4  -3    0.71    0.22
 -10  -4  -3    0.37    0.24
  10   4   3    0.37    0.21
 -11  -4  -3    0.59    0.29
 -11  -4  -3    0.89    0.25
  11   4   3    0.78    0.25
 -12  -4  -3    9.27    0.57
 -12  -4  -3    9.84    0.47
  12   4   3    9.99    0.53
 -13  -4  -3    0.42    0.30
  13   4   3    0.83    0.31
 -14  -4  -3    0.83    0.35
 -15  -4  -3    0.07    0.37
 -17   5   3   -0.47    0.37
 -17   5   3    0.00    0.28
  16  -5  -3    0.77    0.37
 -16   5   3    0.68    0.37
 -16   5   3    0.44    0.29
  15  -5  -3    6.19    0.49
 -15   5   3    5.82    0.49
 -15   5   3    5.62    0.40
  14  -5  -3    4.92    0.44
 -14   5   3    4.63    0.41
 -14   5   3    5.16    0.35
  13  -5  -3    2.24    0.33
 -13   5   3    2.30    0.34
 -13   5   3    1.25    0.24
  12  -5  -3    0.66    0.27
 -12   5   3    0.64    0.21
 -12   5   3    0.90    0.27
  11  -5  -3    2.77    0.29
 -11   5   3    2.15    0.29
 -11   5   3    2.43    0.23
  10  -5  -3   14.09    0.54
 -10   5   3   14.61    0.52
 -10   5   3   14.04    0.44
   9  -5  -3   50.67    1.20
  -9   5   3   50.73    1.22
  -9   5   3   49.60    1.09
   8  -5  -3   -0.01    0.15
  -8   5   3   -0.05    0.16
  -8   5   3   -0.05    0.10
   7  -5  -3   68.67    1.49
  -7   5   3   67.72    1.39
  -7   5   3   67.37    1.51
   6  -5  -3    4.08    0.24
  -6   5   3    4.33    0.20
  -6   5   3    4.05    0.24
   5  -5  -3   59.36    1.28
  -5   5   3   58.15    1.30
  -5   5   3   59.26    1.20
   4  -5  -3    1.67    0.14
  -4   5   3    1.90    0.12
  -4   5   3    1.72    0.15
   3  -5  -3  136.95    2.75
   3  -5  -3  135.77    2.71
  -3   5   3  135.76    2.81
  -3   5   3  135.40    2.63
   2  -5  -3   17.18    0.39
   2  -5  -3   16.90    0.42
  -2   5   3   16.60    0.40
  -2   5   3   17.02    0.45
  -2   5   3   16.36    0.43
   1  -5  -3    7.08    0.21
   1  -5  -3    7.05    0.22
  -1   5   3    7.24    0.23
  -1   5   3    6.87    0.27
  -1   5   3    7.10    0.23
   0  -5  -3    3.89    0.19
   0  -5  -3    3.64    0.15
   0   5   3    3.41    0.16
   0   5   3    3.38    0.20
   0   5   3    3.25    0.16
  -1  -5  -3    9.20    0.26
  -1  -5  -3    9.74    0.31
   1   5   3    8.92    0.29
   1   5   3    8.87    0.27
   1   5   3    9.05    0.27
  -2  -5  -3   82.84    1.77
  -2  -5  -3   83.49    1.67
   2   5   3   80.83    1.76
   2   5   3   85.83    1.68
   2   5   3   84.45    1.71
  -3  -5  -3   53.68    1.12
  -3  -5  -3   54.58    1.20
   3   5   3   53.49    1.12
   3   5   3   51.75    1.17
   3   5   3   52.56    1.12
  -4  -5  -3   -0.02    0.13
  -4  -5  -3    0.08    0.10
   4   5   3    0.07    0.08
   4   5   3    0.03    0.11
   4   5   3    0.23    0.11
  -5  -5  -3   21.84    0.63
  -5  -5  -3   21.74    0.55
   5   5   3   22.17    0.56
   5   5   3   21.56    0.52
   5   5   3   22.05    0.59
  -6  -5  -3    4.13    0.25
  -6  -5  -3    4.71    0.32
   6   5   3    5.04    0.29
   6   5   3    4.64    0.22
   6   5   3    4.83    0.27
  -7  -5  -3   15.07    0.47
  -7  -5  -3   14.65    0.55
   7   5   3   16.06    0.51
   7   5   3   15.31    0.43
  -8  -5  -3    2.65    0.24
  -8  -5  -3    2.24    0.27
   8   5   3    2.24    0.24
  -9  -5  -3    9.72    0.50
  -9  -5  -3    9.86    0.41
   9   5   3   10.54    0.46
 -10  -5  -3    4.09    0.33
 -10  -5  -3    3.04    0.35
  10   5   3    3.66    0.32
 -11  -5  -3    0.64    0.29
 -11  -5  -3    0.76    0.26
  11   5   3    0.92    0.27
 -12  -5  -3   -0.61    0.29
  12   5   3    0.03    0.27
 -13  -5  -3    0.04    0.34
  13   5   3    0.28    0.30
 -14  -5  -3    1.08    0.38
 -15  -5  -3    0.09    0.39
  17  -6  -3    1.45    0.40
 -17   6   3    0.38    0.31
 -17   6   3    0.58    0.40
  16  -6  -3    2.61    0.43
 -16   6   3    2.86    0.36
 -16   6   3    2.42    0.40
  15  -6  -3    1.09    0.36
 -15   6   3    0.74    0.27
 -15   6   3    1.65    0.37
  14  -6  -3    6.00    0.48
 -14   6   3    5.37    0.45
 -14   6   3    6.19    0.40
  13  -6  -3   35.47    1.01
 -13   6   3   35.03    1.01
 -13   6   3   33.90    0.89
  12  -6  -3    2.70    0.32
 -12   6   3    3.00    0.34
 -12   6   3    3.03    0.26
  11  -6  -3   11.07    0.49
 -11   6   3   10.28    0.40
 -11   6   3   10.46    0.48
  10  -6  -3    6.64    0.41
 -10   6   3    6.29    0.31
 -10   6   3    6.50    0.38
   9  -6  -3   19.50    0.60
  -9   6   3   19.78    0.61
  -9   6   3   18.45    0.51
   8  -6  -3    1.15    0.20
  -8   6   3    1.24    0.15
  -8   6   3    1.36    0.21
   7  -6  -3    6.64    0.31
  -7   6   3    5.92    0.24
  -7   6   3    6.51    0.32
   6  -6  -3   -0.23    0.12
  -6   6   3   -0.14    0.13
  -6   6   3    0.09    0.10
   5  -6  -3   13.86    0.42
  -5   6   3   14.66    0.38
  -5   6   3   14.38    0.44
   4  -6  -3    6.39    0.16
   4  -6  -3    5.78    0.25
  -4   6   3    5.79    0.29
  -4   6   3    6.41    0.23
   3  -6  -3   13.98    0.39
   3  -6  -3   13.31    0.32
  -3   6   3   14.13    0.41
  -3   6   3   13.06    0.35
   2  -6  -3   11.80    0.31
   2  -6  -3   10.96    0.34
   2  -6  -3   11.97    0.31
  -2   6   3   12.08    0.38
  -2   6   3   11.73    0.32
   1  -6  -3   10.04    0.30
   1  -6  -3   10.30    0.29
  -1   6   3   10.05    0.29
  -1   6   3    9.82    0.34
  -1   6   3   10.45    0.31
   0  -6  -3   11.48    0.34
   0  -6  -3   11.87    0.32
   0   6   3   11.52    0.37
   0   6   3   12.00    0.34
   0   6   3   12.11    0.33
  -1  -6  -3    0.17    0.11
  -1  -6  -3   -0.02    0.08
   1   6   3    0.02    0.09
   1   6   3    0.10    0.09
   1   6   3    0.20    0.11
  -2  -6  -3    0.71    0.12
  -2  -6  -3    0.88    0.15
   2   6   3    0.76    0.12
   2   6   3    0.74    0.11
   2   6   3    0.78    0.14
  -3  -6  -3    1.99    0.19
   3   6   3    2.08    0.18
   3   6   3    2.26    0.15
   3   6   3    2.19    0.17
  -4  -6  -3   24.57    0.62
  -4  -6  -3   26.62    0.70
   4   6   3   25.55    0.60
   4   6   3   26.09    0.63
   4   6   3   25.60    0.67
  -5  -6  -3    1.66    0.21
  -5  -6  -3    1.69    0.19
   5   6   3    1.40    0.17
   5   6   3    1.80    0.19
   5   6   3    1.65    0.14
  -6  -6  -3    2.69    0.27
  -6  -6  -3    2.91    0.22
   6   6   3    2.84    0.24
   6   6   3    3.07    0.20
  -7  -6  -3    0.85    0.19
  -7  -6  -3    0.95    0.23
   7   6   3    1.14    0.21
  -8  -6  -3   11.52    0.52
  -8  -6  -3   11.53    0.45
   8   6   3   11.28    0.48
  -9  -6  -3    0.79    0.26
  -9  -6  -3    0.85    0.24
   9   6   3    0.59    0.23
 -10  -6  -3    0.04    0.23
 -10  -6  -3   -0.04    0.26
  10   6   3    0.05    0.24
 -11  -6  -3    0.17    0.28
  11   6   3    0.14    0.27
 -12  -6  -3   13.74    0.66
  12   6   3   13.37    0.62
 -13  -6  -3    1.76    0.41
 -14  -6  -3    0.46    0.37
  17  -7  -3    0.81    0.40
 -17   7   3    0.90    0.37
 -17   7   3    0.15    0.31
  16  -7  -3    1.40    0.41
 -16   7   3    1.12    0.30
 -16   7   3    0.28    0.37
  15  -7  -3    3.30    0.42
 -15   7   3    3.18    0.35
 -15   7   3    3.06    0.42
  14  -7  -3    0.12    0.32
 -14   7   3    0.42    0.25
 -14   7   3    0.21    0.29
  13  -7  -3   11.47    0.57
 -13   7   3   12.06    0.49
 -13   7   3   12.56    0.60
 -12   7   3    1.37    0.23
 -12   7   3    1.14    0.28
  11  -7  -3   34.92    0.95
 -11   7   3   31.69    0.81
 -11   7   3   32.49    0.92
  10  -7  -3   -0.13    0.22
 -10   7   3    0.04    0.21
 -10   7   3    0.15    0.17
   9  -7  -3   60.83    1.44
  -9   7   3   62.78    1.33
  -9   7   3   62.17    1.47
   8  -7  -3    0.72    0.19
  -8   7   3    0.72    0.15
  -8   7   3    0.88    0.19
   7  -7  -3   60.42    1.38
  -7   7   3   60.82    1.41
  -7   7   3   61.87    1.29
   6  -7  -3    6.17    0.30
  -6   7   3    6.47    0.32
  -6   7   3    6.24    0.25
   5  -7  -3   25.90    0.65
  -5   7   3   26.00    0.69
  -5   7   3   24.41    0.60
   4  -7  -3    8.54    0.32
   4  -7  -3    9.18    0.23
  -4   7   3    9.14    0.31
  -4   7   3    8.69    0.35
   3  -7  -3   64.17    1.32
   3  -7  -3   66.42    1.40
   3  -7  -3   65.27    1.34
  -3   7   3   64.16    1.34
  -3   7   3   64.39    1.44
   2  -7  -3   28.57    0.63
   2  -7  -3   28.20    0.67
   2  -7  -3   28.97    0.65
  -2   7   3   27.96    0.65
  -2   7   3   27.42    0.72
   1  -7  -3   52.66    1.10
   1  -7  -3   53.11    1.14
   1  -7  -3   53.70    1.15
  -1   7   3   52.34    1.20
  -1   7   3   51.91    1.15
  -1   7   3   54.09    1.12
   0  -7  -3   11.29    0.36
   0  -7  -3   10.74    0.33
   0   7   3   10.94    0.33
   0   7   3   10.69    0.38
   0   7   3   10.73    0.33
  -1  -7  -3   19.04    0.48
  -1  -7  -3   18.02    0.51
   1   7   3   19.15    0.48
   1   7   3   18.13    0.49
   1   7   3   19.06    0.55
  -2  -7  -3   12.48    0.43
  -2  -7  -3   13.73    0.39
   2   7   3   13.64    0.45
   2   7   3   13.85    0.37
   2   7   3   13.72    0.40
  -3  -7  -3   44.33    1.05
  -3  -7  -3   43.97    0.96
   3   7   3   43.59    0.98
   3   7   3   43.68    0.95
   3   7   3   41.97    1.03
  -4  -7  -3    3.61    0.27
  -4  -7  -3    3.86    0.24
   4   7   3    3.89    0.24
   4   7   3    4.10    0.27
   4   7   3    4.01    0.22
  -5  -7  -3    3.17    0.23
  -5  -7  -3    2.68    0.26
   5   7   3    3.02    0.25
   5   7   3    2.49    0.22
   5   7   3    3.27    0.19
  -6  -7  -3   20.96    0.60
  -6  -7  -3   22.27    0.69
   6   7   3   22.23    0.66
  -7  -7  -3   10.61    0.51
  -7  -7  -3    9.42    0.40
   7   7   3   10.18    0.47
  -8  -7  -3   -0.13    0.20
  -8  -7  -3   -0.41    0.24
   8   7   3    0.02    0.21
  -9  -7  -3    0.29    0.23
  -9  -7  -3    0.25    0.26
   9   7   3    0.44    0.25
 -10  -7  -3    5.04    0.44
  10   7   3    4.66    0.38
 -11  -7  -3    0.51    0.32
  11   7   3    0.44    0.29
 -12  -7  -3    0.89    0.36
  12   7   3    1.05    0.33
 -13  -7  -3    0.34    0.36
 -14  -7  -3    2.65    0.45
  17  -8  -3    0.72    0.43
 -17   8   3    1.14    0.43
 -17   8   3    1.26    0.35
  16  -8  -3    3.12    0.45
 -16   8   3    3.24    0.38
 -16   8   3    2.33    0.43
  15  -8  -3    0.22    0.36
 -15   8   3   -0.03    0.28
 -15   8   3   -0.32    0.33
  14  -8  -3   -0.09    0.30
 -14   8   3    0.21    0.25
 -14   8   3    0.11    0.32
  13  -8  -3   13.89    0.62
 -13   8   3   13.37    0.59
 -13   8   3   12.29    0.51
  12  -8  -3    2.11    0.34
 -12   8   3    2.26    0.32
 -12   8   3    1.47    0.25
  11  -8  -3    0.13    0.24
 -11   8   3    0.51    0.24
 -11   8   3    0.31    0.18
  10  -8  -3    2.83    0.30
 -10   8   3    3.38    0.32
 -10   8   3    2.94    0.25
   9  -8  -3    8.26    0.44
  -9   8   3    7.82    0.35
  -9   8   3    7.31    0.43
   8  -8  -3    3.08    0.27
  -8   8   3    2.58    0.25
  -8   8   3    2.18    0.20
   7  -8  -3   22.91    0.65
  -7   8   3   21.41    0.66
  -7   8   3   21.62    0.57
   6  -8  -3    6.68    0.33
  -6   8   3    7.07    0.35
  -6   8   3    6.82    0.28
   5  -8  -3   15.85    0.49
  -5   8   3   14.95    0.51
  -5   8   3   14.80    0.43
   4  -8  -3   31.73    0.77
   4  -8  -3   31.32    0.68
  -4   8   3   31.09    0.81
  -4   8   3   32.30    0.74
   3  -8  -3   16.42    0.43
   3  -8  -3   16.42    0.47
   3  -8  -3   16.26    0.41
  -3   8   3   15.85    0.51
  -3   8   3   16.01    0.45
   2  -8  -3    1.62    0.14
   2  -8  -3    1.70    0.15
   2  -8  -3    1.47    0.16
  -2   8   3    1.66    0.19
  -2   8   3    1.88    0.16
   1  -8  -3    4.17    0.23
   1  -8  -3    4.06    0.23
   1  -8  -3    4.36    0.23
  -1   8   3    4.12    0.28
  -1   8   3    4.46    0.23
   0  -8  -3   23.95    0.58
   0  -8  -3   23.91    0.62
   0   8   3   23.97    0.59
   0   8   3   23.36    0.59
   0   8   3   22.96    0.66
  -1  -8  -3    7.00    0.29
  -1  -8  -3    6.82    0.33
   1   8   3    7.23    0.27
   1   8   3    6.95    0.30
   1   8   3    6.70    0.36
  -2  -8  -3   10.57    0.40
  -2  -8  -3   10.42    0.36
   2   8   3   10.90    0.41
   2   8   3   10.69    0.34
   2   8   3   11.13    0.37
  -3  -8  -3   14.41    0.43
  -3  -8  -3   13.45    0.48
   3   8   3   14.21    0.48
   3   8   3   14.07    0.40
   3   8   3   13.69    0.43
  -4  -8  -3   59.31    1.38
  -4  -8  -3   58.54    1.28
   4   8   3   58.26    1.25
   4   8   3   58.44    1.29
   4   8   3   58.17    1.37
  -5  -8  -3    4.99    0.30
  -5  -8  -3    4.35    0.34
   5   8   3    4.99    0.33
  -6  -8  -3   15.07    0.60
  -6  -8  -3   14.30    0.48
   6   8   3   14.29    0.55
  -7  -8  -3    1.06    0.26
  -7  -8  -3    0.80    0.23
   7   8   3    0.72    0.24
  -8  -8  -3    8.16    0.51
   8   8   3    8.15    0.48
  -9  -8  -3    0.47    0.31
   9   8   3    0.34    0.27
 -10  -8  -3    7.41    0.51
  10   8   3    7.27    0.47
 -11  -8  -3    0.10    0.32
  11   8   3    0.20    0.31
 -12  -8  -3    0.43    0.35
 -13  -8  -3    0.34    0.40
  16  -9  -3    1.57    0.44
 -16   9   3    1.63    0.39
 -16   9   3    1.65    0.35
  15  -9  -3    3.01    0.47
 -15   9   3    3.48    0.37
 -15   9   3    3.26    0.42
  14  -9  -3    0.19    0.34
 -14   9   3    0.65    0.26
 -14   9   3    0.22    0.32
  13  -9  -3   13.36    0.62
 -13   9   3   13.18    0.53
 -13   9   3   13.67    0.61
  12  -9  -3   -0.12    0.26
 -12   9   3    0.02    0.22
 -12   9   3    0.50    0.28
  11  -9  -3    7.45    0.46
 -11   9   3    7.22    0.36
 -11   9   3    8.05    0.46
  10  -9  -3    0.23    0.23
 -10   9   3    0.53    0.19
 -10   9   3    0.09    0.24
   9  -9  -3    6.98    0.40
  -9   9   3    6.17    0.33
  -9   9   3    6.38    0.42
   8  -9  -3    2.09    0.26
  -8   9   3    2.09    0.21
  -8   9   3    2.81    0.27
   7  -9  -3    1.56    0.22
  -7   9   3    1.95    0.20
  -7   9   3    1.80    0.23
   6  -9  -3   -0.06    0.16
  -6   9   3    0.15    0.15
  -6   9   3   -0.12    0.17
   5  -9  -3   16.92    0.51
  -5   9   3   16.31    0.48
  -5   9   3   16.70    0.55
   4  -9  -3   11.50    0.31
   4  -9  -3   11.40    0.40
  -4   9   3   12.19    0.46
  -4   9   3   11.07    0.38
   3  -9  -3    0.12    0.14
   3  -9  -3    0.21    0.11
  -3   9   3    0.17    0.16
  -3   9   3    0.18    0.14
   2  -9  -3    6.72    0.27
   2  -9  -3    6.09    0.30
  -2   9   3    6.15    0.35
  -2   9   3    6.54    0.29
   1  -9  -3   13.54    0.40
   1  -9  -3   12.59    0.41
   1  -9  -3   13.09    0.40
  -1   9   3   13.72    0.42
  -1   9   3   13.07    0.50
   0  -9  -3    5.79    0.30
   0  -9  -3    5.93    0.27
   0  -9  -3    6.13    0.27
   0   9   3    5.63    0.28
   0   9   3    6.14    0.35
  -1  -9  -3   -0.02    0.13
  -1  -9  -3   -0.04    0.16
   1   9   3   -0.01    0.13
   1   9   3    0.16    0.16
   1   9   3    0.23    0.14
  -2  -9  -3    1.33    0.18
  -2  -9  -3    1.35    0.20
   2   9   3    1.02    0.15
   2   9   3    1.25    0.18
   2   9   3    1.36    0.21
  -3  -9  -3   -0.22    0.17
  -3  -9  -3   -0.18    0.14
   3   9   3    0.00    0.13
   3   9   3    0.08    0.19
   3   9   3    0.18    0.16
  -4  -9  -3    0.13    0.16
  -4  -9  -3    0.02    0.19
   4   9   3   -0.07    0.20
  -5  -9  -3    0.11    0.23
   5   9   3    0.29    0.21
  -6  -9  -3    0.10    0.23
   6   9   3    0.30    0.23
  -7  -9  -3    1.20    0.28
   7   9   3    0.61    0.26
  -8  -9  -3    0.80    0.31
   8   9   3    0.33    0.27
  -9  -9  -3    1.95    0.36
   9   9   3    1.88    0.34
 -10  -9  -3    1.20    0.35
  10   9   3    1.28    0.35
 -11  -9  -3   -0.30    0.32
  11   9   3    0.45    0.34
 -12  -9  -3    0.56    0.40
  16 -10  -3    0.65    0.39
 -16  10   3   -0.39    0.30
 -16  10   3    0.13    0.35
  15 -10  -3    5.10    0.51
 -15  10   3    5.04    0.48
 -15  10   3    4.13    0.38
  14 -10  -3    0.73    0.36
 -14  10   3    1.05    0.36
 -14  10   3    0.68    0.27
  13 -10  -3   14.12    0.65
 -13  10   3   13.31    0.62
 -13  10   3   14.21    0.56
  12 -10  -3    0.52    0.31
 -12  10   3    0.50    0.24
 -12  10   3    0.58    0.29
  11 -10  -3    2.48    0.36
 -11  10   3    2.88    0.29
 -11  10   3    2.73    0.33
  10 -10  -3   -0.12    0.23
 -10  10   3   -0.14    0.19
 -10  10   3   -0.02    0.22
   9 -10  -3   12.52    0.52
  -9  10   3   11.39    0.44
  -9  10   3   11.02    0.50
   8 -10  -3    9.67    0.45
  -8  10   3    8.41    0.45
  -8  10   3    9.56    0.39
   7 -10  -3   45.82    1.15
  -7  10   3   47.20    1.08
  -7  10   3   48.17    1.19
   6 -10  -3    0.26    0.19
  -6  10   3   -0.08    0.19
  -6  10   3    0.07    0.15
   5 -10  -3   19.31    0.60
  -5  10   3   20.02    0.66
  -5  10   3   20.26    0.56
   4 -10  -3   15.60    0.51
  -4  10   3   16.37    0.56
  -4  10   3   15.02    0.47
   3 -10  -3   10.95    0.34
   3 -10  -3    9.98    0.38
  -3  10   3   10.40    0.38
  -3  10   3   10.56    0.46
   2 -10  -3   18.49    0.53
   2 -10  -3   18.36    0.52
  -2  10   3   19.62    0.55
  -2  10   3   19.41    0.62
   1 -10  -3    4.27    0.30
   1 -10  -3    4.46    0.27
  -1  10   3    4.77    0.28
  -1  10   3    5.13    0.34
   0 -10  -3    4.97    0.28
   0 -10  -3    5.81    0.32
   0  10   3    6.19    0.31
   0  10   3    5.55    0.35
  -1 -10  -3    0.48    0.14
  -1 -10  -3    0.19    0.18
   1  10   3    0.31    0.21
   1  10   3    0.40    0.17
  -2 -10  -3   25.24    0.71
  -2 -10  -3   25.40    0.63
   2  10   3   24.80    0.74
   2  10   3   24.26    0.67
  -3 -10  -3    0.38    0.20
   3  10   3    0.30    0.21
  -4 -10  -3   10.52    0.50
   4  10   3   10.12    0.48
  -5 -10  -3    0.30    0.24
   5  10   3    0.21    0.23
  -6 -10  -3    1.95    0.33
   6  10   3    2.07    0.29
  -7 -10  -3    0.39    0.28
   7  10   3    1.17    0.30
  -8 -10  -3    0.18    0.31
   8  10   3   -0.22    0.29
  -9 -10  -3    0.69    0.33
   9  10   3    0.48    0.32
 -10 -10  -3    0.73    0.38
  10  10   3    1.49    0.37
 -11 -10  -3    0.21    0.39
  16 -11  -3    1.53    0.44
 -16  11   3    1.34    0.42
 -16  11   3    1.49    0.36
  15 -11  -3    0.11    0.37
 -15  11   3    0.64    0.31
 -15  11   3    0.42    0.37
  14 -11  -3    0.66    0.39
 -14  11   3    0.73    0.34
 -14  11   3    1.20    0.31
  13 -11  -3    7.08    0.52
 -13  11   3    6.35    0.49
 -13  11   3    6.59    0.41
  12 -11  -3    0.00    0.28
 -12  11   3    0.81    0.32
 -12  11   3   -0.13    0.24
  11 -11  -3    2.32    0.35
 -11  11   3    3.08    0.37
 -11  11   3    2.65    0.29
  10 -11  -3    0.07    0.25
 -10  11   3    0.43    0.25
 -10  11   3    0.09    0.21
   9 -11  -3    0.50    0.25
  -9  11   3    0.75    0.26
  -9  11   3    0.61    0.21
   8 -11  -3    3.37    0.32
  -8  11   3    3.62    0.28
  -8  11   3    3.29    0.33
   7 -11  -3    0.91    0.25
  -7  11   3    1.15    0.21
  -7  11   3    1.24    0.26
   6 -11  -3    0.25    0.20
  -6  11   3    0.40    0.22
  -6  11   3    0.37    0.18
   5 -11  -3   32.95    0.88
  -5  11   3   33.24    0.83
  -5  11   3   34.28    0.95
   4 -11  -3    7.59    0.36
  -4  11   3    7.94    0.47
  -4  11   3    6.94    0.34
   3 -11  -3    0.24    0.18
  -3  11   3   -0.06    0.22
  -3  11   3   -0.12    0.16
   2 -11  -3   13.81    0.44
   2 -11  -3   12.85    0.45
  -2  11   3   13.37    0.45
  -2  11   3   12.41    0.56
   1 -11  -3   20.98    0.59
   1 -11  -3   20.38    0.60
  -1  11   3   20.45    0.60
  -1  11   3   22.26    0.70
   0 -11  -3    1.37    0.19
   0 -11  -3    1.33    0.21
   0  11   3    0.98    0.24
   0  11   3    1.48    0.21
  -1 -11  -3    4.25    0.27
  -1 -11  -3    3.38    0.29
   1  11   3    4.17    0.30
   1  11   3    4.65    0.36
  -2 -11  -3    5.72    0.37
   2  11   3    6.79    0.42
  -3 -11  -3    0.22    0.23
   3  11   3   -0.01    0.24
  -4 -11  -3   -0.22    0.24
   4  11   3    0.31    0.24
  -5 -11  -3    2.76    0.34
   5  11   3    3.55    0.37
  -6 -11  -3    3.43    0.38
   6  11   3    3.67    0.38
  -7 -11  -3    0.03    0.31
   7  11   3    0.55    0.29
  -8 -11  -3    0.82    0.33
   8  11   3    0.97    0.32
  -9 -11  -3    0.41    0.36
   9  11   3    0.09    0.33
 -10 -11  -3   -0.18    0.35
  10  11   3    0.36    0.38
 -11 -11  -3   -0.49    0.38
  15 -12  -3    1.08    0.43
 -15  12   3    1.42    0.35
 -15  12   3    1.10    0.41
  14 -12  -3   -0.47    0.36
 -14  12   3    0.16    0.32
 -14  12   3   -0.32    0.28
  13 -12  -3    0.60    0.34
 -13  12   3    0.04    0.33
 -13  12   3    0.09    0.28
  12 -12  -3    1.02    0.36
 -12  12   3    1.14    0.30
 -12  12   3    1.05    0.34
  11 -12  -3    9.01    0.57
 -11  12   3    8.25    0.43
 -11  12   3    8.10    0.54
  10 -12  -3    4.79    0.41
 -10  12   3    4.00    0.40
 -10  12   3    4.03    0.32
   9 -12  -3    0.35    0.27
  -9  12   3    0.25    0.23
  -9  12   3    0.30    0.26
   8 -12  -3    2.69    0.32
  -8  12   3    2.51    0.27
  -8  12   3    2.23    0.32
   7 -12  -3    6.75    0.40
  -7  12   3    6.00    0.42
  -7  12   3    5.80    0.35
   6 -12  -3   14.35    0.54
  -6  12   3   15.38    0.51
  -6  12   3   15.13    0.60
   5 -12  -3    3.08    0.29
  -5  12   3    3.05    0.27
  -5  12   3    3.34    0.33
   4 -12  -3    1.03    0.23
  -4  12   3    1.28    0.27
  -4  12   3    1.18    0.22
   3 -12  -3    0.07    0.19
  -3  12   3    0.29    0.20
  -3  12   3    0.04    0.24
   2 -12  -3    0.98    0.21
   2 -12  -3    0.81    0.19
  -2  12   3    0.70    0.26
  -2  12   3    0.88    0.21
   1 -12  -3    2.22    0.24
   1 -12  -3    2.18    0.23
  -1  12   3    1.55    0.23
  -1  12   3    2.13    0.29
   0 -12  -3    0.09    0.18
   0 -12  -3    0.33    0.19
   0  12   3    0.34    0.24
   0  12   3    0.68    0.21
  -1 -12  -3    0.88    0.24
   1  12   3    1.31    0.28
  -2 -12  -3    2.36    0.30
   2  12   3    2.80    0.33
  -3 -12  -3   -0.10    0.25
   3  12   3   -0.17    0.27
  -4 -12  -3    0.37    0.26
   4  12   3    0.72    0.31
  -5 -12  -3    1.62    0.35
   5  12   3    1.70    0.34
  -6 -12  -3    1.41    0.33
   6  12   3    2.00    0.37
  -7 -12  -3   -0.34    0.33
   7  12   3    0.12    0.33
  -8 -12  -3   -0.01    0.32
   8  12   3   -0.30    0.30
  -9 -12  -3    0.29    0.35
   9  12   3    0.51    0.38
 -10 -12  -3   -0.33    0.39
  14 -13  -3    0.03    0.39
 -14  13   3   -0.23    0.29
 -14  13   3   -0.08    0.36
  13 -13  -3    6.62    0.56
 -13  13   3    6.04    0.50
 -13  13   3    5.57    0.42
  12 -13  -3   -0.03    0.34
 -12  13   3   -0.57    0.31
 -12  13   3    0.19    0.28
  11 -13  -3    3.56    0.44
 -11  13   3    3.61    0.42
 -11  13   3    3.45    0.35
  10 -13  -3    4.41    0.44
 -10  13   3    5.24    0.45
 -10  13   3    5.57    0.40
   9 -13  -3    1.90    0.33
  -9  13   3    2.10    0.34
  -9  13   3    2.51    0.31
   8 -13  -3    0.29    0.27
  -8  13   3    0.38    0.28
  -8  13   3   -0.39    0.21
   7 -13  -3    0.21    0.26
  -7  13   3   -0.04    0.23
  -7  13   3    0.17    0.28
   6 -13  -3    8.05    0.43
  -6  13   3    6.69    0.40
  -6  13   3    7.27    0.48
   5 -13  -3    3.04    0.31
  -5  13   3    3.13    0.37
   4 -13  -3    6.58    0.41
  -4  13   3    7.66    0.48
  -4  13   3    7.31    0.40
   3 -13  -3   -0.17    0.21
  -3  13   3    0.52    0.29
  -3  13   3   -0.03    0.20
   2 -13  -3    8.50    0.41
  -2  13   3    8.73    0.50
  -2  13   3    7.63    0.41
   1 -13  -3    7.26    0.39
   1 -13  -3    6.99    0.37
  -1  13   3    7.88    0.53
   0 -13  -3   11.09    0.48
   0  13   3   10.18    0.55
  -1 -13  -3    0.11    0.23
   1  13   3   -0.30    0.27
  -2 -13  -3    3.19    0.34
   2  13   3    3.31    0.39
  -3 -13  -3    0.51    0.29
   3  13   3    0.78    0.33
  -4 -13  -3    7.47    0.49
   4  13   3    8.59    0.59
  -5 -13  -3    0.57    0.31
   5  13   3    0.80    0.35
  -6 -13  -3    3.84    0.44
   6  13   3    4.08    0.46
  -7 -13  -3    0.97    0.38
   7  13   3    0.96    0.40
  -8 -13  -3    0.29    0.36
   8  13   3   -0.05    0.38
  -9 -13  -3    0.60    0.39
   9  13   3    0.63    0.41
  14 -14  -3    0.42    0.40
 -14  14   3    0.52    0.33
 -14  14   3    0.42    0.39
  13 -14  -3    0.19    0.39
 -13  14   3    0.47    0.30
 -13  14   3    0.86    0.36
  12 -14  -3    0.48    0.37
 -12  14   3    0.37    0.30
 -12  14   3    0.06    0.35
  11 -14  -3    1.09    0.36
 -11  14   3    1.62    0.31
 -11  14   3    1.88    0.37
  10 -14  -3    1.40    0.38
 -10  14   3    1.46    0.34
 -10  14   3    0.72    0.28
   9 -14  -3    0.98    0.32
  -9  14   3    0.51    0.34
  -9  14   3    1.38    0.31
   8 -14  -3    0.97    0.30
  -8  14   3    1.63    0.30
  -8  14   3    1.44    0.35
   7 -14  -3   -0.05    0.28
  -7  14   3    0.46    0.32
  -7  14   3    0.78    0.27
   6 -14  -3    1.57    0.31
  -6  14   3    0.89    0.26
  -6  14   3    1.44    0.35
   5 -14  -3    0.26    0.25
  -5  14   3    0.33    0.24
  -5  14   3    0.57    0.31
   4 -14  -3    1.44    0.28
  -4  14   3    1.34    0.34
  -4  14   3    1.56    0.27
   3 -14  -3    0.53    0.24
  -3  14   3    0.12    0.31
   2 -14  -3    0.70    0.24
  -2  14   3    0.54    0.30
  -1  14   3    0.05    0.28
   0 -14  -3    5.35    0.37
   0  14   3    4.77    0.44
  -1 -14  -3    1.31    0.29
   1  14   3    0.78    0.35
  -2 -14  -3   -0.01    0.25
   2  14   3    0.00    0.32
  -3 -14  -3   -0.15    0.29
   3  14   3    0.08    0.34
  -4 -14  -3    4.64    0.44
   4  14   3    5.59    0.51
  -5 -14  -3   -0.18    0.33
   5  14   3    0.46    0.37
  -6 -14  -3    3.86    0.44
   6  14   3    3.57    0.48
  -7 -14  -3    0.26    0.36
   7  14   3    0.65    0.41
  13 -15  -3    7.26    0.62
 -13  15   3    6.88    0.51
 -13  15   3    6.53    0.56
  12 -15  -3   -0.03    0.35
 -12  15   3   -0.46    0.35
 -12  15   3    0.12    0.31
  11 -15  -3    0.42    0.35
 -11  15   3    0.38    0.32
 -11  15   3   -0.38    0.31
  10 -15  -3    1.51    0.40
 -10  15   3    1.82    0.34
 -10  15   3    1.76    0.40
   9 -15  -3    4.38    0.46
  -9  15   3    4.36    0.45
  -9  15   3    4.06    0.38
   8 -15  -3    4.73    0.44
  -8  15   3    4.59    0.40
  -8  15   3    5.00    0.49
   7 -15  -3    5.68    0.44
  -7  15   3    6.32    0.50
  -7  15   3    5.56    0.41
   6 -15  -3    0.05    0.29
  -6  15   3   -0.10    0.33
   5 -15  -3    7.72    0.45
  -5  15   3    7.19    0.52
   4 -15  -3    6.08    0.40
  -4  15   3    6.63    0.52
  -3  15   3    5.84    0.48
  -2  15   3    0.26    0.31
  -1  15   3    0.09    0.34
   0  15   3    6.62    0.53
   1  15   3    1.52    0.39
  -2 -15  -3    0.23    0.30
   2  15   3    0.08    0.33
  -3 -15  -3    0.46    0.33
   3  15   3   -0.62    0.31
  -4 -15  -3    2.63    0.41
   4  15   3    2.44    0.46
  -5 -15  -3    0.24    0.33
   5  15   3    0.06    0.39
  -6 -15  -3    0.08    0.38
   6  15   3   -0.35    0.40
  11 -16  -3    1.32    0.40
 -11  16   3    1.91    0.41
  10 -16  -3    2.29    0.41
 -10  16   3    1.63    0.43
   9 -16  -3    2.01    0.42
  -9  16   3    1.86    0.42
   8 -16  -3    0.25    0.32
  -8  16   3    0.23    0.34
   7 -16  -3    0.84    0.35
  -7  16   3    1.12    0.36
   6 -16  -3    2.03    0.37
  -6  16   3    1.67    0.41
   5 -16  -3    0.35    0.31
  -5  16   3    0.09    0.35
  -4  16   3    1.63    0.40
  -3  16   3    0.29    0.34
  -2  16   3    3.82    0.48
  -1  16   3    1.32    0.41
   0  16   3   -0.23    0.35
   1  16   3   -0.22    0.36
   2  16   3    8.16    0.61
  -3 -16  -3    0.31    0.34
   3  16   3    0.47    0.40
  -4 -16  -3   -0.24    0.35
   4  16   3    0.18    0.41
   9 -17  -3    2.56    0.45
  -9  17   3    3.49    0.47
   8 -17  -3   -0.57    0.35
  -8  17   3    0.19    0.36
   7 -17  -3    0.18    0.35
  -7  17   3    0.82    0.40
   6 -17  -3   -0.29    0.31
  -6  17   3   -0.15    0.38
  -5  17   3   -0.05    0.34
  -4  17   3   -0.15    0.38
  -3  17   3    0.10    0.35
  -2  17   3    0.26    0.39
  -1  17   3    1.05    0.43
   0  17   3    0.82    0.42
   1  17   3   -0.34    0.39
   2  17   3    3.80    0.54
  -6  18   3    1.96    0.47
  -5  18   3    0.92    0.43
  -4  18   3    0.44    0.42
  -3  18   3    0.35    0.43
  -2  18   3    0.66    0.40
  -1  18   3    0.43    0.43
  -1  18  -4    0.50    0.43
  -2  18  -4    0.89    0.46
  -3  18  -4    4.00    0.54
  -4  18  -4    0.33    0.40
  -5  18  -4    0.71    0.44
  -6  18  -4   -0.11    0.40
   2  17  -4   -0.20    0.39
   1  17  -4    0.65    0.43
   0  17  -4    0.24    0.38
  -1  17  -4    0.86    0.43
  -2  17  -4    0.77    0.43
  -3  17  -4   -0.16    0.36
  -4  17  -4    1.04    0.42
  -5  17  -4    0.21    0.39
  -6  17  -4    2.44    0.46
  -7  17  -4    0.34    0.36
  -8  17  -4   -0.03    0.40
  -9  17  -4   -0.27    0.39
   9 -17   4   -0.29    0.34
   5  16  -4    2.14    0.46
  -5 -16   4    1.75    0.43
   4  16  -4    0.79    0.44
  -4 -16   4    0.27    0.37
   3  16  -4    0.13    0.41
  -3 -16   4    0.17    0.31
   2  16  -4   -0.61    0.34
  -2 -16   4    0.34    0.33
   1  16  -4    0.05    0.35
   0  16  -4    1.60    0.40
  -1  16  -4    7.79    0.58
  -2  16  -4    1.10    0.40
  -3  16  -4    3.09    0.43
  -4  16  -4    0.38    0.38
  -5  16  -4    1.39    0.40
  -6  16  -4    1.26    0.40
  -7  16  -4    0.18    0.36
   7 -16   4    0.20    0.33
  -8  16  -4    2.25    0.43
   8 -16   4    2.13    0.38
   9 -16   4    1.63    0.41
 -10  16  -4    0.69    0.40
  10 -16   4    1.34    0.41
 -11  16  -4    0.30    0.40
  11 -16   4    0.37    0.38
   6  15  -4    1.65    0.44
  -6 -15   4    1.32    0.42
   5  15  -4   -0.34    0.36
  -5 -15   4   -0.29    0.34
   4  15  -4    1.59    0.41
  -4 -15   4    1.37    0.37
   3  15  -4    0.14    0.38
  -3 -15   4    0.95    0.32
   2  15  -4    0.32    0.37
  -2 -15   4    0.22    0.31
   1  15  -4    0.49    0.34
  -1 -15   4   -0.25    0.27
   0  15  -4    1.08    0.35
   0 -15   4    1.25    0.31
  -1  15  -4   -0.01    0.31
  -2  15  -4    8.37    0.56
  -3  15  -4    0.20    0.34
  -4  15  -4    1.62    0.38
  -5  15  -4    1.85    0.38
  -6  15  -4    4.13    0.46
   6 -15   4    4.49    0.42
  -7  15  -4   -0.25    0.30
   7 -15   4   -0.06    0.31
  -8  15  -4    0.04    0.35
   8 -15   4   -0.05    0.30
  -9  15  -4    0.11    0.32
   9 -15   4    0.00    0.31
 -10  15  -4    4.68    0.48
  10 -15   4    4.95    0.48
 -11  15  -4    1.14    0.40
  11 -15   4    1.88    0.41
 -12  15  -4    0.00    0.36
  12 -15   4    0.30    0.41
   8  14  -4    0.57    0.44
  -8 -14   4    0.84    0.38
   7  14  -4   -0.23    0.37
  -7 -14   4    0.42    0.34
   6  14  -4    0.06    0.35
  -6 -14   4    0.12    0.33
   5  14  -4    2.21    0.43
  -5 -14   4    1.72    0.36
   4  14  -4    0.57    0.37
  -4 -14   4    0.14    0.29
   3  14  -4    1.70    0.38
  -3 -14   4    1.09    0.33
   2  14  -4    4.46    0.47
  -2 -14   4    4.30    0.38
   1  14  -4   -0.05    0.29
  -1 -14   4    0.02    0.26
   0  14  -4    3.29    0.40
   0 -14   4    3.64    0.34
  -1  14  -4    5.31    0.45
   1 -14   4    5.16    0.37
  -2  14  -4   -0.09    0.31
  -3  14  -4    1.48    0.35
  -4  14  -4   10.90    0.61
   4 -14   4   10.28    0.53
  -5  14  -4    0.47    0.29
   5 -14   4    1.02    0.28
  -6  14  -4    0.05    0.29
   6 -14   4   -0.10    0.26
  -7  14  -4    1.60    0.34
   7 -14   4    1.68    0.35
  -8  14  -4   11.61    0.59
   8 -14   4   10.99    0.61
  -9  14  -4    0.20    0.30
   9 -14   4   -0.25    0.32
 -10  14  -4    3.50    0.43
  10 -14   4    2.65    0.41
 -11  14  -4    0.00    0.34
  11 -14   4   -0.70    0.32
 -12  14  -4    7.70    0.56
  12 -14   4    9.13    0.62
 -13  14  -4    0.24    0.37
  13 -14   4    0.21    0.38
   9  13  -4    0.26    0.38
  -9 -13   4    0.15    0.36
   8  13  -4   -0.09    0.35
  -8 -13   4    0.05    0.35
   7  13  -4    2.32    0.44
  -7 -13   4    1.92    0.39
   6  13  -4    0.04    0.36
  -6 -13   4    0.60    0.33
   5  13  -4   -0.07    0.31
  -5 -13   4    0.76    0.33
   4  13  -4    2.36    0.40
  -4 -13   4    2.20    0.35
   3  13  -4    0.92    0.34
  -3 -13   4    0.28    0.25
   2  13  -4   -0.09    0.30
  -2 -13   4   -0.09    0.25
   1  13  -4   -0.12    0.29
  -1 -13   4    0.53    0.25
   0  13  -4    4.89    0.42
   0 -13   4    4.90    0.35
  -1  13  -4    1.46    0.33
   1 -13   4    1.38    0.24
  -2  13  -4    0.77    0.30
   2 -13   4    1.01    0.23
  -3  13  -4   10.37    0.54
   3 -13   4   11.00    0.47
  -4  13  -4   11.23    0.59
   4 -13   4   10.91    0.50
  -5  13  -4    7.96    0.52
   5 -13   4    7.61    0.46
  -6  13  -4    7.88    0.49
   6 -13   4    7.85    0.49
  -7  13  -4    0.47    0.30
   7 -13   4    0.32    0.26
  -8  13  -4    2.78    0.35
   8 -13   4    2.13    0.34
  -9  13  -4    0.55    0.32
   9 -13   4    0.50    0.32
 -10  13  -4    8.85    0.53
  10 -13   4    9.75    0.60
 -11  13  -4    0.77    0.32
  11 -13   4    1.44    0.39
 -12  13  -4    0.67    0.33
  12 -13   4    0.08    0.38
 -13  13  -4   -0.10    0.34
  13 -13   4    0.52    0.38
 -14  13  -4    4.03    0.48
  14 -13   4    4.36    0.55
  10  12  -4    2.85    0.48
 -10 -12   4    2.81    0.46
   9  12  -4    0.30    0.35
  -9 -12   4    0.16    0.33
   8  12  -4    2.29    0.40
  -8 -12   4    1.14    0.30
  -8 -12   4    1.50    0.38
   7  12  -4    6.82    0.53
  -7 -12   4    5.81    0.43
  -7 -12   4    6.39    0.49
   6  12  -4    4.17    0.42
  -6 -12   4    3.19    0.38
  -6 -12   4    3.87    0.35
   5  12  -4    0.18    0.28
  -5 -12   4    0.04    0.24
  -5 -12   4   -0.16    0.25
   4  12  -4   12.24    0.62
  -4 -12   4   10.55    0.52
  -4 -12   4   12.02    0.51
   3  12  -4    1.88    0.33
  -3 -12   4    3.22    0.31
  -3 -12   4    2.81    0.31
   2  12  -4    3.40    0.37
  -2 -12   4    3.77    0.31
  -2 -12   4    2.96    0.30
   1  12  -4    0.24    0.25
  -1 -12   4   -0.16    0.21
  -1 -12   4   -0.13    0.19
   0  12  -4    3.47    0.35
   0 -12   4    3.43    0.29
   0 -12   4    3.87    0.29
  -1  12  -4    3.70    0.35
   1 -12   4    3.58    0.29
   1 -12   4    3.75    0.29
  -2  12  -4    9.54    0.51
   2 -12   4    8.83    0.41
   2 -12   4   10.74    0.42
  -3  12  -4    0.26    0.26
   3 -12   4    0.32    0.20
   3 -12   4    0.00    0.17
  -4  12  -4    5.57    0.41
   4 -12   4    5.28    0.35
  -5  12  -4    1.96    0.31
   5 -12   4    1.53    0.27
  -6  12  -4    6.17    0.43
   6 -12   4    6.37    0.44
  -7  12  -4    0.11    0.24
   7 -12   4   -0.08    0.23
  -8  12  -4    7.57    0.47
   8 -12   4    7.98    0.51
  -9  12  -4    0.13    0.26
   9 -12   4    0.31    0.28
 -10  12  -4    8.49    0.54
  10 -12   4    8.95    0.54
 -11  12  -4    0.29    0.30
  11 -12   4    0.32    0.31
 -12  12  -4    2.24    0.37
  12 -12   4    2.10    0.41
 -13  12  -4    0.04    0.33
  13 -12   4    0.25    0.35
 -14  12  -4    6.93    0.54
  14 -12   4    7.33    0.60
 -15  12  -4    0.14    0.37
  15 -12   4    0.40    0.41
  11  11  -4    0.28    0.40
 -11 -11   4    0.45    0.37
  10  11  -4    0.21    0.37
 -10 -11   4    0.58    0.36
 -10 -11   4   -0.19    0.28
   9  11  -4    4.23    0.44
  -9 -11   4    4.60    0.45
  -9 -11   4    4.70    0.39
   8  11  -4    1.58    0.36
  -8 -11   4    2.16    0.32
  -8 -11   4    1.91    0.34
   7  11  -4    0.06    0.31
  -7 -11   4    0.36    0.24
  -7 -11   4   -0.09    0.26
   6  11  -4   -0.45    0.26
  -6 -11   4   -0.16    0.22
  -6 -11   4    0.14    0.26
  -5 -11   4   13.80    0.52
  -5 -11   4   13.82    0.57
   4  11  -4    4.50    0.39
  -4 -11   4    3.99    0.31
  -4 -11   4    4.55    0.35
   3  11  -4    2.79    0.33
  -3 -11   4    3.05    0.27
  -3 -11   4    3.07    0.30
   2  11  -4   10.42    0.54
  -2 -11   4   10.46    0.43
  -2 -11   4    8.99    0.43
   1  11  -4    8.08    0.46
  -1 -11   4    7.86    0.36
  -1 -11   4    7.91    0.41
   0  11  -4    1.15    0.26
   0 -11   4    1.01    0.21
   0 -11   4    1.18    0.21
  -1  11  -4   10.75    0.50
   1 -11   4   11.01    0.42
   1 -11   4   10.73    0.40
   1 -11   4   10.09    0.40
  -2  11  -4    3.53    0.32
   2 -11   4    3.57    0.25
   2 -11   4    3.38    0.27
   2 -11   4    3.95    0.27
  -3  11  -4   39.40    1.06
   3 -11   4   38.71    0.94
   3 -11   4   41.92    0.95
   3 -11   4   38.51    0.98
  -4  11  -4    4.19    0.34
   4 -11   4    4.76    0.29
   4 -11   4    4.81    0.32
  -5  11  -4    0.20    0.21
   5 -11   4   -0.18    0.18
  -6  11  -4   19.12    0.64
   6 -11   4   17.64    0.64
  -7  11  -4    1.37    0.26
   7 -11   4    1.04    0.25
  -8  11  -4   31.39    0.91
   8 -11   4   30.76    0.93
  -9  11  -4    1.50    0.28
   9 -11   4    1.17    0.29
 -10  11  -4   28.36    0.89
  10 -11   4   29.08    0.94
 -11  11  -4    0.58    0.28
  11 -11   4    0.66    0.32
 -12  11  -4   14.91    0.67
  12 -11   4   13.79    0.67
 -13  11  -4    0.66    0.33
  13 -11   4   -0.11    0.33
 -14  11  -4   -0.03    0.34
  14 -11   4    0.35    0.37
 -15  11  -4    3.72    0.46
  15 -11   4    3.98    0.52
  12  10  -4    0.72    0.40
 -12 -10   4   -0.15    0.30
 -12 -10   4    0.56    0.38
  11  10  -4    1.13    0.37
 -11 -10   4    1.24    0.37
 -11 -10   4    1.14    0.32
  10  10  -4    0.19    0.32
 -10 -10   4   -0.15    0.31
 -10 -10   4   -0.23    0.25
   9  10  -4    0.10    0.32
  -9 -10   4    0.11    0.29
  -9 -10   4    0.30    0.26
   8  10  -4    0.00    0.30
  -8 -10   4    0.39    0.25
  -8 -10   4   -0.27    0.25
   7  10  -4    1.45    0.31
  -7 -10   4    1.18    0.26
  -7 -10   4    1.33    0.29
   6  10  -4    0.97    0.30
  -6 -10   4    0.55    0.22
  -6 -10   4    0.87    0.27
   5  10  -4    3.17    0.34
  -5 -10   4    2.96    0.31
  -5 -10   4    3.31    0.28
   4  10  -4    0.82    0.25
  -4 -10   4    1.13    0.21
  -4 -10   4    1.39    0.26
   3  10  -4    9.00    0.50
  -3 -10   4    9.72    0.38
  -3 -10   4    8.70    0.44
   2  10  -4   32.48    0.91
  -2 -10   4   31.88    0.85
  -2 -10   4   32.68    0.81
   1  10  -4    0.02    0.19
  -1 -10   4   -0.05    0.15
  -1 -10   4    0.14    0.18
   0  10  -4   -0.13    0.20
   0 -10   4    0.11    0.13
   0 -10   4   -0.07    0.16
   0 -10   4    0.22    0.16
  -1  10  -4    0.90    0.21
   1 -10   4    0.55    0.16
   1 -10   4    0.56    0.17
   1 -10   4    0.51    0.15
  -2  10  -4   14.00    0.55
   2 -10   4   14.42    0.45
   2 -10   4   14.76    0.46
   2 -10   4   14.65    0.47
  -3  10  -4    0.06    0.14
  -3  10  -4    0.33    0.19
   3 -10   4    0.18    0.15
   3 -10   4    0.15    0.16
   3 -10   4    0.23    0.16
  -4  10  -4    1.13    0.23
  -4  10  -4    1.13    0.19
   4 -10   4    0.85    0.18
   4 -10   4    1.27    0.21
   4 -10   4    1.03    0.16
  -5  10  -4    2.00    0.25
  -5  10  -4    2.04    0.22
   5 -10   4    1.99    0.25
  -6  10  -4   28.78    0.80
  -6  10  -4   26.70    0.73
   6 -10   4   28.67    0.81
  -7  10  -4    4.64    0.33
  -7  10  -4    4.17    0.29
   7 -10   4    4.57    0.34
  -8  10  -4   10.21    0.50
   8 -10   4    9.99    0.49
  -9  10  -4   -0.11    0.23
  -9  10  -4    0.19    0.21
   9 -10   4   -0.03    0.24
 -10  10  -4   15.50    0.55
 -10  10  -4   16.74    0.62
  10 -10   4   15.12    0.64
 -11  10  -4    0.56    0.26
  11 -10   4    0.40    0.30
 -12  10  -4    0.39    0.29
  12 -10   4    0.10    0.33
 -13  10  -4    1.30    0.34
  13 -10   4    1.50    0.38
 -14  10  -4   -0.07    0.32
  14 -10   4    0.42    0.35
 -15  10  -4    0.66    0.36
  15 -10   4    0.97    0.44
  13   9  -4    1.67    0.44
 -13  -9   4    0.62    0.40
 -13  -9   4    0.63    0.35
  12   9  -4    0.30    0.37
 -12  -9   4    0.04    0.36
 -12  -9   4    0.20    0.29
  11   9  -4    0.15    0.35
 -11  -9   4    0.42    0.30
 -11  -9   4    0.08    0.33
  10   9  -4    0.45    0.31
 -10  -9   4    0.21    0.26
 -10  -9   4    0.02    0.29
   9   9  -4    0.99    0.32
  -9  -9   4    1.30    0.27
  -9  -9   4    1.02    0.31
   8   9  -4    0.47    0.30
  -8  -9   4    0.50    0.22
  -8  -9   4    0.48    0.28
   7   9  -4   -0.02    0.24
  -7  -9   4    0.32    0.20
  -7  -9   4    0.11    0.24
   6   9  -4    6.12    0.41
  -6  -9   4    6.04    0.33
  -6  -9   4    5.44    0.38
   5   9  -4    3.13    0.33
  -5  -9   4    3.07    0.29
  -5  -9   4    3.68    0.27
   4   9  -4    1.22    0.24
  -4  -9   4    1.75    0.24
  -4  -9   4    1.60    0.21
   3   9  -4    0.03    0.19
  -3  -9   4   -0.30    0.16
  -3  -9   4    0.07    0.16
   2   9  -4   17.62    0.59
  -2  -9   4   17.61    0.50
  -2  -9   4   17.58    0.55
   1   9  -4    1.96    0.24
  -1  -9   4    1.98    0.15
  -1  -9   4    1.69    0.20
  -1  -9   4    1.83    0.19
   0   9  -4    0.78    0.19
   0  -9   4    0.96    0.17
   0  -9   4    0.90    0.14
   0  -9   4    0.97    0.16
  -1   9  -4   22.33    0.68
  -1   9  -4   23.06    0.58
   1  -9   4   22.65    0.59
   1  -9   4   22.02    0.60
   1  -9   4   22.67    0.59
  -2   9  -4    5.74    0.28
  -2   9  -4    6.94    0.36
   2  -9   4    6.65    0.29
   2  -9   4    7.05    0.31
  -3   9  -4    0.25    0.17
  -3   9  -4    0.06    0.13
   3  -9   4    0.14    0.12
   3  -9   4    0.24    0.15
   3  -9   4    0.07    0.13
  -4   9  -4   42.48    1.04
  -4   9  -4   41.01    0.95
   4  -9   4   41.00    1.01
   4  -9   4   41.57    0.96
   4  -9   4   42.94    0.94
  -5   9  -4    1.42    0.21
  -5   9  -4    1.64    0.21
   5  -9   4    1.35    0.18
   5  -9   4    1.64    0.23
   5  -9   4    1.67    0.15
  -6   9  -4   11.24    0.47
  -6   9  -4   10.98    0.40
   6  -9   4   12.01    0.49
  -7   9  -4    1.37    0.22
  -7   9  -4    0.99    0.19
   7  -9   4    0.81    0.22
  -8   9  -4   19.89    0.63
  -8   9  -4   21.75    0.61
   8  -9   4   19.78    0.68
  -9   9  -4    1.42    0.26
  -9   9  -4    1.45    0.23
   9  -9   4    1.01    0.26
 -10   9  -4    0.22    0.24
 -10   9  -4    0.37    0.21
  10  -9   4    0.10    0.25
 -11   9  -4    1.92    0.31
 -11   9  -4    2.25    0.29
  11  -9   4    1.81    0.33
 -12   9  -4   20.11    0.73
 -12   9  -4   20.38    0.67
  12  -9   4   19.79    0.77
 -13   9  -4    5.05    0.43
  13  -9   4    5.27    0.48
 -14   9  -4    2.73    0.39
  14  -9   4    2.99    0.43
 -15   9  -4    0.21    0.34
  15  -9   4   -0.42    0.37
 -16   9  -4    4.25    0.47
  16  -9   4    3.37    0.50
  13   8  -4    0.72    0.39
 -13  -8   4    0.61    0.39
 -13  -8   4    0.63    0.31
  12   8  -4    3.57    0.44
 -12  -8   4    3.48    0.43
 -12  -8   4    3.40    0.36
  11   8  -4    0.17    0.32
 -11  -8   4    0.40    0.30
 -11  -8   4    0.77    0.28
  10   8  -4    3.97    0.39
 -10  -8   4    4.12    0.33
 -10  -8   4    3.59    0.39
   9   8  -4   -0.06    0.26
  -9  -8   4    0.05    0.22
  -9  -8   4   -0.37    0.23
   8   8  -4    0.36    0.25
  -8  -8   4    0.35    0.24
  -8  -8   4    0.25    0.21
   7   8  -4    1.71    0.27
  -7  -8   4    1.91    0.22
  -7  -8   4    1.84    0.27
   6   8  -4   16.44    0.60
  -6  -8   4   14.93    0.49
  -6  -8   4   15.79    0.56
   5   8  -4    2.99    0.28
  -5  -8   4    2.62    0.22
  -5  -8   4    2.80    0.26
   4   8  -4    1.69    0.23
  -4  -8   4    1.77    0.22
  -4  -8   4    1.78    0.20
   3   8  -4   30.94    0.83
  -3  -8   4   29.14    0.78
  -3  -8   4   29.44    0.72
   2   8  -4   10.65    0.43
  -2  -8   4   10.40    0.35
  -2  -8   4   10.41    0.40
   1   8  -4    0.53    0.17
  -1  -8   4    0.48    0.10
  -1  -8   4    0.51    0.14
  -1  -8   4    0.67    0.16
   0   8  -4   20.35    0.52
   0   8  -4   21.10    0.61
   0  -8   4   20.29    0.53
   0  -8   4   20.30    0.52
   0  -8   4   19.89    0.55
  -1   8  -4    3.49    0.25
  -1   8  -4    3.45    0.23
   1  -8   4    4.13    0.22
   1  -8   4    3.94    0.23
   1  -8   4    3.87    0.22
  -2   8  -4    0.67    0.17
  -2   8  -4    0.66    0.13
   2  -8   4    1.05    0.15
   2  -8   4    0.68    0.14
   2  -8   4    0.36    0.12
  -3   8  -4    9.10    0.38
  -3   8  -4    9.30    0.33
   3  -8   4    9.08    0.36
   3  -8   4   10.41    0.34
   3  -8   4    9.81    0.32
  -4   8  -4    0.54    0.16
  -4   8  -4    0.62    0.14
   4  -8   4    0.49    0.14
   4  -8   4    0.73    0.16
   4  -8   4    0.31    0.11
  -5   8  -4    0.38    0.14
  -5   8  -4    0.81    0.19
   5  -8   4    0.39    0.14
   5  -8   4    0.48    0.17
   5  -8   4    0.37    0.11
  -6   8  -4   27.34    0.74
  -6   8  -4   28.07    0.64
  -6   8  -4   27.48    0.70
   6  -8   4   29.19    0.70
   6  -8   4   27.07    0.76
  -7   8  -4    0.18    0.15
  -7   8  -4    0.15    0.18
   7  -8   4    0.16    0.19
  -8   8  -4    1.77    0.23
  -8   8  -4    1.46    0.21
   8  -8   4    1.33    0.24
  -9   8  -4    1.18    0.23
  -9   8  -4    1.57    0.22
   9  -8   4    0.92    0.25
 -10   8  -4    5.62    0.37
 -10   8  -4    5.04    0.33
  10  -8   4    5.63    0.41
 -11   8  -4    0.11    0.22
 -11   8  -4    0.22    0.24
  11  -8   4   -0.25    0.27
 -12   8  -4    0.81    0.25
 -12   8  -4    0.58    0.25
  12  -8   4    1.30    0.34
 -13   8  -4    4.38    0.40
 -13   8  -4    3.57    0.35
  13  -8   4    4.63    0.47
 -14   8  -4    5.94    0.46
  14  -8   4    5.80    0.51
 -15   8  -4    1.11    0.36
  15  -8   4    0.88    0.38
 -16   8  -4    0.27    0.37
  16  -8   4    0.65    0.41
  14   7  -4   -0.01    0.35
 -14  -7   4    0.29    0.32
 -14  -7   4   -0.43    0.36
  13   7  -4    0.18    0.32
 -13  -7   4   -0.14    0.34
 -13  -7   4    0.02    0.27
  12   7  -4    1.25    0.33
 -12  -7   4    0.88    0.29
 -12  -7   4    1.22    0.34
  11   7  -4   -0.03    0.28
 -11  -7   4   -0.10    0.27
 -11  -7   4   -0.30    0.23
  10   7  -4    0.29    0.29
 -10  -7   4    0.49    0.29
 -10  -7   4    0.43    0.24
   9   7  -4   10.18    0.53
  -9  -7   4   11.20    0.54
  -9  -7   4   10.66    0.44
   8   7  -4    4.19    0.34
  -8  -7   4    4.35    0.30
  -8  -7   4    4.57    0.35
   7   7  -4    0.24    0.22
  -7  -7   4    0.42    0.21
  -7  -7   4    0.20    0.16
   6   7  -4    8.13    0.44
  -6  -7   4    8.17    0.40
  -6  -7   4    7.83    0.34
   5   7  -4    0.30    0.18
  -5  -7   4    0.52    0.14
  -5  -7   4    0.49    0.19
   4   7  -4   81.57    1.78
  -4  -7   4   77.11    1.63
  -4  -7   4   79.52    1.75
   3   7  -4    0.06    0.15
  -3  -7   4   -0.21    0.13
  -3  -7   4    0.04    0.11
   2   7  -4   32.32    0.82
   2   7  -4   32.51    0.72
  -2  -7   4   31.22    0.68
  -2  -7   4   31.77    0.78
  -2  -7   4   33.00    0.73
   1   7  -4    0.83    0.16
  -1  -7   4    1.26    0.16
  -1  -7   4    1.15    0.11
  -1  -7   4    0.96    0.13
   0   7  -4  124.10    2.62
   0   7  -4  122.95    2.44
   0  -7   4  127.14    2.45
   0  -7   4  124.00    2.56
   0  -7   4  122.10    2.51
  -1   7  -4   -0.07    0.10
  -1   7  -4    0.01    0.12
   1  -7   4    0.03    0.10
   1  -7   4   -0.09    0.09
   1  -7   4   -0.18    0.09
  -2   7  -4    9.56    0.30
  -2   7  -4    8.93    0.35
   2  -7   4    9.53    0.31
   2  -7   4    9.14    0.30
   2  -7   4    9.71    0.33
  -3   7  -4    1.14    0.17
  -3   7  -4    0.94    0.13
   3  -7   4    0.79    0.12
   3  -7   4    0.97    0.14
   3  -7   4    0.91    0.13
  -4   7  -4  108.20    2.28
  -4   7  -4  106.74    2.14
   4  -7   4  106.67    2.14
   4  -7   4  107.66    2.18
   4  -7   4  103.78    2.25
  -5   7  -4    0.05    0.11
  -5   7  -4    0.10    0.09
  -5   7  -4    0.01    0.14
   5  -7   4   -0.01    0.14
   5  -7   4   -0.08    0.10
  -6   7  -4    4.63    0.29
  -6   7  -4    5.41    0.21
  -6   7  -4    5.40    0.28
   6  -7   4    5.03    0.33
   6  -7   4    5.20    0.26
  -7   7  -4    0.04    0.15
  -7   7  -4    0.13    0.10
  -7   7  -4    0.02    0.14
   7  -7   4    0.01    0.13
   7  -7   4   -0.15    0.17
  -8   7  -4   64.57    1.49
  -8   7  -4   65.14    1.42
   8  -7   4   67.11    1.54
  -9   7  -4    2.20    0.23
  -9   7  -4    2.33    0.25
   9  -7   4    2.00    0.28
 -10   7  -4    2.27    0.27
 -10   7  -4    2.17    0.26
  10  -7   4    1.79    0.30
 -11   7  -4    1.00    0.23
 -11   7  -4    0.98    0.24
  11  -7   4    0.95    0.30
 -12   7  -4   19.98    0.63
 -12   7  -4   19.48    0.68
  12  -7   4   18.15    0.74
 -13   7  -4    7.77    0.48
 -13   7  -4    7.10    0.43
  13  -7   4    7.08    0.53
 -14   7  -4   -0.06    0.30
  14  -7   4   -0.06    0.31
 -15   7  -4    0.28    0.33
  15  -7   4    0.75    0.35
  16  -7   4   -0.03    0.36
  14   6  -4    0.01    0.33
 -14  -6   4   -0.15    0.34
 -14  -6   4    0.21    0.30
  13   6  -4    0.09    0.34
 -13  -6   4    0.42    0.32
 -13  -6   4    0.31    0.28
  12   6  -4    1.18    0.34
 -12  -6   4    0.59    0.32
 -12  -6   4    0.55    0.25
  11   6  -4    3.91    0.38
 -11  -6   4    3.93    0.39
 -11  -6   4    4.55    0.33
  10   6  -4    1.76    0.31
 -10  -6   4    1.57    0.24
 -10  -6   4    1.45    0.28
   9   6  -4   11.01    0.50
  -9  -6   4   11.67    0.44
  -9  -6   4   10.73    0.50
   8   6  -4    0.59    0.24
  -8  -6   4    0.89    0.19
  -8  -6   4    0.52    0.22
   7   6  -4    8.54    0.41
  -7  -6   4    8.78    0.35
  -7  -6   4    8.53    0.41
   6   6  -4    0.57    0.20
  -6  -6   4    0.67    0.15
  -6  -6   4    0.50    0.18
   5   6  -4   13.06    0.45
  -5  -6   4   11.92    0.37
  -5  -6   4   11.70    0.43
   4   6  -4    3.25    0.24
  -4  -6   4    3.71    0.26
  -4  -6   4    3.30    0.21
   3   6  -4    5.45    0.28
  -3  -6   4    4.92    0.22
  -3  -6   4    4.97    0.28
   2   6  -4   58.40    1.18
   2   6  -4   56.95    1.29
  -2  -6   4   55.75    1.26
  -2  -6   4   56.85    1.15
  -2  -6   4   58.45    1.19
   1   6  -4    9.63    0.35
   1   6  -4    9.61    0.29
  -1  -6   4    9.82    0.29
  -1  -6   4    9.54    0.33
  -1  -6   4    9.15    0.26
   0   6  -4    4.88    0.25
   0   6  -4    4.64    0.19
   0  -6   4    5.05    0.20
   0  -6   4    4.51    0.23
   0  -6   4    4.53    0.20
  -1   6  -4    0.26    0.12
  -1   6  -4    0.27    0.09
   1  -6   4    0.18    0.09
   1  -6   4    0.06    0.09
   1  -6   4    0.26    0.09
  -2   6  -4    4.16    0.20
  -2   6  -4    4.49    0.24
   2  -6   4    4.05    0.22
   2  -6   4    4.38    0.20
   2  -6   4    4.30    0.20
  -3   6  -4    1.17    0.15
  -3   6  -4    0.97    0.12
   3  -6   4    0.81    0.13
   3  -6   4    1.02    0.11
   3  -6   4    0.85    0.12
  -4   6  -4    2.07    0.18
  -4   6  -4    1.76    0.15
   4  -6   4    1.97    0.13
   4  -6   4    1.84    0.18
   4  -6   4    1.84    0.15
  -5   6  -4    1.19    0.11
  -5   6  -4    1.12    0.16
  -5   6  -4    1.62    0.16
   5  -6   4    1.27    0.17
   5  -6   4    1.17    0.14
  -6   6  -4   28.70    0.67
  -6   6  -4   27.59    0.63
  -6   6  -4   27.51    0.71
   6  -6   4   27.24    0.66
   6  -6   4   26.26    0.73
  -7   6  -4    1.58    0.18
  -7   6  -4    2.03    0.15
  -7   6  -4    2.10    0.20
   7  -6   4    1.73    0.22
   7  -6   4    2.21    0.18
  -8   6  -4    7.67    0.32
  -8   6  -4    7.44    0.36
  -8   6  -4    7.33    0.29
   8  -6   4    7.11    0.39
  -9   6  -4    1.56    0.22
  -9   6  -4    2.06    0.22
   9  -6   4    1.94    0.28
 -10   6  -4   24.11    0.71
 -10   6  -4   23.64    0.66
  10  -6   4   23.70    0.76
 -11   6  -4    6.34    0.37
 -11   6  -4    6.46    0.38
  11  -6   4    5.27    0.41
 -12   6  -4    2.74    0.30
 -12   6  -4    2.43    0.31
  12  -6   4    2.36    0.34
 -13   6  -4    0.36    0.25
 -13   6  -4   -0.02    0.23
  13  -6   4    0.01    0.28
 -14   6  -4   14.14    0.62
 -14   6  -4   13.86    0.58
  14  -6   4   15.73    0.71
 -15   6  -4   10.02    0.57
  15  -6   4   10.61    0.61
  16  -6   4   -0.25    0.36
  15   5  -4    0.34    0.35
 -15  -5   4    0.06    0.36
 -15  -5   4    0.29    0.32
  14   5  -4    0.04    0.32
 -14  -5   4    0.21    0.34
 -14  -5   4    0.75    0.30
  13   5  -4    5.01    0.46
 -13  -5   4    5.12    0.46
 -13  -5   4    5.14    0.39
  12   5  -4    3.17    0.36
 -12  -5   4    3.08    0.32
 -12  -5   4    3.59    0.37
  11   5  -4    1.98    0.31
 -11  -5   4    1.84    0.30
 -11  -5   4    2.13    0.27
  10   5  -4   12.25    0.53
 -10  -5   4   12.89    0.47
 -10  -5   4   11.99    0.55
  -9  -5   4   15.61    0.57
  -9  -5   4   16.58    0.51
   8   5  -4   40.46    1.03
  -8  -5   4   40.51    1.03
  -8  -5   4   40.17    0.93
   7   5  -4   11.62    0.44
  -7  -5   4   10.45    0.43
  -7  -5   4   11.30    0.38
   6   5  -4    2.33    0.23
  -6  -5   4    2.94    0.20
  -6  -5   4    2.67    0.23
  -5  -5   4   25.06    0.67
  -5  -5   4   25.40    0.59
   4   5  -4   50.29    1.16
  -4  -5   4   49.91    1.15
  -4  -5   4   51.35    1.06
   3   5  -4   39.51    0.92
  -3  -5   4   38.59    0.91
  -3  -5   4   40.75    0.85
   2   5  -4    0.32    0.12
  -2  -5   4    0.40    0.11
  -2  -5   4    0.41    0.04
  -2  -5   4    0.39    0.09
   1   5  -4   15.34    0.36
   1   5  -4   15.58    0.43
  -1  -5   4   15.27    0.41
  -1  -5   4   14.49    0.37
  -1  -5   4   14.98    0.35
   0   5  -4  189.26    3.73
   0   5  -4  192.96    3.96
   0  -5   4  192.94    3.86
   0  -5   4  198.28    3.73
   0  -5   4  196.55    3.91
  -1   5  -4    0.24    0.07
  -1   5  -4    0.31    0.10
   1  -5   4    0.23    0.08
   1  -5   4    0.28    0.09
   1  -5   4    0.11    0.08
  -2   5  -4   21.48    0.49
  -2   5  -4   20.57    0.53
   2  -5   4   20.62    0.52
   2  -5   4   21.17    0.50
   2  -5   4   21.83    0.50
  -3   5  -4    0.59    0.10
  -3   5  -4    0.55    0.10
   3  -5   4    0.51    0.11
   3  -5   4    0.30    0.08
   3  -5   4    0.42    0.09
  -4   5  -4    4.58    0.23
  -4   5  -4    4.85    0.19
  -4   5  -4    4.31    0.20
   4  -5   4    3.71    0.23
   4  -5   4    4.10    0.20
  -5   5  -4    2.20    0.16
  -5   5  -4    2.28    0.17
  -5   5  -4    1.90    0.13
   5  -5   4    1.79    0.15
   5  -5   4    1.79    0.18
  -6   5  -4   33.64    0.82
  -6   5  -4   34.97    0.78
  -6   5  -4   34.96    0.77
   6  -5   4   34.37    0.86
   6  -5   4   33.11    0.77
  -7   5  -4    0.00    0.10
  -7   5  -4    0.11    0.14
  -7   5  -4   -0.10    0.12
   7  -5   4    0.14    0.15
   7  -5   4    0.07    0.11
  -8   5  -4   42.87    0.95
  -8   5  -4   41.33    1.00
  -8   5  -4   39.79    0.95
   8  -5   4   43.42    1.05
  -9   5  -4    0.47    0.14
  -9   5  -4    0.31    0.16
  -9   5  -4    0.27    0.18
   9  -5   4    0.69    0.22
 -10   5  -4    9.45    0.40
 -10   5  -4   10.67    0.44
  10  -5   4   12.05    0.52
 -11   5  -4    0.10    0.19
 -11   5  -4   -0.09    0.20
  11  -5   4   -0.25    0.24
 -12   5  -4   11.60    0.51
 -12   5  -4   12.20    0.50
  12  -5   4   11.84    0.58
 -13   5  -4    2.66    0.31
 -13   5  -4    3.47    0.32
  13  -5   4    2.97    0.39
 -14   5  -4   -0.09    0.28
 -14   5  -4    0.26    0.26
  14  -5   4    0.08    0.30
 -15   5  -4    1.94    0.36
  15  -5   4    1.90    0.40
  16  -5   4    0.18    0.35
  17  -5   4    2.65    0.44
  15   4  -4    1.55    0.39
 -15  -4   4    2.30    0.39
 -15  -4   4    1.25    0.31
  14   4  -4   -0.03    0.34
 -14  -4   4   -0.28    0.31
 -14  -4   4    0.01    0.27
  13   4  -4    4.44    0.43
 -13  -4   4    4.43    0.36
 -13  -4   4    4.86    0.43
  12   4  -4    0.32    0.28
 -12  -4   4   -0.19    0.22
 -12  -4   4    0.51    0.28
  11   4  -4    0.69    0.27
 -11  -4   4    0.57    0.24
 -11  -4   4    0.68    0.22
  10   4  -4    1.03    0.25
 -10  -4   4    0.93    0.20
 -10  -4   4    1.22    0.26
   9   4  -4    1.62    0.24
  -9  -4   4    1.47    0.20
  -9  -4   4    1.60    0.23
   8   4  -4    2.44    0.24
  -8  -4   4    2.80    0.25
  -8  -4   4    2.10    0.19
   7   4  -4   13.52    0.47
  -7  -4   4   14.32    0.47
  -7  -4   4   14.33    0.41
   6   4  -4   25.11    0.69
  -6  -4   4   26.44    0.68
  -6  -4   4   25.15    0.60
   5   4  -4    1.21    0.17
  -5  -4   4    1.03    0.15
  -5  -4   4    1.09    0.12
   4   4  -4    2.72    0.19
  -4  -4   4    3.02    0.21
  -4  -4   4    2.89    0.16
   3   4  -4    8.15    0.30
  -3  -4   4    8.11    0.24
   2   4  -4   43.37    0.99
  -2  -4   4   43.50    0.98
  -2  -4   4   44.36    0.91
  -2  -4   4   45.99    0.88
   1   4  -4   -0.03    0.08
  -1  -4   4    0.07    0.05
  -1  -4   4   -0.01    0.07
  -1  -4   4    0.04    0.06
   0   4  -4   12.01    0.30
   0   4  -4   12.39    0.34
   0  -4   4   12.14    0.31
   0  -4   4   11.55    0.30
   0  -4   4   11.97    0.32
  -1   4  -4    0.69    0.08
  -1   4  -4    0.47    0.09
   1  -4   4    0.74    0.09
   1  -4   4    0.57    0.09
   1  -4   4    0.46    0.07
  -2   4  -4  301.05    6.09
  -2   4  -4  309.61    5.77
   2  -4   4  298.48    6.00
   2  -4   4  306.09    6.02
   2  -4   4  298.35    5.77
  -3   4  -4    0.01    0.08
  -3   4  -4    0.12    0.07
   3  -4   4   -0.01    0.07
   3  -4   4   -0.06    0.07
   3  -4   4    0.00    0.09
  -4   4  -4    1.70    0.11
  -4   4  -4    1.33    0.12
  -4   4  -4    1.53    0.12
   4  -4   4    1.52    0.15
  -5   4  -4    2.12    0.15
  -5   4  -4    2.42    0.16
  -5   4  -4    2.35    0.16
   5  -4   4    2.06    0.18
   5  -4   4    1.69    0.14
  -6   4  -4   52.29    1.14
  -6   4  -4   53.94    1.13
  -6   4  -4   53.74    1.18
   6  -4   4   54.13    1.13
   6  -4   4   52.56    1.22
  -7   4  -4   29.17    0.73
  -7   4  -4   29.93    0.71
  -7   4  -4   30.01    0.70
   7  -4   4   29.50    0.70
   7  -4   4   30.28    0.79
  -8   4  -4    4.74    0.26
  -8   4  -4    5.61    0.27
  -8   4  -4    5.51    0.27
   8  -4   4    4.91    0.25
   8  -4   4    4.78    0.32
  -9   4  -4    3.09    0.25
  -9   4  -4    2.87    0.23
  -9   4  -4    3.26    0.23
   9  -4   4    3.45    0.30
 -10   4  -4    3.04    0.25
 -10   4  -4    3.27    0.25
 -10   4  -4    2.99    0.26
  10  -4   4    3.32    0.31
 -11   4  -4    7.16    0.39
 -11   4  -4    6.79    0.36
  11  -4   4    6.91    0.45
 -12   4  -4   22.22    0.69
 -12   4  -4   21.27    0.66
  12  -4   4   22.08    0.75
 -13   4  -4    0.01    0.25
 -13   4  -4   -0.52    0.22
  13  -4   4    0.10    0.28
 -14   4  -4    2.11    0.31
 -14   4  -4    2.49    0.34
  14  -4   4    2.63    0.37
 -15   4  -4   12.63    0.61
  15  -4   4   13.94    0.68
  16  -4   4    0.13    0.35
  17  -4   4   -0.47    0.37
  16   3  -4    1.32    0.39
 -16  -3   4    1.02    0.34
  15   3  -4    2.01    0.39
 -15  -3   4    2.42    0.34
 -15  -3   4    3.05    0.41
  14   3  -4   -0.24    0.29
 -14  -3   4    0.01    0.30
 -14  -3   4    0.16    0.26
  13   3  -4    0.78    0.33
 -13  -3   4    1.41    0.31
 -13  -3   4    1.28    0.27
  12   3  -4   12.97    0.60
 -12  -3   4   12.29    0.46
 -12  -3   4   12.68    0.56
  11   3  -4   15.01    0.58
 -11  -3   4   14.15    0.57
 -11  -3   4   14.12    0.49
  10   3  -4   -0.04    0.22
 -10  -3   4   -0.01    0.19
 -10  -3   4    0.00    0.16
   9   3  -4    0.16    0.19
  -9  -3   4    0.32    0.15
  -9  -3   4    0.44    0.18
   8   3  -4   25.78    0.73
  -8  -3   4   26.33    0.64
  -8  -3   4   26.62    0.72
   7   3  -4   28.90    0.75
   7   3  -4   29.83    0.64
  -7  -3   4   28.55    0.74
  -7  -3   4   29.22    0.67
   6   3  -4   24.03    0.52
  -6  -3   4   23.30    0.63
  -6  -3   4   24.30    0.56
  -6  -3   4   23.68    0.55
   5   3  -4    0.68    0.06
   5   3  -4    0.94    0.14
  -5  -3   4    0.44    0.12
  -5  -3   4    0.50    0.09
  -5  -3   4    0.77    0.10
   4   3  -4   79.49    1.72
  -4  -3   4   79.24    1.71
  -4  -3   4   80.62    1.59
  -4  -3   4   84.62    1.60
  -3  -3   4   39.81    0.82
  -3  -3   4   39.93    0.89
  -3  -3   4   40.82    0.82
   2   3  -4  128.33    2.65
  -2  -3   4  130.03    2.49
  -2  -3   4  129.29    2.49
  -2  -3   4  130.31    2.64
  -2  -3   4  129.84    2.54
   1   3  -4   11.47    0.31
  -1  -3   4   11.44    0.28
  -1  -3   4   11.90    0.32
  -1  -3   4   12.00    0.27
   0   3  -4  360.07    7.42
   0  -3   4  370.33    7.36
   0  -3   4  371.73    7.36
   0  -3   4  382.07    7.06
  -1   3  -4    7.29    0.20
  -1   3  -4    7.34    0.23
   1  -3   4    7.42    0.20
   1  -3   4    7.45    0.23
   1  -3   4    7.57    0.22
  -2   3  -4   14.21    0.35
  -2   3  -4   13.66    0.33
   2  -3   4   13.94    0.34
   2  -3   4   13.72    0.37
   2  -3   4   13.68    0.33
  -3   3  -4    1.90    0.12
  -3   3  -4    2.12    0.14
  -3   3  -4    2.06    0.13
   3  -3   4    2.06    0.15
   3  -3   4    2.01    0.13
  -4   3  -4   50.80    1.07
  -4   3  -4   49.96    1.08
  -4   3  -4   50.05    1.04
   4  -3   4   50.38    1.11
   4  -3   4   50.61    1.04
  -5   3  -4   12.74    0.35
  -5   3  -4   12.38    0.35
  -5   3  -4   13.10    0.36
   5  -3   4   12.96    0.41
   5  -3   4   12.95    0.35
  -6   3  -4    2.88    0.18
  -6   3  -4    2.72    0.18
  -6   3  -4    2.56    0.17
   6  -3   4    2.64    0.21
   6  -3   4    2.80    0.18
  -7   3  -4    2.69    0.19
  -7   3  -4    2.42    0.18
  -7   3  -4    2.71    0.18
   7  -3   4    2.67    0.22
   7  -3   4    2.85    0.19
  -8   3  -4   22.34    0.59
  -8   3  -4   21.18    0.57
  -8   3  -4   21.92    0.59
   8  -3   4   23.38    0.65
   8  -3   4   22.12    0.57
  -9   3  -4   64.66    1.39
  -9   3  -4   63.30    1.43
  -9   3  -4   65.07    1.44
   9  -3   4   64.12    1.49
 -10   3  -4    1.08    0.20
 -10   3  -4    1.26    0.21
 -10   3  -4    1.17    0.20
  10  -3   4    0.95    0.23
 -11   3  -4    0.89    0.22
 -11   3  -4    0.87    0.22
 -11   3  -4    0.78    0.21
  11  -3   4    0.99    0.24
 -12   3  -4    8.04    0.40
 -12   3  -4    8.37    0.45
  12  -3   4    7.88    0.48
 -13   3  -4   13.42    0.54
 -13   3  -4   12.27    0.54
  13  -3   4   12.13    0.58
 -14   3  -4    0.27    0.26
 -14   3  -4    0.10    0.28
  14  -3   4   -0.01    0.27
  15  -3   4    1.89    0.38
  16  -3   4    8.88    0.60
  16   2  -4   -0.57    0.33
 -16  -2   4   -0.02    0.28
  15   2  -4    0.93    0.37
 -15  -2   4    0.25    0.27
  14   2  -4    0.24    0.32
 -14  -2   4    0.43    0.26
 -14  -2   4    0.49    0.29
  13   2  -4    0.34    0.30
 -13  -2   4    1.03    0.28
 -13  -2   4    0.41    0.22
  12   2  -4    0.49    0.26
 -12  -2   4    0.05    0.21
 -12  -2   4    0.12    0.20
  11   2  -4    0.22    0.24
 -11  -2   4    0.39    0.18
 -11  -2   4    0.19    0.20
  10   2  -4   21.10    0.67
 -10  -2   4   21.07    0.68
 -10  -2   4   21.55    0.64
 -10  -2   4   20.18    0.57
   9   2  -4   22.24    0.56
  -9  -2   4   21.85    0.63
  -9  -2   4   21.60    0.56
   8   2  -4   13.14    0.36
  -8  -2   4   12.21    0.37
  -8  -2   4   12.44    0.42
  -8  -2   4   12.46    0.45
   7   2  -4   12.02    0.34
  -7  -2   4   12.75    0.35
  -7  -2   4   12.10    0.40
  -7  -2   4   13.08    0.35
  -7  -2   4   12.38    0.42
   6   2  -4   57.15    1.20
  -6  -2   4   59.90    1.19
  -6  -2   4   58.90    1.28
  -6  -2   4   58.80    1.31
  -6  -2   4   57.47    1.19
   5   2  -4    0.11    0.11
   5   2  -4    0.31    0.07
  -5  -2   4    0.13    0.07
  -5  -2   4    0.30    0.10
  -5  -2   4    0.14    0.07
  -5  -2   4    0.37    0.12
   4   2  -4   51.57    1.04
   4   2  -4   50.73    1.12
  -4  -2   4   52.62    1.11
  -4  -2   4   50.97    1.02
  -4  -2   4   51.43    1.02
   3   2  -4    3.53    0.11
  -3  -2   4    3.47    0.12
  -3  -2   4    3.50    0.12
  -3  -2   4    3.76    0.17
   2   2  -4   85.45    1.78
  -2  -2   4   86.93    1.71
  -2  -2   4   86.69    1.66
  -2  -2   4   85.42    1.77
  -2  -2   4   87.67    1.66
   1   2  -4   17.10    0.40
  -1  -2   4   16.73    0.35
  -1  -2   4   16.36    0.40
  -1  -2   4   16.66    0.36
  -1  -2   4   16.39    0.35
   0   2  -4   89.34    1.80
   0  -2   4   88.72    1.80
   0  -2   4   89.49    1.70
   0  -2   4   88.71    1.77
   0  -2   4   86.65    1.70
  -1   2  -4    3.12    0.12
   1  -2   4    3.08    0.14
   1  -2   4    3.30    0.12
   1  -2   4    3.61    0.14
  -2   2  -4  118.65    2.43
  -2   2  -4  119.67    2.32
  -2   2  -4  120.94    2.44
   2  -2   4  119.54    2.43
   2  -2   4  123.80    2.33
  -3   2  -4    0.32    0.07
  -3   2  -4    0.38    0.07
  -3   2  -4    0.30    0.06
   3  -2   4    0.28    0.08
   3  -2   4    0.27    0.07
  -4   2  -4  187.90    3.75
  -4   2  -4  184.82    3.73
  -4   2  -4  184.51    3.58
   4  -2   4  187.47    3.59
   4  -2   4  185.64    3.75
  -5   2  -4    7.56    0.25
  -5   2  -4    7.48    0.25
  -5   2  -4    7.68    0.26
   5  -2   4    8.37    0.26
   5  -2   4    7.68    0.31
  -6   2  -4   29.10    0.68
  -6   2  -4   28.56    0.66
  -6   2  -4   28.13    0.68
[truncated: 1,106,801 more chars]
